# Supplementary material for: Comparative transcriptomic analyses of diploid and tetraploid citrus reveal how ploidy level influences salt stress tolerance
Source: Frontiers journal article supplement (doi:10.3389/fpls.2024.1469115), 2024-10-30
Supplement: Data_Sheet_1.pdf [file Data_Sheet_1.pdf]

## *Supplementary Material*

### **1 Supplementary Data**

Article title: Comparative transcriptomic analyses of diploid and tetraploid Citrus reveal how ploidy level could influence salt stress tolerance

Authors: Marie Bonnin<sup>1</sup>, Alexandre Soriano<sup>2</sup>, Bénédicte Favreau<sup>2</sup>, Radia Lourkisti<sup>1</sup>, Maëva Miranda<sup>2</sup>, Patrick Ollitrault<sup>2</sup>, Julie Oustric<sup>1</sup>, Liliane Berti<sup>1</sup>, Jérémie Santini<sup>1</sup>, Raphaël Morillon<sup>2\*</sup>

- 1 Projet Ressources Naturelles Axe Adaptation des végétaux aux changements globaux, UMR CNRS 6134 SPE, Université de Corse, Corsica, France
- 2 Unité Mixte de Recherche Amélioration Génétique et Adaptation des Plantes méditerranéennes et tropicales (UMR AGAP) Institut, Univ. Montpellier, Centre de coopération Internationale en Recherche Agronomique pour le Développement (CIRAD), Institut National de Recherche pour l'Agriculture, l'Alimentation et l'Environnement (INRAE), Institut Agro, Montpellier, France.

\* **Correspondence:** [raphael.morillon@cirad.fr](mailto:raphael.morillon@cirad.fr) ; +334 67 59 37 19.

The following Supporting Information is available for this article:

**Table S1.** Plant Material

**Table S2 :** GO analysis details and Identification of genes related to these GO terms in *Poncirus trifoliata* (PO) and *Cleopatra mandarin* (CL) 2x and 4x, in control (C) and stressed (S) conditions.

**Table S3.** Specific details regarding the number of reads or gigabytes per sample, the number of clean reads, and the mapping rate

**Fig. S1** Discriminant analysis of transcriptomic data under control conditions.

**Fig. S2** Venn diagram showing the overlap of differentially expressed genes between 2x and 4x CL (a) leaves and (b) roots and PO (c) leaves and (d) roots.

**Fig. S3.** GO enrichment map of genes “stress” in CL leaves (A) and roots (B). Nodes represent enriched GO and edges between nodes indicate their functional similarity. Node size is proportional to the number of expressed genes. Intensity of node orange coloration corresponds to adjusted p-value (p-adjust). Edges length between nodes is proportional to the degree of functional similarity

between them. Nodes having very similar biological functions are clustered and labelled with a summarized name.

**Fig. S4.** GO enrichment map based of ploidy DEGs in PO leaves (A) and roots (B). GO enriched gene sets connected by edges mean that they shared a similarity. Nodes belonging to very similar gene function are clustered and labelled with a summarized name. Node size corresponds to enrichment significance (p-value). Intensity of orange coloration corresponds to adjusted (p-ajust). Node size is proportional to the number of expressed genes. Edges thickness between nodes is proportional to the degree of similarity between them.

**Fig. S5. Mapping and count for Cleopatra mandarin.**

**Fig.S6. Mapping and count for Poncirus trifoliata.**

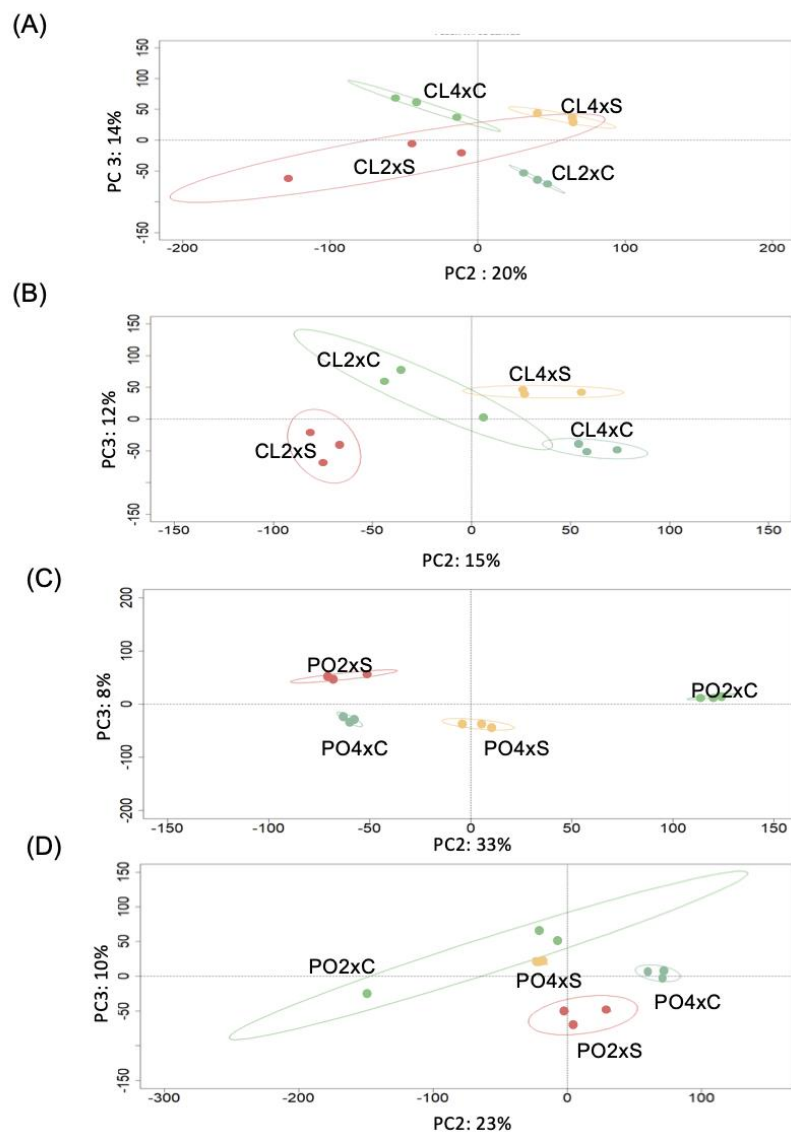

## 2 Supplementary Figures and Tables

### 2.1 Supplementary Figures

**Fig.S1.** Discriminant analysis of transcriptomic data under control conditions. Samples were projected into the space spanned by the second and the third components (PC2 and PC3). PLSDA biplot represented discrimination of Cleopatra mandarin (CL) and Poncirus trifoliata (PO) genotypes at two ploidy levels (2x, 4x) in CL leaves (A), CL roots (B), PO leaves (C) and PO roots (D). Samples are colored according to genotype. Measurements were performed after four weeks of salt stress (90 mM NaCl). Confidence ellipses were set to 95%. C and S represent control and stressed plants, respectively.

(A) CL LEAVES

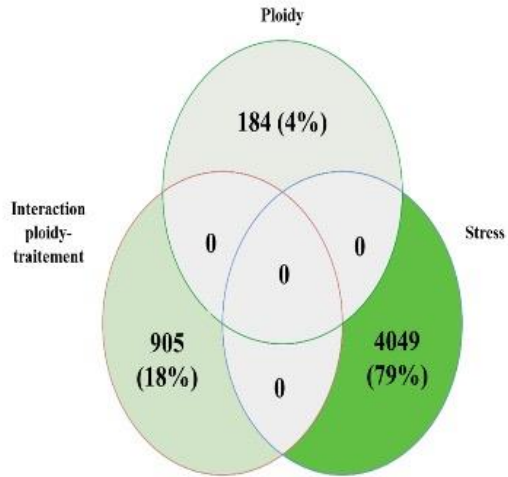

(B) CL ROOTS

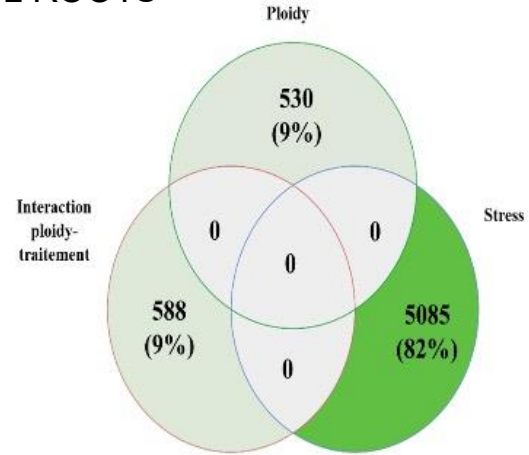

(C) PO LEAVES

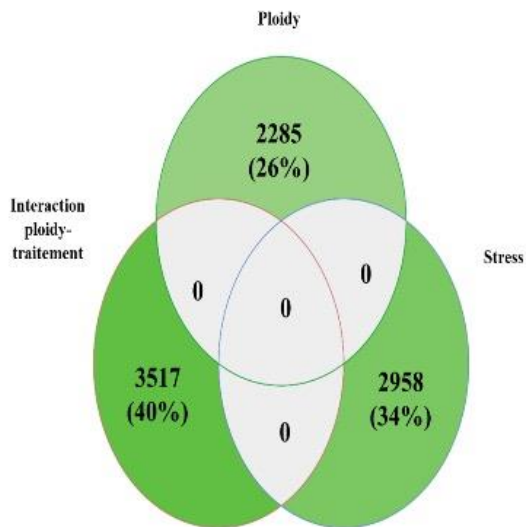

(D) PO ROOTS

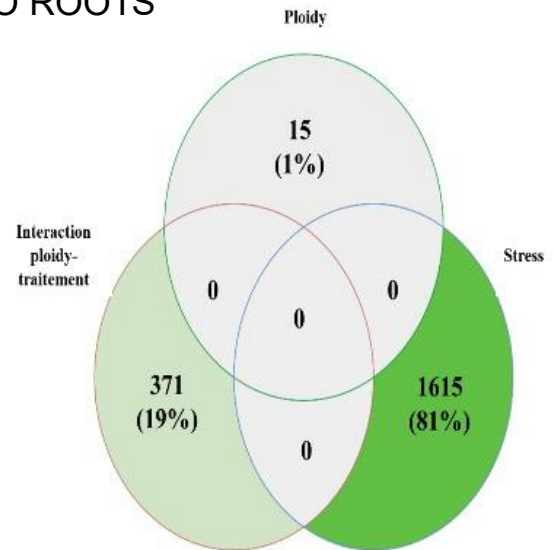

**Fig. S2.** Venn diagram showing the overlap of differentially expressed genes between 2x and 4x CL (A) leaves and (B) roots and PO (C) leaves and (D) roots. Higher gene count number was represented with deeper color as shown by the legend on graph.

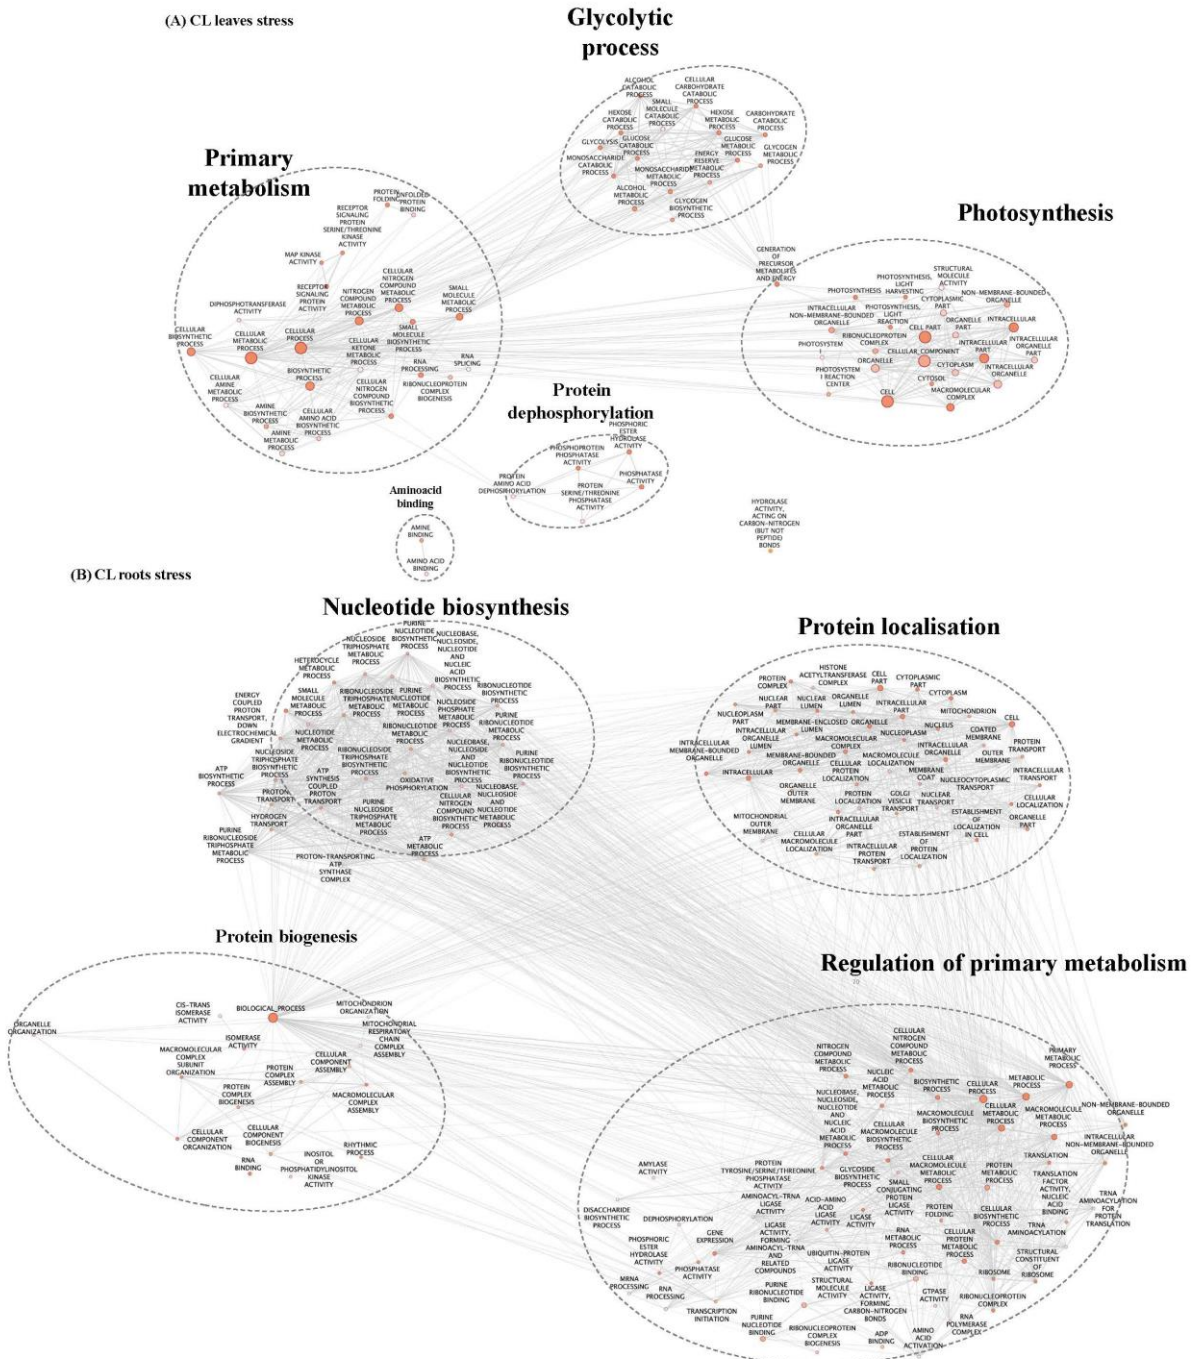

**Fig. S3.** GO enrichment map of genes “stress” in CL leaves (A) and roots (B). Nodes represent enriched GO and edges between nodes indicate their functional similarity. Node size is proportional to the number of expressed genes. Intensity of node orange coloration corresponds to adjusted p-value (p-adjust). Edges length between nodes is proportional to the degree of functional similarity between them. Nodes having very similar biological functions are clustered and labelled with a summarized name.

(a) PO leaves ploidy

## Post-translational regulation

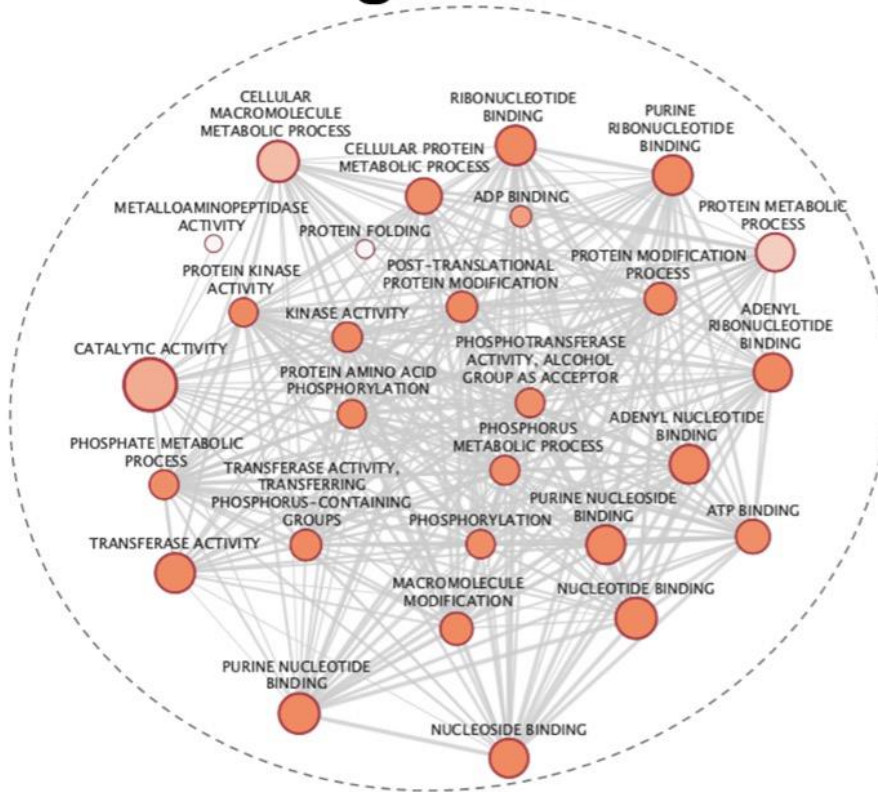

(b) PO roots Ploidy

## Regulation of photosystem II by chlorophyll binding

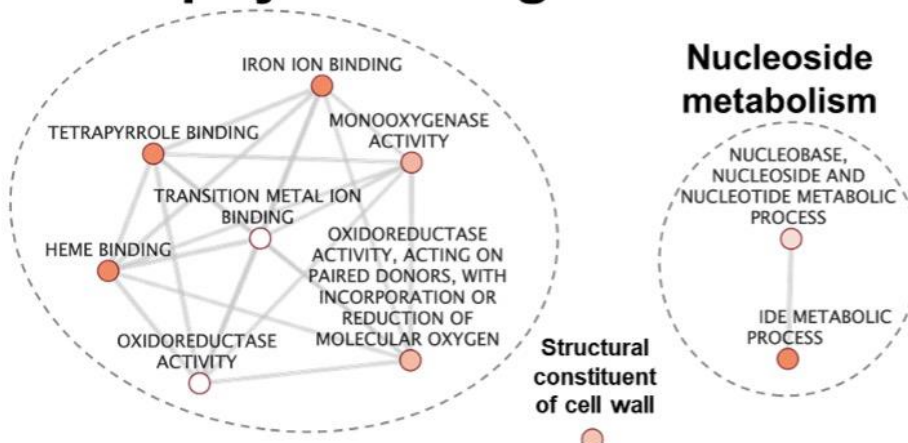



**Fig. S4.** GO enrichment map based of ploidy DEGs in PO leaves (A) and roots (B). GO enriched gene sets connected by edges mean that they shared a similarity. Nodes belonging to very similar gene function are clustered and labelled with a summarized name. Node size corresponds to enrichment significance (p-value). Intensity of orange coloration corresponds to adjusted (p-adjust). Node size is proportional to the number of expressed genes. Edges thickness between nodes is proportional to the degree of similarity between them.

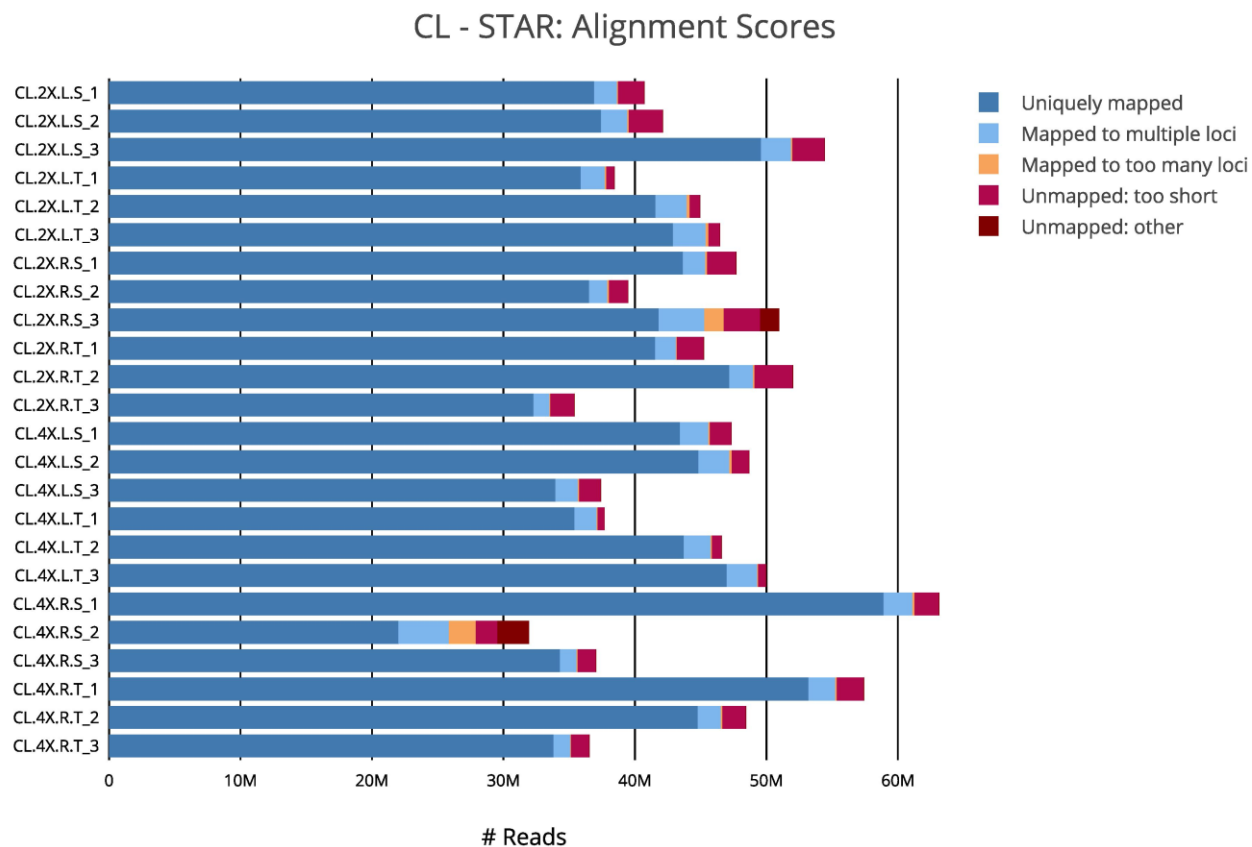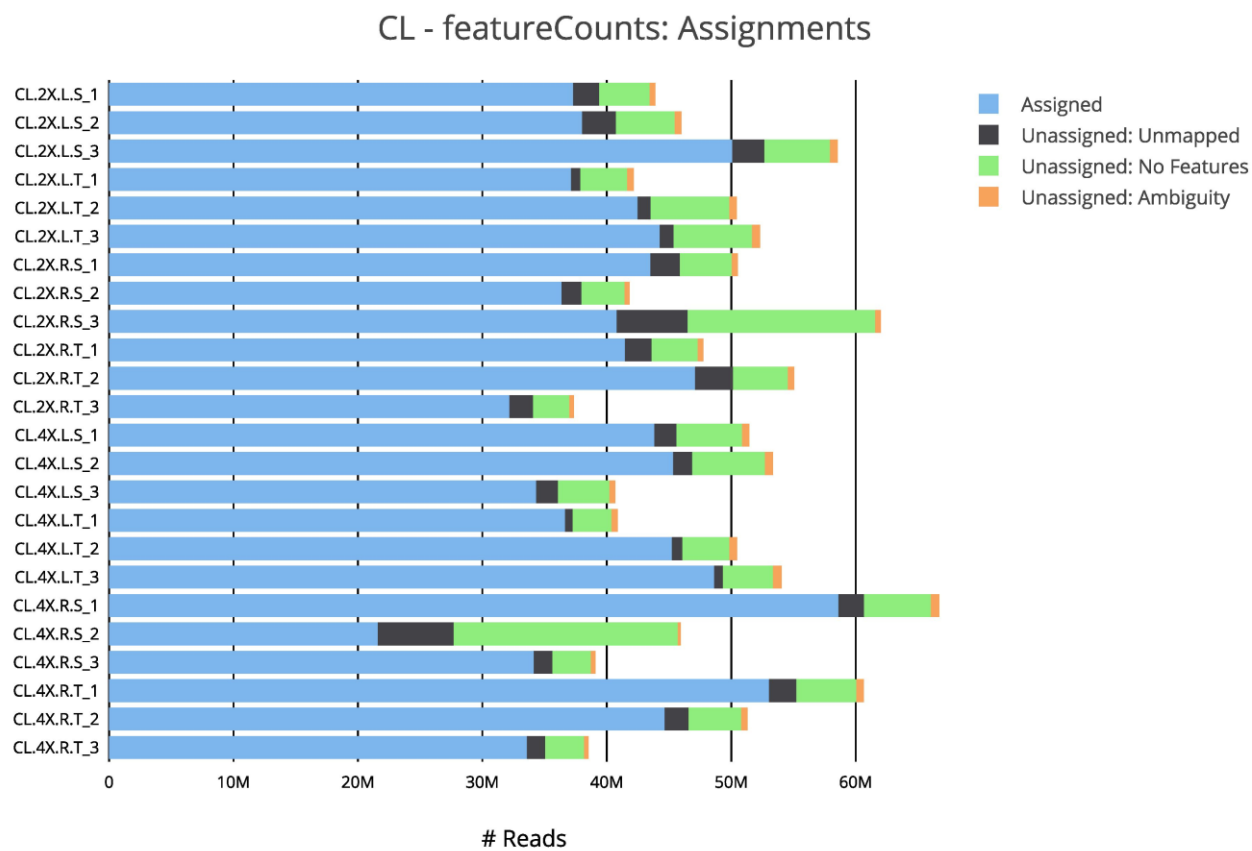

**Fig. S5. Mapping and count for Cleopatra mandarin.**

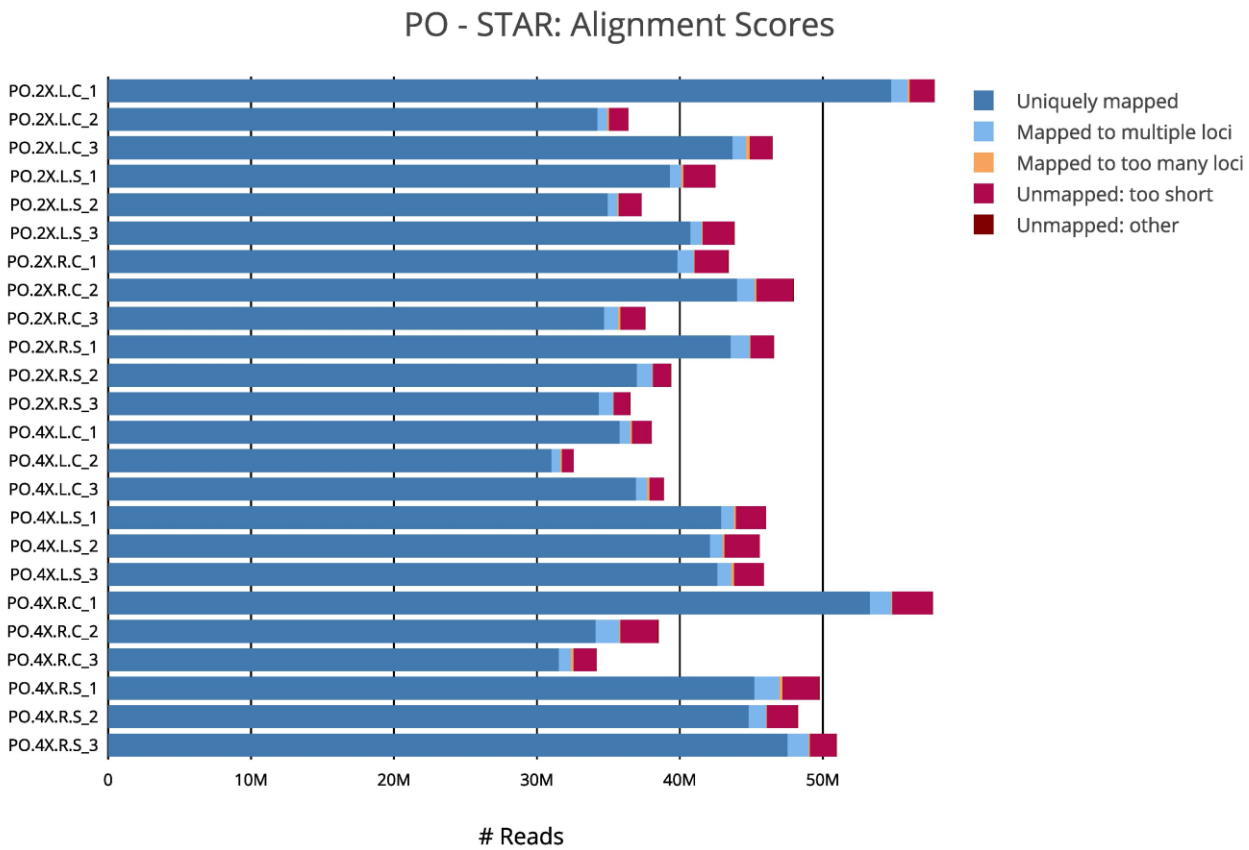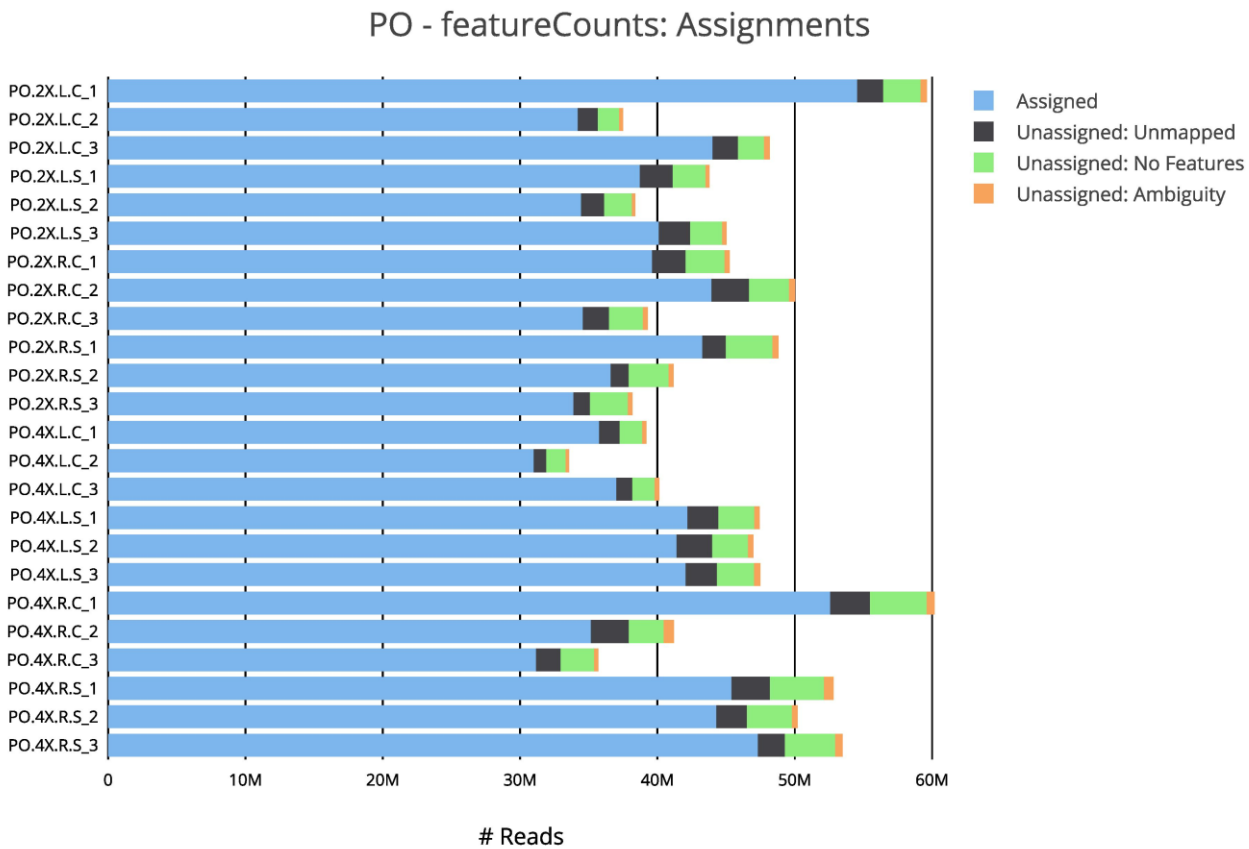

**Fig.S6. Mapping and count for Poncirus trifoliata.**

## 2.2 Supplementary Table

**Table S1.** Plant Material

| Common name               | Scientific name      | Ploidy level | Tissues samples | Number of biological replicates | ICVN*         |
|---------------------------|----------------------|--------------|-----------------|---------------------------------|---------------|
| <i>Cleopatra mandarin</i> | <i>C. reshni</i>     | 2x           | Roots<br>leaves | 3                               | ICVN-0110274  |
| <i>Trifoliate orange</i>  | <i>P. trifoliata</i> | 2x           | Roots<br>leaves | 3                               | ICVN-0110081  |
| <i>Cleopatra mandarin</i> | <i>C. reshni</i>     | 4x           | Roots<br>leaves | 3                               | ICVN-0101110  |
| <i>Trifoliate orange</i>  | <i>P. trifoliata</i> | 4x           | Roots<br>leaves | 3                               | ICVN-01011106 |

\*The first 01 in the ICVN number stands for "variety from the San Giuliano collection"; other collections around the world have a different number. The next number, always 1 or 0, means "micrografted, without pathogens= 0"; "seedling not micrografted = 1". The following numbers are the registration number in the collection.

**Table S2:** GO analysis details and Identification of genes related to theses GO terms in Poncirus trifoliata (PO) and Cleopatra mandarin (CL) 2x and 4x, in control (C) and stressed (S) conditions.

**Table S2** has been uploaded separately in xlsx format.

**Table S3.** Specific details regarding the number of reads or gigabytes per sample, the number of clean reads, and the mapping rate
