# Supplementary material for: Comparative transcriptomic analyses of diploid and tetraploid citrus reveal how ploidy level influences salt stress tolerance
Source: Front Plant Sci. 2024 Oct 30;15:1469115. doi: 10.3389/fpls.2024.1469115 (PMC11561191; doi:10.3389/fpls.2024.1469115)
Supplement: Supplementary Table S2 — GO analysis details and Identification of genes related to theses GO terms in Poncirus trifoliata (PO) and Cleopatra mandarin (CL) 2x and 4x, in control (C) and stressed (S) conditions. [file Table2.xlsx]

## Sheet: CL_LEAVES INTERACTION GENES
Gene	log2FoldChange	padj	annotation
CITRE_001g000060	0.478015768817352	0.00153579130361159	conserved hypothetical protein
CITRE_001g000830	0.40004010419592	0.00292861532199597	conserved hypothetical protein
CITRE_001g001160	0.329770082388528	0.0012243067360606	NAD(P)-bd_dom domain-containing protein
CITRE_001g001230	-0.771884202061985	2.39301381185536e-05	EDR2_C domain-containing protein
CITRE_001g001390	-0.907713733253126	2.81634620253315e-05	Dynamin-related protein 3A
CITRE_001g001420	0.684747910438632	2.39301381185536e-05	conserved hypothetical protein
CITRE_001g003270	-1.66479665224043	0.00101640331404318	Expansin-like EG45 domain-containing protein
CITRE_001g004580	0.337828543524579	0.00208559181642187	Aspartate aminotransferase
CITRE_001g005070	-0.398370862895865	0.000896396650518005	putative protein unc-13
CITRE_001g005220	-0.828206859806099	0.00047464596092125	Homeobox-leucine zipper protein ATHB-8
CITRE_001g005280	0.627629496221313	2.85101553750377e-06	Hydrolase_4 domain-containing protein
CITRE_001g005380	1.32312315448498	0.000595637775559027	Hypothetical protein
CITRE_001g005680	0.310827702583306	0.000489156702170881	conserved hypothetical protein
CITRE_001g005880	0.52321769124786	0.000219014211289976	Vacuolar-processing enzyme
CITRE_001g006130	-2.84739279151107	0.000438167779322602	conserved hypothetical protein
CITRE_001g006590	0.79431740121276	0.000270419963333646	HSF_DOMAIN domain-containing protein
CITRE_001g006850	0.536592613819424	0.000577674484962124	conserved hypothetical protein
CITRE_001g007120	-0.490351774143767	0.000144961527784762	SPX domain-containing protein
CITRE_001g008060	-1.00413996358468	0.000132877724877264	HTH myb-type domain-containing protein
CITRE_001g008960	0.947288021562651	0.000279764308906051	conserved hypothetical protein
CITRE_001g009180	-0.895979284389353	7.73899785841472e-05	HSF_DOMAIN domain-containing protein
CITRE_001g009570	4.68723674438238	6.12284705476561e-07	conserved hypothetical protein
CITRE_001g009640	0.345682297035757	0.000231497216794887	Peroxisomal fatty acid beta-oxidation multifunctional protein AIM1
CITRE_001g009740	1.47317551285584	8.65634372524689e-11	Protein NRT1/ PTR FAMILY 1.2
CITRE_001g009770	-0.541017809515604	0.000177656623953564	BHLH domain-containing protein
CITRE_001g009940	0.805968495521559	1.60516289714529e-05	Hypothetical protein
CITRE_001g009960	0.609432431043111	0.00247904746475073	Hypothetical protein
CITRE_001g010040	0.573370782817153	1.62764301904203e-05	MFS domain-containing protein
CITRE_001g010290	-0.591884672100621	0.00108381110932511	conserved hypothetical protein
CITRE_001g010300	-0.303753515236015	0.0021388961625844	Golgin candidate 1
CITRE_001g010710	2.53037981178012	0.000908345852440208	Pectinesterase
CITRE_001g011450	0.515414272751878	0.000595637775559027	conserved hypothetical protein
CITRE_001g011540	0.535257321779944	0.000896396650518005	putative Deoxyhypusine synthase
CITRE_001g011780	-0.434042148719972	0.000508493984275437	putative protein EFFECTOR OF TRANSCRIPTION 2
CITRE_001g012120	0.335396137961433	0.000224467829454331	putative Thioredoxin domain-containing protein
CITRE_001g012160	-0.304348833477672	0.00125958537669209	PCI domain-containing protein
CITRE_001g012390	-1.2160523336731	0.000239533298937682	Protein kinase domain-containing protein
CITRE_001g013430	0.558638155814908	0.000143966577607364	putative calcium-binding protein CML27
CITRE_001g013490	4.90985136935963	2.85101553750377e-06	Homeobox domain-containing protein
CITRE_001g013500	1.06835071792069	7.43470579230716e-05	O-fucosyltransferase family protein
CITRE_001g013540	0.551203179301861	0.0010158445620806	conserved hypothetical protein
CITRE_001g013570	1.32139353037345	9.35115406580905e-05	Hypothetical protein
CITRE_001g013650	0.54357500197053	0.000109963992708037	C2 domain-containing protein
CITRE_001g013820	0.366263827920184	0.00234786587312534	conserved hypothetical protein
CITRE_001g013960	0.478555912193659	2.38933535295653e-05	conserved hypothetical protein
CITRE_001g014690	0.624088074611088	1.27211029212101e-05	VOC domain-containing protein
CITRE_001g014920	0.735604094596444	8.95753624456222e-05	Protein DETOXIFICATION
CITRE_001g015630	0.537415373903937	0.00108381110932511	tRNA dimethylallyltransferase 9
CITRE_001g015850	4.27935024589816	0.000588808224812548	BZIP domain-containing protein
CITRE_001g015870	0.783301744884121	1.24260485328323e-07	Homogentisate 1%2C2-dioxygenase
CITRE_001g016180	-3.31031962357391	0.00103434265589752	Homeobox domain-containing protein
CITRE_001g017480	0.449144483580578	6.06156657615157e-05	Thioredoxin domain-containing protein
CITRE_001g017700	0.552291665571837	0.00021167864717947	CBS domain-containing protein
CITRE_001g017790	-1.26684933566133	0.000307869283884977	putative COP1-interacting protein 7
CITRE_001g018060	0.423885469928482	0.000947158336504985	putative protein LAZ1
CITRE_001g018460	0.449916232976605	2.81634620253315e-05	Cyclic nucleotide-gated ion channel 4
CITRE_001g021190	0.620013407063636	0.000893879629787827	Thiamine thiazole synthase%2C chloroplastic
CITRE_001g021320	0.601460941005067	2.16153429664581e-06	LRRNT_2 domain-containing protein
CITRE_001g022390	0.839804729982813	6.06156657615157e-05	putative folate-biopterin transporter 4
CITRE_001g022650	-0.881186183147481	0.00132954045490669	PGG domain-containing protein
CITRE_001g023290	0.837923260595733	0.000752862974190552	putative folate-biopterin transporter 4
CITRE_001g023630	0.651706012061028	2.48625704757851e-07	putative 1-acyl-sn-glycerol-3-phosphate acyltransferase
CITRE_001g023640	0.537616296289334	0.000747965708511472	putative 1-acyl-sn-glycerol-3-phosphate acyltransferase
CITRE_001g023790	0.424079989641194	0.00133606604732799	Calcium-dependent protein kinase 33
CITRE_001g023800	0.856884328961047	0.00125496527474102	putative Calcium-dependent protein kinase 9
CITRE_001g023810	0.80108759400634	0.00176086607764308	putative Calcium-dependent protein kinase 9
CITRE_001g024190	1.21519139188577	0.000138386950995815	SUI1 domain-containing protein
CITRE_001g024220	0.396209204351859	0.00250551098959055	conserved hypothetical protein
CITRE_001g024300	-0.70762004340945	2.43065783619378e-05	Hexosyltransferase
CITRE_001g024840	0.694276032121069	0.000252078754900033	conserved hypothetical protein
CITRE_001g025320	0.38175691550493	0.00195898519931739	Chloroplastic import inner membrane translocase subunit TIM22-2
CITRE_001g025950	0.346050220526336	8.56164476696173e-05	conserved hypothetical protein
CITRE_001g026000	-1.6412206512429	4.17095252748158e-05	conserved hypothetical protein
CITRE_001g026130	-0.416460109171148	0.000896117978535072	DEK C-terminal domain-containing protein
CITRE_001g026190	-0.684684008466793	0.000213442212128981	Fasciclin-like arabinogalactan protein 1
CITRE_001g026530	0.83302234783234	3.84405575506671e-11	Cellulose synthase-like protein E6
CITRE_001g026760	0.4557880668113	5.7776750466752e-06	conserved hypothetical protein
CITRE_001g027930	0.434124500393951	0.000926183052668704	N-acetyltransferase domain-containing protein
CITRE_001g028030	0.706094976325124	4.03369207115408e-07	Cysteine protease Cp
CITRE_001g028130	-1.24796582612708	7.95968913114347e-06	Str_synth domain-containing protein
CITRE_001g028340	0.507571169235498	1.68987864529165e-07	Oligouridylate-binding protein 1
CITRE_001g028940	4.02154694550484	4.37794909152344e-05	Pectinesterase
CITRE_001g029000	-1.9317293140031	0.000780920733335781	conserved hypothetical protein
CITRE_001g029040	-0.370915704228543	0.002476335993903	putative FYVE-type domain-containing protein
CITRE_001g029050	0.443378550195563	1.65364335871953e-06	Tify domain-containing protein
CITRE_001g029060	0.34542588612211	0.000282692790492756	Protein FATTY ACID EXPORT 2%2C chloroplastic
CITRE_001g029380	0.408064463680946	0.000479349407950396	YGGT family protein
CITRE_001g030200	4.14441215444402	0.00105324127216336	AAI domain-containing protein
CITRE_001g030700	0.643968996411876	2.39019984514008e-08	Aha1_N domain-containing protein
CITRE_001g030720	0.503097335159283	2.69613411956848e-05	MFS domain-containing protein
CITRE_001g031180	0.770803332983446	0.000118916835442895	FLZ-type domain-containing protein
CITRE_001g031300	-0.848213693519675	0.000839752364169949	putative Galacturonokinase
CITRE_001g031310	-0.983969856513915	3.9895386075778e-08	putative Galacturonokinase
CITRE_001g031380	0.588362677228632	7.42292867693564e-05	Bifunctional lysine-specific demethylase and histidyl-hydroxylase
CITRE_001g031500	-0.405475493610585	8.04019722680405e-12	Calcium-transporting ATPase
CITRE_001g031590	-0.83454598299855	0.00126636986145071	Clp R domain-containing protein
CITRE_001g031830	0.449221883388362	0.000896396650518005	Rab-GAP TBC domain-containing protein
CITRE_001g032140	0.484791010776899	0.000705206414781884	NifU-like protein 3%2C chloroplastic
CITRE_001g033000	0.59840046100201	0.00124752940293258	Glycosyltransferase
CITRE_001g033040	0.617576388526186	1.53477095442767e-08	Xylose isomerase
CITRE_001g033250	0.333325195372616	0.00056597685046487	diacylglycerol kinase
CITRE_001g033310	0.728861346266252	3.80445953167043e-05	Alpha%2Calpha-trehalose-phosphate synthase [UDP-forming] 6
CITRE_001g034350	1.25001723970457	4.17251115925417e-07	Shikimate O-hydroxycinnamoyltransferase
CITRE_001g034570	0.211733120889696	0.0008351167248048	SRP54 domain-containing protein
CITRE_001g034620	0.550732527868476	0.0010158445620806	1-acyl-sn-glycerol-3-phosphate acyltransferase
CITRE_001g034840	0.452320131770269	0.00120490324944454	Metallophos domain-containing protein
CITRE_001g035240	-0.440994389040027	0.000839860094759834	START domain-containing protein
CITRE_001g035510	-0.637192447249425	9.07993556191593e-05	conserved hypothetical protein
CITRE_002g000250	6.80243876700632	0.000350454723093879	Subtilisin-like protease SBT3.18
CITRE_002g000910	0.723486121862097	0.000431198855796156	Senescence-specific cysteine protease SAG12
CITRE_002g001010	0.291878751755323	8.68155038560638e-05	Serine/threonine-protein phosphatase PP2A-4 catalytic subunit
CITRE_002g001100	0.378403410572305	1.76855527396585e-05	conserved hypothetical protein
CITRE_002g002780	-2.31554764296143	9.95695991510128e-05	Hypothetical protein
CITRE_002g003680	1.70059577745738	7.82533952261041e-05	Protein kinase domain-containing protein
CITRE_002g004160	0.644545103712267	1.83775931900304e-05	Dicarboxylate transporter 1%2C chloroplastic
CITRE_002g004680	3.40356461630091	0.000486543804523287	ABC transporter domain-containing protein
CITRE_002g004930	1.48747078331867	2.58795742497467e-07	LRRNT_2 domain-containing protein
CITRE_002g005720	-11.9562210953723	0.00273716614557836	Methanol O-anthraniloyltransferase
CITRE_002g005840	-1.40475814624986	4.09703173410951e-06	Hypothetical protein
CITRE_002g005880	0.36286004803489	0.000866817921952939	Signal peptide peptidase
CITRE_002g006120	0.702298078246208	2.70231775951716e-05	Protein CLT1%2C chloroplastic
CITRE_002g006570	0.576669334047496	3.22401386598673e-05	Cysteine proteinase inhibitor
CITRE_002g006970	-0.625518675724549	2.83688130596291e-05	5-methyltetrahydropteroyltriglutamate--homocysteine S-methyltransferase
CITRE_002g007430	1.05758448692119	8.01863237561796e-09	UBC core domain-containing protein
CITRE_002g007750	0.68661628465252	1.43573026277678e-11	Formate dehydrogenase%2C mitochondrial
CITRE_002g007860	-2.45326423066071	1.76594094770054e-09	Peroxidase
CITRE_002g009750	0.405832488236561	0.0010158445620806	Molybdopterin biosynthesis protein CNX1
CITRE_002g009900	0.880758897415018	9.53507384978546e-11	J domain-containing protein
CITRE_002g011350	-0.32620194032922	0.000398993410414395	Auxin response factor
CITRE_002g011570	0.582581046995929	0.000193574898133059	Tyrosine--tRNA ligase
CITRE_002g013080	2.47634627255162	0.000177491379154523	conserved hypothetical protein
CITRE_002g014000	0.551212191859789	9.18259020540318e-05	Adenylate kinase
CITRE_002g014020	2.00352510634543	0.00123070571412037	Protein kinase domain-containing protein
CITRE_002g014030	0.567400646359113	8.44228000706451e-05	conserved hypothetical protein
CITRE_002g014130	1.13765838126132	0.000119856288700294	Mitochondrial pyruvate carrier
CITRE_002g015020	-0.430513177203963	0.000250688280696853	Uncharacterized membrane protein At3g27390
CITRE_002g015600	0.688531382834549	4.29455250161175e-06	Squamosa promoter-binding protein 2
CITRE_002g016030	1.12816386529415	2.834680093527e-16	BHLH domain-containing protein
CITRE_002g016270	-0.453323563414383	0.000488546195011788	1%2C3-beta-glucan synthase
CITRE_002g016590	5.33995706592428	5.83205442605634e-06	conserved hypothetical protein
CITRE_002g017410	0.383441186751425	0.000415109516182614	conserved hypothetical protein
CITRE_002g019020	-2.30527757196782	0.000913278501257868	Phytocyanin domain-containing protein
CITRE_002g020080	0.437898660924014	0.000271118728042434	DLH domain-containing protein
CITRE_002g020720	0.507533929465217	0.000896396650518005	Zinc finger CCCH domain-containing protein 3
CITRE_002g020750	0.54752680685096	0.000743158441507494	conserved hypothetical protein
CITRE_002g021090	0.726019705678169	8.8001925750569e-05	conserved hypothetical protein
CITRE_002g021370	-0.63522131618882	6.14655187177162e-06	conserved hypothetical protein
CITRE_002g021500	-1.88490871480889	0.000789932113611134	Thymidine kinase
CITRE_002g021530	0.69330797502594	0.000912310063579667	Protein kinase domain-containing protein
CITRE_002g022650	0.79614787175487	9.31735001294686e-05	Nitrile-specifier protein 5
CITRE_002g022970	-0.972833410760394	0.000469724574059081	Uncharacterized membrane protein At3g27390
CITRE_002g023170	2.49842041677321	1.05182586963593e-07	putative Heavy metal-associated isoprenylated plant protein 16
CITRE_002g023710	0.514249334875363	4.92522978880087e-06	Peroxin-13
CITRE_002g023910	3.05636162366496	0.00657129842898049	Glycosyltransferase
CITRE_002g023960	1.45391526276425	4.58915029091011e-08	putative Mogroside IE synthase
CITRE_002g023970	1.46648933013702	6.4912110150881e-17	putative UDP-glycosyltransferase 74G1
CITRE_002g024970	-1.25375378191331	1.79114087570827e-05	Protein kinase domain-containing protein
CITRE_002g025340	0.566575801247667	0.000334955423287016	Potassium transporter
CITRE_002g025460	-0.876299347323729	4.74167289894255e-05	C2H2-type domain-containing protein
CITRE_002g025820	-0.759131566706418	4.47027503582183e-08	Histidine kinase
CITRE_002g026600	0.675501923884016	0.000282789856043457	F-box domain-containing protein
CITRE_002g026750	2.75544891856325	3.08834360311125e-07	PMEI domain-containing protein
CITRE_002g026950	0.819391219795762	0.000592538378336924	Bet_v_1 domain-containing protein
CITRE_002g027080	-0.702134845065317	2.3625519877687e-05	STAS domain-containing protein
CITRE_002g027170	0.719065349981529	2.14661855119409e-06	Carboxypeptidase
CITRE_002g028030	-0.916335072439514	1.35473079779999e-06	PPDK_N domain-containing protein
CITRE_002g028080	1.19883606580231	1.10032319968293e-11	putative zinc finger protein At1g68190
CITRE_002g028700	0.857135598853782	0.000212424361409296	conserved hypothetical protein
CITRE_002g029150	0.6572240133631	0.000496471324321656	FeThRed_A domain-containing protein
CITRE_002g029290	0.832278405279916	0.000106244548406688	putative Acetolactate synthase small subunit 1%2C chloroplastic
CITRE_002g029340	0.381968293273153	0.000700165423369066	Beta-glucosidase 42
CITRE_002g030070	0.645315721604355	0.000343500993610859	putative Allantoate deiminase 2
CITRE_002g030410	4.30160403814341	9.51569603629103e-07	PGG domain-containing protein
CITRE_002g030420	2.97651935100378	0.000431198855796156	conserved hypothetical protein
CITRE_002g030880	-0.62581061031637	0.000147682909478503	Protein PHLOEM PROTEIN 2-LIKE A1
CITRE_002g031060	0.716526315113492	3.1089650771324e-06	BTB domain-containing protein
CITRE_002g031590	0.474584865972447	0.000122949306395393	Protein LSD1
CITRE_002g031690	0.823230981411815	1.08331800144259e-15	ALOG domain-containing protein
CITRE_002g032250	-3.11657429172575	4.74167289894255e-05	FAD-binding PCMH-type domain-containing protein
CITRE_002g032760	-1.58065555135163	0.00026604550007332	AA_permease_C domain-containing protein
CITRE_002g032810	-0.620467871805106	3.7028466540028e-05	ABC-type xenobiotic transporter
CITRE_002g032970	-0.673478069562097	8.11776016451004e-10	Auxin response factor
CITRE_002g033390	0.626222302427346	0.000317271419155001	Protease Do-like 5%2C chloroplastic
CITRE_002g033650	4.63691530741967	0.000154186470288632	Cytochrome P450 77A3
CITRE_002g034230	-5.10584117686691	0.000384206158553232	Gnk2-homologous domain-containing protein
CITRE_002g034440	-0.799518557354724	8.78828273218385e-05	conserved hypothetical protein
CITRE_002g034930	0.473475894465018	0.000964176446860818	Riboflavin kinase
CITRE_002g036350	0.639973896256682	1.05727746227754e-05	AP2/ERF domain-containing protein
CITRE_002g036380	0.529198637595386	0.000789932113611134	putative protein DEHYDRATION-INDUCED 19
CITRE_002g036820	5.20048611855231	3.87772629713424e-10	GDSL esterase/lipase At5g45950
CITRE_002g037180	0.706331740622052	2.69573964840338e-07	conserved hypothetical protein
CITRE_002g037400	-0.475366808659812	0.000269888632735533	Protein SCAR
CITRE_002g037810	0.534871705494711	0.000284485614009285	Alpha%2Calpha-trehalose-phosphate synthase [UDP-forming] 5
CITRE_002g039290	0.6900983368552	6.55811207293309e-15	conserved hypothetical protein
CITRE_002g039360	0.506766889187506	0.000150254379305849	F-box domain-containing protein
CITRE_002g039920	-1.37674122009657	0.00055016502165523	Aspartic proteinase
CITRE_002g040070	-1.08636105948669	6.18647225625741e-07	Protein kinase domain-containing protein
CITRE_002g041090	-0.704199803311662	0.000101625685604449	conserved hypothetical protein
CITRE_003g000040	-1.13873240255997	0.00229743950390282	Protein kinase domain-containing protein
CITRE_003g000300	-2.41659568268198	4.68003532969701e-09	HMA domain-containing protein
CITRE_003g000410	-2.07954065218362	0.000703320198842511	putative Pyruvate dehydrogenase E1 component subunit alpha
CITRE_003g000700	0.413618522361464	5.75016492471159e-05	Mediator of RNA polymerase II transcription subunit 10
CITRE_003g001340	0.591823484343392	4.51895882510875e-05	conserved hypothetical protein
CITRE_003g001400	-2.9321007943155	0.000822634624840086	Calcineurin B-like protein 7
CITRE_003g001540	0.66654433389947	3.80445953167043e-05	NAD(P)H-quinone oxidoreductase subunit S%2C chloroplastic
CITRE_003g001770	0.399082537934765	2.06268044728011e-05	conserved hypothetical protein
CITRE_003g001950	0.733731075265901	1.62764301904203e-05	Mitochondrial adenine nucleotide transporter ADNT1
CITRE_003g002300	0.536182807699129	0.00028072800923844	putative GDT1 family protein
CITRE_003g002690	0.540105460899728	0.000331834277946013	S10_plectin domain-containing protein
CITRE_003g002780	-2.34563437842451	0.000610470906913323	Beta-carotene 3-hydroxylase
CITRE_003g003260	0.581602066218771	0.000479204085299495	5-amino-6-(5-phospho-D-ribitylamino)uracil phosphatase%2C chloroplastic
CITRE_003g003610	-0.497401008104672	0.000279764308906051	NAP1-related protein 2
CITRE_003g004020	-0.3815207034029	0.000361671559055419	Homeobox domain-containing protein
CITRE_003g004540	0.403093868565202	0.00130065081683585	Transcription factor MYB1R1
CITRE_003g005100	0.394208495476857	3.52967172330616e-05	RING-type E3 ubiquitin transferase
CITRE_003g005270	0.374421851491159	0.00144817555330795	Ribosomal RNA-processing protein 40
CITRE_003g005490	0.381305291745312	0.0017545493275483	conserved hypothetical protein
CITRE_003g005550	0.519238067896635	0.000225148917232393	putative Anthranilate phosphoribosyltransferase%2C chloroplastic
CITRE_003g006810	-3.52796352754889	9.31682115801341e-08	Peptidase C1A subfamily protein
CITRE_003g006830	-0.851938394446052	3.17076962386976e-14	BTB domain-containing protein
CITRE_003g007000	0.381836675700214	0.00157811771877768	conserved hypothetical protein
CITRE_003g007570	-0.497194896051548	2.95970889261487e-06	Argininosuccinate synthase
CITRE_003g008550	0.422299276810851	0.00188955815112731	Ras-related protein RABD2a
CITRE_003g008790	-1.27313140955773	0.00014928444279705	Receptor-like serine/threonine-protein kinase
CITRE_003g009190	1.45261298874334	2.64412570294279e-11	Hypothetical protein
CITRE_003g009550	-0.719529644591428	0.000533330670291604	putative glucuronosyltransferase PGSIP8
CITRE_003g010260	-1.11375388324295	2.37236387675142e-07	PMEI domain-containing protein
CITRE_003g010520	0.33635673575233	1.20269222881057e-06	conserved hypothetical protein
CITRE_003g010530	0.363868755972549	0.000939037440901507	S-acyltransferase
CITRE_003g010690	-1.38088600694196	0.000926790719200579	conserved hypothetical protein
CITRE_003g010900	1.06201601071452	1.93617866615516e-07	Geraniol 8-hydroxylase
CITRE_003g010910	0.983149125007846	3.32666385207008e-11	Geraniol 8-hydroxylase
CITRE_003g011220	-0.448820377534728	0.000947219511911628	Homeobox protein HD1
CITRE_003g011400	0.314278787585682	0.00130061446931541	RanBD1 domain-containing protein
CITRE_003g011750	0.789324494082928	6.76091117978972e-10	Heat stress transcription factor B-2b
CITRE_003g012620	1.06873596857206	6.45774239598875e-20	putative protein SIEVE ELEMENT OCCLUSION B
CITRE_003g013220	0.460460370096637	0.0010158445620806	Protein CANDIDATE G-PROTEIN COUPLED RECEPTOR 2
CITRE_003g014270	-0.865461729879724	2.9022058643879e-05	1-phosphatidylinositol 4-kinase
CITRE_003g015660	0.453676928653073	0.00089182415901036	conserved hypothetical protein
CITRE_003g016770	1.15149219626861	0.00171216638505923	Protein kinase domain-containing protein
CITRE_003g019480	3.28711916443916	1.76855527396585e-05	Hypothetical protein
CITRE_003g019680	-3.7382858532129	0.000905070636162037	conserved hypothetical protein
CITRE_003g019830	-1.75922227379221	0.000193574898133059	conserved hypothetical protein
CITRE_003g019870	0.364491643357605	0.00141421028452589	conserved hypothetical protein
CITRE_003g020260	-0.75994642540588	1.72355299838477e-05	Alpha%2Calpha-trehalose-phosphate synthase (UDP-forming)
CITRE_003g020550	0.685522614231456	0.00169035158717942	putative protein SRG1
CITRE_003g020630	-3.29556804532561	0.00043158386409725	putative protein SRG1
CITRE_003g021160	0.779278458821754	4.93256829965175e-05	Cytochrome P450 CYP72A219
CITRE_003g022420	-0.736542122686901	0.000533330670291604	conserved hypothetical protein
CITRE_003g023230	-1.0510239778959	9.62347617781401e-09	RING-type domain-containing protein
CITRE_003g023370	0.369049961583025	0.0012009472492282	CS domain-containing protein
CITRE_003g023620	-2.5245319591168	0.00620936267382444	Structural maintenance of chromosomes flexible hinge domain-containing protein GMI1
CITRE_003g024760	1.00228966941206	1.00035336588877e-05	putative Membrane protein of ER body-like protein
CITRE_003g024910	0.447765462936602	0.000405591671759636	Rhodanese domain-containing protein
CITRE_003g024930	1.92495788576434	0.00132954045490669	putative Cytochrome P450 736A117
CITRE_003g025240	-0.38667811978501	0.000790331381871717	conserved hypothetical protein
CITRE_003g025400	0.543110238125053	0.00113471239726645	60S acidic ribosomal protein P1
CITRE_003g025410	0.896665823537994	0.000791218904676992	conserved hypothetical protein
CITRE_003g025580	0.901800454636315	6.65661676583254e-06	Fe2OG dioxygenase domain-containing protein
CITRE_003g025810	-0.68871154712444	5.96116659342786e-08	NAC domain-containing protein
CITRE_003g025930	0.519177266972201	0.000296949267476091	Glycerophosphocholine acyltransferase 1
CITRE_003g026630	-1.05011581596874	0.000125656725149319	C2H2-type domain-containing protein
CITRE_003g027190	0.664098772140084	0.000560898853686	conserved hypothetical protein
CITRE_003g028570	-1.33529439120605	7.8867395973909e-05	Chlorophyllase
CITRE_003g029160	0.460194631222603	0.000237195022806513	Cytochrome c domain-containing protein
CITRE_003g029290	0.412857968711829	0.000840529205760389	conserved hypothetical protein
CITRE_003g029630	0.343854419745922	0.00183769567017885	AIG1-type G domain-containing protein
CITRE_003g030100	-0.476152633775884	2.35490903609615e-06	Elongation factor 1-gamma
CITRE_003g030190	0.620658361958383	3.81649778770932e-05	12-oxophytodienoate reductase
CITRE_003g031310	0.511404848482346	0.000722638930103686	conserved hypothetical protein
CITRE_003g031680	0.749837931452262	7.90531999938668e-05	Gamma-glutamylcyclotransferase family protein
CITRE_003g033060	-1.147989060167	0.00168921958170583	putative Glutamine synthetase
CITRE_003g035530	0.710355537217118	2.21926998119759e-05	RanBP2-type domain-containing protein
CITRE_003g035850	-0.553258119026442	0.000947158336504985	F-box domain-containing protein
CITRE_003g037490	1.51215331727766	2.74572266368555e-14	putative 2-alkenal reductase (NADP(+)-dependent)
CITRE_003g037580	-0.514296822490464	0.000284485614009285	Peptidase_S9 domain-containing protein
CITRE_003g037950	0.93643034280459	1.4146339296214e-08	Glycosyltransferase
CITRE_003g039110	0.414158058942719	0.00207653749258128	putative Mitogen-activated protein kinase
CITRE_003g040570	2.64245850817342	0.00137279544888947	Glyco_hydro_19_cat domain-containing protein
CITRE_003g040580	2.75787723637567	0.000705206414781884	Glyco_hydro_19_cat domain-containing protein
CITRE_003g040760	0.409805571104398	0.00122008338533712	conserved hypothetical protein
CITRE_003g043210	0.322866659692282	9.00622699996274e-05	Protein farnesyltransferase/geranylgeranyltransferase type-1 subunit alpha
CITRE_003g043230	0.580837113683922	9.51569603629103e-07	conserved hypothetical protein
CITRE_003g043310	0.876090947018804	0.000435895239158495	conserved hypothetical protein
CITRE_003g043740	4.69203495862967	3.81649778770932e-05	WW domain-containing protein
CITRE_003g043970	3.56537734163512	7.33258118842136e-05	conserved hypothetical protein
CITRE_003g044270	0.346268168394927	0.000885968520624164	4-coumarate-CoA ligase
CITRE_003g044590	0.386517737674797	7.42964208253661e-05	RRM domain-containing protein
CITRE_003g044820	0.594424552252797	0.000126091441443741	Protein kinase domain-containing protein
CITRE_003g045740	0.682539424880001	0.00103434265589752	conserved hypothetical protein
CITRE_003g045990	0.545069717727022	2.73670430515535e-07	Thioredoxin domain-containing protein
CITRE_003g046050	0.843999751713505	7.75234669284893e-05	Hypothetical protein
CITRE_003g046080	1.17475832470092	2.70231775951716e-05	Hypothetical protein
CITRE_003g046650	0.87999416713335	0.000679355301064954	Arabinogalactan protein 14
CITRE_003g046700	0.41090340126262	0.00063028361265022	Tubulin alpha-3 chain
CITRE_003g047140	0.588223950920344	3.68845282588148e-05	UBC core domain-containing protein
CITRE_003g047520	0.325719755764292	0.00255521677297891	Exosome complex component RRP41
CITRE_003g047550	0.408978193719333	0.00164829759486392	GTP cyclohydrolase 1
CITRE_003g047600	1.62963109244087	1.03830688146532e-05	putative Dimethylnonatriene synthase
CITRE_003g047810	-1.45583782596618	0.00110096926837152	Methionine--tRNA ligase
CITRE_003g048120	0.693355340401475	0.000947219511911628	PPPDE domain-containing protein
CITRE_003g048160	-0.941504116279579	0.00175566212331255	conserved hypothetical protein
CITRE_003g048330	0.301546008705155	0.00100676900918837	3-ketoacyl CoA thiolase 1%2C peroxisomal
CITRE_003g048400	0.460317208737052	0.000140246336423323	Alcohol dehydrogenase
CITRE_003g048890	-0.259802919923386	0.000431120654707406	ABC-type xenobiotic transporter
CITRE_003g048900	0.252350316520808	0.00163183532788382	NmrA domain-containing protein
CITRE_003g049620	-1.82507528445216	0.000307869283884977	NAC domain-containing protein
CITRE_003g050500	0.542777496055777	0.000617232617369038	PRK domain-containing protein
CITRE_003g050540	0.24435809435993	0.00343497239809517	NADH dehydrogenase [ubiquinone] flavoprotein 2%2C mitochondrial
CITRE_003g050570	0.334369248689196	0.00200792482436082	Tryptophan synthase alpha chain%2C chloroplastic
CITRE_003g050910	0.804013720080084	0.000270700154080336	HSF_DOMAIN domain-containing protein
CITRE_003g050960	0.592689219328198	2.68334702632446e-05	BIG SEEDS 1
CITRE_003g052370	0.512200595883566	0.000495114245706523	conserved hypothetical protein
CITRE_003g052690	-1.99654543156648	0.000315997700312524	Peroxidase
CITRE_003g053180	-4.54080994520966	0.00050802778908295	C2H2-type domain-containing protein
CITRE_003g053450	0.425057744452028	0.000279286502493728	conserved hypothetical protein
CITRE_003g053850	-0.782645778937847	0.000723884054875293	UDP-glucuronate decarboxylase
CITRE_003g054070	0.871302331862404	1.07915078076092e-06	Indole-3-acetic acid-induced protein ARG2
CITRE_003g054080	0.687505590482399	0.000144961527784762	conserved hypothetical protein
CITRE_003g054100	0.815406190594094	2.0648995777228e-08	conserved hypothetical protein
CITRE_003g054290	2.28622225841818	8.85821338460202e-05	Endoglucanase
CITRE_003g054400	0.603864016911998	4.11159288830931e-05	Histidine kinase domain-containing protein
CITRE_003g054430	1.82708250000111	8.21583651213478e-89	J domain-containing protein
CITRE_003g054770	0.386300217586583	7.98479897662756e-06	Protein disulfide-isomerase
CITRE_003g055900	1.09366293265696	1.98229471533632e-09	conserved hypothetical protein
CITRE_003g056980	3.12255227382741	0.000111490853534865	putative Anthranilate N-methyltransferase
CITRE_003g057200	-2.06498656065464	0.00126402756118698	conserved hypothetical protein
CITRE_003g057560	0.525432651762977	0.0005033398041917	RING-type E3 ubiquitin transferase
CITRE_003g058720	-0.424008667287677	0.0012701677214676	Glycos_transf_1 domain-containing protein
CITRE_003g058860	-0.59532241715475	3.81649778770932e-05	putative Golgin candidate 3
CITRE_003g060110	0.984512141979757	5.70406882737368e-09	putative (+)-neomenthol dehydrogenase
CITRE_003g060430	0.427939871034084	0.000711875632243782	Peroxisomal membrane protein 11C
CITRE_003g061260	0.622827880596499	9.56808995572706e-05	Protein kinase domain-containing protein
CITRE_003g062500	0.516097176274775	0.00134066512384967	Ras-related protein RABD2a
CITRE_003g062970	0.9534521465213	6.99717916294863e-14	Very-long-chain aldehyde decarbonylase CER1
CITRE_004g000540	-1.28667432005288	3.7028466540028e-05	LIM zinc-binding domain-containing protein
CITRE_004g001260	-0.744517104007461	0.000905070636162037	putative Uncharacterized acetyltransferase At3g50280
CITRE_004g001340	0.324710710074475	0.00125574956605041	Eukaryotic translation initiation factor 3 subunit F
CITRE_004g002030	-0.910261861860936	0.000298536852662664	APC1_C domain-containing protein
CITRE_004g003100	1.14186308160851	1.24992509147899e-09	conserved hypothetical protein
CITRE_004g003400	1.09233971905947	0.00011373847992634	putative Cytochrome P450 82A4
CITRE_004g003500	1.73803914299917	0.000206120354215908	putative Expansin-A8
CITRE_004g003830	1.43432291786359	0.000885308001133722	Hypothetical protein
CITRE_004g003870	0.637619822593413	1.33982414912067e-05	WRKY domain-containing protein
CITRE_004g004580	0.926153093668109	1.33252047342713e-09	Heat shock 70 kDa protein 1
CITRE_004g005570	1.13014129361826	2.40542612841413e-07	conserved hypothetical protein
CITRE_004g005620	-0.897165849867548	0.000502552880892892	Glutathione S-transferase
CITRE_004g005840	0.454443048599979	0.000836091192788102	Ankyrin repeat-containing protein ITN1
CITRE_004g005990	0.590025278177726	1.08186757283076e-05	Hypothetical protein
CITRE_004g006510	3.55947812698671	0.00026651142722418	LOB domain-containing protein
CITRE_004g006580	0.770020751747576	0.00081834643693107	putative Sodium/hydrogen exchanger 6
CITRE_004g006590	0.705873648908957	0.00138050460358348	conserved hypothetical protein
CITRE_004g006870	0.403573566697254	0.0014699460852493	UBC core domain-containing protein
CITRE_004g007010	-1.77791099692752	0.00131639073283376	conserved hypothetical protein
CITRE_004g008100	0.595682456048219	0.000690741515555659	putative Thioredoxin-like 3-2%2C chloroplastic
CITRE_004g009010	-1.42830019859745	0.000616207043083812	conserved hypothetical protein
CITRE_004g009480	0.484955850828688	0.00095599220789846	conserved hypothetical protein
CITRE_004g009530	0.518891070131914	0.000561024061652619	Phytol kinase 1%2C chloroplastic
CITRE_004g009810	-0.387897822258488	0.000400317930648625	Pyruvate kinase
CITRE_004g010410	0.446876323246287	7.27141682844788e-05	OTU domain-containing protein
CITRE_004g010430	-0.670388635993629	0.000708889681509288	ENDO3c domain-containing protein
CITRE_004g010500	0.719648018985375	0.000229158274854053	hypothetical protein
CITRE_004g010790	0.594981865535905	3.37907166567465e-05	Alkaline/neutral invertase
CITRE_004g011840	-0.364426332988421	0.00144817555330795	Longin domain-containing protein
CITRE_004g012000	1.04006332607076	1.27211029212101e-05	conserved hypothetical protein
CITRE_004g012800	1.30503688468875	5.44600865157882e-12	S5A_REDUCTASE domain-containing protein
CITRE_004g013110	-0.450516790249771	0.00026651142722418	putative DNA gyrase subunit A%2C chloroplastic/mitochondrial
CITRE_004g014460	-1.00759060303449	0.000704518224773025	Beta-amyrin 11-oxidase
CITRE_004g014490	0.514267975574859	0.00130065081683585	conserved hypothetical protein
CITRE_004g014530	-2.69363185809797	2.70732290081985e-05	Protein NRT1/ PTR FAMILY 7.3
CITRE_004g016120	-1.79911628815391	0.000896396650518005	Omega-hydroxypalmitate O-feruloyl transferase
CITRE_004g017290	0.772241451575054	9.53338200578727e-10	conserved hypothetical protein
CITRE_004g017310	0.410307117401827	4.89957837871167e-05	Calnexin
CITRE_004g017350	-0.508462527623417	0.00145813673162974	Ribonuclease
CITRE_004g018460	-1.8644726085815	0.000231497216794887	Protein JASON
CITRE_004g018490	0.600387982263355	3.72164134513336e-05	Glutathione transferase
CITRE_004g018810	0.608388259724662	4.74649303853798e-06	conserved hypothetical protein
CITRE_004g019460	-0.529903512036953	4.49717175117951e-06	Hexosyltransferase
CITRE_004g020150	0.847827688672839	0.00208726346474003	Hypothetical protein
CITRE_004g020220	1.12821949970309	8.49581256590274e-05	Hypothetical protein
CITRE_004g020230	0.285739109337106	1.76855527396585e-05	Protein DETOXIFICATION 21
CITRE_004g020450	0.620470595429961	4.16033028974912e-05	Protein DETOXIFICATION
CITRE_004g021040	0.952584588920693	7.08738762565867e-08	Glutathione transferase
CITRE_004g021070	1.03338298828756	3.98149249611537e-10	Glutathione transferase
CITRE_004g021240	-1.80323445648365	0.000216127538890784	Non-specific phospholipase C3
CITRE_004g022470	0.660485820951677	5.83205442605634e-06	ClpS domain-containing protein
CITRE_004g024370	-0.385067877167763	0.000976716978016553	3-ketoacyl-CoA synthase
CITRE_004g024690	0.620163192217686	2.83909358630011e-05	Protein PIN-LIKES 3
CITRE_004g025150	1.34575688400664	4.34505700500813e-05	Nudix hydrolase domain-containing protein
CITRE_004g025180	-1.06126196764437	2.9022058643879e-05	conserved hypothetical protein
CITRE_004g025460	-0.979093132424796	0.000146829940427371	Protein kinase domain-containing protein
CITRE_004g026930	-0.94336505847997	0.000553340259576835	DUF4408 domain-containing protein
CITRE_004g027350	0.49312881064575	0.000928385609497565	conserved hypothetical protein
CITRE_004g027370	0.765740494066088	5.92647739444976e-05	conserved hypothetical protein
CITRE_004g027800	-0.883538233226542	0.000496471324321656	C2 NT-type domain-containing protein
CITRE_004g028400	1.07184406310213	3.65491186260985e-05	SHSP domain-containing protein
CITRE_004g028450	-0.652850602535352	1.04753989776033e-06	Protein kinase domain-containing protein
CITRE_004g028710	-0.536640348623513	4.17951618556994e-05	Actin-related protein 3
CITRE_004g028850	1.00904158441604	3.24676496956341e-05	Cellulase domain-containing protein
CITRE_004g029410	1.02341240155355	0.000176711622173641	Protein DETOXIFICATION
CITRE_004g029530	0.636231736428199	1.55552120717388e-09	conserved hypothetical protein
CITRE_004g029830	-0.567552792519781	0.000365453926661896	putative polygalacturonase At1g80170
CITRE_004g029840	3.64975961668375	0.000117888541543406	hypothetical protein
CITRE_004g029850	2.94749353606378	0.000197446232372471	putative Polygalacturonase At1g48100
CITRE_004g029880	0.319261307007491	0.000256913600817496	ADP-ribosylation factor 2
CITRE_004g030240	1.41747648896021	4.4859110521851e-07	RING-type E3 ubiquitin transferase
CITRE_004g030310	-0.506727883408428	1.88861384941948e-06	putative Potassium transporter 6
CITRE_004g030500	4.3254682146975	0.000538989559990409	Bet_v_1 domain-containing protein
CITRE_004g030700	1.05986570861632	2.81634620253315e-05	putative UDP-glycosyltransferase 74B1
CITRE_004g030740	0.718246418729848	0.000875729495662629	M20_dimer domain-containing protein
CITRE_004g031050	-1.040502316603	0.00173737469032774	conserved hypothetical protein
CITRE_004g031230	-0.733729739740243	0.000771055699404568	Glutathione transferase
CITRE_004g031410	0.625758344511075	0.000339300514991675	conserved hypothetical protein
CITRE_004g031630	0.610390019583038	0.000294104620655903	SNF1-related protein kinase regulatory subunit gamma-1-like
CITRE_004g031760	0.45032711582036	0.00205738935031149	UDP-galactose/UDP-glucose transporter 3
CITRE_004g032280	2.1215248628046	0.00496773387332273	Expansin
CITRE_004g032440	0.626054660290641	0.000201057606212667	conserved hypothetical protein
CITRE_004g032860	0.221092109780102	0.00180375012072763	Macro domain-containing protein
CITRE_004g033070	3.48099105506503	0.000182351297749383	conserved hypothetical protein
CITRE_004g033120	-5.06571525260488	0.000901721952883133	Bidirectional sugar transporter SWEET
CITRE_004g033140	0.619405768523271	0.00114658772130696	Glycerophosphodiester phosphodiesterase
CITRE_004g033230	-1.42793010529912	0.000926790719200579	putative Zinc finger protein CONSTANS-LIKE 15
CITRE_004g033500	1.8849696895852	4.69997344611421e-11	Annexin D4
CITRE_004g033780	-0.903201282984562	0.000212182013183671	Cytokinin dehydrogenase
CITRE_004g033850	-1.42904036366392	2.3625519877687e-05	Carboxypeptidase
CITRE_004g034100	0.505545396440049	9.7915051079679e-05	conserved hypothetical protein
CITRE_004g034410	-2.41960665835158	9.07993556191593e-05	Zinc finger protein WIP2
CITRE_004g034750	0.686181690697516	2.73489028984371e-05	Peptidylprolyl isomerase
CITRE_004g034760	0.664778576858906	8.57075391982954e-06	putative Peptidyl-prolyl cis-trans isomerase FKBP42
CITRE_005g000200	-1.33850131934438	0.000150719442773027	MLO-like protein
CITRE_005g001980	0.324418222041363	0.000915251105186729	conserved hypothetical protein
CITRE_005g002040	-7.01635139389078	3.81649778770932e-05	putative DNA binding protein
CITRE_005g002170	-5.07755972741223	5.15627735157901e-05	conserved hypothetical protein
CITRE_005g002470	0.695833431268644	3.50236816483085e-06	Cytochrome c-2
CITRE_005g002600	0.702632044108553	6.82498980617098e-09	Ras-related protein RABD1
CITRE_005g002780	1.26023664471851	4.03369207115408e-07	conserved hypothetical protein
CITRE_005g004460	0.775411629790154	2.87653789551597e-05	FAD-binding PCMH-type domain-containing protein
CITRE_005g004680	-0.859277706134009	6.89754962382657e-05	Heat shock 70 kDa protein%2C mitochondrial
CITRE_005g006650	2.15121052521993	3.1089650771324e-06	conserved hypothetical protein
CITRE_005g008180	0.633769995665042	0.000595259473861367	putative Coumarin 8-geranyltransferase 1b%2C chloroplastic
CITRE_005g009720	4.52475255861943	2.14661855119409e-06	LRRNT_2 domain-containing protein
CITRE_005g009760	6.77135994761753	2.26737720412517e-07	conserved hypothetical protein
CITRE_005g012000	1.07573189873487	4.93489969548618e-09	NAD(P)H dehydrogenase (quinone)
CITRE_005g012010	0.749246324565146	1.2316183113576e-06	conserved hypothetical protein
CITRE_005g012040	3.48348319268665	0.000250941822949064	Peptidase A1 domain-containing protein
CITRE_005g012120	1.06035392523249	0.000543735438927312	VQ domain-containing protein
CITRE_005g012530	0.640143519117258	5.36728214411699e-07	Urease accessory protein F
CITRE_005g012550	0.50878897286283	7.75024990561007e-06	Isocitrate dehydrogenase [NADP]
CITRE_005g012690	-1.38652277252119	0.00056597685046487	WAT1-related protein
CITRE_005g013170	1.05751672630017	0.000400354408345703	conserved hypothetical protein
CITRE_005g013200	1.50320333163214	9.4287219482712e-13	LRRNT_2 domain-containing protein
CITRE_005g013800	-0.672541571486224	0.00185013832184306	NB-ARC domain-containing protein
CITRE_005g013850	1.21759822220552	0.000449205067910129	NB-ARC domain-containing protein
CITRE_005g014260	-2.61480108643744	0.000333804473603048	AP2/ERF domain-containing protein
CITRE_005g015820	0.283203289705486	0.000893879629787827	Glycerol-3-phosphate acyltransferase%2C chloroplastic
CITRE_005g016490	0.646270550127788	2.28273034617568e-05	U6 snRNA-associated Sm-like protein LSm4
CITRE_005g016850	0.738475363596019	0.000708177311223811	putative Receptor-like protein 13
CITRE_005g017250	0.732035521575477	0.000666854204078986	putative Receptor-like protein 13
CITRE_005g017260	0.77048979112217	0.000132877724877264	putative Receptor-like protein 13
CITRE_005g017350	1.02150113590255	0.000134898343005328	LRRNT_2 domain-containing protein
CITRE_005g017460	1.14755506289387	3.61963382381292e-05	putative Receptor-like protein 13
CITRE_005g017600	-0.855835049140366	4.45866971955397e-09	Protein CYCLOPS
CITRE_005g017890	1.59376100407748	0.00129485766570697	Pectin acetylesterase
CITRE_005g019010	0.606058332738739	7.60903545076967e-12	Aldo_ket_red domain-containing protein
CITRE_005g019160	-4.48900322369881	2.90125855740887e-05	Hydroxycinnamoyl-CoA shikimate/quinate hydroxycinnamoyl transferase
CITRE_005g019330	1.21658809174667	7.18170523700362e-10	UDP-glycosyltransferase 76B1
CITRE_005g019560	-0.927083673023952	1.27144963395813e-06	Importin alpha isoform
CITRE_005g020170	2.2050338306934	2.43292428927479e-05	N-acetyltransferase domain-containing protein
CITRE_005g020610	0.703755572749642	6.59102355861312e-05	3-oxo-Delta(4%2C5)-steroid 5-beta-reductase
CITRE_005g022240	4.23348532686797	3.22647530354184e-05	Protein kinase domain-containing protein
CITRE_005g023120	0.474743016465745	0.000143966577607364	Amidase 1
CITRE_005g023320	-0.997786519530959	0.000289967619455173	NB-ARC domain-containing disease resistance protein
CITRE_005g023980	2.77146313759923	0.000679361835028572	Formin-like protein
CITRE_005g025110	-0.875273169880505	0.000989545302402115	Lon protease%2C mitochondrial
CITRE_005g025980	0.637974164197505	0.000789493879623667	Protein TRIGALACTOSYLDIACYLGLYCEROL 5%2C chloroplastic
CITRE_005g026000	0.614219621148028	1.42325680835025e-05	Syntaxin-6_N domain-containing protein
CITRE_005g027020	-1.40620627518688	0.000243480580752041	Protein DETOXIFICATION
CITRE_005g027110	0.826414950702853	3.81613894977778e-05	Glutamyl-tRNA reductase
CITRE_005g027310	-0.714114492876591	0.0010091662333366	Serine hydroxymethyltransferase
CITRE_005g027510	0.702528549230591	0.000267805394174307	CHCH domain-containing protein
CITRE_005g027620	-0.296681371958077	0.00191195693063521	conserved hypothetical protein
CITRE_005g027750	0.604504283283337	8.88480912969184e-09	Mechanosensitive ion channel protein 3%2C chloroplastic
CITRE_005g028650	-0.42222693864335	3.45183362318458e-05	F-box protein FBW2
CITRE_005g029190	-0.303320268901733	0.000229158274854053	conserved hypothetical protein
CITRE_005g029510	3.63984844434218	2.91939703056258e-10	conserved hypothetical protein
CITRE_005g029730	0.478630889668944	0.000417724690911334	Hexosyltransferase
CITRE_005g029910	-0.628682708936074	8.99671714626117e-06	putative calcium-binding protein CML29
CITRE_005g030670	0.484030858005243	0.000659473347136633	conserved hypothetical protein
CITRE_005g030740	-2.29930487399381	2.14661855119409e-06	Response regulatory domain-containing protein
CITRE_005g030780	0.743252458694106	2.16153429664581e-06	Aldehyde dehydrogenase
CITRE_005g030850	-0.61953808916428	0.000257830800447758	C2 domain-containing protein
CITRE_005g030860	0.724805974157664	0.000569993247191134	NAC domain-containing protein 2
CITRE_005g030950	3.02296962603044	9.70411920964858e-08	Nramp
CITRE_005g031060	2.28083884488308	0.00246362238940018	putative protein kinase domain-containing protein
CITRE_005g031660	-0.6705719562687	0.0008351167248048	Embryo defective
CITRE_005g032520	-3.10861782098655	1.00904126340068e-05	Extensin
CITRE_005g032530	-0.357854898926767	4.14866823192451e-06	Serine/threonine-protein kinase STY46
CITRE_005g033150	-2.14104313498995	8.12499064201476e-06	Peroxidase
CITRE_005g033390	0.481684437247366	0.00136481565667392	conserved hypothetical protein
CITRE_005g033640	0.708081285563207	4.35321890056419e-11	Uncharacterized oxidoreductase At4g09670
CITRE_005g034660	-0.6357134381204	1.98307426032066e-05	putative FT-interacting protein 3
CITRE_005g034680	0.735120943306043	1.05727746227754e-05	(+)-piperitol/(+)-sesamin synthase CYP81Q2
CITRE_005g034860	0.480574968642619	0.000280403209156	conserved hypothetical protein
CITRE_005g035320	0.822950783836565	5.6392649840399e-05	putative protein DCL%2C chloroplastic
CITRE_005g035500	0.439167336877684	0.000155759328252185	Protein TIC 22%2C chloroplastic
CITRE_005g036250	-0.946695041426702	0.0008351167248048	Allene oxide synthase 1%2C chloroplastic
CITRE_005g036330	2.06663687634269	1.21380230841402e-05	conserved hypothetical protein
CITRE_005g037100	-0.488999147405962	0.000936285504422461	Protein kinase domain-containing protein
CITRE_005g037150	-0.679678908944132	5.91214207312851e-05	MFS domain-containing protein
CITRE_005g037490	2.43918024552473	0.00047362103555992	putative HMA domain-containing protein
CITRE_005g037530	0.53153303374808	0.000583380875913052	Bifunctional nuclease 1
CITRE_005g037740	-0.780845013842501	4.16901346860476e-05	Jacalin-related lectin 3
CITRE_005g037820	0.530086980901831	0.000776863944782206	putative GTP-binding protein OBGC2
CITRE_005g038310	-1.22717999869712	8.17368331845675e-05	Auxin response factor
CITRE_005g038690	1.29100222860567	4.80195523763451e-09	J domain-containing protein
CITRE_005g038740	0.617674533383589	9.77155563407634e-07	HATPase_c domain-containing protein
CITRE_005g038810	-0.949395942851913	0.000444409721489235	Protein kinase domain-containing protein
CITRE_005g039040	-1.09977949721076	1.88059745064186e-05	CO(2)-response secreted protease
CITRE_005g039400	-1.51892275694254	0.000250941822949064	putative CRAL-TRIO domain-containing protein
CITRE_005g039760	1.17322806599246	0.000205425175269685	conserved hypothetical protein
CITRE_005g039890	-0.528805620779839	0.000258245748137831	1%2C4-alpha-glucan branching enzyme
CITRE_005g040550	1.29127199413449	4.01208176813485e-22	3-hydroxy-3-methylglutaryl coenzyme A reductase
CITRE_006g000730	1.36454646219375	0.00064582219701542	putative LRR receptor-like serine/threonine-protein kinase GSO2
CITRE_006g000740	1.45870223360105	1.07504692229238e-06	Protein kinase domain-containing protein
CITRE_006g001010	1.20099234258065	2.13725869858068e-06	Protein kinase domain-containing protein
CITRE_006g002400	1.79274044296149	9.88652527603395e-08	Flowering locus T
CITRE_006g002540	0.578714758213785	3.19407247949605e-09	putative Phospholipase A(1) LCAT3
CITRE_006g002550	0.743772574515427	0.000177027730625725	Hypothetical protein
CITRE_006g002830	0.689761406203934	3.33728432110608e-06	Glycosyltransferase
CITRE_006g003060	1.19017454655433	2.50348701828025e-06	putative GDSL esterase/lipase At1g23500
CITRE_006g003290	2.52765133230837	0.000119490350399253	Trans-resveratrol di-O-methyltransferase
CITRE_006g003790	0.40567496986422	0.000342248057081797	4-hydroxy-4-methyl-2-oxoglutarate aldolase
CITRE_006g004780	0.548956222697347	0.000354955826336043	putative Sodium/hydrogen exchanger 6
CITRE_006g004790	0.629578082559039	2.85101553750377e-06	conserved hypothetical protein
CITRE_006g005390	-9.98628503511679	0.000840529205760389	UDP-glycosyltransferase 73C2
CITRE_006g005870	0.633187164712762	2.35490903609615e-06	conserved hypothetical protein
CITRE_006g007090	1.01851648535836	0.000635940375343046	Protein kinase domain-containing protein
CITRE_006g007350	-0.82745080039354	0.00124638553456657	Pentatricopeptide repeat-containing protein At2g37230
CITRE_006g007590	1.09118610703322	7.96382103673116e-05	Aquaporin PIP2-2
CITRE_006g010090	-2.19359348686541	7.28371023038938e-05	Na_H_Exchanger domain-containing protein
CITRE_006g010290	0.439288087698112	0.00011598405629823	PHD-type domain-containing protein
CITRE_006g010420	0.587801768410487	0.00108381110932511	Actin
CITRE_006g011760	0.762037405499665	0.000896396650518005	Hypothetical protein
CITRE_006g012360	-2.09675673318644	0.00166722191020718	Copper transport protein
CITRE_006g012440	-0.727950362027727	0.00014296280091066	conserved hypothetical protein
CITRE_006g012610	0.465134515550941	0.000700165423369066	conserved hypothetical protein
CITRE_006g012670	-0.86803076956128	0.000231497216794887	Neutral ceramidase
CITRE_006g012700	0.629205959391988	5.96116659342786e-08	Mitochondrial uncoupling protein 1
CITRE_006g012990	2.12577068989792	1.43573026277678e-11	conserved hypothetical protein
CITRE_006g013000	2.11701591792067	7.16646584405833e-07	conserved hypothetical protein
CITRE_006g013010	2.1087307035951	2.59632412716158e-07	conserved hypothetical protein
CITRE_006g013080	-1.30427363830829	0.000284485614009285	Protein NRT1/ PTR FAMILY 8.1
CITRE_006g013540	-1.30447789410423	0.00168060885424916	conserved hypothetical protein
CITRE_006g013760	0.555577074513473	4.91322607149252e-06	Protein root UVB sensitive 5
CITRE_006g013900	0.73631636954891	5.08371051472872e-05	Pyridoxal 5'-phosphate synthase subunit PDX1.3
CITRE_006g014150	-0.963571655366183	0.000149969446472164	AMP deaminase
CITRE_006g014220	1.00076735713663	1.27211029212101e-05	Mitochondrial succinate-fumarate transporter 1
CITRE_006g014460	1.11156967092099	8.12499064201476e-06	conserved hypothetical protein
CITRE_006g014540	0.518481525964633	0.000444409721489235	BTB domain-containing protein
CITRE_006g015760	8.97774606917669	8.81053051957849e-10	Non-specific lipid-transfer protein 3
CITRE_006g016290	0.355682378689852	8.25706775060904e-05	Protein RETICULATA-RELATED 3%2C chloroplastic
CITRE_006g017200	1.04583028075806	1.84026183597934e-05	Glycosyltransferase
CITRE_006g017780	-0.485606862456951	0.0010158445620806	Guanine nucleotide exchange factor SPIKE 1
CITRE_006g018260	-0.961370979935623	0.000343500993610859	Delta(12)-fatty-acid desaturase FAD2
CITRE_006g018510	-0.516468062299124	2.81634620253315e-05	PMR5N domain-containing protein
CITRE_006g018930	0.734860993146692	7.7858601291582e-10	putative serine/arginine-rich SC35-like splicing factor SCL33
CITRE_006g018940	0.64643618274932	3.80855625901817e-10	putative Serine/arginine-rich SC35-like splicing factor SCL33
CITRE_006g019230	-0.568222314796883	0.000880974206205004	putative glutamate carboxypeptidase AMP1
CITRE_006g019260	0.522100588646809	0.000155759328252185	putative D-lactate dehydrogenase [cytochrome]%2C mitochondrial
CITRE_006g019380	1.03709994186769	3.59437327538645e-07	ABC transporter domain-containing protein
CITRE_006g019480	0.487587494147793	0.000365453926661896	Fra a 1-associated protein
CITRE_006g020970	0.460374985218631	0.000125688352682163	Iron-sulfur assembly protein IscA-like 2%2C mitochondrial
CITRE_006g021170	0.40697404514272	0.00125574956605041	AB hydrolase-1 domain-containing protein
CITRE_006g021200	0.601631564226095	2.87460441506499e-05	Protein YIP
CITRE_006g021350	2.69821331472192	1.16257808033723e-30	putative F-box protein At2g27310
CITRE_006g021540	-0.845668016454282	0.0005313486063138	ABC transporter G family member 34
CITRE_006g021660	-0.887091794765785	0.00127412884192574	Trihelix transcription factor PTL
CITRE_006g021750	-0.829395736265213	1.38466497663528e-05	ENDO3c domain-containing protein
CITRE_006g021830	-2.35106217286733	6.06156657615157e-05	conserved hypothetical protein
CITRE_006g022140	0.656223776766378	0.000824027420311587	Sulfite exporter TauE/SafE family protein 4
CITRE_006g022200	-0.527721806374442	0.000229158274854053	Amino_oxidase domain-containing protein
CITRE_006g022240	0.478345804907975	0.00056750993889717	15-cis-phytoene synthase
CITRE_006g023210	-0.924272861446836	0.00113471239726645	putative Cytochrome P450 98A2
CITRE_006g023340	0.630366053465497	0.000137440683579447	Cytochrome P450 94A1
CITRE_006g023360	0.766753056946448	0.000539767591853613	Protein NRT1/ PTR FAMILY 3.1
CITRE_006g023390	0.632920254740883	3.35949099563847e-05	putative PsbP domain-containing protein
CITRE_006g023400	0.830423659681485	8.67612656265921e-12	putative PsbP domain-containing protein 6%2C chloroplastic
CITRE_006g023450	-0.972416236165098	1.67371417602055e-06	Calmodulin-interacting protein 111
CITRE_006g023700	-0.343373890244742	0.00123070571412037	CDPK-related kinase 7
CITRE_006g023940	0.3841300112418	0.00115491901429111	Senescence-associated protein AAF%2C chlorolplastic
CITRE_006g024310	0.897504565992356	6.02174677885837e-05	putative Geranylgeranyl pyrophosphate synthase%2C chloroplastic
CITRE_006g024960	0.530035586765152	6.83104377735123e-09	Protein-lysine N-methyltransferase CISIN_1g019324mg
CITRE_006g024980	3.0748470913943	3.05053934861506e-09	putative S-adenosylmethionine-dependent methyltransferase At5g38780
CITRE_006g026350	0.682023225523142	6.49599011531272e-08	Tryptophan synthase
CITRE_006g026360	-0.949345282133152	0.00120394269087006	conserved hypothetical protein
CITRE_006g026440	0.389450588187622	2.34126958453649e-05	conserved hypothetical protein
CITRE_006g026450	0.387211130586692	5.69075816626477e-05	S-adenosylmethionine decarboxylase proenzyme
CITRE_006g027410	-0.879403561953531	0.000227840473066605	DNA-directed RNA polymerase
CITRE_006g027460	-0.343686389374419	0.000901721952883133	Aa_trans domain-containing protein
CITRE_006g027470	-0.521100915124092	0.00102824555389491	putative WPP domain-interacting tail-anchored protein 1
CITRE_006g027840	-0.619793359724264	0.000259573621609741	ABC transporter B family member 15
CITRE_006g028860	2.05308023370201	2.27886925621507e-05	conserved hypothetical protein
CITRE_006g028990	0.61443336769096	0.00154648189350148	putative F-box/kelch-repeat protein At3g17530
CITRE_006g029440	0.60338399041705	1.50166803939111e-06	Cystathionine gamma-synthase 1%2C chloroplastic
CITRE_006g029600	-0.635270840995983	0.00104137789459892	putative BAG family molecular chaperone regulator 8%2C chloroplastic
CITRE_006g029720	0.388750055529912	0.000243480580752041	RING-type domain-containing protein
CITRE_006g029810	1.1209418904561	3.9396485282952e-06	conserved hypothetical protein
CITRE_006g030120	-1.12325713408705	2.12996952150747e-05	Carboxypeptidase
CITRE_007g000400	-0.432759891843748	1.84635083692687e-05	putative DNA mismatch repair protein MLH3
CITRE_007g001120	0.390911116018048	4.74649303853798e-06	Protein-serine/threonine phosphatase
CITRE_007g001260	0.553169852983281	0.000616207043083812	SKP1-like protein
CITRE_007g001530	-0.994460068390698	0.00132954045490669	Alpha-mannosidase
CITRE_007g001580	-0.866712371821033	1.71772787692593e-07	putative protein NUCLEAR FUSION DEFECTIVE 4
CITRE_007g002460	-2.99558538734842	3.68171018603647e-10	Cytochrome P450 84A1
CITRE_007g002510	-3.21180028224999	0.000798340634944505	Cytochrome P450 711A1
CITRE_007g002610	-0.595383585198965	0.000287204736526008	Morc6_S5 domain-containing protein
CITRE_007g002690	-1.10732326392904	0.00081834643693107	3-epi-6-deoxocathasterone 23-monooxygenase CYP90C1
CITRE_007g002940	-2.7854941377005	0.000229158274854053	AAA domain-containing protein
CITRE_007g003030	0.646381130583129	0.000162183824023847	putative Lipid phosphate phosphatase epsilon 1%2C chloroplastic
CITRE_007g003100	-1.0799880198898	0.000469083236295928	J domain-containing protein
CITRE_007g003300	-0.822763991270859	2.36958859842926e-05	ZF-HD dimerization-type domain-containing protein
CITRE_007g003320	0.631646592790147	2.04199719434182e-08	MFS domain-containing protein
CITRE_007g004100	1.51233112011271	8.71682016889536e-13	conserved hypothetical protein
CITRE_007g004340	0.685559335878398	0.000761004563212308	CASP-like protein
CITRE_007g004650	2.0753836399797	1.07776939922877e-05	AB hydrolase-1 domain-containing protein
CITRE_007g004690	2.26870354975962	0.00677684102745857	AB hydrolase-1 domain-containing protein
CITRE_007g004950	1.07573541230288	0.000736708395051293	conserved hypothetical protein
CITRE_007g005300	-0.598970071238014	0.000578871180982935	Remorin_C domain-containing protein
CITRE_007g005460	1.47144731145361	2.81491223876893e-07	Caffeoyl-CoA O-methyltransferase
CITRE_007g006080	0.981909405007336	0.000333159952211995	Cytochrome P450 81Q32
CITRE_007g006190	-0.382019410260626	0.000558695946573957	Peptidase A1 domain-containing protein
CITRE_007g006280	0.408582981059689	0.00191505782395174	Protein-serine/threonine phosphatase
CITRE_007g006950	-0.978132235661415	0.000160846079543661	BTB/POZ domain-containing protein At3g49900
CITRE_007g007660	-2.4963870695727	6.59708611710283e-06	conserved hypothetical protein
CITRE_007g007750	0.733505857092852	2.48105391868359e-06	conserved hypothetical protein
CITRE_007g008000	2.21772657449073	0.00484994088531614	PKS_ER domain-containing protein
CITRE_007g008790	0.350216380827802	0.00168014574236048	GTP cyclohydrolase II
CITRE_007g009170	0.55452920961426	0.00140832725470402	Abhydrolase_3 domain-containing protein
CITRE_007g009880	-1.32439300927199	1.06719887695016e-06	Jacalin-type lectin domain-containing protein
CITRE_007g010000	-1.75758614535062	0.000339300514991675	AAA domain-containing protein
CITRE_007g010010	-1.94081630226832	1.85288722863817e-06	Peroxidase
CITRE_007g010120	0.529537597349491	0.000215333894498557	conserved hypothetical protein
CITRE_007g010260	0.409598027779108	0.0008351167248048	ABC-type xenobiotic transporter
CITRE_007g010690	-0.907684178688979	0.00108381110932511	Chaperonin CPN60-like 2%2C mitochondrial
CITRE_007g010740	4.63083867950714	0.000617926186704612	Protein HOTHEAD
CITRE_007g010810	4.51906823122619	1.62764301904203e-05	putative Transcription factor MYB26
CITRE_007g011890	-0.624511192359831	0.00108381110932511	Nuclear pore complex protein
CITRE_007g011950	-0.938147789812821	0.000711615738284049	NB-ARC domain-containing protein
CITRE_007g012020	0.849189477668263	6.1547111364806e-35	(S)-2-hydroxy-acid oxidase
CITRE_007g012090	1.13293732135192	7.96074218637103e-05	(S)-2-hydroxy-acid oxidase
CITRE_007g012220	1.4263159319773	0.000361671559055419	Hypothetical protein
CITRE_007g012270	0.813447736768895	0.00118130468136868	Auxin-responsive protein SAUR78
CITRE_007g012280	0.454300345612154	0.00115491901429111	SHSP domain-containing protein
CITRE_007g012920	1.28307833855463	6.81105076221216e-06	Inositol oxygenase
CITRE_007g013100	1.04861138349526	0.000807504129295136	conserved hypothetical protein
CITRE_007g013210	-0.70827159222896	0.00134066512384967	MMS19 nucleotide excision repair protein
CITRE_007g013320	-0.966913440115195	0.000512555960877953	SAWADEE domain-containing protein
CITRE_007g013420	0.718503722728379	0.00026781089815633	putative protein transport protein SEC13
CITRE_007g013850	0.42890200347894	2.70732290081985e-05	putative CoA ligase CCL8
CITRE_007g014080	-3.07403613232235	8.79061136568106e-14	Sulfite exporter TauE/SafE family protein 3
CITRE_007g014210	0.823522670461237	1.76855527396585e-05	SOR_SNZ domain-containing protein
CITRE_007g014810	0.746671399921561	0.000322513780132841	F-box domain-containing protein
CITRE_007g014850	0.848282879955775	0.000145377884200212	putative F-box domain-containing protein
CITRE_007g015350	1.01243038571111	3.98641023359858e-07	Protein kinase domain-containing protein
CITRE_007g015540	0.931987650904797	4.56409116212157e-06	F-box domain-containing protein
CITRE_007g016110	-0.381851697276387	0.00123928366973652	conserved hypothetical protein
CITRE_007g016510	-1.27077521904503	8.6342175320099e-05	Abhydrolase_2 domain-containing protein
CITRE_007g016820	-0.689521665517849	0.00122041844439282	putative disease resistance protein At5g63020
CITRE_007g017300	1.12397078353551	0.000372898243233294	SHSP domain-containing protein
CITRE_007g017510	-1.4214817565463	0.000678345368202698	Protein LURP-one-related 12
CITRE_007g017580	1.29628586800948	0.000239876008999722	FA_desaturase domain-containing protein
CITRE_007g018350	2.47574219909166	0.00056597685046487	LRRNT_2 domain-containing protein
CITRE_007g019030	0.557516997313232	6.18186137248046e-08	Nodulin-like domain-containing protein
CITRE_007g019080	0.62788265090624	0.00033985367498334	putative KIX_2 domain-containing protein
CITRE_007g019550	1.58755898378221	1.03434513673987e-13	LRRNT_2 domain-containing protein
CITRE_007g020430	-1.65633253327724	2.39818740969276e-05	Epimerase domain-containing protein
CITRE_007g020860	0.79051719149572	0.000164908868877256	putative Chaperone protein dnaJ 8%2C chloroplastic
CITRE_007g020890	-1.01980605598982	0.000444409721489235	Shikimate O-hydroxycinnamoyltransferase
CITRE_007g021280	0.368773217318051	0.00143934779978997	Nudix hydrolase domain-containing protein
CITRE_007g022350	1.02064020380504	5.20760831629635e-08	Xanthotoxin 5-hydroxylase CYP82C4
CITRE_007g022480	0.562704780426992	5.14566985608912e-05	F-box domain-containing protein
CITRE_007g023430	0.345618155107117	1.62764301904203e-05	putative GPN-loop GTPase QQT1
CITRE_007g023610	-3.58363894613205	0.000697094618937198	Beta-amyrin synthase
CITRE_007g025170	1.010019767441	4.79206635769898e-05	putative Reticulon-like protein
CITRE_007g025190	0.30089564097982	0.00103434265589752	putative Ultraviolet-B receptor UVR8
CITRE_007g025410	1.6975156915551	1.03795027954488e-09	Non-specific lipid-transfer protein
CITRE_007g025780	-0.378569717109067	7.96382103673116e-05	Trans-cinnamate 4-monooxygenase
CITRE_007g026260	0.460990978628824	0.000239876008999722	NAD-dependent protein deacylase
CITRE_007g026320	0.463033415980394	0.000391683813192675	Prenylcys_lyase domain-containing protein
CITRE_007g027190	-3.2401547353487	1.76855527396585e-05	NAC domain-containing protein
CITRE_007g027200	0.635493916776658	5.51377118694905e-10	E1_dh domain-containing protein
CITRE_007g027470	-1.62250511239595	0.00047692465500231	RING-type E3 ubiquitin transferase
CITRE_007g027660	-1.43339262201388	0.00027316775142752	conserved hypothetical protein
CITRE_007g027800	0.62001161907004	0.00100392096143549	Photosystem I reaction center subunit N%2C chloroplastic
CITRE_007g027850	0.496805352959675	0.000789486762730683	NAD(P)H-quinone oxidoreductase subunit O%2C chloroplastic
CITRE_007g028440	-0.792854518781813	7.94305236411686e-05	PGG domain-containing protein
CITRE_007g028920	0.672763606317993	4.74649303853798e-06	putative Serine/threonine-protein kinase ATG1t
CITRE_007g029320	-1.66248724663544	0.00126732703910285	conserved hypothetical protein
CITRE_007g029420	-0.497798756197075	0.00174340228210786	Protein BOLA2
CITRE_007g030060	-0.468196825794291	0.000761004563212308	Non-specific serine/threonine protein kinase
CITRE_007g030320	-0.591818164574808	1.00250523639652e-05	RNA cytidine acetyltransferase
CITRE_007g030610	2.16952802609566	8.75494125107143e-12	putative WRKY transcription factor 51
CITRE_007g031110	0.428817652171227	0.000105528615193865	Developmentally-regulated G-protein 3
CITRE_007g032350	0.848993558293019	0.00118879477064388	Hypothetical protein
CITRE_007g033110	-1.25267512624911	0.000111906958712318	Acyl-coenzyme A oxidase
CITRE_007g033410	1.14394131050093	1.55556707373627e-08	Annexin
CITRE_008g000200	-0.781513407288548	0.000701513574314153	MFS domain-containing protein
CITRE_008g000210	-0.686695498532106	0.000832814779834995	Mitochondrial phosphate carrier protein 1%2C mitochondrial
CITRE_008g000270	0.591849891930771	0.000131457976031076	ARMT1-like_dom domain-containing protein
CITRE_008g000860	-2.92985152002038	0.0005289430786928	Acidic class II chitinase
CITRE_008g000890	-1.88701619908908	0.00313677174713137	Inactive chitinase-like protein 1
CITRE_008g002000	-1.8500265298967	0.00028985412031633	Protein kinase domain-containing protein
CITRE_008g002720	0.507629039997065	0.000423354171250515	DUF21 domain-containing protein At2g14520
CITRE_008g003240	1.91773118933049	4.79206635769898e-05	F-box domain-containing protein
CITRE_008g003290	-0.654604866366952	8.86795709250167e-05	putative Pre-mRNA-processing protein 40A
CITRE_008g003530	0.480366040581259	9.08454356330966e-05	Serine carboxypeptidase-like 18
CITRE_008g004790	-1.23449705737757	6.32794149576826e-08	Cinnamyl alcohol dehydrogenase
CITRE_008g004890	-1.13699475253974	1.62900132956986e-05	D-3-phosphoglycerate dehydrogenase
CITRE_008g004960	0.442215634791928	0.00056597685046487	putative Cyclase-like protein 2
CITRE_008g005270	0.615039471478896	1.90266638917831e-08	40S ribosomal protein S16
CITRE_008g007870	-0.400873205089336	0.000850712131399899	MFS domain-containing protein
CITRE_008g007880	-0.436896988860153	0.000790331381871717	1-phosphatidylinositol 4-kinase
CITRE_008g008680	0.560618777734021	0.000858541256993536	Usp domain-containing protein
CITRE_008g008950	0.543746753473603	0.000409049088482475	Protein RER1
CITRE_008g009080	-1.14325868239692	7.58959819078325e-08	conserved hypothetical protein
CITRE_008g011380	-0.878439101792151	0.00132954045490669	AAA domain-containing protein
CITRE_008g011580	1.09169577016262	0.00188955815112731	Type III polyketide synthase B
CITRE_008g011940	-0.445659857371552	0.000832814779834995	conserved hypothetical protein
CITRE_008g012020	3.3713863069007	7.51443908810942e-06	conserved hypothetical protein
CITRE_008g014070	0.760684804643869	7.7079448014544e-05	Aldo_ket_red domain-containing protein
CITRE_008g014750	0.541450981764612	7.08738762565867e-08	conserved hypothetical protein
CITRE_008g014840	-6.06316780016099	0.00054599940716433	conserved hypothetical protein
CITRE_008g015030	0.615381238813188	0.000154186470288632	Glycosyltransferase
CITRE_008g015120	0.831879447076504	7.9912121379498e-05	Glycosyltransferase
CITRE_008g016510	10.701010847038	2.99982280351696e-14	conserved hypothetical protein
CITRE_008g016770	1.73616680609523	0.000441409359646269	RING-type E3 ubiquitin transferase
CITRE_008g017190	0.298955264458848	0.00145114389031651	Sterol 14-demethylase
CITRE_008g017210	0.387390782561528	0.00162523860835158	Peptidylprolyl isomerase
CITRE_008g017580	0.742883528305452	0.000588808224812548	ADP-ribosyl cyclase/cyclic ADP-ribose hydrolase
CITRE_008g018330	-2.34307752558221	2.31166366119364e-05	Knot1 domain-containing protein
CITRE_008g018710	-0.983642800945696	0.00116790394648088	UvrD-like helicase ATP-binding domain-containing protein
CITRE_008g019060	0.688618400416554	2.74572266368555e-14	HTH myb-type domain-containing protein
CITRE_008g019160	4.72307185942798	9.72844673999116e-11	Protein kinase domain-containing protein
CITRE_008g019190	2.11222121569431	0.00126402756118698	conserved hypothetical protein
CITRE_008g020150	-0.873722380419585	0.000908194887060889	putative LRR receptor-like serine/threonine-protein kinase At1g53420
CITRE_008g020200	2.52944003270599	1.7946038925469e-11	VQ domain-containing protein
CITRE_008g020650	-0.509101885485284	0.00101474276170261	TPX2 domain-containing protein
CITRE_008g021250	-1.97012349980213	0.000400317930648625	putative Abscisic-aldehyde oxidase
CITRE_008g021260	-1.33669279826503	0.000896396650518005	Indole-3-acetaldehyde oxidase
CITRE_008g021380	1.9623855446711	0.000212424361409296	putative Wall-associated receptor kinase-like 2
CITRE_008g021890	1.09434320712391	2.06547176085461e-10	DnaJ protein
CITRE_008g022080	-0.696325575746957	0.000340090192860019	BHLH domain-containing protein
CITRE_008g022390	-0.676500920556787	0.00107900155597041	Pyr_redox_2 domain-containing protein
CITRE_008g022520	0.592102001640852	0.000488546195011788	DUF1279 domain-containing protein
CITRE_008g022690	-1.1293479527464	0.000469083236295928	NAC domain-containing protein
CITRE_008g022740	1.54898847448436	0.00126402756118698	F-box domain-containing protein
CITRE_008g023720	0.5977261442351	3.41482089526606e-05	conserved hypothetical protein
CITRE_008g024580	-0.558169404745304	5.22194387295984e-06	ENDO3c domain-containing protein
CITRE_008g025020	0.929853636649253	5.3725204499723e-06	conserved hypothetical protein
CITRE_008g025150	0.842241470969836	5.20849098016522e-05	conserved hypothetical protein
CITRE_008g025450	1.38798035646583	0.00152694693884448	Protein argonaute 5
CITRE_008g025850	0.261957286639208	0.000101625685604449	Vacuolar protein sorting-associated protein 41
CITRE_008g026230	-0.599463419683259	0.000348125300496851	Exostosin domain-containing protein
CITRE_008g026240	-1.99525257955937	5.48541664134289e-07	Xyloglucan endotransglucosylase/hydrolase
CITRE_008g026260	-1.32484541234566	8.80778393341161e-09	Carboxypeptidase
CITRE_008g026450	0.512341952247005	8.99671714626117e-06	4-coumarate--CoA ligase-like 7
CITRE_008g027230	0.582846421464633	0.000215266182233348	conserved hypothetical protein
CITRE_008g027250	-2.48121369276037	0.000488546195011788	PGG domain-containing protein
CITRE_008g027420	-0.580214567620289	0.00096286736873375	RING-CH-type domain-containing protein
CITRE_008g028350	-0.565834258891249	1.02837754841975e-07	Ethylene-responsive transcription factor RAP2-7
CITRE_008g028400	0.522696979523083	0.000152737573344291	Omega-6 fatty acid desaturase%2C chloroplastic
CITRE_008g028920	4.09295094433892	0.000103770465764469	3-ketoacyl-CoA synthase
CITRE_008g028990	-0.783201075410031	0.0012009472492282	putative Glutelin type-D 1
CITRE_008g029690	-1.50930601676718	0.000282789856043457	SHSP domain-containing protein
CITRE_008g030220	1.46667833945398	1.75918700511902e-06	Hypothetical protein
CITRE_008g030260	0.752793743266702	0.00025206694770655	conserved hypothetical protein
CITRE_008g030350	1.30900745218042	1.72355299838477e-05	conserved hypothetical protein
CITRE_008g030700	0.454208065045707	7.60933125551064e-05	Elongin-C
CITRE_008g031010	0.707368887407604	8.71906710099572e-05	UDP-glucose iridoid glucosyltransferase
CITRE_008g031080	1.00145500329294	6.94713318650486e-06	SHSP domain-containing protein
CITRE_008g031090	1.54950211118694	5.92647739444976e-05	SHSP domain-containing protein
CITRE_008g031340	-0.957162432134316	0.00103434265589752	DExH-box ATP-dependent RNA helicase DExH11
CITRE_008g031360	0.611699274469889	5.359536867241e-07	RRM domain-containing protein
CITRE_008g031370	-0.33289105238219	0.000404137996257465	Alpha-1%2C4 glucan phosphorylase
CITRE_008g031490	-0.687648710150818	0.000916705606631619	ThiC-associated domain-containing protein
CITRE_008g031660	1.26798448070742	1.98639073751235e-05	Hypothetical protein
CITRE_008g031740	0.798484063704656	4.74458238049616e-05	RING-type domain-containing protein
CITRE_008g031750	0.749750819629173	6.12284705476561e-07	Alkyl transferase
CITRE_008g031760	1.16106780390407	1.87526058476662e-11	conserved hypothetical protein
CITRE_008g031770	0.738460500297548	0.000259573621609741	Hypothetical protein
CITRE_008g031780	0.444385550269461	6.02174677885837e-05	Protein DAMAGED DNA-BINDING 2
CITRE_008g031920	-1.15666299765697	1.05585406918819e-05	Phosphoinositide phospholipase C
CITRE_008g032100	0.399269320206114	0.00123925896741327	conserved hypothetical protein
CITRE_008g032580	0.860239271955595	0.00103434265589752	UDP-glycosyltransferase 87A2
CITRE_008g032780	-0.896134595012342	7.27905264775487e-06	Terpene cyclase/mutase family member
CITRE_008g032960	0.574860720760038	0.000231034449558071	Hypothetical protein
CITRE_009g000730	4.99991388404079	2.85101553750377e-06	Polygalacturonase At1g48100
CITRE_009g000900	0.86471504936968	5.47439969922176e-05	Alkaline/neutral invertase
CITRE_009g001340	0.539223886759642	0.000761004563212308	Calcium-binding protein CP1
CITRE_009g001380	3.66643660326735	0.000776863944782206	Galactinol--sucrose galactosyltransferase
CITRE_009g001960	-0.655023539967292	5.3725204499723e-06	Fn3_like domain-containing protein
CITRE_009g002080	0.49268560944922	0.000446466811795785	Protein FAR1-RELATED SEQUENCE
CITRE_009g002580	0.750119645210664	0.00111791871373848	conserved hypothetical protein
CITRE_009g003130	1.02377495365461	0.000820070847921622	Late embryogenesis abundant protein Lea5
CITRE_009g003830	0.415165737227486	0.00184277547259133	Lipase_3 domain-containing protein
CITRE_009g004020	0.811530730698386	7.88127342405726e-05	CASP-like protein
CITRE_009g004420	0.358292628485688	0.00101244682064536	LEC14B
CITRE_009g004710	1.36328731976915	4.16033028974912e-05	conserved hypothetical protein
CITRE_009g004850	-1.24632687658162	0.000822634624840086	conserved hypothetical protein
CITRE_009g005090	-2.09348004717219	6.66983576959222e-06	DLH domain-containing protein
CITRE_009g005150	-0.886996064389951	0.000484187771014145	Mediator of RNA polymerase II transcription subunit 33A
CITRE_009g006020	-1.55993653920804	0.00129485766570697	conserved hypothetical protein
CITRE_009g006050	-0.889898740234008	5.85804006993643e-05	Amine oxidase
CITRE_009g006600	-0.889230522057717	1.53324812470129e-05	FCS-Like Zinc finger 8
CITRE_009g006960	0.544426731358143	1.28175300369786e-05	40S ribosomal protein S3a
CITRE_009g007270	0.708475163103068	0.000383744413324088	conserved hypothetical protein
CITRE_009g008300	-0.647051810315649	0.00100392096143549	H15 domain-containing protein
CITRE_009g009010	0.554344310335675	0.000839860094759834	conserved hypothetical protein
CITRE_009g009070	0.686830132108047	2.21320890959729e-05	Enoyl-CoA delta isomerase 2%2C peroxisomal
CITRE_009g009240	-0.76387078521584	1.62900132956986e-05	WAT1-related protein
CITRE_009g009250	0.708718295821564	3.38322570225259e-05	putative Transcription factor bHLH104
CITRE_009g009490	0.813945263169549	1.23988113559258e-08	putative Actin-depolymerizing factor
CITRE_009g009870	-0.520203223195287	0.000686770573626617	conserved hypothetical protein
CITRE_009g011700	-1.71818352892534	0.0010223846760333	putative folate-biopterin transporter 8%2C chloroplastic
CITRE_009g011930	0.501447107894917	5.66756786316561e-05	C2 domain-containing protein
CITRE_009g013150	0.576638123349586	0.000287204736526008	Protein PAM71-homolog%2C chloroplastic
CITRE_009g014330	0.519192304954593	0.00108381110932511	Acyltransferase
CITRE_009g014870	4.05825739346532	0.000123732657271449	F-box domain-containing protein
CITRE_009g015660	1.0659775462283	4.74649303853798e-06	putative 1-aminocyclopropane-1-carboxylate oxidase
CITRE_009g015670	1.17957466617998	1.59540792199259e-06	putative 1-aminocyclopropane-1-carboxylate oxidase
CITRE_009g016970	0.579727021510491	0.000215266182233348	putative magnesium transporter NIPA2
CITRE_009g017110	-0.404536410367302	0.00184277547259133	Zinc-hook domain-containing protein
CITRE_009g018290	0.967124967111734	5.15572376322266e-12	Aa_trans domain-containing protein
CITRE_009g018620	0.803566744226004	0.000433331727332952	conserved hypothetical protein
CITRE_009g019570	-1.00091180821095	0.000190295479168359	conserved hypothetical protein
CITRE_009g019630	5.01316914749634	0.000146414312482931	putative protein GAST1
CITRE_009g020560	5.54143120503635	8.99671714626117e-06	Glucan endo-1%2C3-beta-D-glucosidase
CITRE_009g022010	-0.700712620285593	6.81105076221216e-06	ABC transporter A family member 1
CITRE_009g023050	0.468268771711297	0.000650818365109016	Protein kinase domain-containing protein
CITRE_009g023670	0.480189297132501	1.96298416493632e-09	S5 DRBM domain-containing protein
CITRE_009g023800	0.818355690757746	1.50166803939111e-06	Guanylate kinase
CITRE_009g023820	0.354984992565092	0.00124467379573193	Nuclear transcription factor Y subunit
CITRE_009g025000	1.7684701736215	3.87772629713424e-10	AP2/ERF domain-containing protein
CITRE_009g025160	0.583472452390064	0.00158827581930874	conserved hypothetical protein
CITRE_009g025420	-1.08354056193947	1.98639073751235e-05	FAD-binding PCMH-type domain-containing protein
CITRE_009g026020	-1.13680042750725	3.0205765757669e-05	putative Hexose carrier protein HEX6
CITRE_009g026420	1.22031373983444	0.000296780619425708	conserved hypothetical protein
CITRE_009g026600	0.57300392920876	0.00120099870932807	Peroxisomal membrane protein 11B
CITRE_009g026680	1.21375031081086	0.000588439519731693	SHSP domain-containing protein
CITRE_009g026760	0.246871648140489	0.000676838840593058	E3 ubiquitin protein ligase RIN2
CITRE_009g026820	0.957711449509185	1.03762052589876e-08	Beta-fructofuranosidase
CITRE_009g027100	-4.87365645398843	1.05888691867743e-10	Pectinesterase
CITRE_009g027510	-2.88142151501352	0.000129327255856945	putative Flavonoid 3'-monooxygenase
CITRE_009g027710	0.392655164958919	0.00143934779978997	Clp R domain-containing protein
CITRE_009g028270	0.826534677699105	0.00056597685046487	GA 20-oxidase
CITRE_009g028490	0.593784702588547	2.9022058643879e-05	PKS_ER domain-containing protein
CITRE_009g028690	-0.710317105287753	0.000928385609497565	Serine/arginine-rich splicing factor RS40
CITRE_009g028800	-0.660729005770732	3.79428045218286e-05	putative protein IQ-DOMAIN 23
CITRE_009g028900	0.992823544496771	1.72009569473146e-10	Heat stress transcription factor B-2a
CITRE_009g029020	0.463639049912235	6.62774082279896e-06	Cytochrome b5 heme-binding domain-containing protein
CITRE_009g030000	-0.422465277657263	0.00108423550368956	Scarecrow-like protein 8
CITRE_009g030150	0.548627843695929	0.00014664676804228	CbiA domain-containing protein
CITRE_009g030220	1.41005251790937	1.93627358569502e-14	Heat shock protein 83
CITRE_009g030280	0.64443235498799	0.000441893251081235	conserved hypothetical protein
CITRE_009g030440	-1.39500553912316	7.43470579230716e-05	WRKY domain-containing protein
CITRE_009g030530	5.77697927550628	0.000391683813192675	putative BAHD acyltransferase BIA1
CITRE_009g030590	0.944492481982291	6.14853811349112e-09	putative membrane-associated kinase regulator 6
CITRE_009g030840	1.16999491107684	2.70201645501202e-10	ABC-type xenobiotic transporter
CITRE_009g030870	0.914057931689531	1.83687736903e-05	ABC-type xenobiotic transporter
CITRE_009g031570	0.681951746434035	6.13966925574596e-09	Cyclic nucleotide-binding domain-containing protein
CITRE_009g031580	0.755731393962413	1.11199792156218e-05	Cyclic nucleotide-binding domain-containing protein
CITRE_009g032400	4.77877627831974	3.0205765757669e-05	conserved hypothetical protein
CITRE_011g000390	-0.882886858272419	0.000272829769019803	putative disease resistance protein RGA3
CITRE_012g000550	1.90661766520421	0.000160940334275396	putative protein REDUCED CHLOROPLAST COVERAGE 3
CITRE_014g000420	0.628105590589351	0.00026604550007332	NADPH-dependent pterin aldehyde reductase
CITRE_015g000040	-0.521413514327635	0.000727221206303043	ADP-ribosyl cyclase/cyclic ADP-ribose hydrolase
CITRE_017g000150	0.618560543485267	2.33997773409723e-05	HGSNAT_cat domain-containing protein
CITRE_020g000020	0.440491193978869	0.000157861934892637	conserved hypothetical protein
CITRE_020g000120	0.538375447421625	8.78828273218385e-05	conserved hypothetical protein
CITRE_024g000090	0.856420099263356	0.00201234623682662	ABC transporter domain-containing protein
CITRE_030g000120	3.58981406858611	0.00273716614557836	conserved hypothetical protein
CITRE_032g000020	-1.2725094643596	0.00108423550368956	Peroxidase 15
CITRE_032g000230	0.73972793736703	5.87277381319464e-18	conserved hypothetical protein
CITRE_040g000100	0.668699637952816	6.19877005398544e-05	ADP-ribosyl cyclase/cyclic ADP-ribose hydrolase
CITRE_047g000770	0.994053378293175	0.00122420065845892	conserved hypothetical protein
CITRE_049g000750	1.40061644299942	1.29330549775226e-06	Photosystem II protein D1
CITRE_050g000380	-0.531692054378756	0.000926183052668704	RING-type domain-containing protein
CITRE_053g000200	0.808233061926129	1.48353385541128e-10	Potassium transporter
CITRE_063g000040	0.900553124689229	3.05773430222779e-12	Protein kinase domain-containing protein
CITRE_068g000020	0.595149416028424	0.000606491728708682	conserved hypothetical protein
CITRE_068g000070	0.934887642630808	5.85804006993643e-05	putative Endochitinase EP3
CITRE_069g000160	0.483711643209831	0.000122898407129807	Phytol kinase 1%2C chloroplastic
CITRE_073g000030	1.51108404972771	0.000488546195011788	hypothetical protein
CITRE_096g000020	-1.75184469555198	0.000678345368202698	conserved hypothetical protein
CITRE_096g000130	4.54054954441227	2.4093192448838e-05	LRRNT_2 domain-containing protein
CITRE_102g000050	1.77987411759569	0.00021167864717947	conserved hypothetical protein
CITRE_102g000110	1.68932514976511	0.000404434130114179	Cytochrome c biogenesis protein CcsA
CITRE_115g000010	-0.559732080183391	0.00026604550007332	BHLH domain-containing protein
CITRE_119g000100	1.6931215243802	3.52967172330616e-05	LRRNT_2 domain-containing protein
CITRE_131g000030	2.69358050680667	1.41839468513608e-07	Cu/Zn superoxide dismutase
CITRE_131g000040	2.19733006828969	6.01352752592316e-09	Cu/Zn superoxide dismutase
CITRE_138g000020	2.08563066921165	2.81634620253315e-05	putative Copper/zinc superoxide dismutase
CITRE_177g000020	1.37616782299452	6.24456770680526e-07	Photosystem II protein D1
CITRE_181g000020	2.2207664184628	1.00323892122851e-15	putative Superoxide dismutase [Cu-Zn]
CITRE_218g000090	1.69261416525151	0.000307869283884977	Cytochrome c biogenesis protein CcsA

## Sheet: CL LEAVES PLOIDY GENES
Gene	log2FoldChange	padj	annotation
CITRE_004g005850	0.963564915626981	1.32888410529838e-45	Hypothetical protein
CITRE_031g000300	-2.01878621445159	2.99468481641624e-44	putative Receptor-like protein 6
CITRE_005g018920	0.502892323671594	3.72099053518096e-32	Perakine reductase
CITRE_031g000120	-1.33602323768079	1.22584126801001e-26	putative LRRNT_2 domain-containing protein
CITRE_005g021470	-8.39865250584551	1.46533348328054e-25	conserved hypothetical protein
CITRE_004g021060	0.467992090314175	5.551754581138e-24	Glutathione transferase
CITRE_003g050740	4.63218529429112	9.32233614266558e-23	Hypothetical protein
CITRE_005g021120	8.4787288056605	4.31207349697048e-22	Hypothetical protein
CITRE_006g009980	-0.788551894894827	4.03738867564348e-21	conserved hypothetical protein
CITRE_008g012920	-2.19057955764369	2.26551443180045e-20	conserved hypothetical protein
CITRE_036g000110	8.20558955625702	2.48274788174602e-20	putative Transposase-associated domain-containing protein
CITRE_007g018980	0.841455306229221	8.37735966239856e-20	AAA domain-containing protein
CITRE_009g010300	-5.00241518701853	9.55373647203911e-19	Hypothetical protein
CITRE_003g048760	0.438345778619816	2.12085420571506e-15	Alcohol dehydrogenase class-3
CITRE_005g016480	-5.49451261196729	2.27794385898563e-15	conserved hypothetical protein
CITRE_003g045640	2.09595103164315	5.24706583017848e-14	conserved hypothetical protein
CITRE_004g028970	0.453273179352197	1.15552566755636e-13	putative protein-tyrosine-phosphatase MKP1
CITRE_006g013120	-0.51250091286047	1.29779739124329e-13	putative Uncharacterized acetyltransferase At3g50280
CITRE_005g028280	0.423947174615983	6.02130934435485e-13	Purine permease 1
CITRE_008g020300	-1.99179510905033	1.03951330456362e-12	putative Stemmadenine O-acetyltransferase
CITRE_003g000370	-0.385400671731906	1.15825647070567e-12	50S ribosomal protein L11%2C chloroplastic
CITRE_005g001470	0.422090641721286	1.15825647070567e-12	Auxin response factor
CITRE_005g009180	-4.67664283846051	1.71569609110512e-12	NB-ARC domain-containing protein
CITRE_007g007610	0.796125700552108	1.81989764200315e-12	Phosphoenolpyruvate carboxykinase (ATP)
CITRE_006g029510	-0.519250133976871	4.14413577505016e-12	conserved hypothetical protein
CITRE_003g017870	-2.50410897524719	9.40363905732129e-12	EP1-like glycoprotein 3
CITRE_002g018760	-4.54815778633116	1.16441693819581e-11	putative Geranylgeranyl transferase type-2 subunit beta 1
CITRE_001g006580	0.98218249181981	1.5990647470009e-11	Glutaredoxin domain-containing protein
CITRE_004g015700	-0.430656376129512	1.91698936020167e-11	putative Thylakoid lumenal 17.9 kDa protein%2C chloroplastic
CITRE_007g020460	0.583446382181737	3.52335434495777e-11	Metal transporter Nramp6
CITRE_003g045600	2.34495574064492	8.00418650905766e-11	conserved hypothetical protein
CITRE_002g027680	0.625666312874188	8.201372940647e-11	Protein DETOXIFICATION
CITRE_001g030180	0.854307750602732	8.73059937465489e-11	Galactinol--sucrose galactosyltransferase
CITRE_008g009640	-1.28361132047817	8.73059937465489e-11	conserved hypothetical protein
CITRE_008g013480	-2.51381364910875	1.53745805622083e-10	Ribosomal_S5_C domain-containing protein
CITRE_003g017890	-1.18708290372559	1.90244025422669e-10	Bulb-type lectin domain-containing protein
CITRE_003g028480	1.25098930914114	2.010542481344e-10	Hypothetical protein
CITRE_007g030440	3.45244177605092	3.81300684558482e-10	hypothetical protein
CITRE_001g029910	-0.388296161441104	5.29573207944155e-10	(S)-coclaurine N-methyltransferase
CITRE_008g026110	0.366723879293322	5.69259084420194e-10	E3 ubiquitin-protein ligase RZFP34
CITRE_008g023450	-0.509836356277062	6.47347809126991e-10	Rho GTPase-activating protein 1
CITRE_009g017520	-0.777398499815642	6.62672002972065e-10	Protein PUTATIVE RECOMBINATION INITIATION DEFECT 1
CITRE_007g006410	0.275597426885646	6.81195761286467e-10	BTB/POZ domain-containing protein SR1IP1
CITRE_006g009970	-0.889289642986134	1.09952213501956e-09	conserved hypothetical protein
CITRE_003g033890	-2.88685283472729	1.49395637276387e-09	Ribosomal_S5_C domain-containing protein
CITRE_003g037560	0.815347554977872	1.56377832663086e-09	PKS_ER domain-containing protein
CITRE_005g010290	-0.896314293888004	2.36163507504565e-09	conserved hypothetical protein
CITRE_003g046660	0.462560255467669	2.69476702218521e-09	conserved hypothetical protein
CITRE_005g006400	-1.15432468692369	4.59867594077444e-09	putative Disease resistance protein Roq1
CITRE_001g006410	-0.543205915306524	5.41780953023059e-09	Protein kinase domain-containing protein
CITRE_002g041020	-0.530675989955273	7.05785680818621e-09	conserved hypothetical protein
CITRE_004g017400	0.394086830210282	7.97287475542345e-09	Respiratory burst oxidase-like protein C
CITRE_001g024050	0.684386979471049	1.02502267093167e-08	PGG domain-containing protein
CITRE_009g014560	-1.5470179381564	1.57803214343489e-08	conserved hypothetical protein
CITRE_002g007810	2.50974559904846	1.58717258588734e-08	RNA exonuclease 4
CITRE_002g020540	-0.67703648846399	1.58717258588734e-08	Glucan endo-1%2C3-beta-D-glucosidase
CITRE_007g020470	0.788436015785332	1.71407848100847e-08	conserved hypothetical protein
CITRE_001g025910	-0.518389195843431	2.45415146661614e-08	Ribosomal_S10 domain-containing protein
CITRE_004g012220	1.25016436559152	2.61408770833511e-08	Hypothetical protein
CITRE_002g006540	-0.200443605513637	3.01739017832687e-08	Cysteine desulfurase
CITRE_008g003440	-0.733636765923999	3.2445098367928e-08	Serine carboxypeptidase-like 17
CITRE_003g039950	0.248853601958248	3.52618472782596e-08	putative UPF0481 protein At3g47200
CITRE_001g007590	2.06487673211932	5.52522521454727e-08	conserved hypothetical protein
CITRE_004g014250	-0.257055031739104	6.23410700559846e-08	Ferredoxin
CITRE_004g033600	0.388058253643355	8.47794774648053e-08	CaM_binding domain-containing protein
CITRE_003g045590	1.84918599797105	8.68483825141237e-08	conserved hypothetical protein
CITRE_001g028540	-0.534408602483403	9.32626451001617e-08	Thioredoxin-dependent peroxiredoxin
CITRE_002g026420	1.14221893760932	9.32626451001617e-08	Fe2OG dioxygenase domain-containing protein
CITRE_005g001480	0.41812651692186	9.34617519741798e-08	putative Mitogen-activated protein kinase kinase kinase 1
CITRE_009g022710	1.40322756551828	9.6934277781688e-08	Protein kinase domain-containing protein
CITRE_005g040250	-0.306380744695239	1.12323561579544e-07	Peptidylprolyl isomerase
CITRE_003g021230	0.512410517149896	1.26472773631315e-07	1%2C3-beta-glucan synthase
CITRE_004g006210	-0.342943007776889	1.62401258150609e-07	50S ribosomal protein L10%2C chloroplastic
CITRE_009g011840	0.455361678292872	1.62401258150609e-07	putative disease resistance RPP13-like protein 1
CITRE_003g032040	0.742347464232963	1.68580477199019e-07	ADP-ribosyl cyclase/cyclic ADP-ribose hydrolase
CITRE_004g027170	0.242918272368145	1.68580477199019e-07	CG-1 domain-containing protein
CITRE_004g032110	0.759225118545758	1.78349218352606e-07	Aa_trans domain-containing protein
CITRE_009g017840	0.227481473251801	2.21917178776841e-07	putative MACPF domain-containing protein At1g14780
CITRE_007g003550	0.804616637039278	2.3238560485368e-07	Cytochrome P450 90B1
CITRE_008g008850	0.321773213888659	2.3569445738797e-07	NmrA domain-containing protein
CITRE_004g021410	0.678256899472061	2.45565670685437e-07	Cytochrome P450 89A2
CITRE_003g051540	-0.208638482900951	2.47450674451651e-07	Ribosome-recycling factor%2C chloroplastic
CITRE_008g006640	0.897260441835007	2.47450674451651e-07	CCG-binding protein 1
CITRE_002g029460	0.288434100191492	2.52653473915427e-07	Salt stress root protein RS1
CITRE_005g028970	-0.353527813573477	4.11950749708028e-07	putative mitochondrial adenine nucleotide transporter BTL3
CITRE_004g002750	-0.246827234286475	4.27330182841219e-07	Lipoyl-binding domain-containing protein
CITRE_005g008240	-2.6011226834219	4.34809032957251e-07	S-adenosyl-L-methionine-dependent methyltransferase superfamily protein
CITRE_010g001860	0.520125095675094	4.34809032957251e-07	NB-ARC domain-containing protein
CITRE_002g038250	0.29728559541741	5.46327862898251e-07	Bromo domain-containing protein
CITRE_009g013980	0.957429295414957	5.46327862898251e-07	putative UPF0481 protein At3g47200
CITRE_002g032190	-0.486202769588923	5.4901644138517e-07	FAD-binding PCMH-type domain-containing protein
CITRE_006g013040	-0.930483818342123	5.59505303241222e-07	ELM2 domain-containing protein
CITRE_005g037720	-0.779142461317174	5.59570052619406e-07	putative Cytokinin dehydrogenase 5
CITRE_009g032270	-0.271953381838942	6.81838188510616e-07	2-dehydro-3-deoxyphosphooctonate aldolase
CITRE_008g030940	0.267937490015031	7.50562482661328e-07	conserved hypothetical protein
CITRE_007g013600	-0.272377196875103	7.53079303051645e-07	Photosynthetic NDH subunit of subcomplex B 3%2C chloroplastic
CITRE_007g026880	0.78658178703987	7.53079303051645e-07	NTM1-like
CITRE_005g031030	1.15091600688955	7.740759995149e-07	Aa_trans domain-containing protein
CITRE_010g001140	0.832793231436814	8.11417515995272e-07	NB-ARC domain-containing protein
CITRE_001g006680	-0.621581996678047	8.33707112056008e-07	Auxin-responsive protein
CITRE_006g002250	0.367310841591095	8.59611032608803e-07	putative disease resistance RPP13-like protein 1
CITRE_005g003470	2.30328284596733	8.72235038599528e-07	PGG domain-containing protein
CITRE_006g016440	-1.66536153450594	8.77440479992325e-07	putative Cytochrome P450 714A1
CITRE_002g035970	0.964503168533307	8.91586176418958e-07	conserved hypothetical protein
CITRE_002g040840	-0.203033655631514	8.91586176418958e-07	conserved hypothetical protein
CITRE_008g002620	0.201293726069484	9.15941163952527e-07	SNARE-interacting protein KEULE
CITRE_001g001260	1.49845756853164	1.01636548838355e-06	Peptidase A1 domain-containing protein
CITRE_004g015920	-1.31278518954206	1.03674457920333e-06	Hypothetical protein
CITRE_006g004940	-0.29440705683186	1.03674457920333e-06	Carotene epsilon-monooxygenase%2C chloroplastic
CITRE_002g024020	-0.317414854304602	1.23337471063183e-06	conserved hypothetical protein
CITRE_008g009330	0.165631814708666	1.25046003452748e-06	CRAL-TRIO domain-containing protein
CITRE_002g008460	0.503829271976165	1.27959725986238e-06	Galactinol--sucrose galactosyltransferase
CITRE_007g004850	1.31011720254487	1.40921005669266e-06	Peroxidase
CITRE_009g002320	0.562761842389547	1.62914364318266e-06	conserved hypothetical protein
CITRE_005g019700	0.499824640310599	1.6932402298074e-06	AAA domain-containing protein
CITRE_007g009010	0.142304149616487	1.85363533480828e-06	Polyadenylate-binding protein 2
CITRE_008g030150	-0.395971933204587	1.9890077483755e-06	conserved hypothetical protein
CITRE_005g008230	-2.63976562752045	2.17974899801159e-06	Loganic acid O-methyltransferase
CITRE_001g015160	-0.372863478044087	2.20310306238899e-06	Non-functional NADPH-dependent codeinone reductase 2
CITRE_005g040480	0.16772313150821	2.21407477609939e-06	SWI/SNF complex subunit SWI3B
CITRE_008g014620	0.824141477635143	2.39882616528352e-06	conserved hypothetical protein
CITRE_009g002230	0.692268899949807	2.39882616528352e-06	conserved hypothetical protein
CITRE_001g012220	-0.401206583252961	2.55042545780664e-06	GATA-type domain-containing protein
CITRE_007g003010	1.24033075629307	2.82268013391576e-06	S-adenosyl-L-methionine-dependent methyltransferase superfamily protein
CITRE_005g031370	0.261668585027455	3.20845450791411e-06	putative UDP-sugar pyrophosphorylase
CITRE_007g000250	0.569801398913263	3.3343332804349e-06	Protein PIN-LIKES 7
CITRE_001g000700	1.12984665533748	3.3653854410264e-06	putative protein kinase domain-containing protein
CITRE_008g011620	0.435145432505097	3.3653854410264e-06	conserved hypothetical protein
CITRE_004g018200	0.421135000893784	3.87162962443963e-06	BTB/POZ domain and ankyrin repeat-containing protein NPR1
CITRE_007g014370	0.83471756616975	4.02215050611603e-06	G-type lectin S-receptor-like serine/threonine-protein kinase CES101
CITRE_003g059300	0.169569457661064	4.28467321694134e-06	EGF-like domain-containing protein
CITRE_002g027280	-0.337762469928236	4.38159447782301e-06	conserved hypothetical protein
CITRE_004g018000	-0.250317506700387	4.73489221782453e-06	putative Polyamine oxidase 2
CITRE_006g004760	1.87060743892311	4.73489221782453e-06	Protein FAR1-RELATED SEQUENCE
CITRE_098g000020	0.346966971742336	4.73489221782453e-06	NB-ARC domain-containing disease resistance protein
CITRE_001g034050	0.294715114153517	4.95114475423959e-06	conserved hypothetical protein
CITRE_005g024480	2.28710049272485	5.1675090210786e-06	AB hydrolase-1 domain-containing protein
CITRE_006g002940	0.296283433301555	5.31569687064889e-06	putative Calreticulin
CITRE_007g033150	0.490226324569635	5.60614813176753e-06	Trehalose 6-phosphate phosphatase
CITRE_006g006140	-0.725468555920365	5.85757024023072e-06	ULP_PROTEASE domain-containing protein
CITRE_005g027170	-0.992825894147421	6.3741913023636e-06	BHLH domain-containing protein
CITRE_004g022320	0.835552091981721	6.39884364044665e-06	Phosphoinositide phospholipase C
CITRE_002g025010	0.313247514952249	6.50556385135684e-06	putative SHSP domain-containing protein
CITRE_002g007670	0.666360356806926	7.18866555104929e-06	putative methyltransferase TCM_000336
CITRE_002g038480	0.290622297623364	7.18866555104929e-06	Phytochrome
CITRE_003g006960	-0.274665674260017	7.87252173144969e-06	CBBY-like protein
CITRE_007g016730	0.465311352951978	8.22574960583304e-06	NB-ARC domain-containing protein
CITRE_007g031170	-0.425841794991333	8.23996488271215e-06	conserved hypothetical protein
CITRE_002g034250	-0.219185102569291	8.36704311300203e-06	BHLH domain-containing protein
CITRE_003g036210	0.454584792602005	8.36704311300203e-06	putative disease resistance RPP13-like protein 1
CITRE_010g001680	0.523997529614125	8.80466454614127e-06	AAA domain-containing protein
CITRE_002g037210	-0.326994258836254	9.30619997807291e-06	50S ribosomal protein L34%2C chloroplastic
CITRE_001g011060	0.76888479325504	9.47798569949202e-06	Glutathione hydrolase
CITRE_002g034730	-0.653535360751793	9.47798569949202e-06	Hypothetical protein
CITRE_003g045900	0.683467433190579	9.58194821991252e-06	AAA domain-containing protein
CITRE_005g029010	0.970535282294219	1.00328892165284e-05	Protein kinase domain-containing protein
CITRE_005g013480	0.270203258451811	1.10986382213335e-05	NB-ARC domain-containing disease resistance protein
CITRE_004g034900	-0.374664976260279	1.13313986481441e-05	putative 30S ribosomal protein 2%2C chloroplastic
CITRE_009g021330	1.08479345777574	1.13313986481441e-05	LRRNT_2 domain-containing protein
CITRE_007g025630	-0.72335074147211	1.2345935844015e-05	Hypothetical protein
CITRE_006g028960	-0.546706210477274	1.29233602797469e-05	Protein kinase domain-containing protein
CITRE_008g008880	0.915200222711563	1.37130117877014e-05	NmrA domain-containing protein
CITRE_002g020360	-2.64689396381699	1.38784203695474e-05	Pyrophosphate--fructose 6-phosphate 1-phosphotransferase subunit beta
CITRE_009g017430	0.286429741706495	1.50452927646496e-05	conserved hypothetical protein
CITRE_002g036720	1.35409900100676	1.5274840020534e-05	Glycosyltransferase
CITRE_006g005300	-0.316438296256527	1.54018711601852e-05	PDZ domain-containing protein
CITRE_006g009420	0.504927350278812	1.7630510163063e-05	putative Uncharacterized acetyltransferase At3g50280
CITRE_009g004060	-0.379550564787339	1.7630510163063e-05	Divinyl chlorophyllide a 8-vinyl-reductase%2C chloroplastic
CITRE_009g002310	0.521959445512935	1.80759413443877e-05	conserved hypothetical protein
CITRE_008g013200	1.22371294572576	1.87828489790164e-05	TF-B3 domain-containing protein
CITRE_005g021620	1.09596547255289	1.92343096478777e-05	NB-ARC domain-containing protein
CITRE_006g016590	-0.360455921085083	1.9686409916608e-05	50S ribosomal protein L17%2C chloroplastic
CITRE_005g037970	-0.707374910124778	2.13363864005045e-05	Agamous-like MADS-box protein AP3
CITRE_004g035230	2.69146796791475	2.17474226708385e-05	conserved hypothetical protein
CITRE_004g009140	0.580976731139743	2.32402963976676e-05	conserved hypothetical protein
CITRE_001g002030	-0.900809963027814	2.34559182009095e-05	conserved hypothetical protein
CITRE_041g000040	0.674111906609519	2.39869777775887e-05	putative disease resistance protein At3g14460
CITRE_020g000130	-1.24502804066191	2.47684686393047e-05	RING-type domain-containing protein
CITRE_002g011230	-0.464060553623573	2.56355782121753e-05	conserved hypothetical protein
CITRE_008g018520	0.783620624043431	2.75942131086035e-05	conserved hypothetical protein
CITRE_010g001880	0.609232094745139	2.79966770118848e-05	NB-ARC domain-containing protein
CITRE_003g015680	0.820517947669665	3.70533187258922e-05	conserved hypothetical protein
CITRE_050g000130	0.878573658900081	3.83837404574448e-05	conserved hypothetical protein
CITRE_005g005730	-1.85156144377094	4.07054871016515e-05	conserved hypothetical protein

## Sheet: CL LEAVES STRESS GENES
Gene	log2FoldChange	padj	annotation
CITRE_009g031280	1.4988290144694	2.99704355297144e-123	Protein-serine/threonine phosphatase
CITRE_009g029600	1.38916462561234	1.56173682672559e-111	conserved hypothetical protein
CITRE_001g017850	2.35285477127304	3.14664112674413e-110	NAC domain-containing protein
CITRE_001g029850	-4.29684462251474	1.07861206825857e-105	Heat shock protein
CITRE_003g008050	2.01082443285413	9.75201231486257e-80	Beta-amylase
CITRE_008g031070	-2.65192921666421	5.61248174089329e-73	SHSP domain-containing protein
CITRE_002g014760	-3.5821675995906	1.83446882054014e-72	SHSP domain-containing protein
CITRE_004g000740	1.28126223595304	1.31936444753398e-70	Protein-serine/threonine phosphatase
CITRE_009g006520	-0.885090282383533	1.04470605902991e-61	PHD_Oberon domain-containing protein
CITRE_005g037060	1.10011527457534	2.30756510609291e-58	conserved hypothetical protein
CITRE_008g005530	0.710280641346542	3.57444295953251e-58	BZIP domain-containing protein
CITRE_004g001720	0.768842688245532	2.33692796550372e-56	HMG box domain-containing protein
CITRE_004g033150	-0.587259390557084	6.25821652489619e-56	NAC domain-containing protein
CITRE_002g027070	-1.7878439787936	1.0282625831595e-55	10 kDa chaperonin%2C mitochondrial
CITRE_003g048090	0.885188188554473	8.6331629674192e-54	LisH domain-containing protein
CITRE_007g014660	-1.33528659440436	2.42640874093726e-50	hypothetical protein
CITRE_008g030590	2.44555537407853	3.89959542319522e-50	Protein-serine/threonine phosphatase
CITRE_003g012500	1.093301238732	1.44557831920697e-49	Two-component response regulator-like APRR1
CITRE_003g034880	-0.975248609832242	2.49169987043035e-49	Chlorophyll a-b binding protein%2C chloroplastic
CITRE_005g038570	2.43429669191626	3.39743440996115e-49	Snakin-2
CITRE_005g026230	0.79444126233131	8.0589061933391e-48	Calcium-transporting ATPase
CITRE_005g039170	1.35406118801043	1.06833937070463e-47	putative nucleoredoxin 2
CITRE_002g030660	-2.24857726488697	5.59457104889265e-47	Pentatricopeptide repeat-containing protein At2g35130
CITRE_001g030350	0.52047063205524	3.71239747798663e-46	Synaptotagmin-5
CITRE_004g026470	1.394447617114	5.37628279037359e-46	Ninja-family protein AFP1
CITRE_004g027430	0.834426595512613	5.45257201255143e-46	FCP1 domain-containing protein
CITRE_004g033480	0.864288249369643	8.00763726885342e-44	conserved hypothetical protein
CITRE_009g032760	1.8358235912828	1.5744480328696e-43	YTH domain-containing protein
CITRE_009g006150	-1.63553438019436	3.91169198941438e-43	Heat shock 70 kDa protein 8
CITRE_004g006900	-1.18276352410569	2.92350523945765e-42	Chlorophyll a-b binding protein%2C chloroplastic
CITRE_004g033470	0.819212253623445	2.10125468297277e-41	putative protein NEOXANTHIN-DEFICIENT 1
CITRE_004g032820	-0.607144799525318	2.00693223412202e-40	conserved hypothetical protein
CITRE_006g012390	-3.20565937345124	2.88779697428331e-40	SHSP domain-containing protein
CITRE_003g015200	-0.638762418114868	6.2046160619639e-39	UDENN domain-containing protein
CITRE_005g012400	0.929863876410019	7.10616116275944e-39	putative protein LNK3
CITRE_003g012440	0.903444184547874	1.77091600121004e-38	conserved hypothetical protein
CITRE_005g029600	-0.52181209331986	6.84405441354697e-38	conserved hypothetical protein
CITRE_002g040330	1.24880098111355	1.26641010650094e-37	conserved hypothetical protein
CITRE_002g023210	-0.644961114295931	1.70276249184625e-36	Glucose-1-phosphate adenylyltransferase
CITRE_009g030610	-0.91477606078851	1.71246347649921e-36	AAA domain-containing protein
CITRE_001g009100	-0.667307183146341	1.11167109022556e-35	putative U3 small nucleolar RNA-associated protein 11
CITRE_001g030160	0.765682569623861	1.98794497590328e-35	putative Calmodulin-like protein 7
CITRE_003g028720	0.79569403606323	5.81383285940511e-35	BRO1 domain-containing protein
CITRE_006g006890	-0.592207441445232	1.33393040862731e-34	putative Acylphosphatase
CITRE_002g015460	1.55672369213684	1.3736383452374e-34	AP2/ERF domain-containing protein
CITRE_002g003880	0.860200155667292	3.67657497923483e-34	Myb_DNA-bind_4 domain-containing protein
CITRE_003g056940	0.76515725362085	3.681172870169e-34	conserved hypothetical protein
CITRE_006g012040	1.20173783682405	1.91403468274824e-33	putative Bulb-type lectin domain-containing protein
CITRE_008g006450	-0.744307443672171	1.92678078027312e-33	Protein kinase domain-containing protein
CITRE_003g043290	0.999362567588114	7.93217818638299e-33	MFS domain-containing protein
CITRE_006g020170	-0.476787054607595	1.04406539356844e-32	Ubiquitin-conjugating enzyme E2 variant 1D
CITRE_009g006260	1.57022349071387	1.41179148391821e-32	40S ribosomal protein S24
CITRE_006g018230	4.67738680273691	1.82059518426308e-32	Late embryogenesis abundant protein 46
CITRE_003g057420	1.01066139708078	1.80780904669399e-31	Homeobox domain-containing protein
CITRE_004g030450	-1.13393921855203	1.98308849586239e-31	WAT1-related protein
CITRE_007g000510	0.935727584635542	2.11526223051484e-31	Alkyl transferase
CITRE_006g026930	-0.637515567405971	2.45185472135093e-31	Protein kinase domain-containing protein
CITRE_008g028300	-1.00870900017972	8.05731733648971e-31	L-ascorbate peroxidase
CITRE_008g015520	0.555703302161241	1.25437600666859e-30	Ubiquinol oxidase
CITRE_033g000090	-1.31267328639755	1.84807642971318e-30	putative Chlorophyll a-b binding protein CP24 10B%2C chloroplastic
CITRE_008g004230	-0.532872430323942	3.42866892600134e-30	putative E3 ubiquitin-protein ligase RHY1A
CITRE_006g013720	-1.48901881994664	3.78357751398921e-30	Chlorophyll a-b binding protein%2C chloroplastic
CITRE_009g026780	-0.433507476647132	4.57327409214086e-30	Acetohydroxy-acid reductoisomerase
CITRE_007g032510	0.707227267607714	8.04237636836459e-30	18S rRNA aminocarboxypropyltransferase
CITRE_008g026700	-1.09452129281475	2.5584128085076e-29	RuBisCO large subunit-binding protein subunit alpha%2C chloroplastic
CITRE_007g006230	0.797111067893455	6.36178605606102e-29	Protein DWD HYPERSENSITIVE TO UV-B 1
CITRE_001g021020	0.679328165375766	6.65298041416113e-29	Polyubiquitin
CITRE_005g037040	0.917079324302979	1.44355604769966e-28	conserved hypothetical protein
CITRE_003g001720	0.938534391850405	2.17219437113522e-28	AP2/ERF domain-containing protein
CITRE_003g058550	0.636087210784914	2.17219437113522e-28	BZIP domain-containing protein
CITRE_007g018460	-0.79459266460175	7.16462752848092e-28	H(+)-exporting diphosphatase
CITRE_002g019820	0.498842777306939	1.35675697633103e-27	Hexosyltransferase
CITRE_008g019140	0.413875301192757	1.82288357224978e-27	EF-hand domain-containing protein
CITRE_003g047620	1.83592136736475	3.08150789702252e-27	TDBD domain-containing protein
CITRE_002g027250	0.835164293723472	3.25164904089616e-27	conserved hypothetical protein
CITRE_119g000130	-0.907012213043144	6.83504447540071e-27	H(+)-exporting diphosphatase
CITRE_007g005830	-0.769748729974314	7.8532743383095e-27	Cyclin N-terminal domain-containing protein
CITRE_002g008430	1.71371340093997	8.8801936886206e-27	conserved hypothetical protein
CITRE_005g035740	-0.492746305177476	1.44523470092805e-26	26S proteasome non-ATPase regulatory subunit 14
CITRE_005g025590	0.815129408454115	1.59513431919497e-26	Alkaline/neutral invertase A%2C mitochondrial
CITRE_003g031210	-1.29170646829723	1.72197442867164e-26	SWIM-type domain-containing protein
CITRE_004g027380	-0.934050760435352	1.89350760453644e-26	Chlorophyll a-b binding protein%2C chloroplastic
CITRE_002g010710	-0.722914391303746	2.48352366632292e-26	Methyltransf_11 domain-containing protein
CITRE_002g031080	-0.737038545810217	2.48352366632292e-26	conserved hypothetical protein
CITRE_007g022450	0.776102767715154	4.00894554951872e-26	B box-type domain-containing protein
CITRE_004g035010	-0.843627715977523	8.14243067680996e-26	Beta-glucosidase 13
CITRE_001g028430	-1.32465265632329	9.38352257784058e-26	20 kDa chaperonin%2C chloroplastic
CITRE_005g035310	0.929395739993756	9.70336745432113e-26	BZIP domain-containing protein
CITRE_004g000790	0.968844098136253	1.56415165316849e-25	conserved hypothetical protein
CITRE_005g035390	-0.79682144691635	1.76251470680009e-25	ABA 8'-hydroxylase
CITRE_004g028930	-0.468334046692818	1.78232559402933e-25	Protein kinase domain-containing protein
CITRE_007g000190	-0.557555579914513	1.94302262072802e-25	Plant intracellular Ras-group-related LRR protein 4
CITRE_006g007570	2.10458573262779	2.03216130115103e-25	conserved hypothetical protein
CITRE_003g048600	-1.00801525655881	2.07943586009994e-25	PS1 reaction center subunit III
CITRE_009g032570	-0.862091523714915	2.07943586009994e-25	MFS domain-containing protein
CITRE_006g016900	-0.971303559537211	3.66142334699042e-25	putative Cactin_mid domain-containing protein
CITRE_002g028020	1.10451135575631	5.18708541144594e-25	Hypothetical protein
CITRE_003g056920	0.721150743175302	6.37181755257909e-25	Protein LATE ELONGATED HYPOCOTYL
CITRE_003g053620	0.881733846639818	8.79336085909287e-25	ABC-type xenobiotic transporter
CITRE_002g009330	1.42505018884387	9.02503926848362e-25	RING-type E3 ubiquitin transferase
CITRE_003g043620	0.46293850986281	9.0913201338965e-25	conserved hypothetical protein
CITRE_004g018730	-1.00950553455027	9.98025662216054e-25	SAM_MT_RSMB_NOP domain-containing protein
CITRE_007g019810	0.811407905719168	1.0190792307894e-24	DRBM domain-containing protein
CITRE_009g032330	0.541633397487858	1.99461026317201e-24	putative Defective in cullin neddylation protein
CITRE_003g025320	-1.99025205789942	2.1162875496705e-24	SHSP domain-containing protein
CITRE_008g004300	-1.23356723968786	3.71220857577402e-24	conserved hypothetical protein
CITRE_006g005880	0.994373475864078	6.00766245933175e-24	HGSNAT_cat domain-containing protein
CITRE_002g017930	0.871371588145852	6.50070655335857e-24	G-type lectin S-receptor-like serine/threonine-protein kinase At4g03230
CITRE_002g028900	-1.14784565500425	1.16456869854541e-23	Zinc finger protein CONSTANS-LIKE 16
CITRE_004g024240	-0.847247770424588	1.76273594777332e-23	Transcription factor SRM1
CITRE_006g012030	1.13007561501563	1.96714328228814e-23	Hypothetical protein
CITRE_002g020460	-0.69867122369743	2.02802180203071e-23	MFS domain-containing protein
CITRE_009g031640	1.54571159372508	2.088005585001e-23	Protein-serine/threonine phosphatase
CITRE_005g029920	1.57226667530908	2.32959168032138e-23	putative 6-phosphogluconolactonase 1
CITRE_003g026930	0.90512040699686	2.91344158778011e-23	putative protein REVEILLE 7
CITRE_049g000050	3.94037935513432	3.31331570428807e-23	Hypothetical protein
CITRE_008g006400	-0.76841358531428	3.5064076729539e-23	HTH myb-type domain-containing protein
CITRE_006g025890	-0.919420833585912	3.99617490871854e-23	30S ribosomal protein 3%2C chloroplastic
CITRE_009g015220	-0.507954752082319	4.69450718452461e-23	LisH domain-containing protein
CITRE_001g025420	0.470763678754661	5.2513409668105e-23	putative WRKY transcription factor 20
CITRE_005g038620	0.841149804286168	6.02400807856165e-23	conserved hypothetical protein
CITRE_006g015160	-0.603536123955787	7.1578193836159e-23	conserved hypothetical protein
CITRE_005g028950	0.840570529137579	9.76742321819134e-23	TMEM135_C_rich domain-containing protein
CITRE_007g028150	0.355439246056016	1.17995361902651e-22	NAC domain-containing protein
CITRE_001g018810	0.483719002156415	1.20633885575429e-22	B box-type domain-containing protein
CITRE_002g007900	1.82569870845935	1.43053639854953e-22	Transcription factor WER
CITRE_001g007650	-1.45437770663997	1.56844297594941e-22	Protein NRT1/ PTR FAMILY 6.2
CITRE_001g032420	0.531201656725919	1.70749748119796e-22	NADPH--cytochrome P450 reductase
CITRE_002g014300	1.11582254855058	2.00022245027951e-22	conserved hypothetical protein
CITRE_006g024450	-0.616016806657461	2.42894350311765e-22	putative fructokinase-6%2C chloroplastic
CITRE_003g055530	1.735457484763	3.12055961003471e-22	PlsC domain-containing protein
CITRE_008g029350	0.524400620462323	3.14830575297086e-22	Histone H4
CITRE_006g024620	1.33013146252735	3.84028063718566e-22	conserved hypothetical protein
CITRE_004g033570	-0.608990764789448	4.05320960996681e-22	Brix domain-containing protein
CITRE_009g031880	-1.7005955008697	4.99836668695865e-22	LOB domain-containing protein
CITRE_008g011520	0.959933906596422	5.49636589661306e-22	EF-hand domain-containing protein
CITRE_006g008760	0.7516023344573	1.18690343899724e-21	hypothetical protein
CITRE_003g001110	-0.628691143522647	1.18951054241799e-21	Luminal-binding protein 5
CITRE_002g029100	-0.545286153095368	1.26192335819917e-21	Pyruvate kinase
CITRE_003g029100	1.38051622905858	1.47844531998639e-21	conserved hypothetical protein
CITRE_004g006390	0.39904084435262	1.52525535794659e-21	putative Nuclear transcription factor Y subunit B-8
CITRE_009g025180	-1.92281497150079	1.68714410027677e-21	AP2/ERF domain-containing protein
CITRE_001g029560	-0.735835248914671	1.72435937755314e-21	Thermospermine synthase ACAULIS5
CITRE_001g009470	0.698722510253607	1.85410088165063e-21	Pentatricopeptide repeat-containing protein At5g25630
CITRE_007g019590	0.755571181549748	1.85410088165063e-21	conserved hypothetical protein
CITRE_219g000030	1.04817268135782	1.99837137840526e-21	Hypothetical protein
CITRE_006g022620	-0.710929833263536	2.51119938100096e-21	Magnesium-protoporphyrin IX monomethyl ester (oxidative) cyclase
CITRE_009g001560	0.596930053181286	3.39156932177137e-21	Protein high chlorophyll fluorescent 107
CITRE_007g031190	0.505614837133792	3.45998456253893e-21	Stress enhanced protein 2%2C chloroplastic
CITRE_006g029630	1.33931745828324	3.48576009368579e-21	Pentatricopeptide repeat-containing protein At5g39350
CITRE_001g023590	1.64207843120532	4.87953915900506e-21	WHy domain-containing protein
CITRE_004g000360	3.93321281302794	5.53034386544469e-21	UDP-glycosyltransferase 76B1
CITRE_004g032920	-0.81130298766949	2.56015778210527e-20	conserved hypothetical protein
CITRE_003g013150	-1.64337275017625	2.80223206220835e-20	Clp R domain-containing protein
CITRE_006g015110	-0.729325440937524	2.83859185817709e-20	Protein SCAR
CITRE_008g029190	-0.641939520793706	3.24249368952377e-20	Histone H2B
CITRE_002g001910	0.630822754821752	3.3180455436378e-20	conserved hypothetical protein
CITRE_003g058600	-0.634788090740801	3.63527582163201e-20	CAAD domain-containing protein
CITRE_002g021760	0.72097679052956	4.59158076441272e-20	SAM domain-containing protein
CITRE_008g014410	-1.36199555805176	4.94572268964273e-20	Chlorophyll a-b binding protein%2C chloroplastic
CITRE_004g019820	-1.25976427983497	5.72336772986513e-20	Peptidylprolyl isomerase
CITRE_006g016040	0.736681358623284	6.86714758205254e-20	Protein kinase domain-containing protein
CITRE_008g016760	1.32750829460422	7.29463417774614e-20	Fe2OG dioxygenase domain-containing protein
CITRE_008g001580	0.375236341089502	8.16666181321725e-20	V-type proton ATPase subunit B 1
CITRE_002g040400	-0.547842056739514	8.45692637028405e-20	Short-chain dehydrogenase/reductase SDRA
CITRE_002g035030	1.31305719893246	8.5597485660269e-20	DUF4408 domain-containing protein
CITRE_004g029160	1.3974310805083	8.7146618111505e-20	RING-type domain-containing protein
CITRE_001g004960	0.504088280159057	1.36672935724133e-19	Exostosin domain-containing protein
CITRE_008g029830	0.883488203938699	1.43041192492933e-19	Outer envelope pore protein 16%2C chloroplastic
CITRE_007g013900	0.381679980435679	1.50707268839701e-19	MFS domain-containing protein
CITRE_008g007680	-0.793311428190802	1.68303877172242e-19	Cytochrome c biogenesis protein CCS1%2C chloroplastic
CITRE_002g005730	2.58174323580963	2.14897006573229e-19	putative Alcohol acyl transferase 1 allele RGb
CITRE_006g015210	-1.1245870528844	2.30735676793301e-19	putative protein LURP-one-related 15
CITRE_008g023260	-0.444848107005812	2.80994795523268e-19	putative Mechanosensitive ion channel protein 1%2C mitochondrial
CITRE_008g030830	1.0304740423663	2.82396479978727e-19	Protein THYLAKOID ASSEMBLY 8-like%2C chloroplastic
CITRE_002g000280	-1.07893327709237	3.05591542199227e-19	Chaperonin 60 subunit beta 3%2C chloroplastic
CITRE_003g034100	0.757800673418565	3.40292353743905e-19	conserved hypothetical protein
CITRE_005g006240	-0.494460821843961	3.54848128651604e-19	putative Multiple organellar RNA editing factor 1%2C mitochondrial
CITRE_006g005410	1.53393419746996	4.52258907782663e-19	Glycosyltransferase
CITRE_008g004310	-0.452326311252762	4.52915453483754e-19	LRRcap domain-containing protein
CITRE_003g019160	1.14608309044413	4.84711133923977e-19	Hypothetical protein
CITRE_002g029890	1.14573742839587	4.8894048704163e-19	Phosphatidate cytidylyltransferase%2C mitochondrial
CITRE_002g037890	0.743115375551581	5.04168097236524e-19	RING-type E3 ubiquitin transferase
CITRE_002g026840	-0.419958171390438	5.67228367093874e-19	conserved hypothetical protein
CITRE_004g014360	-1.03228786535489	5.87370763468737e-19	Aluminum-activated malate transporter 12
CITRE_004g029120	0.845367120384235	5.87370763468737e-19	Chloroplast sensor kinase%2C chloroplastic
CITRE_003g023320	-0.765141799140517	6.34158823539841e-19	Elongation factor 2
CITRE_002g035470	-0.444182681805403	6.42180057853306e-19	AB hydrolase-1 domain-containing protein
CITRE_006g021950	-0.420109520179075	6.51940558718695e-19	Pyruvate kinase 2%2C cytosolic
CITRE_008g026020	0.590233883995778	6.51940558718695e-19	Zinc finger protein ZAT5
CITRE_005g007480	0.847167683887778	6.86242872537839e-19	conserved hypothetical protein
CITRE_009g017080	-0.619312744874882	7.31621692726344e-19	RRM domain-containing protein
CITRE_003g052880	1.75904100147053	7.94647130159028e-19	NAB domain-containing protein
CITRE_002g021680	0.456300049330511	8.13972121292227e-19	putative Pentatricopeptide repeat-containing protein At5g65560
CITRE_007g028120	0.630612812421226	8.15096737983095e-19	Hydroxycinnamoyl-CoA shikimate/quinate hydroxycinnamoyl transferase
CITRE_002g007340	-1.3314038925337	9.11352137889539e-19	WAT1-related protein
CITRE_008g011950	-0.590703434088901	9.93980075705439e-19	Peptidyl-prolyl cis-trans isomerase
CITRE_006g017050	0.744179788849009	1.17584403555702e-18	conserved hypothetical protein
CITRE_003g053170	0.446406769368491	1.21549455396265e-18	ZT_dimer domain-containing protein
CITRE_001g007710	1.1849570020493	1.4293714460549e-18	conserved hypothetical protein
CITRE_002g021720	-1.34477590455384	1.50609763688332e-18	Chlorophyll a-b binding protein 151%2C chloroplastic
CITRE_003g057920	0.584547861596182	1.95423882426477e-18	Cyclic pyranopterin monophosphate synthase
CITRE_007g008650	1.0526280054482	1.99119403629503e-18	Protein DETOXIFICATION
CITRE_001g023580	0.409230694814276	2.0253365611371e-18	Polyadenylate-binding protein RBP45C
CITRE_003g020540	-0.963930289830192	2.08685564653988e-18	putative protein SRG1
CITRE_001g013350	0.703165470804462	2.44303978585882e-18	conserved hypothetical protein
CITRE_002g021920	1.07957149278146	3.00248578540706e-18	putative Exosome complex component RRP45A
CITRE_009g009500	0.761748821426674	3.00248578540706e-18	conserved hypothetical protein
CITRE_002g001660	0.568906927635544	3.13123696039445e-18	RING-type E3 ubiquitin transferase
CITRE_003g028110	-0.65994706100932	3.85002706914757e-18	putative metal-nicotianamine transporter YSL5
CITRE_008g001820	-0.780325587631636	3.89034971318615e-18	Aquaporin PIP2-7
CITRE_005g036780	0.681594211148869	4.0792765885413e-18	Uncharacterized membrane protein At1g75140
CITRE_009g032040	0.95445983779004	4.89602932532416e-18	conserved hypothetical protein
CITRE_004g015810	-0.432591177216201	5.69845910891375e-18	Proteasome subunit beta type-1
CITRE_009g011800	-0.611871724550658	6.27036030952524e-18	Haloacid dehalogenase-like hydrolase domain-containing protein At2g33255
CITRE_004g020260	1.27843533142648	7.96575234147371e-18	Protein DETOXIFICATION
CITRE_002g027160	0.825825725050719	8.32991734332087e-18	conserved hypothetical protein
CITRE_002g013340	-0.925520770519637	9.69702704689965e-18	conserved hypothetical protein
CITRE_001g017960	-0.549855656247109	9.80906722323764e-18	Methyltransf_11 domain-containing protein
CITRE_002g032620	-0.73953928712068	1.01668061995599e-17	KxDL domain-containing protein
CITRE_002g038730	-1.30856628219918	1.02236377387201e-17	Chlorophyll a-b binding protein 3C%2C chloroplastic
CITRE_008g030440	0.375187515212095	1.03380004467115e-17	conserved hypothetical protein
CITRE_009g006470	-0.433928875644289	1.0362219000902e-17	VOC domain-containing protein
CITRE_004g006750	0.363293690840047	1.1335672152718e-17	conserved hypothetical protein
CITRE_031g000460	0.869054753735256	1.16067760711722e-17	Nuclear factor Y%2C subunit B3
CITRE_008g003260	-1.77416262898997	1.27795281179341e-17	putative zinc metallopeptidase EGY3%2C chloroplastic
CITRE_009g026670	-0.431067986556794	1.39406763418721e-17	Conserved oligomeric Golgi complex subunit 7
CITRE_001g005290	0.745253647644138	1.46435199587486e-17	putative Lachrymatory-factor synthase
CITRE_002g011290	-0.634481951818473	1.46986018399445e-17	putative ATP-dependent zinc metalloprotease FTSH 2%2C chloroplastic
CITRE_008g024450	-3.5661324017596	1.61956816413264e-17	putative 18.5 kDa class I heat shock protein
CITRE_002g032560	0.484888382024643	1.67101264806236e-17	RING-type domain-containing protein
CITRE_007g002520	-0.788265411289545	2.03691884527666e-17	conserved hypothetical protein
CITRE_005g004370	-0.582108521779414	2.08694156363312e-17	60S ribosomal protein L3-2
CITRE_003g042070	-0.604355807199358	2.14958080225967e-17	Calreticulin-3
CITRE_004g025350	0.616903358093283	2.45896385828486e-17	putative Importin N-terminal domain-containing protein
CITRE_005g026340	-1.12590031084743	2.69564870850175e-17	LIM domain-containing protein WLIM1
CITRE_001g016400	0.584662865642328	2.99026973257533e-17	conserved hypothetical protein
CITRE_002g038700	-1.52234965897502	3.22619062266426e-17	Chlorophyll a-b binding protein 3C%2C chloroplastic
CITRE_001g033050	0.713449623892601	3.24018173992758e-17	conserved hypothetical protein
CITRE_006g012090	-1.00633150031908	4.21369037231846e-17	Dynein light chain
CITRE_009g024010	0.678564950199368	4.38601944004502e-17	conserved hypothetical protein
CITRE_007g016380	-0.637501038519649	4.3963788161854e-17	putative Eukaryotic translation initiation factor 3 subunit I
CITRE_001g027800	0.497525835924382	4.52691756236949e-17	putative WPP domain-interacting protein 2
CITRE_003g043770	0.554229310349352	4.52691756236949e-17	BHLH domain-containing protein
CITRE_003g048590	-0.604488809568318	4.54141712148711e-17	conserved hypothetical protein
CITRE_007g024110	-0.364153763434696	4.82171397149612e-17	H(+)-exporting diphosphatase
CITRE_002g041110	0.610035933812553	5.1728754814039e-17	putative Heavy metal-associated isoprenylated plant protein 7
CITRE_009g021710	0.715999532932078	5.1728754814039e-17	tRNA_int_end_N2 domain-containing protein
CITRE_001g028320	0.874880349933618	5.20443066929189e-17	Tify domain-containing protein
CITRE_003g051460	-0.741275594604519	5.37267384045191e-17	Photosystem I reaction center subunit II%2C chloroplastic
CITRE_004g029710	-0.478760113336902	5.83319297695797e-17	ATP citrate synthase
CITRE_001g010170	-0.478408827550307	5.95032237333939e-17	putative protein unc-13
CITRE_009g032420	0.852905128236083	5.97061758702282e-17	CBFD_NFYB_HMF domain-containing protein
CITRE_002g020640	0.442894711106941	6.19604742544095e-17	RING-type domain-containing protein
CITRE_003g062170	0.641049414805025	6.19604742544095e-17	conserved hypothetical protein
CITRE_001g017750	-1.69803427417258	6.45628109650143e-17	NADPH-protochlorophyllide oxidoreductase
CITRE_017g000110	-0.625176252757653	6.45628109650143e-17	conserved hypothetical protein
CITRE_002g013780	0.593482490901064	6.49140128423081e-17	Chloride channel protein
CITRE_004g022610	-0.882580168036685	6.49140128423081e-17	FAD-binding PCMH-type domain-containing protein
CITRE_002g009120	0.693429644052032	8.97174642370336e-17	conserved hypothetical protein
CITRE_008g026620	0.450830048254141	1.08601874398997e-16	AMPKBI domain-containing protein
CITRE_005g034920	0.862551683621576	1.11475020253784e-16	Cysteine proteinase RD21A
CITRE_003g000780	-0.357213560270219	1.14787489255793e-16	Rab GTPase-activating protein 22
CITRE_002g040030	-0.555883198805689	1.15396604995501e-16	Calcium permeable stress-gated cation channel 1
CITRE_050g000270	-0.408644764994643	1.22676580132617e-16	Phosphoglucan phosphatase DSP4%2C amyloplastic
CITRE_004g015960	0.925635526870095	1.26188624599172e-16	HVA22-like protein
CITRE_001g031550	-0.66164733533578	1.32426643579388e-16	SHSP domain-containing protein
CITRE_001g029570	-0.820970692372516	1.38823344462287e-16	conserved hypothetical protein
CITRE_009g001640	0.567147732235559	1.50416994629832e-16	Usp domain-containing protein
CITRE_003g005110	1.6322356143432	1.58065714013936e-16	RING-type domain-containing protein
CITRE_006g009760	-0.614331045239712	1.58139336696258e-16	Diaminopimelate epimerase%2C chloroplastic
CITRE_008g000280	0.671548931907726	1.64078604707897e-16	putative Exopolygalacturonase
CITRE_001g017730	-0.652405792932024	1.69613614719699e-16	Brix domain-containing protein
CITRE_003g044640	0.564028468462089	1.73259660243734e-16	putative Phosphoenolpyruvate carboxykinase (ATP)
CITRE_006g029660	-0.729535367209866	1.73259660243734e-16	Clp R domain-containing protein
CITRE_008g008980	-0.986135340464448	1.78313448375204e-16	Glucose-1-phosphate adenylyltransferase
CITRE_005g026210	0.455006225907594	1.84795028211243e-16	conserved hypothetical protein
CITRE_009g005900	0.346192309164936	1.91852051865061e-16	Chloride channel protein
CITRE_005g040050	0.860201868066013	1.93497323951959e-16	Pentatricopeptide repeat-containing protein At2g01860
CITRE_008g029170	-0.450137759943643	1.93501910346933e-16	40S ribosomal protein S15a-1
CITRE_002g034280	-0.88343173109779	2.52444792602439e-16	Oxygen-evolving enhancer protein 3%2C chloroplastic
CITRE_008g024890	1.64038459849563	2.76721920346426e-16	Aa_trans domain-containing protein
CITRE_003g061220	-1.01726915917437	2.86006690513476e-16	conserved hypothetical protein
CITRE_005g017590	-0.76319209251541	2.91923240435195e-16	conserved hypothetical protein
CITRE_009g031630	0.63928371549686	2.93568732898372e-16	PABS domain-containing protein
CITRE_007g012960	-1.15524891600716	2.93855960332874e-16	GDSL esterase/lipase APG
CITRE_001g016850	-0.407726726572216	2.95254811081555e-16	putative bifunctional methylthioribulose-1-phosphate dehydratase/enolase-phosphatase E1
CITRE_007g029180	-0.479882427513178	2.95254811081555e-16	Ribosomal_L18e/L15P domain-containing protein
CITRE_008g020240	0.841902405870822	3.0133840410368e-16	putative GRF1-interacting factor 1
CITRE_005g004140	-0.566431030588848	3.16587213968901e-16	Phosphoribosylamine--glycine ligase
CITRE_001g013360	0.481416693726216	3.58837692933689e-16	putative S5A_REDUCTASE domain-containing protein
CITRE_002g012840	0.612008611434952	4.25117227050469e-16	DUF4210 domain-containing protein
CITRE_004g006480	3.33282686485725	4.27700761224953e-16	Low temperature-induced protein lt101.1
CITRE_007g032890	0.508815228604771	4.30405921985078e-16	putative Disease resistance protein RGA2
CITRE_003g057870	0.586070140444068	4.35222183276299e-16	BHLH domain-containing protein
CITRE_002g026330	0.521121126390646	4.44324659287616e-16	PGG domain-containing protein
CITRE_005g035610	-0.79048917470894	4.54345455693452e-16	conserved hypothetical protein
CITRE_002g033090	0.897487392523392	5.09377066427967e-16	conserved hypothetical protein
CITRE_005g033160	-0.828492347445288	5.43655877112487e-16	conserved hypothetical protein
CITRE_006g001120	0.750967743244082	5.8086117652886e-16	conserved hypothetical protein
CITRE_007g017280	1.162124519873	6.2760582849914e-16	conserved hypothetical protein
CITRE_001g010440	1.25357332840613	6.59002404469272e-16	Protein-serine/threonine phosphatase
CITRE_006g011720	-0.656134502589219	6.59917379172826e-16	NADPH-dependent aldo-keto reductase%2C chloroplastic
CITRE_007g009370	0.424286760903766	6.71837040471583e-16	VQ domain-containing protein
CITRE_003g005190	0.600977785163886	9.18778094790264e-16	RING-type domain-containing protein
CITRE_007g016160	0.921811157960817	9.23826161809294e-16	ADP%2CATP carrier protein
CITRE_006g005700	0.476247112873338	1.12626267426652e-15	Ras-related protein RABE1c
CITRE_003g059840	0.70909566059582	1.16475970182714e-15	conserved hypothetical protein
CITRE_009g021500	-0.425990957940945	1.19544719240026e-15	Cytochrome P450 71D11
CITRE_004g000780	0.785331850320046	1.2012605641513e-15	conserved hypothetical protein
CITRE_002g006880	0.457894827879521	1.21071385867965e-15	Non-specific serine/threonine protein kinase
CITRE_008g002340	-1.02498016703283	1.27424388701971e-15	PLCXc domain-containing protein
CITRE_004g026390	-0.401533633712364	1.33810947559789e-15	Ubiquinone biosynthesis protein COQ4%2C mitochondrial
CITRE_006g026530	0.6310007616371	1.34021325390205e-15	Zinc finger protein CONSTANS-LIKE 2
CITRE_009g024490	-0.652925434735308	1.43234524280063e-15	BHLH domain-containing protein
CITRE_005g014720	-1.15927559518635	1.46704176801424e-15	CobW C-terminal domain-containing protein
CITRE_008g004500	0.763375760076632	1.59384905012529e-15	conserved hypothetical protein
CITRE_001g010940	-0.340706017569772	1.62655418731097e-15	Phosphatidylglycerophosphate phosphatase PTPMT1
CITRE_002g035560	0.412028879518087	1.62655418731097e-15	Splicing factor U2af large subunit
CITRE_004g000170	0.58800012620708	1.62655418731097e-15	Telomere repeat-binding protein 4
CITRE_001g000550	-1.00014174651151	1.65109997564979e-15	PAP_fibrillin domain-containing protein
CITRE_001g035410	-0.563124508439858	1.81405464747845e-15	RING-type domain-containing protein
CITRE_004g007970	-1.17036797637218	1.81405464747845e-15	ABC transporter domain-containing protein
CITRE_008g030600	0.633455752121023	1.81405464747845e-15	Methylsterol monooxygenase 2-2
CITRE_006g019800	0.425865476976602	1.88306724948099e-15	Protein kinase domain-containing protein
CITRE_079g000060	-1.03705046437444	2.02115740360347e-15	PLCXc domain-containing protein
CITRE_002g020140	3.09305874005999	2.10003983451524e-15	conserved hypothetical protein
CITRE_003g005310	0.844898524057459	2.15828300927093e-15	putative 1-deoxy-D-xylulose 5-phosphate reductoisomerase%2C chloroplastic
CITRE_002g004950	0.527830964628914	2.18942877863903e-15	putative Sacchrp_dh_NADP domain-containing protein
CITRE_003g040880	0.471779135092383	2.23280616378459e-15	conserved hypothetical protein
CITRE_007g007400	0.515515808936848	2.28649534461648e-15	Cysteine desulfurase
CITRE_008g006340	-1.87504637374804	2.41695259377145e-15	PPIase cyclophilin-type domain-containing protein
CITRE_001g001150	0.339607297865963	2.65470708785905e-15	putative Transcription initiation factor TFIID subunit 10
CITRE_003g052060	1.85269315121684	2.74142482624638e-15	EID1-like F-box protein 3
CITRE_004g024400	0.431709444384263	2.90563935832122e-15	AP2/ERF domain-containing protein
CITRE_003g026970	0.418128342565228	3.26173497426226e-15	Cyclic nucleotide-binding domain-containing protein
CITRE_008g029360	-0.48831448076957	3.26173497426226e-15	Histone H4
CITRE_008g004740	2.46861537469854	3.27464930994099e-15	Glycosyltransferase
CITRE_003g048260	0.548014636971041	3.34515391963019e-15	Alba domain-containing protein
CITRE_004g035180	1.06258943175456	3.42430457634373e-15	conserved hypothetical protein
CITRE_004g020630	0.842525026859425	4.11282303798059e-15	CRAL-TRIO domain-containing protein
CITRE_009g003320	0.442846466888529	4.3342485626965e-15	ULP_PROTEASE domain-containing protein
CITRE_003g053940	0.767904962096371	4.45880672939086e-15	O-methyltransferase 1%2C chloroplastic
CITRE_008g028940	-0.475617298910079	5.13647797767221e-15	60S ribosomal protein L35
CITRE_001g014830	1.54663081219044	5.34523466795109e-15	Hypothetical protein
CITRE_004g031580	0.46275287857172	5.34523466795109e-15	conserved hypothetical protein
CITRE_006g015690	0.585837301877648	5.56760444012694e-15	Protein kinase domain-containing protein
CITRE_006g007620	0.321509950409638	5.97659579968188e-15	V-type proton ATPase subunit G
CITRE_004g006000	0.574407069789554	6.30615688361823e-15	conserved hypothetical protein
CITRE_009g023760	0.827785273355129	6.42045915729288e-15	Tr-type G domain-containing protein
CITRE_008g024240	0.922629900774229	6.5522134070584e-15	conserved hypothetical protein
CITRE_003g006800	0.336847765518622	6.75899147962662e-15	ATG16 domain-containing protein
CITRE_009g029910	-0.536388919219813	6.97039108326439e-15	conserved hypothetical protein
CITRE_007g031970	0.702900881783157	7.25503810154536e-15	conserved hypothetical protein
CITRE_009g018560	0.738195719962077	7.76944565701882e-15	conserved hypothetical protein
CITRE_002g000170	-0.63596179466627	7.84099305189595e-15	NusB domain-containing protein
CITRE_007g022150	0.964458228483027	7.942170802042e-15	PORR domain-containing protein
CITRE_009g006250	0.865032441389462	7.97331628664345e-15	Non-specific serine/threonine protein kinase
CITRE_006g005910	-0.569190099479354	8.05711290170827e-15	conserved hypothetical protein
CITRE_005g032970	-0.407180389251422	8.0721800312717e-15	60S ribosomal protein L3
CITRE_002g004910	1.14804233102869	9.39740566541765e-15	conserved hypothetical protein
CITRE_006g019820	0.637321583164628	9.43296449750967e-15	Ipi1_N domain-containing protein
CITRE_009g031360	1.05000849145186	9.45194113180018e-15	Cyclic nucleotide-binding domain-containing protein
CITRE_004g012770	-0.419160470940049	9.92880792772641e-15	putative ABC transporter I family member 6%2C chloroplastic
CITRE_001g029690	-0.603775220259406	1.01595204745664e-14	Mitochondrial carrier protein
CITRE_009g004270	0.353464748192545	1.01595204745664e-14	RING-CH-type domain-containing protein
CITRE_002g040000	0.43614420623961	1.09374555545081e-14	putative Glycosyltransferase BC10
CITRE_007g016490	0.784198418215065	1.25092515747312e-14	Photolyase/cryptochrome alpha/beta domain-containing protein
CITRE_001g000190	0.504600418033399	1.35730902289765e-14	Protein kinase domain-containing protein
CITRE_003g036020	-0.450660181421529	1.44725972387358e-14	Guanosine nucleotide diphosphate dissociation inhibitor
CITRE_001g028230	1.00371538383784	1.52153632902365e-14	Protein LAZ1
CITRE_006g007540	1.24011368477427	1.80560332018768e-14	conserved hypothetical protein
CITRE_001g024310	0.75245448948155	1.81835015825993e-14	CASP-like protein
CITRE_003g053480	1.51311873306821	2.13915541142083e-14	conserved hypothetical protein
CITRE_008g030480	1.14694091548015	2.20075028294042e-14	Tropinone reductase%2C chloroplastic
CITRE_006g021010	0.732092774222037	2.22254603580294e-14	conserved hypothetical protein
CITRE_001g007510	-0.439554734891949	2.45098056001384e-14	NADH-cytochrome b5 reductase
CITRE_001g030760	0.942825520901079	2.5377282081509e-14	MFS domain-containing protein
CITRE_005g011610	-0.605682170422897	2.76254152083206e-14	conserved hypothetical protein
CITRE_009g002050	1.17825439415258	3.01924628053164e-14	putative Transcription factor MYB111
CITRE_008g027810	-0.367828374385767	3.17422646023435e-14	Elongation factor 1-alpha
CITRE_004g002070	1.15072129490698	3.30197584057554e-14	Protein-serine/threonine phosphatase
CITRE_003g010550	0.64265042434906	3.43463188938756e-14	Deoxyribodipyrimidine photo-lyase
CITRE_008g004440	0.501942653572482	3.69540225288122e-14	C2H2-type domain-containing protein
CITRE_001g004110	0.530630138365043	3.96658663042508e-14	conserved hypothetical protein
CITRE_004g000870	-0.744550653042661	3.96658663042508e-14	ATPase_AAA_core domain-containing protein
CITRE_004g013310	0.593248173978598	4.3646822120724e-14	putative Zinc finger CCCH domain-containing protein 12
CITRE_002g009470	0.445794113469738	4.78775361199603e-14	Ras-related protein RABB1b
CITRE_002g034750	0.379662838893522	4.83424981613658e-14	ABC1 domain-containing protein
CITRE_004g028190	-0.335287081097013	5.15879547492381e-14	Trihelix transcription factor GT-1
CITRE_009g031070	0.447848041841492	5.20278225716437e-14	RNA polymerase sigma factor sigE%2C chloroplastic/mitochondrial
CITRE_008g027580	0.302805843525945	5.23398837007931e-14	C2H2-type domain-containing protein
CITRE_006g007200	0.390581037856932	5.25267618220754e-14	Ubiquitin-NEDD8-like protein RUB1
CITRE_002g034260	-0.492591906277831	5.28182360326881e-14	Thioredoxin domain-containing protein
CITRE_005g023710	0.957015836777063	5.42987437505004e-14	putative Non-functional pseudokinase ZRK2
CITRE_004g035170	0.603025898466863	5.44333632761979e-14	1%2C3-beta-glucan synthase
CITRE_008g032900	-0.609417979407978	5.47337084935146e-14	conserved hypothetical protein
CITRE_006g025580	-0.430963722073455	5.6107826042774e-14	MFS domain-containing protein
CITRE_004g031320	0.632647985611252	6.17116139189415e-14	AMP deaminase
CITRE_001g029950	0.316273691763024	6.27983086800857e-14	Protein-serine/threonine phosphatase
CITRE_009g000280	1.17376096123215	6.8016012652786e-14	conserved hypothetical protein
CITRE_006g025620	-0.85465351987569	7.06054969722044e-14	conserved hypothetical protein
CITRE_007g013930	-0.555131414763294	7.22129478903801e-14	CAAD domain-containing protein
CITRE_003g061670	-0.556366040627874	8.25265601441737e-14	conserved hypothetical protein
CITRE_004g023710	-0.979886552254405	8.55344526423511e-14	putative Thioredoxin-like protein YLS8
CITRE_007g001570	-0.82521374422659	8.92186400721865e-14	RING-type domain-containing protein
CITRE_007g025000	0.656567716760891	8.95148551381132e-14	Non-specific serine/threonine protein kinase
CITRE_005g038280	0.573716947742693	9.09923167679232e-14	TLDc domain-containing protein
CITRE_007g000420	0.372906309745474	1.00197385490821e-13	Homeobox domain-containing protein
CITRE_003g048540	-0.433108665870763	1.06040668808928e-13	CLIP-associated protein
CITRE_001g003210	0.592658661021592	1.15995073421709e-13	putative Transcription factor HY5
CITRE_002g007930	0.800655985686592	1.23171919397631e-13	Phosphoglucan phosphatase LSF1%2C chloroplastic
CITRE_009g000370	0.436046361633998	1.23171919397631e-13	Protein-serine/threonine kinase
CITRE_003g058160	0.60066423435039	1.32679478096886e-13	conserved hypothetical protein
CITRE_001g007000	0.817321508287211	1.41044209769975e-13	EIN3-binding F-box protein 2
CITRE_003g059580	0.723480808125857	1.53590991229502e-13	conserved hypothetical protein
CITRE_001g035420	-1.08681017470277	1.62909668335643e-13	conserved hypothetical protein
CITRE_004g034940	0.736999888567284	1.73704343252449e-13	TP_methylase domain-containing protein
CITRE_009g032340	0.476350985903647	1.81209042822651e-13	putative Defective in cullin neddylation protein
CITRE_003g000440	0.666709140085281	1.88151035203531e-13	Glucan endo-1%2C3-beta-D-glucosidase
CITRE_002g033990	-0.370323341852465	1.93704000611741e-13	putative pyruvate%2C phosphate dikinase regulatory protein%2C chloroplastic
CITRE_003g008710	0.6911247839889	2.06487975986185e-13	Hypothetical protein
CITRE_011g000050	0.52849875947198	2.1674345562447e-13	putative disease resistance protein RGA3
CITRE_005g027290	0.414805330901711	2.17659077809805e-13	Non-specific serine/threonine protein kinase
CITRE_007g006460	-0.854541655453042	2.22776188764565e-13	LOB domain-containing protein
CITRE_007g018630	-0.977427050743714	2.25819095207719e-13	CobW C-terminal domain-containing protein
CITRE_005g028010	-0.591349608918563	2.31040293090273e-13	Glucose-6-phosphate isomerase
CITRE_005g038110	0.451449504236073	2.32612198093836e-13	AB hydrolase-1 domain-containing protein
CITRE_004g031010	-1.09259822709315	2.40427490027766e-13	Hypothetical protein
CITRE_002g029330	-0.537343630207855	2.41855320676583e-13	Beta-glucosidase
CITRE_006g014510	0.529862417403078	2.48675280779064e-13	conserved hypothetical protein
CITRE_001g014580	0.729347434032155	2.64263428347419e-13	Protein-serine/threonine phosphatase
CITRE_004g009600	-0.539979686487081	2.65811098991666e-13	Glyco_transf_64 domain-containing protein
CITRE_006g010910	-0.411217931881773	2.70325226381868e-13	NAD(P)-bd_dom domain-containing protein
CITRE_003g014590	-0.781545905399815	2.71251667577776e-13	Ribonucloprotein
CITRE_001g035360	0.562517485187889	2.8702330850329e-13	putative Homeobox protein knotted-1-like LET12
CITRE_003g054350	0.643115486903584	2.89458301037198e-13	conserved hypothetical protein
CITRE_003g058500	0.702787845761472	3.10293318467623e-13	Mitochondrial carrier protein MTM1
CITRE_001g031750	0.759721089788443	3.12449853442802e-13	CMP/dCMP-type deaminase domain-containing protein
CITRE_004g006650	-0.755075653980623	3.15849303305308e-13	DUF4005 domain-containing protein
CITRE_002g035740	-1.10115331849845	3.16064313913909e-13	Pentatricopeptide repeat-containing protein At4g21705%2C mitochondrial
CITRE_007g032870	0.895476663893223	3.25030342227855e-13	Inositol-3-phosphate synthase
CITRE_008g027480	0.672416498428818	3.27756540598732e-13	putative pyridoxal 5'-phosphate synthase subunit PDX2
CITRE_009g028080	1.47445739488069	3.47323814602178e-13	Protein-serine/threonine phosphatase
CITRE_005g029080	-0.636000188080517	3.71350106993837e-13	Methyltransf_11 domain-containing protein
CITRE_003g004110	0.427182196163664	3.72468064773044e-13	Calcium-dependent protein kinase 10
CITRE_007g019620	0.86470632618707	3.80365538492757e-13	conserved hypothetical protein
CITRE_005g006130	-0.81532541365633	4.00126228843039e-13	Chlorophyll a-b binding protein%2C chloroplastic
CITRE_007g033360	-0.635434548727284	4.09765557842185e-13	conserved hypothetical protein
CITRE_002g027360	0.616007711082897	4.25028471508511e-13	Multicopper oxidase LPR1
CITRE_003g026910	0.544390679922335	4.34866913109322e-13	conserved hypothetical protein
CITRE_008g009240	0.768006518865458	4.34912852915373e-13	AAA domain-containing protein
CITRE_003g010480	0.708118110249232	4.3933739692316e-13	putative transferase At4g12130%2C mitochondrial
CITRE_006g004970	0.83740150580903	4.47492793148797e-13	Methyltransf_2 domain-containing protein
CITRE_008g018300	0.801624773450483	4.5226991888933e-13	putative Transcription factor bHLH111
CITRE_006g008850	-1.04819443870841	4.90127028431977e-13	Two-component response regulator-like APRR7
CITRE_007g024140	-0.625467234726681	5.04521197768142e-13	conserved hypothetical protein
CITRE_002g025850	0.433041314593707	5.16925327915388e-13	Protein kinase domain-containing protein
CITRE_003g057360	0.967063197910879	5.72814896179608e-13	BHLH domain-containing protein
CITRE_002g010690	0.886151363529799	6.48856145816211e-13	conserved hypothetical protein
CITRE_007g010090	0.288866066118886	6.5896267834145e-13	Serine/threonine protein phosphatase 2A 55 kDa regulatory subunit B beta isoform
CITRE_004g030910	0.857511503271665	6.68943022722916e-13	Hexosyltransferase
CITRE_006g029910	0.468099920779634	6.87075275882275e-13	Myb-like domain-containing protein
CITRE_001g002860	0.72317972402545	6.96383070317136e-13	conserved hypothetical protein
CITRE_002g007950	0.418559362796881	6.98945030360214e-13	Phospholipid-transporting ATPase
CITRE_004g032710	0.90952987901354	6.98945030360214e-13	putative WRKY transcription factor 4
CITRE_003g012690	-0.912906789523438	7.22300731852867e-13	conserved hypothetical protein
CITRE_003g047580	0.445197805365374	7.34137712576627e-13	Cyclin-C1-2
CITRE_008g006540	-0.800142177932325	8.38299417999573e-13	conserved hypothetical protein
CITRE_005g012780	1.19648948136777	8.72679844005993e-13	Cytochrome P450 98A2
CITRE_005g005330	-0.377084456517595	9.54825960091317e-13	Castor_Poll_mid domain-containing protein
CITRE_004g025440	0.96750909633329	1.01666230571544e-12	conserved hypothetical protein
CITRE_005g026170	0.971631912925833	1.03901410863126e-12	Zinc finger protein ZAT10
CITRE_004g031900	-0.468965778220229	1.13460927099075e-12	putative PH%2C RCC1 and FYVE domains-containing protein 1
CITRE_008g023840	-0.819661108034201	1.17825530013257e-12	AB hydrolase-1 domain-containing protein
CITRE_008g030050	-0.419094188450986	1.17938805761411e-12	Telomere repeat-binding protein 5
CITRE_007g001560	-0.848288027345643	1.20136675724675e-12	conserved hypothetical protein
CITRE_005g032350	-0.941188061320534	1.28581137763736e-12	Protein kinase domain-containing protein
CITRE_002g025480	-0.420126526374576	1.34505986642673e-12	Protein BASIC PENTACYSTEINE2
CITRE_002g001310	1.06261150187069	1.42502624783841e-12	conserved hypothetical protein
CITRE_008g029030	-1.84337813499373	1.53129035585836e-12	conserved hypothetical protein
CITRE_008g015760	-0.458182732737614	1.54645321990309e-12	Transglut_core2 domain-containing protein
CITRE_006g019400	0.570722197532996	1.66887953347725e-12	Sucrose-phosphatase
CITRE_001g011670	0.831909483490235	1.6720055932116e-12	Pentatricopeptide repeat-containing protein At1g62260%2C mitochondrial
CITRE_003g012200	-1.11083641515172	1.6881617656473e-12	Chlorophyll a-b binding protein%2C chloroplastic
CITRE_002g022790	0.724721434272868	1.83200304967258e-12	AMP-binding domain-containing protein
CITRE_005g029840	0.454940409849085	1.98472861503752e-12	conserved hypothetical protein
CITRE_007g002250	-0.674366131510639	1.99986707232336e-12	H15 domain-containing protein
CITRE_003g014980	-0.847146505457589	2.00122070346847e-12	conserved hypothetical protein
CITRE_006g025050	-0.464321126975917	2.04274988378542e-12	conserved hypothetical protein
CITRE_002g011660	0.390187357621536	2.06709875452975e-12	putative magnesium transporter NIPA8
CITRE_004g003810	-0.925422695639025	2.07997757906089e-12	DEAD-box ATP-dependent RNA helicase 17
CITRE_008g000040	0.439523089279596	2.12278629149625e-12	Phototropin-2
CITRE_004g020860	1.01319567322845	2.12813964425116e-12	TF-B3 domain-containing protein
CITRE_008g031030	-2.55944710791467	2.30629481735188e-12	SHSP domain-containing protein
CITRE_002g014610	-0.439655590095643	2.31351040907198e-12	UBX domain-containing protein
CITRE_005g015310	0.460704207464446	2.32641675979625e-12	TFIIS N-terminal domain-containing protein
CITRE_003g009570	-0.823352039408749	2.40063312667553e-12	conserved hypothetical protein
CITRE_003g016550	0.421282450451308	2.52549537808032e-12	conserved hypothetical protein
CITRE_009g010110	-0.292802704417706	2.55821765928806e-12	ATP synthase subunit beta
CITRE_001g032610	0.679720913658545	2.7203060749072e-12	4-coumarate--CoA ligase CCL1
CITRE_001g034920	0.430400835172336	2.7203060749072e-12	Temperature-induced lipocalin
CITRE_003g009890	-0.367830067144172	2.7203060749072e-12	putative NADH dehydrogenase [ubiquinone] 1 beta subcomplex subunit 8%2C mitochondrial
CITRE_007g009440	0.882054152247148	2.7203060749072e-12	Hypothetical protein
CITRE_004g006730	-0.568967687385937	2.82320417884141e-12	Transcription factor GTE1
CITRE_009g008270	-0.516338720143656	2.97881157084223e-12	CRM-domain containing factor CFM3A%2C chloroplastic/mitochondrial
CITRE_008g026520	0.370465292367045	3.09769062580637e-12	Dolichol kinase
CITRE_008g028570	-0.503993156019732	3.13258702483333e-12	Phototropin-1
CITRE_001g016230	0.879870270057002	3.13953405738031e-12	Aminotran_1_2 domain-containing protein
CITRE_005g025170	-0.820326333603895	3.18703460272624e-12	Nicotianamine synthase
CITRE_002g004540	0.632501714335893	3.19711015220552e-12	putative NAD(H) kinase 1
CITRE_008g001950	1.29876447269985	3.24985662850237e-12	Hypothetical protein
CITRE_009g003400	0.417707351332583	3.7168737280517e-12	putative histone-arginine methyltransferase 1.4
CITRE_004g027180	0.911786766241057	3.7450283687593e-12	conserved hypothetical protein
CITRE_268g000020	1.28988691176094	3.76674251637922e-12	BHLH domain-containing protein
CITRE_006g030220	0.65307599177643	3.79315222863294e-12	TCP domain-containing protein
CITRE_003g034110	0.535484082594041	3.87061779026927e-12	putative DUF2062 domain-containing protein
CITRE_009g029500	-0.259138528045742	4.00265173671076e-12	60S ribosomal protein L36
CITRE_004g031570	0.449553199858267	4.05183919834911e-12	DUF1664 domain-containing protein
CITRE_004g021110	0.446258215568509	4.16392631835601e-12	EF-hand domain-containing protein
CITRE_003g058620	0.613021780671009	4.3214498785867e-12	BTB domain-containing protein
CITRE_004g013040	-0.655423788661999	4.3214498785867e-12	NUFIP1 domain-containing protein
CITRE_009g031300	1.85086575655587	4.47368122294587e-12	Trehalose 6-phosphate phosphatase
CITRE_006g021700	0.898047176362271	4.53179866769369e-12	Phytosulfokine
CITRE_008g021970	0.486384643227535	4.87991078137397e-12	J domain-containing protein
CITRE_002g003090	1.16384019443559	4.99249510383006e-12	conserved hypothetical protein
CITRE_003g000310	0.684606965023233	5.05126549997806e-12	TF-B3 domain-containing protein
CITRE_003g041360	-0.507596026537315	5.30050943917965e-12	Protein GAMETE CELL DEFECTIVE 1%2C mitochondrial
CITRE_003g048280	-0.84600808799606	5.41463804843446e-12	conserved hypothetical protein
CITRE_002g039390	0.441059628644437	5.43417536436094e-12	conserved hypothetical protein
CITRE_004g000690	-0.503227828950205	5.50738544731937e-12	putative Ultraviolet-B receptor UVR8
CITRE_003g036200	0.911145825205068	5.62440547431707e-12	Glycosyltransferase
CITRE_001g018400	-1.14700029843975	5.75860746844501e-12	Chlorophyll a-b binding protein 13%2C chloroplastic
CITRE_003g025510	1.52711793771306	5.81639297578359e-12	putative Two-component response regulator-like APRR5
CITRE_008g011680	0.500630172351792	6.15470826148904e-12	DNA-directed RNA polymerase II subunit RPB2
CITRE_009g016960	0.635719851185374	6.15470826148904e-12	conserved hypothetical protein
CITRE_009g006380	0.897258015347736	6.39243054763011e-12	conserved hypothetical protein
CITRE_004g011660	-0.393087975261106	6.7770076280356e-12	ACT domain-containing protein ACR12
CITRE_009g028190	0.591322974187769	7.24762678967518e-12	putative Abhydrolase_3 domain-containing protein
CITRE_002g034070	0.760104043634582	7.31150567190820e-12	putative UDP-3-O-acylglucosamine N-acyltransferase 2%2C mitochondrial
CITRE_003g056400	-0.573076000253295	7.54292934991868e-12	PPM-type phosphatase domain-containing protein
CITRE_008g026490	0.774521534819103	7.61543313730076e-12	ABC transporter F family member 1
CITRE_009g012950	-1.65479185445181	7.63949944811684e-12	Chaperonin CPN60-2%2C mitochondrial
CITRE_040g000040	-0.408934712280029	7.69061262363155e-12	TIR domain-containing protein
CITRE_006g022130	7.18074036523843	7.89602003362452e-12	Late embryogenesis abundant protein ECP63
CITRE_008g010310	-0.651863277142393	8.04638401028912e-12	Fructose-bisphosphate aldolase
CITRE_002g026570	0.565157268577304	8.17205112843559e-12	Tify domain-containing protein
CITRE_008g024520	-0.394348701447681	8.74464204422006e-12	2-carboxy-D-arabinitol-1-phosphatase
CITRE_009g030290	1.17859936735459	9.24252546047508e-12	conserved hypothetical protein
CITRE_004g018040	-0.783128410906742	9.28214047171178e-12	PsbP domain-containing protein
CITRE_003g060800	0.53277063881148	9.40677786876786e-12	Protein kinase domain-containing protein
CITRE_003g009930	-0.851967093579547	9.44475902308675e-12	conserved hypothetical protein
CITRE_006g029260	0.532091195329493	9.82899524399613e-12	Dof-type domain-containing protein
CITRE_007g012230	-1.23683922097794	9.82899524399613e-12	J domain-containing protein
CITRE_005g020810	3.39488638384899	9.87051719937522e-12	conserved hypothetical protein
CITRE_004g026580	0.782170071906458	1.01708765589689e-11	putative Ureide permease 1
CITRE_005g016780	0.619426238603234	1.0383094641559e-11	Myb-like domain-containing protein
CITRE_001g020980	0.634998049172151	1.08682576764298e-11	Protein NDR1
CITRE_001g024690	-0.355494068590082	1.09216731870627e-11	1%2C4-alpha-glucan-branching enzyme 3%2C chloroplastic/amyloplastic
CITRE_001g030750	1.04496358055041	1.13895146163851e-11	conserved hypothetical protein
CITRE_039g000440	1.09847748030124	1.19684369389329e-11	conserved hypothetical protein
CITRE_002g040700	0.488338678120882	1.22610451834929e-11	F-box protein CPR1
CITRE_003g049560	0.536132507866013	1.23792714085751e-11	ABC transporter domain-containing protein
CITRE_005g038290	-0.590194326233584	1.23792714085751e-11	conserved hypothetical protein
CITRE_005g030040	-0.52037166274351	1.30919251413114e-11	Histone-lysine N-methyltransferase ASHR1
CITRE_001g016320	0.620992295864155	1.32633719816079e-11	conserved hypothetical protein
CITRE_006g009070	0.647390707246121	1.34360094578425e-11	RING-type domain-containing protein
CITRE_003g058750	-0.501158619537466	1.3646214386155e-11	conserved hypothetical protein
CITRE_004g026570	1.08746916066072	1.38078219101422e-11	conserved hypothetical protein
CITRE_007g016600	-0.378471278189477	1.39482686262309e-11	MPN domain-containing protein
CITRE_003g013480	-0.296604276147337	1.43868964445368e-11	ATP synthase subunit gamma
CITRE_005g028830	0.588166443761447	1.47753306125956e-11	putative 5'-adenylylsulfate reductase-like 4
CITRE_001g024130	-0.579629375396427	1.47916254396416e-11	putative PGG domain-containing protein
CITRE_003g000210	-0.29439601041636	1.47916254396416e-11	60S ribosomal protein L9
CITRE_005g036540	-0.330529250953992	1.48014706114802e-11	EGF-like domain-containing protein
CITRE_009g030250	1.13556267684631	1.50690336437469e-11	putative protein REVEILLE 6
CITRE_003g046990	-0.62814664567105	1.65133691837744e-11	5-methyltetrahydropteroyltriglutamate--homocysteine methyltransferase 1
CITRE_008g000520	-0.561784904598609	1.65855305229982e-11	conserved hypothetical protein
CITRE_005g032290	1.0122809897755	1.76395741318165e-11	Pathogen-related protein
CITRE_014g000950	0.440326488910537	1.76780100111265e-11	Chloride channel protein
CITRE_005g023450	0.522650412971005	1.82886798220183e-11	Long-chain-fatty-acid--CoA ligase
CITRE_008g018220	0.447310682968174	2.00138416847082e-11	PRA-CH domain-containing protein
CITRE_009g017170	0.610073991016857	2.10762925824655e-11	Glycosyltransferase
CITRE_001g004050	-0.39614696448533	2.14755115009006e-11	RING-type domain-containing protein
CITRE_004g021680	0.557066946490754	2.15107795690388e-11	Alcohol dehydrogenase 1
CITRE_002g007890	-0.495609206298661	2.23173203351852e-11	putative PDZ domain-containing protein
CITRE_002g040980	-0.466449444082795	2.2477546086937e-11	Transcriptional adapter
CITRE_008g023830	-1.7032443608358	2.3602489426362e-11	conserved hypothetical protein
CITRE_001g013200	-0.333414050818893	2.57890975918907e-11	Mitogen-activated protein kinase
CITRE_008g027380	-0.230925724751996	2.60887646875976e-11	Protein disulfide-isomerase
CITRE_003g018140	0.397576941872679	2.71732166999429e-11	Alpha-1%2C3/1%2C6-mannosyltransferase ALG2
CITRE_006g027250	0.556033842616957	2.72480414576208e-11	1-phosphatidylinositol 4-kinase
CITRE_001g011690	-0.625038791609492	2.73494128337293e-11	conserved hypothetical protein
CITRE_007g014750	0.365976731505885	2.88416054104694e-11	Myb_DNA-bind_4 domain-containing protein
CITRE_008g023820	-1.40688884292136	2.96307424094092e-11	hypothetical protein
CITRE_002g034770	1.21391374779281	2.968181389393e-11	Transcription factor MYB102
CITRE_004g027660	-1.68383031965668	3.00064774413301e-11	conserved hypothetical protein
CITRE_003g022250	0.368920894020486	3.13334858388325e-11	J domain-containing protein
CITRE_005g028040	-0.432983518285371	3.60658536952081e-11	14-3-3-like protein B
CITRE_008g004510	0.588385130268548	3.61360137112679e-11	Complex1_LYR_dom domain-containing protein
CITRE_003g048980	0.714530030478481	3.62727843845234e-11	Auxin-responsive protein
CITRE_005g036770	0.601626494881655	3.62727843845234e-11	putative serine/threonine protein kinase IRE4
CITRE_003g015360	0.866703658593251	3.89547547949056e-11	Abhydro_lipase domain-containing protein
CITRE_002g008680	1.62508159200081	3.96265047829574e-11	conserved hypothetical protein
CITRE_003g036730	0.782239961636782	3.97037905311153e-11	La-related protein 6B
CITRE_004g004340	0.799152339042773	3.99404850566717e-11	hypothetical protein
CITRE_002g030820	-0.62404012472711	4.22834000195242e-11	Protein NARROW LEAF 1
CITRE_004g021780	0.534671307693697	4.25879867767799e-11	PKS_ER domain-containing protein
CITRE_004g003180	-0.629368003270155	4.26419157020088e-11	Mini-chromosome maintenance complex-binding protein
CITRE_003g026480	-0.593216976520253	4.27317456750982e-11	UV-B-induced protein At3g17800%2C chloroplastic
CITRE_004g029810	0.799390289511123	4.37306340797432e-11	hypothetical protein
CITRE_008g005610	0.562429959432403	4.37306340797432e-11	TLC domain-containing protein
CITRE_008g013380	0.499226649532896	4.58623246349786e-11	Receptor-like serine/threonine-protein kinase
CITRE_009g011970	0.786849055206116	4.59704340994488e-11	Beta-amylase
CITRE_003g010090	-0.350233314931567	4.60516411237558e-11	Transaldolase
CITRE_008g001970	0.879880634841005	4.60517360394219e-11	BZIP domain-containing protein
CITRE_004g008780	0.390885204304409	4.83726639597238e-11	NAC domain-containing protein
CITRE_002g001030	0.9169848599393	5.13476329807244e-11	CP-type G domain-containing protein
CITRE_002g037660	-0.703389908172177	5.26872770909015e-11	Rho_N domain-containing protein
CITRE_005g026530	0.521638192119419	5.30479552415459e-11	Protein PHLOEM PROTEIN 2-LIKE A10
CITRE_002g036110	0.76557358644833	5.39506609752554e-11	LisH domain-containing protein
CITRE_007g008450	0.872629211506215	5.40184105953982e-11	Mitochondrial uncoupling protein 5
CITRE_006g016790	0.577188937755406	5.42479048232277e-11	J domain-containing protein
CITRE_007g000340	0.599607030402703	5.49547914787513e-11	Aa_trans domain-containing protein
CITRE_003g058870	0.416845176991472	5.62519134140039e-11	Reticulon-like protein
CITRE_003g050400	-0.476264445088435	5.67211003930184e-11	Magnesium transporter MRS2-I
CITRE_003g056310	1.98732606442817	5.77602363362739e-11	putative Cytochrome P450 709B1
CITRE_005g038270	0.505909753625217	5.86575862633494e-11	conserved hypothetical protein
CITRE_008g027210	0.406546348955152	5.92421140474554e-11	Vacuolar fusion protein MON1
CITRE_002g040440	0.460798955794831	6.16823160860156e-11	conserved hypothetical protein
CITRE_005g029440	0.865395153900193	6.23525712954692e-11	Peptidase A1 domain-containing protein
CITRE_008g025910	0.927590199749353	6.25813598492253e-11	Histone domain-containing protein
CITRE_003g007900	-0.500707318756314	6.28033301298508e-11	FLZ-type domain-containing protein
CITRE_004g006440	0.404344292662512	6.60738146737282e-11	conserved hypothetical protein
CITRE_004g034270	-0.425784153547473	6.63769302873915e-11	60S ribosomal protein L31
CITRE_006g019770	0.596917196446058	6.84774542132575e-11	Digalactosyldiacylglycerol synthase
CITRE_001g025140	0.994027220582974	6.86430313179672e-11	MBOAT_2 domain-containing protein
CITRE_001g006840	0.398885211479345	7.34562793793886e-11	Glucan endo-1%2C3-beta-D-glucosidase
CITRE_001g019940	-0.797801470095354	7.62096864150228e-11	Organelle RRM domain-containing protein 2%2C mitochondrial
CITRE_003g060720	0.384025041673996	7.6317831590908e-11	Histone deacetylase complex subunit SAP18
CITRE_005g027780	0.509736358725585	7.765466376135e-11	MADS-box protein JOINTLESS
CITRE_005g016760	0.480855659904491	7.89111133611151e-11	Phytochrome-interacting ankyrin-repeat protein 2
CITRE_006g016030	0.691327540338771	7.99964187305804e-11	Serine/threonine-protein kinase AtPK2/AtPK19
CITRE_004g006260	0.308376629027182	8.1166071223812e-11	Zinc finger CCCH domain-containing protein 11
CITRE_002g040930	0.555589081884137	8.13908092988753e-11	CASP-like protein
CITRE_003g006330	-0.453517889883505	8.13908092988753e-11	conserved hypothetical protein
CITRE_001g012080	-0.545486122294941	8.16032067563727e-11	Tetraspanin-2
CITRE_002g008630	0.580502950130287	8.16032067563727e-11	putative F-box/LRR-repeat protein 4
CITRE_004g025780	-1.5476290189328	8.97856846099851e-11	HATPase_c domain-containing protein
CITRE_008g007690	-0.792993898608458	9.24884900481547e-11	putative Transcription termination factor MTEF1%2C chloroplastic
CITRE_004g031270	0.738779713859735	9.37698748461713e-11	DYW_deaminase domain-containing protein
CITRE_007g009130	0.37895039566212	9.5168051432789e-11	AB hydrolase-1 domain-containing protein
CITRE_009g028470	0.903566409986561	9.68762045751472e-11	putative Pentatricopeptide repeat-containing protein At2g22410%2C mitochondrial
CITRE_002g032540	-0.750949358230271	9.87715784718071e-11	2-succinylbenzoate--CoA ligase%2C chloroplastic/peroxisomal
CITRE_001g028480	0.548434174965298	1.04846233325138e-10	Beta-ketoacyl-[acyl-carrier-protein] synthase I
CITRE_005g025390	1.49114031109305	1.18065298585389e-10	BHLH domain-containing protein
CITRE_001g032040	-0.478166434087962	1.19853253901114e-10	putative Mitochondrial outer membrane import complex protein METAXIN
CITRE_004g034300	0.268013825192848	1.19853253901114e-10	RRM domain-containing protein
CITRE_009g021590	-0.395020112082947	1.19853253901114e-10	Calcium-transporting ATPase 4%2C plasma membrane-type
CITRE_006g013850	0.496968332909132	1.20247071979609e-10	GDSL esterase/lipase CPRD49
CITRE_004g029750	-0.291109899910918	1.2138571954916e-10	Ubiquitin-40S ribosomal protein S27a
CITRE_004g028570	-0.640720059386198	1.23721428092005e-10	conserved hypothetical protein
CITRE_003g047670	0.551186959411561	1.26948474072573e-10	AP2/ERF domain-containing protein
CITRE_001g007540	0.489196525783389	1.27544695306255e-10	NAD(+) diphosphatase
CITRE_002g031770	0.388399179211221	1.27928617451362e-10	Alpha N-terminal protein methyltransferase 1
CITRE_008g027820	-0.422243120827919	1.27928617451362e-10	Elongation factor 1-alpha
CITRE_003g043680	-0.372642496026067	1.30717898464799e-10	putative Petal death protein
CITRE_004g005810	0.368908498458101	1.33372827472505e-10	Pectate lyase
CITRE_008g028890	0.314347861711157	1.33372827472505e-10	E3 UFM1-protein ligase 1
CITRE_002g028840	0.488531784411212	1.38609636457624e-10	conserved hypothetical protein
CITRE_008g003610	0.833615614599024	1.39315324439223e-10	putative 2-oxoglutarate-dependent dioxygenase 11
CITRE_004g001140	0.433472844173486	1.4020496184369e-10	Coronatine-insensitive protein 1
CITRE_008g005300	-0.449402363445091	1.40458559238049e-10	RING-type domain-containing protein
CITRE_004g032750	-0.535677104870074	1.40613450190615e-10	Cell division topological specificity factor%2C chloroplastic
CITRE_006g008080	-0.81002240994857	1.41030417162902e-10	conserved hypothetical protein
CITRE_001g000590	0.470118178382912	1.42483279547908e-10	conserved hypothetical protein
CITRE_004g023430	-0.698588732982924	1.46705961854275e-10	conserved hypothetical protein
CITRE_005g016530	-0.486109729023097	1.63102005593202e-10	Alpha%2Calpha-trehalose-phosphate synthase [UDP-forming] 5
CITRE_005g031380	0.754163578460724	1.65303282144368e-10	putative calcium-binding protein CML44
CITRE_004g006640	0.69571942828378	1.68881809123341e-10	CTP synthase
CITRE_006g021800	-0.583980763913742	1.73303898957796e-10	Enolase
CITRE_005g006250	-0.709439291218275	1.75634015060687e-10	NB-ARC domain-containing protein
CITRE_008g022720	-1.07946841493606	1.79736253003993e-10	Photosystem I subunit O
CITRE_007g006340	0.668039097791919	1.85449093272222e-10	Protein CONSERVED IN THE GREEN LINEAGE AND DIATOMS 27%2C chloroplastic
CITRE_002g034990	0.464991758685653	1.9477539173261e-10	B3 domain-containing protein Os07g0563300
CITRE_005g033940	0.401014311141007	1.95778806484187e-10	Uncharacterized membrane protein At4g09580
CITRE_177g000040	2.18279546809563	1.95778806484187e-10	30S ribosomal protein S16%2C chloroplastic
CITRE_007g032940	0.502871481646911	1.97762692292827e-10	FLZ-type domain-containing protein
CITRE_008g010080	-0.280427779506897	2.01451594317839e-10	Subtilisin-like protease SBT3.9
CITRE_005g008910	1.14582818581318	2.03495825418783e-10	Hypothetical protein
CITRE_002g008060	0.370068141817113	2.06968606996512e-10	ADP-ribosylation factor 1
CITRE_007g014200	0.779568570087702	2.06968606996512e-10	Kinesin-like protein
CITRE_002g031800	-0.642026412559202	2.08240161576213e-10	Toprim domain-containing protein
CITRE_002g004150	-0.509623911548416	2.09800031408093e-10	Nuf2 domain-containing protein
CITRE_003g005350	0.607522772772199	2.09800031408093e-10	putative inactive poly [ADP-ribose] polymerase SRO5
CITRE_008g028050	0.38802691203566	2.11792662885355e-10	AB hydrolase-1 domain-containing protein
CITRE_003g037470	0.516730868623277	2.120395504905e-10	2-alkenal reductase (NADP(+)-dependent)
CITRE_003g004750	0.444921461293771	2.12816656481435e-10	conserved hypothetical protein
CITRE_008g005390	-0.978723912522965	2.13471219299315e-10	Protein kinase domain-containing protein
CITRE_004g016600	0.366499497388013	2.31123637431222e-10	DUF4210 domain-containing protein
CITRE_004g032650	0.65723651189251	2.32766980766401e-10	conserved hypothetical protein
CITRE_004g034460	0.632579717558833	2.33256764548756e-10	conserved hypothetical protein
CITRE_002g015300	-0.69334557297641	2.36001841788282e-10	Aminotran_1_2 domain-containing protein
CITRE_003g045310	1.37978598021209	2.39102857388486e-10	RING-type E3 ubiquitin transferase
CITRE_002g024710	0.503149104161509	2.41117324915365e-10	Protein PEP-RELATED DEVELOPMENT ARRESTED 1%2C chloroplastic
CITRE_003g060500	-0.889618551438413	2.41393825758275e-10	conserved hypothetical protein
CITRE_004g029740	-0.873701245998759	2.43605826838621e-10	CRS2-associated factor 2%2C chloroplastic
CITRE_001g001880	0.424651220114947	2.62596932601283e-10	Aldedh domain-containing protein
CITRE_002g018930	0.836316899259127	2.64331559938704e-10	putative Pentatricopeptide repeat-containing protein At3g29230
CITRE_003g053700	0.720134982085578	2.66154242565586e-10	Beta-glucosidase 11
CITRE_003g043040	-0.237395851243911	2.70631638044445e-10	putative protein SEMI-ROLLED LEAF 2
CITRE_007g023660	0.504529947396139	2.7129804781992e-10	putative mitochondrial adenine nucleotide transporter BTL1
CITRE_006g020200	0.673262214265249	2.76537695345002e-10	conserved hypothetical protein
CITRE_005g005320	-0.721959056908761	2.91888243548303e-10	putative sodium/metabolite cotransporter BASS2%2C chloroplastic
CITRE_002g000020	-0.406951029598093	3.05036010932614e-10	Acetohydroxy-acid reductoisomerase
CITRE_003g061190	0.416122617976156	3.05289165435949e-10	Epimerase domain-containing protein
CITRE_001g016030	-1.03068081937381	3.07115480535188e-10	hypothetical protein
CITRE_003g001310	0.599907638262689	3.07115480535188e-10	Glutaredoxin domain-containing protein
CITRE_008g026310	0.540211898260981	3.07122634367814e-10	Alpha-L-fucosidase
CITRE_005g004040	-1.08504182070872	3.07607152290048e-10	putative disease resistance protein RGA3
CITRE_005g003280	-2.39216665799888	3.14009412986283e-10	conserved hypothetical protein
CITRE_005g040200	-0.59030554175974	3.14009412986283e-10	Glyceraldehyde-3-phosphate dehydrogenase
CITRE_003g002960	-0.600508511204927	3.21703862371504e-10	SAP30_Sin3_bdg domain-containing protein
CITRE_001g015020	0.725791152652363	3.21766963915148e-10	RNA helicase
CITRE_009g009100	-0.436874169912875	3.3052844992001e-10	conserved hypothetical protein
CITRE_007g005590	0.743342853949458	3.30852133882473e-10	conserved hypothetical protein
CITRE_004g015870	0.664095156033807	3.3191952355853e-10	conserved hypothetical protein
CITRE_009g030260	1.12394319977521	3.3191952355853e-10	putative protein REVEILLE 6
CITRE_003g060650	0.44692226880139	3.65629907944962e-10	Lysophospholipid acyltransferase LPEAT2
CITRE_004g021820	0.423990953507854	3.6724365562018e-10	conserved hypothetical protein
CITRE_005g029430	1.42064562397154	3.6724365562018e-10	HMA domain-containing protein
CITRE_002g033770	1.03020593790145	3.75322170091982e-10	Tryptophan synthase
CITRE_004g021270	0.56753534798618	3.76197210637574e-10	Ribonucleoside-diphosphate reductase large subunit
CITRE_002g011430	-0.368160144599771	3.8207405603363e-10	Acetate--CoA ligase
CITRE_006g019780	0.862211255911056	3.90919762154276e-10	LRAT domain-containing protein
CITRE_005g033000	-0.559927928993143	3.92094784634211e-10	5-formyltetrahydrofolate cyclo-ligase-like protein COG0212
CITRE_001g030240	0.320364231985032	4.08495913161235e-10	ENTH domain-containing protein
CITRE_003g050840	1.3711643358666	4.08684943825731e-10	DYW_deaminase domain-containing protein
CITRE_002g018980	-1.44641336453133	4.17857038120632e-10	Beta-amylase
CITRE_003g004710	-0.360763059658116	4.17857038120632e-10	Aldedh domain-containing protein
CITRE_001g020260	0.750363012281043	4.28540484553735e-10	Chitin-inducible gibberellin-responsive protein 1
CITRE_005g000580	0.511713283999222	4.37501270628979e-10	conserved hypothetical protein
CITRE_009g005860	0.429479242965024	4.37501270628979e-10	putative membrane-associated kinase regulator 1
CITRE_005g034730	-0.738732529226032	4.70686451570696e-10	F-box domain-containing protein
CITRE_007g031370	1.69124505691012	5.02401341126361e-10	conserved hypothetical protein
CITRE_007g017640	-0.47347862150923	5.03015629521101e-10	PTI1-like tyrosine-protein kinase At3g15890
CITRE_006g026380	0.641229278957562	5.11666147597204e-10	NAD(P)-bd_dom domain-containing protein
CITRE_003g055070	-0.471975213095952	5.13940744001671e-10	Peptidase_S9 domain-containing protein
CITRE_004g035210	0.445576419875394	5.13940744001671e-10	GTP 3'%2C8-cyclase
CITRE_003g055300	0.427806958178369	5.2031899548695e-10	Peptidyl-prolyl cis-trans isomerase
CITRE_003g053760	0.605541502849926	5.39875918680599e-10	conserved hypothetical protein
CITRE_008g032830	0.275254890277142	5.49594741547277e-10	YTH domain-containing protein
CITRE_007g020250	0.330098461498198	5.49900988304048e-10	putative Defective in cullin neddylation protein
CITRE_006g018760	-0.4031821056191	5.53024368866824e-10	60S ribosomal protein L21-2
CITRE_003g023770	0.85306242821046	5.60195746173257e-10	AB hydrolase-1 domain-containing protein
CITRE_005g033740	-0.577031293841123	5.73280834454409e-10	dNK domain-containing protein
CITRE_007g000440	0.974094860229909	5.79212861128521e-10	Lgl_C domain-containing protein
CITRE_032g000080	0.718348560754068	5.88141460883885e-10	conserved hypothetical protein
CITRE_003g007330	1.75773536308373	5.9635330351312e-10	conserved hypothetical protein
CITRE_005g034700	0.986965595113896	5.9635330351312e-10	WPP domain-containing protein
CITRE_006g008750	0.587921022379889	6.18491086472966e-10	Protein REVEILLE 8
CITRE_006g021250	0.6129524429094	6.27826299152852e-10	Zinc finger A20 and AN1 domain-containing stress-associated protein 6
CITRE_005g010460	0.524620115204407	6.54084614969955e-10	conserved hypothetical protein
CITRE_005g031340	0.500775684461715	6.81064615091344e-10	conserved hypothetical protein
CITRE_001g026770	-0.503964590414368	6.89739939433724e-10	GIP1_N domain-containing protein
CITRE_006g010080	-0.823435041347003	6.89894918589448e-10	Na_H_Exchanger domain-containing protein
CITRE_009g007200	-0.504793666421272	6.89894918589448e-10	1%2C2-dihydroxy-3-keto-5-methylthiopentene dioxygenase
CITRE_008g028500	-0.341243467262255	7.01273183474404e-10	PKS_ER domain-containing protein
CITRE_009g002040	0.4346900574159	7.05030005916623e-10	MPN domain-containing protein
CITRE_006g023560	0.579064013300318	7.08058505111313e-10	TFIIS N-terminal domain-containing protein
CITRE_005g005910	0.35218633687852	7.3810514483958e-10	putative magnesium transporter NIPA4
CITRE_001g000080	0.724682565446316	7.38914083442352e-10	conserved hypothetical protein
CITRE_004g031860	0.370731297210139	7.54982197421264e-10	F-box/kelch-repeat protein SKIP11
CITRE_007g015770	0.644639280194285	7.73581693218558e-10	putative protein kinase domain-containing protein
CITRE_002g009990	-0.341504950380303	7.83524310762582e-10	Protein kinase domain-containing protein
CITRE_002g025750	0.704595173621295	7.89240735188636e-10	GATase domain-containing protein
CITRE_002g023790	0.405750739070299	7.90952775809712e-10	putative Ribonuclease 1
CITRE_002g020530	0.24557623658425	8.08194067508592e-10	Small ubiquitin-related modifier
CITRE_002g005970	0.567845343627837	8.18595794956095e-10	RING-type domain-containing protein
CITRE_007g001630	-0.848581604718976	8.18595794956095e-10	Cold shock domain-containing protein 3
CITRE_007g004390	0.316087144643002	8.40101030683214e-10	conserved hypothetical protein
CITRE_008g007590	-0.618816561379495	8.42853407238392e-10	4-hydroxy-3-methylbut-2-enyl diphosphate reductase%2C chloroplastic
CITRE_002g007380	-0.601692367019172	8.58347341488424e-10	WAT1-related protein
CITRE_003g014190	-0.463365581121466	8.67098723476607e-10	Protein MICROTUBULE BINDING PROTEIN 2C
CITRE_005g030930	0.399471478616776	8.67098723476607e-10	DNA-(apurinic or apyrimidinic site) lyase
CITRE_002g026780	-0.631028301672556	8.7092132047082e-10	H15 domain-containing protein
CITRE_003g054170	-1.49751758297418	8.7092132047082e-10	RING-type domain-containing protein
CITRE_008g001670	1.26332550740085	8.7092132047082e-10	DYW_deaminase domain-containing protein
CITRE_003g015220	-1.02148150752401	8.72125554988485e-10	Transcription factor MYBS1
CITRE_007g018700	-0.38207664276795	8.75920801494915e-10	Protein TOPLESS
CITRE_004g000290	-0.49609499794856	8.94128387620238e-10	putative Transcription factor MYB1
CITRE_008g007860	0.424448035902122	8.99827182646394e-10	Mannitol transporter
CITRE_005g004180	-0.925095676539058	9.02877284218914e-10	Heat shock 70 kDa protein 6%2C chloroplastic
CITRE_005g027560	0.276001834531203	9.2978136856839e-10	GATA transcription factor 25
CITRE_005g037890	0.284799235906283	9.33935335548737e-10	conserved hypothetical protein
CITRE_005g033920	0.491870497746016	9.47918645556582e-10	Calcium-dependent protein kinase 11
CITRE_009g009900	-0.797668532713688	9.49769959296127e-10	dCTP pyrophosphatase 1
CITRE_009g026610	0.523447942003956	9.58577642999783e-10	conserved hypothetical protein
CITRE_009g001810	0.352277091513007	9.65482367758384e-10	SMK-1 domain-containing protein
CITRE_006g017930	1.15648916735878	9.68649365757832e-10	conserved hypothetical protein
CITRE_001g005320	-0.494164452014571	9.86782836420903e-10	Protein kinase domain-containing protein
CITRE_005g024590	1.13365897848045	9.86782836420903e-10	conserved hypothetical protein
CITRE_009g029300	0.446770669760276	1.01367303095946e-09	Oxalate--CoA ligase
CITRE_003g048860	0.534457884056328	1.02241610197454e-09	conserved hypothetical protein
CITRE_003g006320	0.590515636308679	1.06925696405886e-09	Non-specific serine/threonine protein kinase
CITRE_006g004470	0.669221868729329	1.07486183070317e-09	conserved hypothetical protein
CITRE_001g033030	-0.305940916321911	1.18461173944059e-09	DUF676 domain-containing protein
CITRE_005g040680	0.615250533120376	1.18461173944059e-09	BZIP domain-containing protein
CITRE_007g007190	-1.07806431482764	1.2048549752523e-09	Squalene monooxygenase
CITRE_001g027670	0.951832217410412	1.24008890984947e-09	putative calcium-binding protein CML21
CITRE_007g007590	0.829244202695033	1.2400940114047e-09	conserved hypothetical protein
CITRE_008g032200	0.563543450464984	1.25516611875788e-09	CBM20 domain-containing protein
CITRE_009g008310	0.612962510578628	1.27894291832725e-09	Zeta_toxin domain-containing protein
CITRE_005g039270	-0.381162919569112	1.37863671898428e-09	Thioredoxin domain-containing protein
CITRE_003g041110	-0.636825579822122	1.40773800893227e-09	Bms1-type G domain-containing protein
CITRE_002g003220	0.427849204514612	1.47030325582331e-09	conserved hypothetical protein
CITRE_002g018220	-0.473627105368939	1.50270322302534e-09	putative Chaperonin CPN60%2C mitochondrial
CITRE_006g026000	-0.432824049342615	1.52017723240874e-09	Rhomboid domain-containing protein
CITRE_007g021090	1.09950542335504	1.55976911570431e-09	conserved hypothetical protein
CITRE_002g018550	-0.445307308960615	1.59737164625081e-09	putative Chaperonin CPN60-2%2C mitochondrial
CITRE_001g016360	0.54180979540081	1.64936085091663e-09	conserved hypothetical protein
CITRE_001g016290	0.679818679916334	1.69884322228905e-09	putative pentatricopeptide repeat-containing protein At3g15200
CITRE_004g000980	0.418865963488124	1.71662369609131e-09	RING-type E3 ubiquitin transferase
CITRE_001g028150	-0.42299049131825	1.72125887606081e-09	Str_synth domain-containing protein
CITRE_002g010070	-0.541274732414548	1.72533661948594e-09	Prohibitin
CITRE_005g029370	0.581196422309363	1.78548203267403e-09	Acetyl-CoA carboxylase
CITRE_049g000860	3.26960980991241	1.88607204499745e-09	conserved hypothetical protein
CITRE_009g011130	-0.53708822926627	1.90239119295917e-09	Mitochondrial import receptor subunit TOM9-2
CITRE_009g006000	-1.26445565907391	1.92038378498072e-09	Lipoxygenase
CITRE_005g017630	-0.966934392381162	1.92997396002724e-09	conserved hypothetical protein
CITRE_001g010110	-0.5910095082951	1.95487566761254e-09	conserved hypothetical protein
CITRE_005g007450	-0.467635421387925	1.95676972761303e-09	Thiamine phosphate synthase
CITRE_008g023460	0.665158034303186	1.96273437662417e-09	conserved hypothetical protein
CITRE_003g061150	-0.550144096970064	1.99006344555164e-09	Ku domain-containing protein
CITRE_003g009200	0.271697097500809	2.00112436655738e-09	Altered inheritance of mitochondria protein 24%2C mitochondrial
CITRE_003g052550	1.21819097225192	2.02463869144848e-09	Abhydrolase_3 domain-containing protein
CITRE_009g014340	0.203608190579114	2.02463869144848e-09	RING-type domain-containing protein
CITRE_001g028280	0.530506826469042	2.03314103600426e-09	putative Ubiquinone biosynthesis protein
CITRE_002g022780	-0.649625492697646	2.12516481307379e-09	PLDc_N domain-containing protein
CITRE_003g003900	1.06441763435278	2.19856936774853e-09	conserved hypothetical protein
CITRE_003g001370	-0.302218963059296	2.2100572668446e-09	AAA domain-containing protein
CITRE_003g003870	-0.571220811237287	2.21669399826834e-09	conserved hypothetical protein
CITRE_007g004350	-0.622567122669523	2.23328976280888e-09	Oxygen-evolving enhancer protein 1%2C chloroplastic
CITRE_005g013370	-0.365916731392187	2.27058634632568e-09	conserved hypothetical protein
CITRE_007g023040	-0.619264444945134	2.27058634632568e-09	putative pentatricopeptide repeat-containing protein At1g16830
CITRE_008g023160	0.362645682543279	2.30105620763118e-09	UBA domain-containing protein
CITRE_002g008670	1.80477870574692	2.30126866192566e-09	conserved hypothetical protein
CITRE_003g055820	0.716996584490135	2.32778572544848e-09	Protein-serine/threonine phosphatase
CITRE_005g000610	0.588230903925492	2.34259435676197e-09	conserved hypothetical protein
CITRE_004g033320	0.850974207177739	2.39188190606057e-09	DYW_deaminase domain-containing protein
CITRE_006g013110	0.454670320151073	2.40897289875513e-09	Transcription factor DIVARICATA
CITRE_003g009120	0.455435653020505	2.42680447030188e-09	Acyl-coenzyme A oxidase
CITRE_006g008990	-0.403568779464369	2.4286587477829e-09	Glutathione S-transferase L3
CITRE_009g007520	-0.407084070196199	2.4365712853361e-09	conserved hypothetical protein
CITRE_009g028410	-0.563907403554498	2.48373816642205e-09	conserved hypothetical protein
CITRE_002g034450	-0.759204263220713	2.49133446528332e-09	conserved hypothetical protein
CITRE_006g025780	-0.67362533024887	2.52010898834822e-09	Ribulose bisphosphate carboxylase small subunit
CITRE_009g006510	0.404748354679248	2.52543644039375e-09	conserved hypothetical protein
CITRE_003g000290	0.928711133285268	2.59060494172421e-09	conserved hypothetical protein
CITRE_006g026520	0.470571775942031	2.76653066219619e-09	putative F-box/FBD/LRR-repeat protein At1g13570
CITRE_003g001450	-0.527566098799338	2.81676075992461e-09	Dynamin-related protein 5A
CITRE_008g021780	0.445826173482303	2.87632839166154e-09	Str_synth domain-containing protein
CITRE_004g005870	-0.310796445289708	2.99874301727079e-09	conserved hypothetical protein
CITRE_003g056250	-0.425772998797123	3.0418864363951e-09	Protoporphyrinogen oxidase
CITRE_006g028590	-0.2492394404098	3.14465134206208e-09	V-type proton ATPase subunit d2
CITRE_002g027140	-0.347330792030733	3.17771373036662e-09	Mitogen-activated protein kinase
CITRE_003g025480	0.668337563890043	3.21788439651902e-09	conserved hypothetical protein
CITRE_005g013450	0.359383558565526	3.24865676614612e-09	Histone-lysine N-methyltransferase%2C H3 lysine-9 specific SUVH1
CITRE_009g012110	0.597646447237179	3.25110952607353e-09	conserved hypothetical protein
CITRE_008g025920	0.659266841097903	3.29458205873212e-09	RING-type domain-containing protein
CITRE_001g010270	-1.55070305719428	3.30149546756193e-09	conserved hypothetical protein
CITRE_003g048880	-0.465230018229385	3.3729168109729e-09	Tyrosine decarboxylase 2
CITRE_001g024500	0.616350115737831	3.42108738740086e-09	conserved hypothetical protein
CITRE_005g019810	0.558724281742071	3.43501022192055e-09	conserved hypothetical protein
CITRE_099g000010	0.657739142598368	3.46625788644603e-09	VOC domain-containing protein
CITRE_004g020250	1.09331385135138	3.49803943731311e-09	putative protein DETOXIFICATION 22
CITRE_005g029590	1.07425132588855	3.5467166624875e-09	Pentatricopeptide repeat-containing protein At4g18520%2C chloroplastic
CITRE_004g008520	-0.625053849557571	3.60132566927504e-09	ACT domain-containing protein
CITRE_009g001140	-0.31547123909491	3.65615649272748e-09	conserved hypothetical protein
CITRE_005g027980	-0.531295086651456	3.71350184909181e-09	Rho GTPase-activating protein REN1
CITRE_007g029170	-0.405097323734049	3.7171174045275e-09	CPSase_sm_chain domain-containing protein
CITRE_005g018340	0.606661582011587	3.8118276650527e-09	conserved hypothetical protein
CITRE_001g005590	6.27181829013387	3.96989912855876e-09	Oleosin
CITRE_002g037290	0.802350263774711	3.97209681386593e-09	BHLH domain-containing protein
CITRE_007g026230	1.18436241734492	3.99785769239672e-09	putative Amino-acid permease BAT1
CITRE_006g014780	-1.04175417235483	4.00297953920135e-09	putative Abscisic acid receptor PYL4
CITRE_003g053710	0.530971591324052	4.15547048000265e-09	Phytochrome A-associated F-box protein
CITRE_004g032180	0.87125792113363	4.19791947212217e-09	RING-type domain-containing protein
CITRE_002g040410	-0.592778773604949	4.28780361726467e-09	putative Uncharacterized membrane protein At1g16860
CITRE_004g033730	0.475750825223748	4.34146195861338e-09	conserved hypothetical protein
CITRE_001g023310	0.83052219979738	4.4671839007369e-09	Lipid_desat domain-containing protein
CITRE_002g000950	-0.471558135698053	4.48593594383404e-09	conserved hypothetical protein
CITRE_009g024140	-0.334141213903083	4.61875329057873e-09	1-acylglycerol-3-phosphate O-acyltransferase
CITRE_002g035720	-0.519069239096435	4.62499427559871e-09	DUF1771 domain-containing protein
CITRE_007g025920	0.393048595281423	4.65929571460058e-09	conserved hypothetical protein
CITRE_002g031680	1.23192241737045	4.77507305379487e-09	putative protein CHUP1%2C chloroplastic
CITRE_005g025370	-0.459881916302329	4.8001742367605e-09	putative protein SUPPRESSOR OF QUENCHING 1%2C chloroplastic
CITRE_008g010320	0.392034779741082	4.82886683433983e-09	B-box zinc finger protein 19
CITRE_004g031590	-0.441475941356638	4.8336186668253e-09	Single-stranded DNA-binding protein WHY1%2C chloroplastic
CITRE_005g016720	0.410977419534834	4.92367129704489e-09	G-patch domain-containing protein
CITRE_002g005510	0.337165011201229	4.95395535493922e-09	putative magnesium transporter
CITRE_007g033730	0.388876951143508	5.01649748765767e-09	Protein kinase domain-containing protein
CITRE_001g029450	-0.794058020028996	5.25313833609129e-09	Cytokinin dehydrogenase
CITRE_003g002640	1.97771291746012	5.30577574152278e-09	HMA domain-containing protein
CITRE_005g036980	0.66272592646529	5.30577574152278e-09	conserved hypothetical protein
CITRE_002g026290	0.433300042225024	5.34946438229794e-09	E3 ubiquitin protein ligase RIE1
CITRE_008g030950	0.587870306113567	5.43147282355482e-09	conserved hypothetical protein
CITRE_002g031220	-0.44727059960249	5.45735147238579e-09	Hexosyltransferase
CITRE_008g025380	0.781332310395459	5.65562870336504e-09	Magnesium transporter
CITRE_009g001850	0.551162054097333	5.70692804357605e-09	GTP-binding protein SAR1A
CITRE_007g026510	0.48144899658845	5.76116203676199e-09	Pentatricopeptide repeat-containing protein At2g13420%2C mitochondrial
CITRE_004g028750	-0.334033768305926	5.83022834147853e-09	D-cysteine desulfhydrase 2%2C mitochondrial
CITRE_002g036370	0.894489312658721	5.86202428783492e-09	DYW_deaminase domain-containing protein
CITRE_003g005560	0.414501599582304	5.89849612578896e-09	Glutaredoxin domain-containing protein
CITRE_005g024690	0.79534530105824	5.92650679716169e-09	conserved hypothetical protein
CITRE_029g000490	-0.464594079504945	5.99289447651346e-09	Bax inhibitor 1
CITRE_001g033710	-1.1770113982232	6.07172745495138e-09	FAR1 domain-containing protein
CITRE_003g008940	0.596412679180516	6.38175819355739e-09	Nudix hydrolase domain-containing protein
CITRE_006g011240	-2.10513106735193	6.40426185953408e-09	ATPase_AAA_core domain-containing protein
CITRE_001g024930	-0.400348306525825	6.41632845731726e-09	putative EH domain-containing protein 1
CITRE_001g002930	-0.231721427907904	6.42578503861808e-09	DEAD-box ATP-dependent RNA helicase 15
CITRE_005g040300	-0.316668750470719	6.43952507106013e-09	Protein MULTIPLE CHLOROPLAST DIVISION SITE 1
CITRE_088g000050	-0.755026425628116	6.61847744039914e-09	Hypothetical protein
CITRE_002g010060	-0.370148911559998	6.68182087504755e-09	putative protein ECERIFERUM 16
CITRE_009g001590	0.33025281917922	6.70934929680258e-09	putative Peptidyl-prolyl cis-trans isomerase CYP21-4
CITRE_002g027840	-0.419202605661637	6.77831069925298e-09	RING-type domain-containing protein
CITRE_008g032140	1.38034698592135	6.85577076703787e-09	Protein kinase domain-containing protein
CITRE_009g027580	-0.358901745602347	6.86059838446212e-09	40S ribosomal protein S13
CITRE_003g056360	0.819037677643934	7.08941461315118e-09	Protein ABC transporter 1%2C mitochondrial
CITRE_002g037360	0.478514072050554	7.11137764927161e-09	14_3_3 domain-containing protein
CITRE_004g001680	-0.569802548007722	7.22917017991291e-09	conserved hypothetical protein
CITRE_008g003620	0.817292396579087	7.43426685982961e-09	conserved hypothetical protein
CITRE_004g000260	0.740367659039463	7.70889180267748e-09	Aa_trans domain-containing protein
CITRE_006g012200	0.631731040547513	8.01690984550743e-09	Protein NRT1/ PTR FAMILY 5.7
CITRE_006g007580	1.32186923226019	8.03830860007477e-09	Aquaporin PIP2-2
CITRE_007g010370	0.692005473484289	8.0581865678443e-09	Hypothetical protein
CITRE_003g013670	-0.468420724178167	8.14474830142495e-09	conserved hypothetical protein
CITRE_006g018480	0.241486925780046	8.20820711927594e-09	RING-type E3 ubiquitin transferase
CITRE_002g006530	0.527826326685365	8.24494445548912e-09	Fe2OG dioxygenase domain-containing protein
CITRE_003g059210	0.460614497970157	8.56206279921162e-09	Malectin_like domain-containing protein
CITRE_004g003140	0.752215589488664	8.56206279921162e-09	Phosphoglucan phosphatase LSF2%2C chloroplastic
CITRE_004g025450	0.518604693859271	9.15607586430335e-09	S-adenosylmethionine decarboxylase proenzyme
CITRE_002g027420	0.581515002121321	9.3078971718738e-09	Pentatricopeptide repeat-containing protein At1g71060%2C mitochondrial
CITRE_002g038710	-1.53474290211394	9.3078971718738e-09	Chlorophyll a-b binding protein 3C%2C chloroplastic
CITRE_005g024840	0.353613619259737	9.3078971718738e-09	Importin subunit alpha
CITRE_008g028290	0.615187897632021	9.3078971718738e-09	Mitogen-activated protein kinase
CITRE_008g031220	-0.774018454027684	9.7491151181383e-09	Tubulin beta-2 chain
CITRE_003g004120	0.568970223582025	9.75208731644896e-09	Smr domain-containing protein
CITRE_009g014430	-0.487442314423823	1.03260658331683e-08	DNA-directed RNA polymerase V subunit 7
CITRE_006g023770	-0.713662439549994	1.05851224488375e-08	Pentatricopeptide repeat-containing protein At1g80270%2C mitochondrial
CITRE_001g002700	0.330850158927797	1.06799873232484e-08	TPT domain-containing protein
CITRE_003g049960	-0.658102160392507	1.07745888910829e-08	conserved hypothetical protein
CITRE_003g042920	-0.435447998324422	1.09461090833701e-08	putative RRM domain-containing protein
CITRE_001g006200	0.353604184057954	1.11073681184775e-08	conserved hypothetical protein
CITRE_004g017430	-0.548896078996583	1.11598294472258e-08	putative FHA domain-containing protein
CITRE_001g022410	0.827822712691783	1.13172931037889e-08	Lipid_desat domain-containing protein
CITRE_008g002080	-0.924655027305756	1.13577826471158e-08	MYB-like transcription factor 4
CITRE_007g001200	-0.625931955531161	1.14626795742526e-08	conserved hypothetical protein
CITRE_001g027560	-1.00244445103036	1.1697053066208e-08	putative Aa_trans domain-containing protein
CITRE_002g020300	-1.37174482864253	1.1697053066208e-08	Cupin_3 domain-containing protein
CITRE_003g061630	-0.365577014999295	1.18505159887338e-08	Scarecrow-like protein 6
CITRE_004g028230	0.352060822771883	1.20759004261195e-08	F-box domain-containing protein
CITRE_003g057080	1.05278379452683	1.23535584714529e-08	Pentatricopeptide repeat-containing protein At4g01400%2C mitochondrial
CITRE_009g003060	0.873235911976082	1.23935948236124e-08	conserved hypothetical protein
CITRE_006g019350	0.48577493396709	1.24240483870425e-08	conserved hypothetical protein
CITRE_004g030370	0.740187017588982	1.2430562760696e-08	RING-type domain-containing protein
CITRE_007g005900	0.595544061221091	1.25223104480353e-08	DAO domain-containing protein
CITRE_002g034320	-0.538165401951042	1.25312876539798e-08	Protein HEAT-STRESS-ASSOCIATED 32
CITRE_006g024230	-0.268871922544836	1.26725830618722e-08	Glutamine synthetase nodule isozyme
CITRE_002g040310	0.587554375856898	1.27049654215914e-08	E3 ubiquitin-protein ligase COP1
CITRE_001g028400	0.92876195712651	1.3110959516244e-08	AP2/ERF domain-containing protein
CITRE_005g039510	0.489461860449577	1.33095405325495e-08	conserved hypothetical protein
CITRE_005g023970	-1.25631407423492	1.33719005067916e-08	Luminal-binding protein 5
CITRE_001g025550	-0.491856933009004	1.35188915562575e-08	Zinc finger CCCH domain-containing protein 18
CITRE_002g034910	0.871660416138537	1.35188915562575e-08	F-box domain-containing protein
CITRE_002g036280	-0.45726580141991	1.38234524312153e-08	C3H1-type domain-containing protein
CITRE_002g004810	-0.681868552262344	1.38553975134342e-08	Zinc finger CCCH domain-containing protein 55
CITRE_004g031040	0.294805682796648	1.38967517878771e-08	Serine/threonine-protein phosphatase PP2A catalytic subunit
CITRE_003g006300	0.643836261786191	1.39289228322814e-08	conserved hypothetical protein
CITRE_005g039320	-0.874104774014108	1.39674535828804e-08	Plastocyanin
CITRE_002g020440	0.879160001437526	1.39882912386576e-08	RRM domain-containing protein
CITRE_002g012540	-0.289180712576449	1.43064141836481e-08	conserved hypothetical protein
CITRE_007g013970	-0.60854543294435	1.46489964959584e-08	Photosystem I reaction center subunit VI-2%2C chloroplastic
CITRE_008g016420	0.473255500414476	1.47269260134367e-08	POLIIIAc domain-containing protein
CITRE_002g021660	-1.29410330820838	1.49333944399351e-08	putative Heat shock protein 90-6%2C mitochondrial
CITRE_003g042040	-0.463509297319885	1.52884024708829e-08	60S ribosomal protein L38
CITRE_005g029690	0.386992568091491	1.55961761456179e-08	Serine hydroxymethyltransferase
CITRE_005g007870	0.743969895524875	1.56435998266916e-08	Hypothetical protein
CITRE_008g027010	0.607957852592431	1.57209516203657e-08	Cytokinin riboside 5'-monophosphate phosphoribohydrolase
CITRE_006g009520	0.712509660738033	1.58322232298559e-08	PGG domain-containing protein
CITRE_008g002840	-0.383419326929642	1.59214610575611e-08	PMR5N domain-containing protein
CITRE_004g017540	-0.664276717736211	1.59630886978911e-08	putative Metacaspase-1
CITRE_039g000430	-0.560101967155465	1.60948300136534e-08	H15 domain-containing protein
CITRE_009g020810	0.313519264709722	1.61717372066465e-08	S-formylglutathione hydrolase
CITRE_004g028430	0.727717424797749	1.62553976880642e-08	putative Response regulatory domain-containing protein
CITRE_003g039340	0.698376373997882	1.6303331178443e-08	putative Disease resistance-like protein DSC1
CITRE_003g055220	0.349185791787261	1.63179327417824e-08	Protein kinase domain-containing protein
CITRE_003g037770	-0.530056835376652	1.65371753672255e-08	putative 2-alkenal reductase (NADP(+)-dependent)
CITRE_003g044870	1.13947437222198	1.76292903944391e-08	Ammonium transporter
CITRE_002g015670	0.383615349302805	1.77630230468379e-08	RING-type domain-containing protein
CITRE_003g008450	-0.440757951450098	1.79033822639981e-08	Bax inhibitor 1
CITRE_007g002490	-0.39282143835897	1.79033822639981e-08	GATA-type domain-containing protein
CITRE_002g040420	-0.547083381274626	1.84588618006688e-08	putative Uncharacterized membrane protein At1g16860
CITRE_002g014250	-0.384140485218164	1.86200227801037e-08	putative Rubis-subs-bind domain-containing protein
CITRE_008g021510	0.49118317519634	1.87037901870205e-08	conserved hypothetical protein
CITRE_006g029400	0.795744138808055	1.90035193228448e-08	Pentatricopeptide repeat-containing protein At5g15300
CITRE_002g040220	-0.287014359987259	1.92307525535056e-08	Pyrophosphate--fructose 6-phosphate 1-phosphotransferase subunit beta
CITRE_002g026160	-0.829627851126128	1.93164901758939e-08	Aspartate-semialdehyde dehydrogenase
CITRE_007g020630	-0.287534665627057	1.95516568265873e-08	Protein LPA3
CITRE_001g001200	0.482941916795942	1.97209217870746e-08	Protein-serine/threonine phosphatase
CITRE_007g019520	0.258670185197399	1.998188943644e-08	putative BRAP2 RING ZnF UBP domain-containing protein 2
CITRE_008g004730	1.34626725926797	1.998188943644e-08	Limonoid UDP-glucosyltransferase
CITRE_009g001950	-0.957878589712977	2.01386671397762e-08	putative beta-D-xylosidase 2
CITRE_001g006550	0.657677803743418	2.0276445467333e-08	Beta-fructofuranosidase%2C insoluble isoenzyme CWINV1
CITRE_008g009350	0.470806860360059	2.0276445467333e-08	BZIP domain-containing protein
CITRE_009g007470	0.531878078684619	2.03598131534507e-08	Guanine nucleotide-binding protein subunit gamma 2
CITRE_007g013130	0.497249990916456	2.0606483609489e-08	Polynucleotide adenylyltransferase
CITRE_003g044650	0.387738329865134	2.08506401437802e-08	Inositol-tetrakisphosphate 1-kinase
CITRE_002g016980	0.473281303645453	2.10795336971429e-08	conserved hypothetical protein
CITRE_003g014910	0.55768300980352	2.11049996205136e-08	Hypothetical protein
CITRE_002g007920	0.898058675254434	2.12887025060408e-08	Hypothetical protein
CITRE_007g000330	1.061490943869	2.1472924754139e-08	Pentatricopeptide repeat-containing protein At2g17525%2C mitochondrial
CITRE_008g004720	0.733279047155709	2.14787414369448e-08	Triacylglycerol lipase 1
CITRE_004g024910	-0.3862307697497	2.16334703648658e-08	RING-type domain-containing protein
CITRE_005g024730	-0.890558468171969	2.17073630994723e-08	Single-stranded DNA-binding protein%2C mitochondrial
CITRE_004g014540	-0.397702293573703	2.22664206264638e-08	Pyruvate kinase
CITRE_002g022740	0.35429658164181	2.2407885681848e-08	Protein NOI4
CITRE_001g025270	0.785644636772803	2.24368574137462e-08	conserved hypothetical protein
CITRE_006g019370	2.34150299450755	2.24368574137462e-08	Calcium-dependent protein kinase 20
CITRE_009g023270	-0.786448477889164	2.28973753401336e-08	putative LRR receptor-like serine/threonine-protein kinase EFR
CITRE_003g046380	0.31494135728507	2.29354350296798e-08	TATA-box-binding protein
CITRE_002g037830	0.450590429810803	2.45231394340677e-08	Plug_translocon domain-containing protein
CITRE_007g012610	-0.473710924269781	2.50496818721431e-08	conserved hypothetical protein
CITRE_009g009200	0.652327475762276	2.50496818721431e-08	Fe2OG dioxygenase domain-containing protein
CITRE_002g026360	1.16379418692114	2.59559633583385e-08	conserved hypothetical protein
CITRE_008g026960	-0.453112626297382	2.60128684864239e-08	Zinc finger C3HC4-type RING finger family protein
CITRE_001g002770	1.02892083234334	2.60563217892938e-08	conserved hypothetical protein
CITRE_001g009720	-0.317603630005153	2.63299804108446e-08	Glutaredoxin-dependent peroxiredoxin
CITRE_002g038500	-0.352618282709087	2.63299804108446e-08	putative Pre-mRNA-processing factor 39-2
CITRE_004g013380	0.271469742218896	2.63299804108446e-08	putative Binding partner of ACD11 1
CITRE_008g032410	0.377081362564689	2.63386480128626e-08	NAD-dependent epimerase/dehydratase
CITRE_008g027790	1.08172921915858	2.69686441663889e-08	putative Pentatricopeptide repeat-containing protein At3g25210%2C mitochondrial
CITRE_007g006720	-0.773566327545077	2.72293191157284e-08	RuvB-like helicase
CITRE_001g029020	0.589785532104664	2.76891307569221e-08	RING-type domain-containing protein
CITRE_008g001520	0.258599762927661	2.76891307569221e-08	Protein-serine/threonine phosphatase
CITRE_002g036870	0.216024406180937	2.83151739007238e-08	Apoptosis inhibitor 5-like protein API5
CITRE_002g040140	-0.335179340778509	2.8361794798532e-08	Plant UBX domain-containing protein 4
CITRE_005g028050	-0.237376357587012	2.83685970828131e-08	Protein CutA%2C chloroplastic
CITRE_007g022160	-0.380755170747872	2.85177996900256e-08	DUF2470 domain-containing protein
CITRE_001g008160	0.719976226532858	2.93896756475951e-08	Sodium/pyruvate cotransporter BASS2%2C chloroplastic
CITRE_006g017350	-0.395260134327033	2.97671495517559e-08	putative 60S ribosomal protein L27
CITRE_006g010790	0.594862681819404	3.04451553386731e-08	ABC transporter domain-containing protein
CITRE_002g006080	0.390707322273418	3.11490711239189e-08	RRM domain-containing protein
CITRE_006g029250	0.701373318156322	3.11511002611543e-08	conserved hypothetical protein
CITRE_002g021880	0.463539910183643	3.12383083086558e-08	Pentatricopeptide repeat-containing protein At4g26680%2C mitochondrial
CITRE_001g014070	0.386894606595134	3.13651414328944e-08	conserved hypothetical protein
CITRE_003g061880	-0.817084442168603	3.13651414328944e-08	putative T-complex protein 1 subunit alpha
CITRE_004g027110	0.657254000934726	3.15190623091444e-08	putative K-box domain-containing protein
CITRE_002g028310	-0.416368016414033	3.15567746290833e-08	DNA-directed RNA polymerases II%2C IV and V subunit 12
CITRE_005g029700	0.658791426162095	3.20774711065516e-08	conserved hypothetical protein
CITRE_011g000060	0.433141453686268	3.20774711065516e-08	conserved hypothetical protein
CITRE_003g023520	0.44103324514483	3.28273976727498e-08	conserved hypothetical protein
CITRE_002g031120	-0.458553101300975	3.32960404297594e-08	Protein argonaute 2
CITRE_006g028190	0.337732378222066	3.33357592270633e-08	putative Inositol hexakisphosphate and diphosphoinositol-pentakisphosphate kinase VIP2
CITRE_006g023440	0.466516067434316	3.3435267812698e-08	HTH myb-type domain-containing protein
CITRE_007g010420	0.500326829650771	3.3435267812698e-08	conserved hypothetical protein
CITRE_009g001150	-0.932470116902889	3.39122122734792e-08	conserved hypothetical protein
CITRE_002g010620	0.49061329154817	3.40597249655533e-08	conserved hypothetical protein
CITRE_002g038660	0.623346537883901	3.51363332702625e-08	Purine permease 21
CITRE_007g022520	1.7985236091436	3.5565108429251e-08	conserved hypothetical protein
CITRE_003g004450	0.270171113630223	3.5622582676927e-08	5-formyltetrahydrofolate cyclo-ligase
CITRE_009g004610	-1.33459501345284	3.5622582676927e-08	S-adenosylmethionine decarboxylase proenzyme
CITRE_002g012520	0.698413847191457	3.56876940795128e-08	Glycosyltransferase
CITRE_002g020240	-0.295705565966185	3.56876940795128e-08	LysM domain receptor-like kinase 3
CITRE_003g029620	0.284194445469694	3.57249944679667e-08	Smg4_UPF3 domain-containing protein
CITRE_003g059690	-0.332736465194202	3.58603234867547e-08	putative Beta-amylase 7
CITRE_006g023730	0.562258934578619	3.67106223491293e-08	putative protein-tyrosine-phosphatase
CITRE_002g004220	0.613621695928165	3.71846150362829e-08	Chaperonin-like RbcX protein 2%2C chloroplastic
CITRE_005g039610	0.397466465701502	3.77540771025751e-08	SWIRM domain-containing protein
CITRE_009g006240	0.29136211575995	3.78577357840701e-08	SurE domain-containing protein
CITRE_003g059900	-0.477525365386846	3.83398065354713e-08	putative FT-interacting protein 3
CITRE_004g022380	-0.626381367156242	3.88292701171175e-08	putative disease resistance protein At4g19050
CITRE_181g000010	3.01800882212922	3.88292701171175e-08	conserved hypothetical protein
CITRE_004g004600	0.464748747094439	3.88376212689184e-08	Geranylgeranyl transferase type-1 subunit beta
CITRE_006g020870	-1.32233214089135	3.88376212689184e-08	Carbonic anhydrase
CITRE_001g011430	-0.535915674171294	3.95265392324891e-08	Malonyl-CoA:anthocyanidin 5-O-glucoside-6''-O-malonyltransferase
CITRE_007g013610	-0.93872031815185	4.00004558099075e-08	Ribonuclease Z
CITRE_009g030030	0.402185031148885	4.08187169971835e-08	Ubiquitin-NEDD8-like protein RUB1
CITRE_003g003520	0.317475979916466	4.08638151824587e-08	Serine/threonine-protein kinase BSK7
CITRE_007g032480	-0.3707169250174	4.14049191322486e-08	60S ribosomal protein L30
CITRE_005g026800	-0.796977829174298	4.1567085007679e-08	DUF676 domain-containing protein
CITRE_005g024160	0.750893976703628	4.23291965065163e-08	HIG1 domain-containing protein
CITRE_006g029080	0.904267802235818	4.28910008295139e-08	RING-CH-type domain-containing protein
CITRE_002g007910	-0.820579176930179	4.33618869090362e-08	Carbonic anhydrase
CITRE_007g026330	0.299323593140347	4.37549516369945e-08	F-box domain-containing protein
CITRE_003g003020	0.815988672161551	4.45234578781786e-08	conserved hypothetical protein
CITRE_004g029610	-0.889936431656196	4.45563542861339e-08	MFS domain-containing protein
CITRE_004g008310	0.520913529606243	4.46681686488451e-08	Glycerol-3-phosphate dehydrogenase
CITRE_006g020680	0.799208597894769	4.4943324666767e-08	conserved hypothetical protein
CITRE_006g028800	-0.729180132466155	4.53039635087985e-08	RNA helicase
CITRE_008g001000	0.354641126122756	4.58740418627642e-08	F-box domain-containing protein
CITRE_002g004120	-0.606390268642006	4.61177117470623e-08	tRNA-5-taurinomethyluridine 2-sulfurtransferase
CITRE_005g007380	0.191539643200525	4.65850868065912e-08	Transmembrane 9 superfamily member
CITRE_007g014790	-1.3746960881311	4.66235632226985e-08	STAS domain-containing protein
CITRE_001g001690	-0.382968413248117	4.71437079073989e-08	conserved hypothetical protein
CITRE_005g020820	2.95292349474742	4.71437079073989e-08	conserved hypothetical protein
CITRE_001g035020	0.464076871261849	4.74885045935846e-08	Replication termination factor 2
CITRE_001g027540	-0.77722008472518	4.75312231592391e-08	Cytochrome c oxidase assembly protein COX15
CITRE_008g017370	1.1301916176025	4.75765468778516e-08	ATPase_AAA_core domain-containing protein
CITRE_004g029820	0.69665657527046	4.78218764076705e-08	putative Pyroglutamyl-peptidase I
CITRE_004g007620	-0.76199144642246	4.79881496571214e-08	putative Thioredoxin domain-containing protein
CITRE_008g012480	-0.240021829918319	4.83792843911981e-08	Methylmalonate-semialdehyde dehydrogenase [acylating]%2C mitochondrial
CITRE_001g024260	0.61713006334624	4.86058410897869e-08	putative ATP synthase gamma chain%2C chloroplastic
CITRE_003g050900	0.622121310733192	4.86576260745925e-08	C2H2-type domain-containing protein
CITRE_004g034420	-0.392979160978415	4.89456813183725e-08	ADP%2CATP carrier protein 1%2C mitochondrial
CITRE_003g038160	0.346771896977085	5.11248038936527e-08	BTB/POZ and TAZ domain-containing protein 3
CITRE_002g018000	0.403686936116873	5.11341425472651e-08	conserved hypothetical protein
CITRE_003g002060	-0.644680411733453	5.13670119292226e-08	conserved hypothetical protein
CITRE_002g035400	0.608630636953384	5.21789075163343e-08	conserved hypothetical protein
CITRE_004g026550	0.436525815957983	5.21789075163343e-08	Pentatricopeptide repeat-containing protein At1g69290
CITRE_007g029070	-0.649971149328881	5.26165110570656e-08	RING-type E3 ubiquitin transferase
CITRE_005g028610	-0.379614917942644	5.32752380405728e-08	14-3-3-like protein
CITRE_009g005130	0.568933192512434	5.45313411488453e-08	DLH domain-containing protein
CITRE_003g055280	0.636308236271633	5.46234630524327e-08	conserved hypothetical protein
CITRE_006g022760	2.69119893619833	5.47462082083434e-08	Hypothetical protein
CITRE_002g035920	-0.606072139645538	5.5345325727758e-08	putative 50S ribosomal protein L21%2C mitochondrial
CITRE_006g030310	0.382962576942535	5.58878415252656e-08	conserved hypothetical protein
CITRE_002g031660	-0.272288777919404	5.62803990014165e-08	conserved hypothetical protein
CITRE_002g026400	0.975615682214079	5.6358926968158e-08	putative Zinc finger protein VAR3%2C chloroplastic
CITRE_004g019510	-0.733496255722913	5.67369715006671e-08	conserved hypothetical protein
CITRE_002g036310	-1.1333311031477	5.70671577294562e-08	Hypothetical protein
CITRE_001g006150	0.331914721517642	5.72051058587456e-08	K(+) efflux antiporter 6
CITRE_001g030630	0.667912053517942	5.72051058587456e-08	PB1 domain-containing protein
CITRE_003g047740	0.341758312973445	5.72051058587456e-08	RING-type domain-containing protein
CITRE_001g025510	-0.59255231485881	5.73737829647492e-08	Transcription termination factor MTERF9%2C chloroplastic
CITRE_005g021870	0.514841811627603	5.77700257384155e-08	Sugar transporter ERD6-like 5
CITRE_001g011080	-0.749801287596595	5.78202069157931e-08	Glutathione hydrolase
CITRE_003g021120	0.922554887881042	5.79833804022715e-08	Cytochrome P450 CYP72A219
CITRE_005g013080	-0.684497025389288	5.82574697227321e-08	LRRNT_2 domain-containing protein
CITRE_003g061910	0.507768125917821	5.84802618910118e-08	conserved hypothetical protein
CITRE_003g058440	0.391843871853285	5.894638718251e-08	Mitochondrial adenine nucleotide transporter ADNT1
CITRE_002g004530	0.544150554690927	6.00704049196249e-08	conserved hypothetical protein
CITRE_002g033280	0.617628323885199	6.00704049196249e-08	MFS domain-containing protein
CITRE_001g011600	-0.428272642267052	6.09252064713212e-08	conserved hypothetical protein
CITRE_007g015760	0.548709377012774	6.16624335107967e-08	putative Wall-associated receptor kinase-like 9
CITRE_001g001940	0.393918505062487	6.36379893763992e-08	Cytochrome b561%2C DM13 and DOMON domain-containing protein At5g54830
CITRE_001g006860	0.260948503040193	6.36379893763992e-08	MBD domain-containing protein
CITRE_004g023380	0.282344893365169	6.36379893763992e-08	4-hydroxybenzoate polyprenyltransferase%2C mitochondrial
CITRE_002g016800	0.967112864370689	6.48173272544531e-08	AP2/ERF domain-containing protein
CITRE_002g022880	0.437053014384193	6.59448194215614e-08	Ribonuclease E/G-like protein%2C chloroplastic
CITRE_006g014850	-0.369099358972089	6.60168795430455e-08	Protein DETOXIFICATION
CITRE_003g010310	-0.247504038239254	6.63334700724072e-08	FAM10 family protein At4g22670
CITRE_003g012990	0.416755772591387	6.76037878269675e-08	Diacylglycerol kinase
CITRE_102g000180	3.1201012505033	6.76037878269675e-08	conserved hypothetical protein
CITRE_009g031120	1.81501424092457	6.83224460247118e-08	putative Pentatricopeptide repeat-containing protein At2g13600
CITRE_002g041580	1.50670441561569	6.88966474293753e-08	ATP-dependent 6-phosphofructokinase
CITRE_004g025220	-0.53452664392633	6.99739077396315e-08	putative DNL-type domain-containing protein
CITRE_003g050200	0.271785911738653	7.04171009774119e-08	BHLH domain-containing protein
CITRE_001g031520	-0.291945865138953	7.04431352191198e-08	60S ribosomal protein L7-2
CITRE_004g020670	-0.32462525545936	7.26927841446341e-08	MLO-like protein 1
CITRE_004g026440	-0.62677461124372	7.41680067323682e-08	Glutamine amidotransferase type-2 domain-containing protein
CITRE_008g029020	-0.320887054901918	7.42757850609545e-08	Ribosomal_L23eN domain-containing protein
CITRE_009g003020	-0.343377376896498	7.42931892023481e-08	Dihydrolipoamide acetyltransferase component of pyruvate dehydrogenase complex
CITRE_001g015790	0.586644057162693	7.44825653757971e-08	TCP domain-containing protein
CITRE_003g031100	0.880631233883344	7.59403224641613e-08	Protein kinase domain-containing protein
CITRE_002g024510	-0.449197639812851	7.81422428898654e-08	Poly(A)-specific ribonuclease PARN-like
CITRE_002g040620	0.442462137312034	7.95256965880585e-08	conserved hypothetical protein
CITRE_008g028130	0.57979843037759	7.96736535045975e-08	conserved hypothetical protein
CITRE_009g007280	0.377500872019405	8.18228293537452e-08	Aldo_ket_red domain-containing protein
CITRE_004g012570	-0.461165335840458	8.54600875856073e-08	conserved hypothetical protein
CITRE_008g024980	0.301037810733933	8.550271766495e-08	UDP-D-apiose/UDP-D-xylose synthase 2
CITRE_003g047250	0.328290451390179	8.76792273305321e-08	MFAP1 domain-containing protein
CITRE_004g032000	-0.804948129663864	8.76792273305321e-08	putative protein PHYTOCHROME KINASE SUBSTRATE 2
CITRE_007g006130	-1.00946591420032	8.84404325301215e-08	C2H2-type domain-containing protein
CITRE_009g010960	0.592944380710066	8.88750833282334e-08	conserved hypothetical protein
CITRE_005g026460	-0.263317640762258	8.92723416972746e-08	Calcium-transporting ATPase
CITRE_009g018570	0.781383081140554	9.07870663853418e-08	Str_synth domain-containing protein
CITRE_002g014580	0.397247976967365	9.16377394289423e-08	putative Glucose-6-phosphate 1-dehydrogenase%2C cytoplasmic isoform
CITRE_004g032580	-0.349573520505118	9.18935442879225e-08	SEC7 domain-containing protein
CITRE_002g040850	-0.572667293368398	9.35820099755029e-08	Thymidine kinase
CITRE_008g003580	0.710282765634635	9.50722174094125e-08	conserved hypothetical protein
CITRE_009g000770	0.5183414428889	9.54552526684651e-08	Protein-serine/threonine phosphatase
CITRE_007g020920	-1.71443659842779	9.57500988930021e-08	Heat shock 70 kDa protein 5
CITRE_009g031900	-1.14717601722136	9.59511348323395e-08	LOB domain-containing protein
CITRE_007g002260	1.34078049432308	9.67376843350234e-08	conserved hypothetical protein
CITRE_008g021000	0.389267814271424	9.69519678730031e-08	conserved hypothetical protein
CITRE_005g028790	0.324749806782267	9.71081042342619e-08	PORR domain-containing protein
CITRE_009g030680	-0.81250910786556	9.79945633077047e-08	C2 domain-containing protein
CITRE_002g014260	-0.460315861647771	9.96950053282792e-08	putative Rubis-subs-bind domain-containing protein
CITRE_003g009730	0.533691003964494	1.00486799832772e-07	Autophagy-related protein 8f
CITRE_002g021610	-0.44909639129948	1.00577459383095e-07	Histidine kinase
CITRE_003g036700	-0.911880334068748	1.02382781517893e-07	IU_nuc_hydro domain-containing protein
CITRE_007g000880	-0.39148336573681	1.02464559817695e-07	CRAL-TRIO domain-containing protein
CITRE_005g037270	0.341205812209095	1.04267685325346e-07	Tubby-like F-box protein
CITRE_008g008360	0.238609584310896	1.0451169269023e-07	putative Ras-related protein Rab7
CITRE_002g026120	-0.48473762736733	1.07275093490595e-07	MACPF domain-containing protein
CITRE_005g001440	-0.719441071563841	1.07442178143586e-07	putative Mitogen-activated protein kinase kinase kinase 1b
CITRE_006g014770	-0.238959935440602	1.0776811454165e-07	conserved hypothetical protein
CITRE_006g003680	0.330297661525979	1.10467220509211e-07	PPM-type phosphatase domain-containing protein
CITRE_008g013840	-0.517674379964184	1.10467220509211e-07	conserved hypothetical protein
CITRE_005g011590	0.312053208902415	1.11805199971411e-07	Protein kinase domain-containing protein
CITRE_001g023570	-0.819148307414104	1.12361095912629e-07	conserved hypothetical protein
CITRE_006g002430	-0.438688268626193	1.1250551225725e-07	Phosphoglycolate phosphatase 1A%2C chloroplastic
CITRE_001g030740	-0.44179981226966	1.14018626002521e-07	MFS domain-containing protein
CITRE_005g011700	-0.525460492659934	1.14262383727146e-07	putative Dynamin-like protein ARC5
CITRE_005g036970	0.460182390340542	1.16861412337041e-07	conserved hypothetical protein
CITRE_001g018710	-0.656233101126101	1.1705795428127e-07	tRNA (guanine(37)-N1)-methyltransferase
CITRE_005g010390	-0.476803235685843	1.20351961933764e-07	Ribosome assembly factor mrt4
CITRE_009g024470	-0.381917281065986	1.20549595463368e-07	OTU domain-containing protein
CITRE_003g053810	-0.615379512346093	1.22269839344479e-07	Brix domain-containing protein
CITRE_003g021660	1.54899706514351	1.23861063419093e-07	9-cis-epoxycarotenoid dioxygenase 3
CITRE_008g030560	0.579517560125523	1.23861063419093e-07	Tropinone reductase
CITRE_007g009620	-0.871350992043329	1.24197345568294e-07	Phosphatidylinositol 4-phosphate 5-kinase
CITRE_005g036760	0.311775453109631	1.26323228316998e-07	COP9 signalosome complex subunit 4
CITRE_009g004340	-0.922403980008347	1.27077153444343e-07	1-deoxy-D-xylulose-5-phosphate synthase
CITRE_007g008020	-0.401690094831039	1.27613388458207e-07	Kinesin motor domain-containing protein
CITRE_008g007080	0.873399963067995	1.28434094041386e-07	Pentatricopeptide repeat-containing protein At2g15630%2C mitochondrial
CITRE_004g026530	0.576234077258774	1.36703228067291e-07	Purple acid phosphatase
CITRE_002g002890	-0.786868107985574	1.37019813206842e-07	JmjC domain-containing protein
CITRE_009g031960	0.499042487353698	1.3754868549599e-07	conserved hypothetical protein
CITRE_005g001450	-0.654441186245887	1.37577958529643e-07	putative Mitogen-activated protein kinase kinase kinase 1
CITRE_174g000030	-0.742833291223545	1.3763405566039e-07	SAM_MT_RSMB_NOP domain-containing protein
CITRE_007g016500	0.380247335374615	1.40034227259348e-07	Cytochrome c oxidase subunit 5b-1%2C mitochondrial
CITRE_007g007600	0.801846507606836	1.4340668884034e-07	conserved hypothetical protein
CITRE_003g019470	1.94096174784097	1.44385241273211e-07	Inhibitor of trypsin and hageman factor
CITRE_007g018690	-0.561908624821502	1.48263722089647e-07	putative F-box/LRR-repeat protein 4
CITRE_009g003870	1.34227323106254	1.49500627298176e-07	Glutaredoxin domain-containing protein
CITRE_007g003890	0.517063082543386	1.49547451014806e-07	BZIP domain-containing protein
CITRE_002g038400	0.842424872414998	1.52122645998285e-07	hypothetical protein
CITRE_007g013190	-0.510260667340765	1.52478945993525e-07	TauD domain-containing protein
CITRE_009g006060	0.965608830488198	1.52540374220596e-07	conserved hypothetical protein
CITRE_001g010920	-1.75263379012672	1.52717431116547e-07	Hypothetical protein
CITRE_004g000190	-0.423875613248939	1.5665596694614e-07	FtsJ domain-containing protein
CITRE_001g001600	0.699070880902265	1.5688041345657e-07	putative Pentatricopeptide repeat-containing protein At3g29230
CITRE_006g029700	-0.439958952858207	1.57321111877542e-07	CaM_binding domain-containing protein
CITRE_003g044510	-0.690699842021951	1.57611669027406e-07	putative protein TORMOZ EMBRYO DEFECTIVE
CITRE_001g018480	0.853332840289526	1.58416777775176e-07	Dynein light chain
CITRE_007g011470	0.549384191486015	1.59589431070314e-07	GTP diphosphokinase
CITRE_002g036390	0.339612959953585	1.61621696589214e-07	putative protein DEHYDRATION-INDUCED 19
CITRE_009g016540	0.449463770817969	1.63550274362898e-07	Sucrose-phosphate synthase
CITRE_006g026950	0.669918934824635	1.65754095656189e-07	PI-PLC X domain-containing protein At5g67130
CITRE_004g000610	0.369321921601043	1.6658534016174e-07	Protein YIP
CITRE_006g026050	0.220524443427729	1.68561160263976e-07	conserved hypothetical protein
CITRE_003g001500	-0.443100830304729	1.68912392870309e-07	Nucleoside diphosphate kinase
CITRE_009g001280	0.459176136875261	1.68912392870309e-07	Prefoldin subunit 3
CITRE_006g023800	0.453312870400871	1.68982620319766e-07	Peptidase A1 domain-containing protein
CITRE_009g020480	-1.49079031779069	1.69194003028032e-07	Glucan endo-1%2C3-beta-D-glucosidase
CITRE_004g023500	0.386853924060989	1.69490234132996e-07	putative ADP-ribosylation factor-like protein 2
CITRE_002g027480	-0.602010448462875	1.74762028823956e-07	Protein PIN-LIKES 2
CITRE_004g024570	0.511822258496423	1.77771671081212e-07	Non-specific serine/threonine protein kinase
CITRE_002g029350	-0.788831199881055	1.78596656180862e-07	conserved hypothetical protein
CITRE_049g000550	2.81894167789857	1.78634754498195e-07	conserved hypothetical protein
CITRE_003g002710	-1.89935290675133	1.83446046839641e-07	Heat shock protein 83
CITRE_004g034670	0.323313045347854	1.83615214575618e-07	PHD-type domain-containing protein
CITRE_007g027100	0.573491924350137	1.83615214575618e-07	hypothetical protein
CITRE_008g019810	-0.554608306318566	1.83615214575618e-07	Peptidyl-prolyl cis-trans isomerase
CITRE_008g002150	-0.572033448028372	1.86088315529214e-07	Subtilisin-like protease SBT1.6
CITRE_007g030350	-0.261938221854452	1.87518182245497e-07	putative ATP synthase 24 kDa subunit%2C mitochondrial
CITRE_002g028390	0.305919372584001	1.90245158198146e-07	putative LEAF RUST 10 DISEASE-RESISTANCE LOCUS RECEPTOR-LIKE PROTEIN KINASE-like 1.1
CITRE_005g026420	0.733574612827539	1.90675621722097e-07	Heptahelical transmembrane protein 4
CITRE_008g026170	-0.385690828672594	1.96758881888248e-07	DNA ligase
CITRE_009g027570	-0.440320260917324	1.98164064079906e-07	Nucleotide-sensitive chloride conductance regulator
CITRE_005g029710	-0.484362355861738	2.02016232675017e-07	GrpE protein
CITRE_001g007410	0.726769757136493	2.10070870733927e-07	conserved hypothetical protein
CITRE_009g023200	-0.308542390148123	2.154121015761e-07	Protein kinase domain-containing protein
CITRE_005g023460	-0.443511255865487	2.18839994015862e-07	Aminopeptidase P2
CITRE_009g019600	-0.676426567591664	2.20008395710037e-07	conserved hypothetical protein
CITRE_001g011490	-0.514574594795403	2.20229368433995e-07	40S ribosomal protein S15a-5
CITRE_003g024420	-0.573259255077954	2.20573563511238e-07	conserved hypothetical protein
CITRE_007g003190	-0.684848886646304	2.20682593699129e-07	DYW_deaminase domain-containing protein
CITRE_003g054490	0.514936448668544	2.24710574732233e-07	putative protein DEHYDRATION-INDUCED 19
CITRE_002g029020	0.620476126954849	2.26873850733374e-07	CHCH domain-containing protein
CITRE_005g026510	0.36080699799715	2.28124244390753e-07	Lecithin-cholesterol acyltransferase-like 1
CITRE_003g050300	-0.602414273254459	2.2865553382488e-07	H15 domain-containing protein
CITRE_005g013420	-0.438674773391351	2.30287995318593e-07	Transcription factor GAMYB
CITRE_003g025610	0.924852800713156	2.33807534453202e-07	Hypothetical protein
CITRE_006g029190	0.452931767830013	2.43372799782e-07	Glyco_transf_5 domain-containing protein
CITRE_004g025330	1.55602826687847	2.43643051993528e-07	RING-type domain-containing protein
CITRE_008g028100	-0.613139123009318	2.44129566397232e-07	Carbamoyl-phosphate synthase (glutamine-hydrolyzing)
CITRE_005g037090	-0.322318013810608	2.48791739919379e-07	conserved hypothetical protein
CITRE_003g062840	-0.648367738522059	2.49310173319015e-07	10 kDa chaperonin 2%2C chloroplastic
CITRE_002g006650	-0.33512315468181	2.55027011626063e-07	conserved hypothetical protein
CITRE_004g029190	0.47138531910992	2.58547011141593e-07	conserved hypothetical protein
CITRE_002g002440	1.23662999836997	2.59110707728022e-07	Bulb-type lectin domain-containing protein
CITRE_001g032340	0.34735391669799	2.68881825198069e-07	SNRNP27 domain-containing protein
CITRE_001g019880	-0.956363258683414	2.69187189275692e-07	conserved hypothetical protein
CITRE_009g027520	1.31256065880722	2.74025044787003e-07	conserved hypothetical protein
CITRE_005g012980	0.327081140970347	2.75916151052208e-07	Fucosyltransferase
CITRE_009g024360	-0.288345355606643	2.78148794406987e-07	Hypothetical protein
CITRE_005g040170	-0.452939179281399	2.79458398441298e-07	Glutamate receptor
CITRE_001g024140	-0.420425303921989	2.81924880189302e-07	putative PGG domain-containing protein
CITRE_001g007940	0.7537130914878	2.83805438191809e-07	3-ketoacyl-CoA synthase
CITRE_002g020170	1.42144623041216	2.83940500197711e-07	Fatty acid hydroperoxide lyase%2C chloroplastic
CITRE_002g016520	0.400461721565341	2.8410204502621e-07	Pentatricopeptide repeat-containing protein At1g03560%2C mitochondrial
CITRE_007g026990	-1.58981905827271	2.87742352090218e-07	NAC
CITRE_005g005020	-0.46889580089315	2.90187486227063e-07	Myb_DNA-bind_3 domain-containing protein
CITRE_006g029500	0.29290197377845	2.90187486227063e-07	Pectinesterase
CITRE_006g021780	0.302662069786651	2.96485752601061e-07	C2H2-type domain-containing protein
CITRE_003g049680	-0.457441717949435	2.980662468953e-07	Rho_N domain-containing protein
CITRE_002g004840	0.25484868203865	3.00253609925168e-07	putative Receptor-like protein 35
CITRE_004g034560	0.537886614375506	3.03906220469243e-07	Nuclear transcription factor Y subunit
CITRE_004g028410	0.762796098172881	3.08492687435101e-07	TPX2 domain-containing protein
CITRE_004g019590	-0.299446755440497	3.08936913247132e-07	Lipase_3 domain-containing protein
CITRE_003g032240	1.32024987101146	3.10647952890959e-07	Hypothetical protein
CITRE_002g037530	0.402565842809013	3.12068352528905e-07	Non-specific serine/threonine protein kinase
CITRE_009g032130	0.727141458623199	3.12068352528905e-07	conserved hypothetical protein
CITRE_006g006750	0.391143518503077	3.16821594728105e-07	conserved hypothetical protein
CITRE_007g011720	0.291506902949874	3.20745744619679e-07	VWFA domain-containing protein
CITRE_008g001920	0.459773530038887	3.23437035667269e-07	HMA domain-containing protein
CITRE_002g012470	0.481178841810953	3.28280745385293e-07	putative Long chain base biosynthesis protein 2a
CITRE_006g016260	-0.391074724968477	3.28280745385293e-07	N-acetyltransferase domain-containing protein
CITRE_007g013140	1.04195970537298	3.28663591310135e-07	Phosphotransferase
CITRE_001g012790	0.258098572178772	3.34995232083554e-07	Nucleosome assembly protein 1%3B2
CITRE_006g007380	0.774871646736712	3.3665530386465e-07	Cytokinin riboside 5'-monophosphate phosphoribohydrolase
CITRE_007g025270	0.355930555737691	3.40604394324071e-07	putative Nardilysin-like
CITRE_002g029310	0.39880922735002	3.4532895066104e-07	Mitochondrial proton/calcium exchanger protein
CITRE_004g025490	-0.421493173252883	3.4532895066104e-07	Peroxidase
CITRE_006g004460	0.310691669137846	3.4532895066104e-07	UDP-arabinopyranose mutase
CITRE_003g026920	0.51014645686466	3.47119772095783e-07	putative RRM domain-containing protein
CITRE_003g052300	-0.388972887322373	3.50715304538261e-07	S1 domain-containing protein
CITRE_006g012630	-1.68866531779153	3.52368407515385e-07	PfkB domain-containing protein
CITRE_001g019830	-1.20636029285019	3.58639747412352e-07	Indole-3-acetic acid-amido synthetase GH3.6
CITRE_004g022680	0.552660264882009	3.61751103358734e-07	conserved hypothetical protein
CITRE_005g030430	0.387469961551849	3.61751103358734e-07	General transcription and DNA repair factor IIH subunit TFB4
CITRE_007g014520	0.387428832633994	3.68357696734762e-07	putative protein ROLLING AND ERECT LEAF 2
CITRE_001g006540	0.322153840041313	3.71500282549969e-07	C2H2-type domain-containing protein
CITRE_009g026210	-0.405990143255537	3.80461222209263e-07	60S ribosomal protein L15
CITRE_002g039700	0.920939522115114	3.83258106400732e-07	Thioredoxin domain-containing protein
CITRE_003g047210	0.256893065877289	3.95541137379431e-07	BTB/POZ and MATH domain-containing protein 4
CITRE_002g001740	-1.55239700170069	4.05416716035269e-07	Peroxidase
CITRE_003g009160	-0.748249653980167	4.06652527916204e-07	conserved hypothetical protein
CITRE_219g000040	0.38575406475851	4.07183698426982e-07	DUF641 domain-containing protein
CITRE_004g028370	-0.291435647652914	4.07358610745781e-07	Protein HHL1%2C chloroplastic
CITRE_007g001590	1.3830812423665	4.12213619081622e-07	Oligopeptide transporter 7
CITRE_005g039750	-0.278081728376293	4.1603248065701e-07	WD repeat-containing protein DWA2
CITRE_003g005790	0.429044154304431	4.16295229640736e-07	putative Kinetochore protein SPC25
CITRE_004g020640	-0.229189409352469	4.18852288588516e-07	Ribose-phosphate diphosphokinase
CITRE_005g027250	-0.723315038496935	4.20747637895804e-07	putative Phosphoglycerate mutase-like protein 1
CITRE_008g027440	0.549534182174855	4.3515169565927e-07	RING-type E3 ubiquitin transferase
CITRE_009g015940	0.535276661665682	4.39442402775527e-07	(3S%2C6E)-nerolidol synthase 1
CITRE_001g016010	0.692518873163154	4.42134884731337e-07	conserved hypothetical protein
CITRE_007g004590	-0.361922871839165	4.43333789863121e-07	Nuclear pore complex protein NUP58
CITRE_005g026610	0.602495555567548	4.47910896706872e-07	Squalene monooxygenase
CITRE_002g039330	1.01345316239014	4.49816193206564e-07	VQ domain-containing protein
CITRE_005g024060	-0.365090813739716	4.54659748339553e-07	ATP-dependent Clp protease proteolytic subunit
CITRE_004g021440	-0.471115892760182	4.56160336775464e-07	S5 DRBM domain-containing protein
CITRE_008g003190	-0.734320077885233	4.58128700946016e-07	Pyruvate kinase
CITRE_007g024940	0.621989590502921	4.65254810537767e-07	EngB-type G domain-containing protein
CITRE_005g032060	-0.223833911958858	4.66621225608617e-07	Exostosin domain-containing protein
CITRE_006g026800	-0.314891220625218	4.67523892882721e-07	Conserved oligomeric Golgi complex subunit 6
CITRE_007g009870	0.47731996791635	4.67637212430435e-07	M20_dimer domain-containing protein
CITRE_006g020330	0.687346250791759	4.76636950270897e-07	TF-B3 domain-containing protein
CITRE_007g024910	0.621756312747242	4.81628151093209e-07	Non-specific serine/threonine protein kinase
CITRE_002g038240	0.615077728170771	4.85636229376784e-07	Bidirectional sugar transporter SWEET
CITRE_003g050170	0.381747693901752	4.8601301029962e-07	F-box domain-containing protein
CITRE_007g009530	0.50472646226756	4.93735813616303e-07	TOM1-like protein 5
CITRE_002g038010	-0.6916762142365	4.96476829030524e-07	Aquaporin NIP1-2
CITRE_001g001520	-0.410312706771953	5.0159055236833e-07	conserved hypothetical protein
CITRE_006g017850	0.346074417006352	5.0159055236833e-07	putative UDP-rhamnose/UDP-galactose transporter 2
CITRE_005g032150	0.684774216317333	5.04144540050234e-07	Alcohol dehydrogenase 1
CITRE_005g034420	-0.324148420839749	5.04228997261648e-07	DLH domain-containing protein
CITRE_009g005160	0.891598054878098	5.04228997261648e-07	Pentatricopeptide repeat-containing protein At5g19020%2C mitochondrial
CITRE_008g007500	-0.496838648281216	5.1427309647574e-07	Proteasome assembly chaperone 2
CITRE_001g030150	0.314085585187015	5.14653901449621e-07	CUE domain-containing protein
CITRE_002g023530	-0.996551618783354	5.14788883763057e-07	Homeobox-DDT domain protein RLT3
CITRE_003g042880	-0.3582832303576	5.1755060672813e-07	conserved hypothetical protein
CITRE_003g056420	0.276808608646222	5.19864415791599e-07	Protein COP1 SUPPRESSOR 2
CITRE_004g020240	1.13105685859277	5.31311373933527e-07	Protein DETOXIFICATION
CITRE_003g057100	0.328671081129317	5.3311174035003e-07	putative Conserved oligomeric Golgi complex subunit 4
CITRE_007g002790	-0.384896039113653	5.3733852267741e-07	conserved hypothetical protein
CITRE_003g002400	-0.186587519536737	5.38097610249955e-07	Reticulon-like protein
CITRE_064g000070	0.641652584776785	5.43126650483059e-07	Pentatricopeptide repeat-containing protein At5g13770%2C chloroplastic
CITRE_008g001770	-0.571834942626587	5.43624502236118e-07	putative DUF1279 domain-containing protein
CITRE_006g017360	0.410359475734478	5.4643807845861e-07	Scarecrow-like protein 23
CITRE_006g020980	-0.760484078242465	5.49568074569801e-07	60S ribosomal protein L10a
CITRE_009g017360	1.10027357102447	5.50476842376293e-07	Glycosyltransferase
CITRE_007g027420	1.05975463210612	5.5108003093651e-07	Glycosyltransferase
CITRE_003g052390	-0.544214948946821	5.56160688390974e-07	RING-type domain-containing protein
CITRE_002g008090	0.364847479469099	5.59982764338671e-07	Non-specific serine/threonine protein kinase
CITRE_003g054760	-0.578170887138287	5.69038120374473e-07	conserved hypothetical protein
CITRE_004g001740	-0.3536717524684	5.69532719688496e-07	Nuclear pore complex protein NUP88
CITRE_003g046570	-0.534329234166747	5.83594362998786e-07	Glutamate dehydrogenase 1
CITRE_007g003220	0.614599692996301	5.85601766856135e-07	Tubby-like F-box protein
CITRE_003g052910	0.310906141042235	5.90027886880111e-07	Tubby-like F-box protein 3
CITRE_002g041620	0.450285111415918	5.91608809005617e-07	EF-hand domain-containing protein
CITRE_007g009930	-0.250897526545874	5.99853731720977e-07	PWWP domain-containing protein
CITRE_001g019260	0.357151876212032	6.12481628642261e-07	putative G-type lectin S-receptor-like serine/threonine-protein kinase At4g27290
CITRE_001g004700	-0.379174633037531	6.13298992596762e-07	CRC domain-containing protein
CITRE_002g019890	0.481189017392051	6.20212819189332e-07	PDZ domain-containing protein
CITRE_004g010440	-0.818566019557342	6.20212819189332e-07	Ornithine decarboxylase
CITRE_001g010850	-1.14036575329554	6.20626585337036e-07	Glucan endo-1%2C3-beta-D-glucosidase
CITRE_004g003490	0.491631969960447	6.20778199841071e-07	Reticulon-like protein
CITRE_008g023270	0.243400447279761	6.41697861604596e-07	Vesicle-associated membrane protein 714
CITRE_001g030470	0.967507855570759	6.42132593857015e-07	Arogenate dehydrogenase 1%2C chloroplastic
CITRE_008g007060	0.839946114126406	6.43619083410563e-07	Xanthotoxin 5-hydroxylase CYP82C4
CITRE_001g011760	-0.617473827868003	6.46002967633305e-07	DYW_deaminase domain-containing protein
CITRE_006g009170	-0.606283442890079	6.48937867626662e-07	conserved hypothetical protein
CITRE_002g041430	0.419889703330155	6.54785911414194e-07	putative HTH myb-type domain-containing protein
CITRE_006g020230	0.318235284017977	6.63923933294624e-07	putative Tropinone reductase-like 1
CITRE_004g003960	0.537201868906161	6.64676303817108e-07	zinc_ribbon_12 domain-containing protein
CITRE_008g005720	-0.429205696444147	6.70574673530083e-07	Protein CHROMATIN REMODELING 25
CITRE_002g006270	-0.357236716742734	6.80802030323423e-07	F-box domain-containing protein
CITRE_005g031750	0.367070532181336	6.86015249747354e-07	F-box domain-containing protein
CITRE_005g015410	0.652863110297435	6.8690930046291e-07	conserved hypothetical protein
CITRE_003g051130	-0.467147984041916	6.87113317604398e-07	Selenocysteine methyltransferase
CITRE_001g011330	-0.277265131371914	6.88889031753851e-07	Ribosomal_L28e domain-containing protein
CITRE_002g035310	0.688351434903189	6.98179639356588e-07	NAC domain-containing protein
CITRE_003g002330	-3.56688877330191	7.06442463388851e-07	putative Aluminum-activated malate transporter 9
CITRE_003g004640	-1.23681448901182	7.18585367126024e-07	Response regulatory domain-containing protein
CITRE_006g012920	0.679777489687261	7.20523481502446e-07	conserved hypothetical protein
CITRE_001g008760	0.485734076166771	7.20811039464183e-07	Aldedh domain-containing protein
CITRE_012g000280	3.31484837338792	7.20811039464183e-07	hypothetical protein
CITRE_004g025400	0.776381859658155	7.24083754699754e-07	conserved hypothetical protein
CITRE_002g032680	-0.61970141242967	7.26689080868656e-07	U3 snoRNP-associated protein-like YAO
CITRE_002g000870	-0.425119528794239	7.2710616438133e-07	AMP-binding domain-containing protein
CITRE_001g016000	0.478993393388711	7.27812460009224e-07	PKS_ER domain-containing protein
CITRE_002g039350	0.744616762748857	7.2865532960399e-07	conserved hypothetical protein
CITRE_002g013330	-0.706473488271297	7.4020369586252e-07	conserved hypothetical protein
CITRE_004g019280	0.653692401914124	7.43974917466945e-07	X8 domain-containing protein
CITRE_003g051180	-1.23748933036049	7.48111016450333e-07	IPPc domain-containing protein
CITRE_009g003630	0.525609941978345	7.51203176744592e-07	conserved hypothetical protein
CITRE_007g013360	-0.357688284261785	7.65909611557402e-07	Homeobox-leucine zipper protein ATHB-15
CITRE_002g029030	-0.323471085377129	7.67513456964566e-07	conserved hypothetical protein
CITRE_009g009480	0.891451924395692	7.69286101068344e-07	Hypothetical protein
CITRE_008g001620	-0.203759019913362	7.71251308279846e-07	Importin N-terminal domain-containing protein
CITRE_009g001440	0.362875778002908	7.71251308279846e-07	HYPK_UBA domain-containing protein
CITRE_009g004990	0.635749647084681	7.71251308279846e-07	Mitogen-activated protein kinase
CITRE_005g023430	0.814452892264634	7.71668291434892e-07	Pentatricopeptide repeat-containing protein At3g05340
CITRE_004g023740	0.811767440596348	7.73495904959131e-07	J domain-containing protein
CITRE_005g004690	0.372705316691631	7.75209014725785e-07	Bromo domain-containing protein
CITRE_001g033700	0.25347081179803	7.75282249605259e-07	conserved hypothetical protein
CITRE_001g026920	-0.551481459809764	7.80407824369871e-07	Heat shock cognate protein 80
CITRE_006g006000	0.472108228683272	7.85954993314385e-07	conserved hypothetical protein
CITRE_004g010730	0.366176085139444	7.89337854362806e-07	XS domain-containing protein
CITRE_007g027430	0.41116580423421	7.89337854362806e-07	conserved hypothetical protein
CITRE_004g033430	0.415183282803319	7.91124765344937e-07	Protein-serine/threonine phosphatase
CITRE_003g018350	-1.00635907126754	7.93185035774915e-07	putative protein phosphatase 2C 73
CITRE_004g022700	-0.320877220486488	7.93185035774915e-07	conserved hypothetical protein
CITRE_004g001500	-0.464139159463629	7.99232997881325e-07	WIYLD domain-containing protein
CITRE_003g062940	-0.305689229979011	8.00283668893986e-07	conserved hypothetical protein
CITRE_003g057680	0.334636055797241	8.00864735735068e-07	conserved hypothetical protein
CITRE_004g021320	-1.61788341514929	8.09589247161026e-07	YqaJ domain-containing protein
CITRE_004g023830	0.279244087964709	8.09589247161026e-07	putative Pentatricopeptide repeat-containing protein At5g08305
CITRE_006g017240	-0.268555470609778	8.10294361666929e-07	conserved hypothetical protein
CITRE_001g021680	-0.632979715822403	8.11236508642039e-07	putative POLAc domain-containing protein
CITRE_002g024640	-0.318829654652394	8.21514956219397e-07	conserved hypothetical protein
CITRE_002g020830	0.880955205741972	8.24629512035106e-07	conserved hypothetical protein
CITRE_003g054610	-0.695464215568931	8.53952484186114e-07	conserved hypothetical protein
CITRE_006g008660	-1.30957584966261	8.5464442884469e-07	L-ascorbate peroxidase
CITRE_002g023480	-0.298230762498383	8.65850959975926e-07	conserved hypothetical protein
CITRE_002g033570	0.488921705421162	8.67304488827554e-07	Tobamovirus multiplication protein 1
CITRE_001g031980	1.02165780825377	8.67943770244213e-07	Pentatricopeptide repeat-containing protein At2g34400
CITRE_003g001090	-0.314139113968307	8.71749122809624e-07	RNA helicase
CITRE_266g000020	0.442252656065277	8.79000801639971e-07	FLZ-type domain-containing protein
CITRE_002g022510	0.653453381567859	8.84001030747003e-07	Nuclear factor Y%2C subunit B3
CITRE_002g028550	0.206385065822307	8.84001030747003e-07	Chaperone protein dnaJ 15
CITRE_008g023470	0.294605347071564	8.93738028752807e-07	CN hydrolase domain-containing protein
CITRE_003g062440	-0.256448527828656	9.01979193725984e-07	Protein kinase domain-containing protein
CITRE_003g010270	-0.849697827081333	9.04074184089745e-07	PMEI domain-containing protein
CITRE_005g028120	0.493395744460567	9.04989181748557e-07	ZF-HD dimerization-type domain-containing protein
CITRE_007g026010	1.44019891483243	9.10974390332369e-07	putative NAC domain-containing protein 2
CITRE_002g020690	0.362170398362619	9.14859035269119e-07	putative tRNase Z TRZ1
CITRE_003g057960	0.365325949967587	9.20572931603468e-07	UV-stimulated scaffold protein A
CITRE_001g006220	1.04831288725663	9.22324506167591e-07	hypothetical protein
CITRE_001g015540	-0.271293929029718	9.22324506167591e-07	60S ribosomal protein L13-1
CITRE_001g016950	0.400893544981387	9.26250391830887e-07	Proton pump-interactor 1
CITRE_005g026840	0.447839363008601	9.26250391830887e-07	conserved hypothetical protein
CITRE_008g032660	0.680508866826209	9.26921978095817e-07	Metallophos domain-containing protein
CITRE_002g010980	-0.569835709726135	9.30881826524405e-07	conserved hypothetical protein
CITRE_002g003730	-0.507453437144783	9.36020974978345e-07	Protein kinase domain-containing protein
CITRE_003g037780	-0.608363885726894	9.36020974978345e-07	putative disease resistance protein At3g14460
CITRE_005g027700	0.383581234076418	9.3744256097161e-07	conserved hypothetical protein
CITRE_004g001800	1.10582037645065	9.67891844846683e-07	Elf4 domain-containing protein
CITRE_004g024510	-0.542892546705357	9.69331284940341e-07	Dihydrolipoamide acetyltransferase component of pyruvate dehydrogenase complex
CITRE_003g028070	-0.302872723406339	9.8376601111976e-07	Succinate--CoA ligase [ADP-forming] subunit alpha%2C mitochondrial
CITRE_004g029490	-0.337118018267535	9.86656210275421e-07	Nucleotid_trans domain-containing protein
CITRE_007g020480	0.636677084689938	9.92019177006306e-07	Non-specific serine/threonine protein kinase
CITRE_003g002120	-0.315552759777158	9.98867661964851e-07	Glucose-6-phosphate 1-epimerase
CITRE_003g027320	-0.304247276321439	9.98867661964851e-07	UTP--glucose-1-phosphate uridylyltransferase
CITRE_006g006640	-0.810933702770494	1.00462388439603e-06	Glycosyltransferase
CITRE_004g035140	0.425793073731795	1.00593212356347e-06	Homeobox domain-containing protein
CITRE_004g006560	0.283563102074654	1.01225304021106e-06	EF-hand domain-containing protein
CITRE_008g022060	-0.762711761857565	1.01225304021106e-06	Homeobox domain-containing protein
CITRE_007g001250	0.978142033041063	1.05865924467455e-06	Pentatricopeptide repeat-containing protein At3g51320
CITRE_002g019130	0.861334317806974	1.06408256709934e-06	B box-type domain-containing protein
CITRE_001g007270	0.609073889898143	1.07358496924811e-06	Beta-glucuronosyltransferase GlcAT14B
CITRE_002g011560	-0.535404843674693	1.07859279019378e-06	Glyceraldehyde-3-phosphate dehydrogenase
CITRE_003g010490	0.707270205850147	1.07978836343023e-06	conserved hypothetical protein
CITRE_011g001450	-0.473028837229842	1.08318765145843e-06	putative Prolycopene isomerase%2C chloroplastic
CITRE_003g062710	0.406372291651857	1.09123045530031e-06	conserved hypothetical protein
CITRE_005g008080	0.24366001692532	1.09123045530031e-06	Membralin-like protein At1g60995
CITRE_009g021470	-0.555629050920976	1.09123045530031e-06	Cyclopropane synthase isoform 1
CITRE_002g033500	-0.364517103234455	1.09638999137237e-06	conserved hypothetical protein
CITRE_006g017280	0.774048062094753	1.11695067989468e-06	putative Pentatricopeptide repeat-containing protein At4g02750
CITRE_004g024130	0.292752104201301	1.13083321782436e-06	Myosin-1
CITRE_003g021220	0.741884654907331	1.13931348923135e-06	Pentatricopeptide repeat-containing protein At3g14580%2C mitochondrial
CITRE_009g003310	-0.363862434096079	1.13931348923135e-06	Kinesin-like protein
CITRE_002g035730	0.313863679978862	1.13971523776777e-06	Thioredoxin domain-containing protein
CITRE_009g030330	0.523110621106729	1.14745531244795e-06	Protein SAR DEFICIENT 4
CITRE_003g044100	0.806363740726764	1.15705112755384e-06	Glycosyltransferase
CITRE_001g022440	-0.881590025523422	1.15949133078761e-06	putative protein FATTY ACID EXPORT 5
CITRE_001g030780	0.899458947039055	1.16101266351185e-06	MFS domain-containing protein
CITRE_003g060310	0.353320592763943	1.16297130615703e-06	Non-specific serine/threonine protein kinase
CITRE_069g000080	-0.575955310665789	1.16705149565274e-06	conserved hypothetical protein
CITRE_009g003240	0.269745543693292	1.16874610034601e-06	Translationally-controlled tumor protein
CITRE_002g037520	0.760352164885106	1.17615588938379e-06	Non-specific serine/threonine protein kinase
CITRE_003g031360	-0.32485540619554	1.18321655859793e-06	Non-lysosomal glucosylceramidase
CITRE_004g025170	0.626661406269823	1.18424070933329e-06	ABC transporter domain-containing protein
CITRE_009g006360	0.380997988072917	1.20115556712628e-06	FRIGIDA-like protein
CITRE_008g027690	0.545370920430049	1.21073288870382e-06	Isovaleryl-CoA dehydrogenase%2C mitochondrial
CITRE_005g039550	-0.419119177138095	1.22122519982109e-06	Ubiquitin-like domain-containing protein
CITRE_009g014490	0.210074839576358	1.22641212272559e-06	Vesicle-associated membrane protein 721
CITRE_002g039550	-0.384659291288599	1.23099759340789e-06	Pentatricopeptide repeat-containing protein At1g11710%2C mitochondrial
CITRE_001g002020	-0.47554438966315	1.24009435146142e-06	PPPDE domain-containing protein
CITRE_003g042270	0.322683551715715	1.24544677866146e-06	putative Electron transfer flavoprotein-ubiquinone oxidoreductase%2C mitochondrial
CITRE_004g001420	0.712181366620448	1.24544677866146e-06	conserved hypothetical protein
CITRE_008g002510	-0.502606359560211	1.2619023290655e-06	Peptide-methionine (R)-S-oxide reductase
CITRE_009g023710	-0.387317193093571	1.26879420307495e-06	Galactinol--sucrose galactosyltransferase
CITRE_005g031700	-0.580729311359449	1.27804960943554e-06	conserved hypothetical protein
CITRE_004g018220	-0.789803984760812	1.28639942162531e-06	BTB domain-containing protein
CITRE_003g016070	0.992069032021775	1.29256228701662e-06	conserved hypothetical protein
CITRE_004g029020	-0.483855549109155	1.29256228701662e-06	putative Alpha-galactosidase
CITRE_004g000050	0.449509403057067	1.29739382532662e-06	conserved hypothetical protein
CITRE_008g020950	0.733278528747599	1.30384101224683e-06	Hypothetical protein
CITRE_004g022500	0.826481701064622	1.31508699330596e-06	conserved hypothetical protein
CITRE_002g035960	0.983704104908618	1.31572098779721e-06	Protein kinase domain-containing protein
CITRE_004g029340	0.360343492090219	1.33094294412996e-06	Ribose-phosphate pyrophosphokinase 3%2C chloroplastic
CITRE_001g028700	0.358415890884064	1.34317673516683e-06	SAC domain-containing protein
CITRE_001g030140	-0.770875109895187	1.35764309163272e-06	Protein kinase domain-containing protein
CITRE_006g020560	0.215193870196072	1.36077934711948e-06	PX domain-containing protein
CITRE_009g016780	0.297017430211683	1.36455088640841e-06	UBA domain-containing protein
CITRE_005g034800	-0.472634334246782	1.37433794817933e-06	D-3-phosphoglycerate dehydrogenase
CITRE_005g036600	-0.395480121211675	1.37474585684992e-06	Methyltransferase-like protein 2
CITRE_001g001510	-0.55968201401768	1.37863489562211e-06	putative folate-biopterin transporter 2
CITRE_003g046640	-0.246238910453943	1.37863489562211e-06	conserved hypothetical protein
CITRE_003g009270	-0.297144929936494	1.38234005767217e-06	Phosphatidylserine decarboxylase proenzyme 1%2C mitochondrial
CITRE_009g028530	0.46033547776245	1.38924861352125e-06	Zinc finger CCCH domain-containing protein 48
CITRE_008g032840	0.839094179379573	1.3938582748975e-06	Hypothetical protein
CITRE_004g034550	0.644127658786755	1.40665827157316e-06	conserved hypothetical protein
CITRE_005g001400	0.625152312012542	1.40665827157316e-06	conserved hypothetical protein
CITRE_005g025740	1.08754633225677	1.40665827157316e-06	Stearoyl-[acyl-carrier-protein] 9-desaturase
CITRE_005g039140	0.467380124936438	1.40665827157316e-06	Alba domain-containing protein
CITRE_005g039930	0.449017204868431	1.40665827157316e-06	N-acetylglucosaminylphosphatidylinositol deacetylase
CITRE_005g040560	0.457993595874263	1.41811675094833e-06	conserved hypothetical protein
CITRE_159g000080	0.541742995613179	1.41811675094833e-06	Abhydrolase_3 domain-containing protein
CITRE_003g025340	0.752667827020326	1.42129979656691e-06	RRM domain-containing protein
CITRE_004g014750	0.237885515678417	1.4254918885675e-06	Tobamovirus multiplication protein 2A
CITRE_006g012650	-0.298856848142234	1.43950317254204e-06	conserved hypothetical protein
CITRE_004g033680	-0.716540090947124	1.44172808744283e-06	putative Polyadenylate-binding protein-interacting protein 2
CITRE_009g020610	-0.302528534550633	1.44716807565146e-06	40S ribosomal protein S6
CITRE_003g035050	0.625058430655514	1.45756324289301e-06	putative Disease resistance protein RPV1
CITRE_009g006390	-0.689586397767752	1.47081190680523e-06	Ferredoxin
CITRE_004g025890	-0.292187066663111	1.47401707622638e-06	1-phosphatidylinositol 4-kinase
CITRE_003g004810	0.351160966960925	1.47704560145751e-06	putative Calmodulin-binding protein 60 A
CITRE_006g004570	-0.251095698732789	1.47704560145751e-06	Protein LUTEIN DEFICIENT 5%2C chloroplastic
CITRE_001g004570	-0.377542528435143	1.48341355721541e-06	putative Transcription factor MYB3R-4
CITRE_003g049870	1.18554381030091	1.48972227578922e-06	ERF
CITRE_002g021650	-1.12832644182215	1.50702449339054e-06	putative Heat shock protein 90-6%2C mitochondrial
CITRE_003g015410	-0.537916229384118	1.51394072576758e-06	Peptidase A1 domain-containing protein
CITRE_003g058970	0.536500560782925	1.52210688167544e-06	Pentatricopeptide repeat-containing protein At5g28460
CITRE_003g003140	-1.13506086186969	1.53222957717888e-06	GMP synthase (glutamine-hydrolyzing)
CITRE_004g022390	-1.74639424872095	1.53377950949121e-06	Carotenoid cleavage dioxygenase 4a
CITRE_007g001190	0.395340696175772	1.57474098864094e-06	conserved hypothetical protein
CITRE_007g027150	0.899756068943815	1.59188761561039e-06	Pentatricopeptide repeat-containing protein At2g13600
CITRE_005g027800	0.428991934182066	1.59818521165858e-06	J domain-containing protein
CITRE_002g028870	0.471692677050606	1.60546230886262e-06	conserved hypothetical protein
CITRE_003g055190	-0.406409933779181	1.60688041668181e-06	ATP-dependent Clp protease proteolytic subunit
CITRE_006g018650	0.254552611009076	1.61162787962019e-06	Calcium load-activated calcium channel
CITRE_007g000210	-0.577716304223173	1.63069521658894e-06	Mitochondrial phosphate carrier protein 1%2C mitochondrial
CITRE_006g009830	-1.42292467362331	1.63226058600498e-06	WAT1-related protein
CITRE_003g062530	0.419115879291969	1.67301331935496e-06	conserved hypothetical protein
CITRE_007g008280	0.388436471913827	1.67792823769376e-06	O-fucosyltransferase family protein
CITRE_004g033940	0.392157955403459	1.74923177899242e-06	Protein kinase domain-containing protein
CITRE_008g000220	0.337373468209368	1.7590814062763e-06	Calcium-dependent protein kinase 4
CITRE_003g003860	0.437662217624965	1.78195946947066e-06	Aldedh domain-containing protein
CITRE_008g009870	0.263752770727617	1.7860582985494e-06	V-type proton ATPase subunit a
CITRE_006g015100	-0.54509097222334	1.78839912160061e-06	Hypothetical protein
CITRE_003g026000	-0.375339858868285	1.79364461703351e-06	PHB domain-containing protein
CITRE_004g001890	0.299705773816957	1.79579904906222e-06	Protein kinase domain-containing protein
CITRE_009g007140	-0.945083904964137	1.80346717545404e-06	STAS domain-containing protein
CITRE_005g001410	0.404938442166414	1.81015862096111e-06	putative C3H1-type domain-containing protein
CITRE_006g021580	0.356736657777627	1.81015862096111e-06	RAB6-interacting golgin
CITRE_009g000380	0.242020908456429	1.81015862096111e-06	t-SNARE coiled-coil domain-containing protein
CITRE_003g009100	0.599667899214288	1.82216397329406e-06	Transcription factor KUA1
CITRE_009g015270	-0.462122522754541	1.82216397329406e-06	AUGMIN subunit 3
CITRE_122g000020	0.291999682045175	1.82510120386374e-06	Serine/threonine protein phosphatase 2A regulatory subunit
CITRE_003g050520	-0.887391421880196	1.82997513221344e-06	Auxin-responsive protein
CITRE_001g000410	0.417363208703525	1.85811360847952e-06	conserved hypothetical protein
CITRE_003g006990	-0.484307427924373	1.87213072662186e-06	putative Lysine-specific demethylase REF6
CITRE_006g029200	0.404687060579843	1.88101839416952e-06	putative Glyco_transf_5 domain-containing protein
CITRE_007g012330	1.13855148781975	1.89104135719665e-06	GDSL esterase/lipase 1
CITRE_001g000450	0.18838007257042	1.8923266707369e-06	conserved hypothetical protein
CITRE_006g030300	0.689351247970355	1.89391766525827e-06	conserved hypothetical protein
CITRE_003g048850	0.430646878300463	1.90948001644421e-06	UDENN domain-containing protein
CITRE_003g005410	-0.546130456801953	1.91309999119567e-06	conserved hypothetical protein
CITRE_005g000990	0.567605279342448	1.91309999119567e-06	ZF-HD dimerization-type domain-containing protein
CITRE_004g034220	0.301116180458463	1.93695293136557e-06	BHLH domain-containing protein
CITRE_009g004540	-0.332874603126114	1.94316082203797e-06	SpoU_methylase domain-containing protein
CITRE_003g049290	-0.483554642858253	1.95361140714314e-06	Phospholipid--sterol O-acyltransferase
CITRE_008g001360	-0.287240027899481	1.95433111308466e-06	F-box/LRR-repeat protein 10
CITRE_001g026830	0.206110849953581	1.96191750221702e-06	conserved hypothetical protein
CITRE_005g014850	0.312914695895097	1.96349169866598e-06	Secretory carrier-associated membrane protein 4
CITRE_003g019150	0.511872716097793	1.9736484849737e-06	DUF641 domain-containing protein
CITRE_009g027830	-0.342908795783065	1.98922401559594e-06	putative Cysteine and histidine-rich domain-containing protein RAR1
CITRE_001g006760	-0.581754390622635	2.031966774107e-06	conserved hypothetical protein
CITRE_003g056160	-0.279757437918569	2.0335914268168e-06	Proline--tRNA ligase
CITRE_007g001240	0.455631740929914	2.05296265563307e-06	conserved hypothetical protein
CITRE_004g031960	-0.739056613435834	2.07124615199818e-06	conserved hypothetical protein
CITRE_005g028380	0.884834691062044	2.08154896584603e-06	RING-type domain-containing protein
CITRE_007g009360	0.998842642124014	2.09014335654883e-06	putative pentatricopeptide repeat-containing protein At5g08490
CITRE_004g035240	1.13770969630329	2.09708276735718e-06	RING-type domain-containing protein
CITRE_003g020740	1.22742807395901	2.11701224105605e-06	Protein kinase domain-containing protein
CITRE_003g042280	0.3784534251731	2.11983678352458e-06	Electron transfer flavoprotein-ubiquinone oxidoreductase
CITRE_003g060590	0.336355051508628	2.12116733625599e-06	ATPase
CITRE_002g036790	1.50282016717468	2.12393312445248e-06	AP2/ERF domain-containing protein
CITRE_001g030980	0.274616923725206	2.15881843625665e-06	Protein kinase domain-containing protein
CITRE_009g031100	1.16221902984246	2.16877808253283e-06	conserved hypothetical protein
CITRE_009g030350	0.513880805716977	2.17148750174203e-06	Pentatricopeptide repeat-containing protein At4g21190
CITRE_001g028260	0.532201954685454	2.19325156991673e-06	Hypothetical protein
CITRE_008g022710	-0.815178618231168	2.1960047708676e-06	conserved hypothetical protein
CITRE_009g007050	0.363320980756819	2.1960047708676e-06	Chlorophyllase
CITRE_005g031710	-0.533945251261549	2.2012012091039e-06	2-oxoisovalerate dehydrogenase subunit alpha 1%2C mitochondrial
CITRE_003g059720	0.47894664646731	2.22889475187243e-06	Cyclic nucleotide-binding domain-containing protein
CITRE_004g034610	-0.326878442137459	2.22889475187243e-06	Actin-related protein 7
CITRE_009g014320	0.532646101891776	2.24591243274775e-06	3-ketoacyl-CoA thiolase 2%2C peroxisomal
CITRE_005g026180	0.368204913761257	2.27648066217132e-06	Adenine phosphoribosyltransferase
CITRE_009g031350	1.06727668272027	2.2835826914756e-06	Trehalose 6-phosphate phosphatase
CITRE_001g024950	0.617071414834965	2.32638736565585e-06	SWIB domain-containing protein
CITRE_004g018980	0.427975500203885	2.33083289938624e-06	RWP-RK domain-containing protein
CITRE_004g011950	-1.37255997064507	2.33124659680673e-06	Str_synth domain-containing protein
CITRE_003g047190	-0.418205366831825	2.3469204000311e-06	conserved hypothetical protein
CITRE_011g001400	-0.518684040800685	2.35204130914581e-06	putative Prolycopene isomerase%2C chloroplastic
CITRE_003g059480	-0.420096091955978	2.35666495950689e-06	AAA_16 domain-containing protein
CITRE_007g010100	0.607698262821617	2.3590771227439e-06	Inorganic pyrophosphatase 1
CITRE_004g017960	-0.489692678662437	2.35934274736411e-06	Protein ORANGE-GREEN%2C chloroplastic
CITRE_006g014740	-0.926813477386361	2.36407013098358e-06	conserved hypothetical protein
CITRE_005g035450	-0.430782360732567	2.36488732664565e-06	Chlorophyll a-b binding protein%2C chloroplastic
CITRE_003g021980	1.82198583836419	2.38133989886503e-06	putative Extensin-3
CITRE_005g030490	-0.763170262545342	2.38829096145577e-06	Sister chromatid cohesion protein PDS5
CITRE_001g020940	0.277063498470701	2.39692302893656e-06	Polycomb group protein FIE1
CITRE_001g032430	-0.438821268574617	2.40813749084067e-06	Sm protein F
CITRE_005g040070	0.643952712989027	2.43753269774811e-06	putative Homeobox domain-containing protein
CITRE_004g030170	0.271581301238115	2.44582424437019e-06	putative ULP_PROTEASE domain-containing protein
CITRE_005g031350	-0.274631261727756	2.46873321092269e-06	conserved hypothetical protein
CITRE_005g026410	0.64690050050675	2.51807016346725e-06	conserved hypothetical protein
CITRE_008g011980	0.381578498721	2.52655103886701e-06	Eukaryotic translation initiation factor 4B3
CITRE_009g023290	-0.738519165956201	2.52849978360381e-06	putative LRR receptor-like serine/threonine-protein kinase At3g47570
CITRE_003g051320	0.455158528263366	2.5290600686786e-06	FLZ-type domain-containing protein
CITRE_005g032330	-0.771328173703828	2.53623209426494e-06	GLTP domain-containing protein
CITRE_008g001940	0.633731343970505	2.55790223513717e-06	CAF1C_H4-bd domain-containing protein
CITRE_005g039960	-0.592313064709375	2.60516085447437e-06	Catalase
CITRE_002g034620	0.46337649863801	2.62382784754016e-06	B box-type domain-containing protein
CITRE_008g014980	-0.49978195658968	2.64199260067755e-06	3-hydroxyacyl-[acyl-carrier-protein] dehydratase
CITRE_004g020140	0.327533110886255	2.64606152425783e-06	Presenilin-like protein At1g08700
CITRE_007g008870	-0.280578988831623	2.64618117614571e-06	Histone H3.3
CITRE_003g059850	0.353921788291299	2.66339622647844e-06	AT-hook motif nuclear-localized protein
CITRE_007g029990	-0.708283778307961	2.66339622647844e-06	conserved hypothetical protein
CITRE_004g031060	0.349562373859988	2.66424168797358e-06	5-formyltetrahydrofolate cyclo-ligase%2C mitochondrial
CITRE_009g029700	-0.397333216327537	2.66880698511171e-06	conserved hypothetical protein
CITRE_006g019900	-1.35818249115195	2.67801740378371e-06	Exocyst subunit Exo70 family protein
CITRE_001g021290	-1.63545370493987	2.68235923235184e-06	putative Receptor-like protein EIX1
CITRE_007g013920	1.19871201798794	2.68499841592008e-06	DYW_deaminase domain-containing protein
CITRE_003g057300	0.516563507891064	2.68703219359241e-06	3-ketoacyl-CoA synthase
CITRE_007g004280	-0.479997596639191	2.69988814720004e-06	conserved hypothetical protein
CITRE_009g032190	-0.50695907426768	2.7033141528994e-06	Phosphoglycerate kinase%2C chloroplastic
CITRE_004g001370	0.226306881181917	2.71443260419517e-06	Aquaporin PIP1-2
CITRE_009g031080	1.37275354965573	2.72294702318014e-06	conserved hypothetical protein
CITRE_004g024310	-1.23545238080851	2.73400001623542e-06	Peptidase A1 domain-containing protein
CITRE_007g029060	-0.827940734959205	2.75778711119808e-06	RING-type E3 ubiquitin transferase
CITRE_005g002490	-0.367417761497269	2.76001602500569e-06	conserved hypothetical protein
CITRE_005g039810	-0.36662643618563	2.76001602500569e-06	Bms1-type G domain-containing protein
CITRE_006g030250	0.628157425263955	2.76001602500569e-06	FCP1 domain-containing protein
CITRE_006g029820	0.982491239627201	2.76933513238742e-06	Pentatricopeptide repeat-containing protein At3g29230
CITRE_008g029000	0.459598167219426	2.76933513238742e-06	UDP-galactose/UDP-glucose transporter 5B
CITRE_008g009750	0.394573041248217	2.78677933101656e-06	Chromatin remodeling protein SHL
CITRE_001g005810	0.271442216639046	2.79168947299253e-06	conserved hypothetical protein
CITRE_007g007630	-0.317987207504204	2.79168947299253e-06	Protein RMD5
CITRE_005g029520	1.89917040321751	2.8007198934557e-06	conserved hypothetical protein
CITRE_009g011910	0.458247017292187	2.80530775821626e-06	conserved hypothetical protein
CITRE_001g002790	-0.593101693158132	2.82058969689115e-06	Receptor-like serine/threonine-protein kinase
CITRE_002g011180	-0.248478607587088	2.85128361163457e-06	60S ribosomal protein L11
CITRE_004g025550	-0.546548713914226	2.89108628963574e-06	Serotonin N-acetyltransferase 2%2C chloroplastic
CITRE_005g013020	0.532780538964948	2.89565395493596e-06	Fucosyltransferase
CITRE_002g030830	0.809227123473167	2.91963277170018e-06	conserved hypothetical protein
CITRE_003g055060	-0.504344901257614	2.93966302297293e-06	CP12 domain-containing protein
CITRE_009g015580	-0.82231647809506	2.94075773784061e-06	Protein arginine methyltransferase NDUFAF7
CITRE_142g000040	-0.354971067607177	2.96137368861963e-06	SIT4 phosphatase-associated protein family
CITRE_004g014800	0.463642400081345	2.96391746994441e-06	Two-component response regulator-like APRR2
CITRE_007g020190	1.19313520850321	3.01869423399083e-06	Hypothetical protein
CITRE_009g027530	0.931356873211805	3.02615171218844e-06	putative 7-ethoxycoumarin O-deethylase
CITRE_004g033280	0.779672315746508	3.02710573261124e-06	conserved hypothetical protein
CITRE_007g026020	1.54326058462603	3.03195224375877e-06	putative NAC domain-containing protein 48
CITRE_008g012460	0.788130428271874	3.03979109070475e-06	GTD-binding domain-containing protein
CITRE_002g000560	1.09702525275724	3.06519220913049e-06	putative Pentatricopeptide repeat-containing protein At2g26790%2C mitochondrial
CITRE_005g033990	0.36708172128866	3.09836381134714e-06	conserved hypothetical protein
CITRE_003g044630	0.566792531548783	3.10125570485255e-06	putative Phosphoenolpyruvate carboxykinase (ATP)
CITRE_006g024210	0.245541819818841	3.107914101306e-06	putative Phenylalanine--tRNA ligase%2C chloroplastic/mitochondrial
CITRE_004g025980	-0.586678170307914	3.14016703773867e-06	D-aminoacyl-tRNA deacylase
CITRE_008g032620	0.413265268145888	3.15477697016218e-06	putative S-adenosylmethionine carrier 2%2C chloroplastic
CITRE_002g015490	0.272998491572892	3.17577404172271e-06	conserved hypothetical protein
CITRE_004g026310	0.670707372188347	3.19262599975349e-06	putative RRM domain-containing protein
CITRE_003g012350	0.939085393796599	3.25277493282944e-06	Pentatricopeptide repeat-containing protein At5g61400
CITRE_004g023650	-0.58963619580391	3.25277493282944e-06	Hydroxymethylbilane synthase
CITRE_006g011880	0.264274374012376	3.28637583049858e-06	PRA1 family protein
CITRE_005g035640	-0.344140352918118	3.32584360172493e-06	conserved hypothetical protein
CITRE_003g060410	0.456524516489834	3.34876108805202e-06	putative F-box protein At4g00755
CITRE_004g013800	0.368673462330233	3.34876108805202e-06	conserved hypothetical protein
CITRE_003g062780	0.554116923557253	3.35482633724782e-06	FLZ-type domain-containing protein
CITRE_003g001300	0.911496951641551	3.37008354641548e-06	DCD domain-containing protein
CITRE_005g026990	0.462287405150928	3.37008354641548e-06	Protein kinase domain-containing protein
CITRE_001g019190	0.895753597387307	3.38027973105062e-06	putative Receptor-like serine/threonine-protein kinase SD1-8
CITRE_003g048040	-0.608021431680143	3.39595582395173e-06	putative BSD domain-containing protein
CITRE_006g017430	0.553460173430087	3.40001349453517e-06	Protein FAR1-RELATED SEQUENCE
CITRE_008g009190	-1.30324632701551	3.40873923308585e-06	AAA domain-containing protein
CITRE_002g036200	0.572823277013365	3.41395510806389e-06	conserved hypothetical protein
CITRE_001g024380	-0.288526725000294	3.44416873758802e-06	Bromo domain-containing protein
CITRE_007g030020	0.673228998015985	3.45165468313091e-06	conserved hypothetical protein
CITRE_004g001950	0.978084368969381	3.45967997480176e-06	Phosphoribosylanthranilate isomerase
CITRE_004g032810	1.20826236388977	3.4869938374343e-06	putative Xylan glycosyltransferase MUCI21
CITRE_009g017320	-0.913241008654326	3.4869938374343e-06	Protein kinase domain-containing protein
CITRE_003g056640	-0.235787373823103	3.53080188968489e-06	Translocase of chloroplast
CITRE_004g030850	0.275983560806368	3.53080188968489e-06	MYND-type domain-containing protein
CITRE_001g024490	-0.256891210784375	3.5510381226565e-06	Rab3 GTPase-activating protein catalytic subunit
CITRE_003g060810	0.336608850388838	3.5566139599654e-06	Calcium-dependent lipid-binding protein
CITRE_001g024440	-0.595838615591434	3.56302785163099e-06	putative GDSL esterase/lipase At5g55050
CITRE_005g027600	0.297626064701045	3.57938418737597e-06	conserved hypothetical protein
CITRE_008g022560	-0.483578569189307	3.58427663364907e-06	Poly(A)-specific ribonuclease
CITRE_002g036410	-0.800624529653698	3.5860656206055e-06	putative protein NUCLEAR FUSION DEFECTIVE 6%2C mitochondrial
CITRE_007g004470	-0.258962997003631	3.5860656206055e-06	Extra-large guanine nucleotide-binding protein 1
CITRE_002g011950	-0.400330760290071	3.63301590391652e-06	DUF1985 domain-containing protein
CITRE_005g024680	-0.557041344907856	3.63751599408421e-06	Topless-related protein 3
CITRE_002g035780	-0.636038613708446	3.64648478575375e-06	RING-type E3 ubiquitin transferase
CITRE_007g014420	0.555545120000124	3.66130234204039e-06	Receptor-like serine/threonine-protein kinase
CITRE_004g012260	-0.376066874223057	3.72439661398141e-06	Nudix hydrolase domain-containing protein
CITRE_003g052320	-0.753585961659568	3.72942500941825e-06	putative Auxin-binding protein T92
CITRE_007g003470	0.561033626974456	3.72942500941825e-06	Hypothetical protein
CITRE_009g030450	-0.525067222443413	3.72942500941825e-06	putative NADH dehydrogenase [ubiquinone] 1 alpha subcomplex subunit 5%2C mitochondrial
CITRE_003g043780	0.454864046295618	3.73738001691161e-06	putative BHLH domain-containing protein
CITRE_003g011410	0.659701486207326	3.76507615909548e-06	UDP-galactose/UDP-glucose transporter 2
CITRE_009g015490	-0.808766303776917	3.7797931125689e-06	conserved hypothetical protein
CITRE_006g026990	0.551083959903077	3.78236454505688e-06	UDP-arabinopyranose mutase
CITRE_008g006530	-0.32748083116875	3.78532698014463e-06	Semialdhyde_dh domain-containing protein
CITRE_008g008440	-1.04035893390514	3.79379649503905e-06	conserved hypothetical protein
CITRE_002g041440	0.383261833870557	3.81938255931363e-06	putative snRNA-activating protein complex subunit
CITRE_001g033690	0.621849938716801	3.83083168853562e-06	Epimerase domain-containing protein
CITRE_005g031690	0.550573496863323	3.84138802389291e-06	Pentatricopeptide repeat-containing protein At1g43980%2C mitochondrial
CITRE_009g003380	0.397877972701326	3.85430625859112e-06	AIG1-type G domain-containing protein
CITRE_002g022730	0.57953014033014	3.86607715671771e-06	Hypothetical protein
CITRE_002g025730	0.488168239548962	3.8924009805518e-06	Procollagen-proline 3-dioxygenase
CITRE_006g020550	0.821370903947904	3.95236309623391e-06	conserved hypothetical protein
CITRE_003g037940	1.66520153935379	3.97637258759729e-06	Malonyl-CoA:anthocyanidin 5-O-glucoside-6''-O-malonyltransferase
CITRE_007g004040	0.532680933220224	4.00467555769856e-06	PPR_long domain-containing protein
CITRE_006g027000	-0.363007733986197	4.02851628683461e-06	tRNA (guanine(26)-N(2))-dimethyltransferase
CITRE_005g026940	0.230483275535309	4.0367451357058e-06	putative DUF676 domain-containing protein
CITRE_004g008200	0.355069029780455	4.05587681577547e-06	RING-type E3 ubiquitin transferase
CITRE_004g016780	0.619074165639537	4.05776662199721e-06	BHLH domain-containing protein
CITRE_008g009910	0.517117711557633	4.1001490454861e-06	conserved hypothetical protein
CITRE_001g000520	0.539906554801189	4.10886033959454e-06	putative Cryptochrome DASH
CITRE_002g037080	0.839208478228311	4.13505720079571e-06	Pentatricopeptide repeat-containing protein At1g28690%2C mitochondrial
CITRE_003g040930	-0.293735757031486	4.16274400753946e-06	DNA-directed RNA polymerase subunit beta
CITRE_006g021670	-0.217966705115797	4.18204352956648e-06	Fructose-bisphosphate aldolase
CITRE_001g031940	0.322153824667928	4.18730392079508e-06	Pentatricopeptide repeat-containing protein At5g57250%2C mitochondrial
CITRE_002g033490	0.350202488780245	4.18730392079508e-06	Polyadenylate-binding protein RBP45
CITRE_001g001810	0.245508122452631	4.20060868746951e-06	Non-specific serine/threonine protein kinase
CITRE_003g044850	0.436461635261653	4.20414152269863e-06	conserved hypothetical protein
CITRE_002g014680	0.262834537972126	4.22561140072892e-06	Abhydrolase_3 domain-containing protein
CITRE_002g012800	0.758013220701228	4.23346976386719e-06	Chromosome_seg domain-containing protein
CITRE_003g010210	-0.579081411456788	4.26823776926117e-06	Hsp70-Hsp90 organizing protein 3
CITRE_003g062520	0.319632793558468	4.26823776926117e-06	putative protein mago nashi
CITRE_009g022600	1.06913132670253	4.27367785130339e-06	Bifunctional bis(5'-adenosyl)-triphosphatase/adenylylsulfatase FHIT
CITRE_005g023480	-0.313923129863284	4.3282702014338e-06	LysM domain-containing protein
CITRE_005g023920	-0.882959968204581	4.3282702014338e-06	PDZ domain-containing protein
CITRE_005g036920	-0.194535371657623	4.36700063409844e-06	Glucose-6-phosphate isomerase
CITRE_008g026220	-0.636687675869416	4.36700063409844e-06	Nodulin-like domain-containing protein
CITRE_009g020630	-0.363726961843891	4.38654781890567e-06	Protein FATTY ACID EXPORT 1%2C chloroplastic
CITRE_002g031460	-0.358873806696229	4.45773617461651e-06	putative protein OSB2%2C chloroplastic
CITRE_007g021960	0.358836898903658	4.50106434980746e-06	Small nuclear ribonucleoprotein E
CITRE_009g003370	0.42398234722263	4.51691282540587e-06	conserved hypothetical protein
CITRE_009g015640	0.762237730888327	4.56585646674493e-06	Galactinol--sucrose galactosyltransferase
CITRE_003g003780	-0.479577118220048	4.63378794609803e-06	Vacuolar protein sorting-associated protein 29
CITRE_009g027700	-0.29600469599314	4.68572759932223e-06	PMR5N domain-containing protein
CITRE_005g032500	-0.290442027577235	4.68727062028577e-06	PH%2C RCC1 and FYVE domains-containing protein 1
CITRE_009g029640	-0.557987342024389	4.76088869312247e-06	Short-chain dehydrogenase TIC 32%2C chloroplastic
CITRE_002g006640	0.320320819530902	4.79284856689579e-06	C2H2-type domain-containing protein
CITRE_001g010610	-0.600180921914725	4.81175680393274e-06	Mitochondrial import inner membrane translocase subunit TIM17-2
CITRE_005g005390	-0.299928885900759	4.8987203442784e-06	Trehalase
CITRE_002g033510	0.402733500246119	4.90550808482052e-06	SHSP domain-containing protein
CITRE_007g009560	-0.372772507558953	4.92214502785481e-06	conserved hypothetical protein
CITRE_010g002230	-1.04332070735167	4.94925862627093e-06	Leucine-rich repeat protein kinase family protein
CITRE_007g016470	-0.534945632038802	4.9506100723324e-06	NB-ARC domain-containing protein
CITRE_009g012120	0.676640788030829	4.98582714156791e-06	conserved hypothetical protein
CITRE_008g001460	-0.664713483563627	4.99115619971015e-06	F-box domain-containing protein
CITRE_002g027810	-0.260618736656684	5.02613364014991e-06	RNA helicase
CITRE_007g002740	-0.361274485679026	5.10833826465031e-06	UBC core domain-containing protein
CITRE_007g021890	0.502462292735796	5.11720037718067e-06	Protein kinase domain-containing protein
CITRE_005g000290	-0.193341126125099	5.1332710169643e-06	Epimerase domain-containing protein
CITRE_004g021900	-0.977906255446074	5.26835644814629e-06	putative disease resistance protein At5g63020
CITRE_006g009400	0.796256843392995	5.31373507122466e-06	putative Uncharacterized acetyltransferase At3g50280
CITRE_004g035300	0.531836876092563	5.3505937831264e-06	conserved hypothetical protein
CITRE_005g011680	-1.52436831812034	5.35710632496181e-06	Hypothetical protein
CITRE_001g031570	0.28545926395362	5.4028800175375e-06	FPL domain-containing protein
CITRE_003g050450	-0.519609061076743	5.41684401768704e-06	U3 small nucleolar RNA-associated protein 18
CITRE_003g060540	-0.635157507063587	5.41684401768704e-06	UDP-galactose/UDP-glucose transporter 2
CITRE_004g013460	0.454302137014319	5.47291882307108e-06	conserved hypothetical protein
CITRE_002g027000	5.47890178550839	5.54033947010108e-06	Bet_v_1 domain-containing protein
CITRE_006g001990	-0.238000716529256	5.56547026572531e-06	ATP citrate synthase
CITRE_008g029580	-0.5840430687989	5.573835252166e-06	Heat shock cognate 70 kDa protein
CITRE_006g008710	-0.413216675180313	5.59425176194736e-06	Ribos_L4_asso_C domain-containing protein
CITRE_004g015230	0.520772875088409	5.6496530006158e-06	Pentatricopeptide repeat-containing protein At1g32415%2C mitochondrial
CITRE_009g027900	0.406542355947905	5.71941702810808e-06	putative Embryo-specific protein ATS3A
CITRE_002g012530	0.393266336150461	5.73731100433561e-06	GRAM domain-containing protein
CITRE_006g003760	-0.498221602325143	5.75026075262213e-06	Isopentenyl-diphosphate Delta-isomerase
CITRE_040g000180	-0.41919148555085	5.76587549368176e-06	TIR domain-containing protein
CITRE_005g032040	0.650995538629944	5.77385885154424e-06	Pentatricopeptide repeat-containing protein At3g21470
CITRE_001g035560	0.280186073159286	5.77637420896564e-06	PPM-type phosphatase domain-containing protein
CITRE_003g035870	-0.408225571380877	5.77637420896564e-06	60S ribosomal protein L9-1
CITRE_007g008440	0.236694688285152	5.78734910941447e-06	Ubiquitin carboxyl-terminal hydrolase 17
CITRE_007g004190	0.951812168162353	5.81598424086811e-06	Pentatricopeptide repeat-containing protein At5g66631
CITRE_002g029750	0.760821153632928	5.83243645723477e-06	putative Pentatricopeptide repeat-containing protein At5g66520
CITRE_004g024850	-0.419615135881633	5.85038707114235e-06	AP2/ERF and B3 domain-containing transcription repressor RAV2
CITRE_009g028950	0.325599326494642	5.86668858257641e-06	conserved hypothetical protein
CITRE_002g035300	1.83983017345187	5.8995658925092e-06	(E%2CE)-geranyllinalool synthase
CITRE_002g031450	-0.459701436059112	5.96460183134889e-06	VHS domain-containing protein
CITRE_003g008100	-0.364065218499237	6.01690460006076e-06	Casein kinase II subunit beta
CITRE_004g013270	0.302335813366269	6.05227535877939e-06	Syntaxin-22
CITRE_001g024990	-0.360360580977603	6.06997897136172e-06	conserved hypothetical protein
CITRE_004g030440	-0.514088560636985	6.07300363952613e-06	WAT1-related protein
CITRE_001g024230	-0.384635813612097	6.09510424995031e-06	Aconitate hydratase%2C cytoplasmic
CITRE_001g006210	0.536590896202896	6.10534303139216e-06	Protein REVERSION-TO-ETHYLENE SENSITIVITY1
CITRE_001g016600	-0.313935871540718	6.1598778174482e-06	Protein kinase domain-containing protein
CITRE_003g048390	0.327601339885521	6.18052702642101e-06	DYW_deaminase domain-containing protein
CITRE_007g000120	0.265769727086164	6.18231444873555e-06	Thioredoxin reductase
CITRE_006g000780	0.394689240908502	6.19229053712035e-06	BHLH domain-containing protein
CITRE_004g019770	-1.23034532864423	6.36163700436749e-06	BHLH domain-containing protein
CITRE_006g026810	-0.31350862596982	6.43377797664096e-06	Stress-response A/B barrel domain-containing protein UP3
CITRE_005g016650	-0.914738417553197	6.47950570463958e-06	Urea-proton symporter DUR3
CITRE_009g021610	-0.427952382156872	6.48270307172256e-06	putative Calcium-transporting ATPase 1%2C plasma membrane-type
CITRE_007g007500	-0.543001971321764	6.5639944956409e-06	Protein kinase domain-containing protein
CITRE_004g026760	0.631438542983878	6.61553598482799e-06	conserved hypothetical protein
CITRE_001g021930	-0.925647081881081	6.62367801147913e-06	putative 3'-5' exonuclease domain-containing protein
CITRE_003g055770	0.533733203113343	6.64672305309113e-06	Non-specific serine/threonine protein kinase
CITRE_003g033870	-0.65326525878719	6.64812056157758e-06	SUI1 domain-containing protein
CITRE_002g016910	0.539858497169509	6.68923807403066e-06	conserved hypothetical protein
CITRE_003g014340	1.0115910199124	6.69017438260611e-06	Flavonol 3-O-glucosyltransferase UGT89B1
CITRE_001g014180	0.463454255996831	6.69865731082745e-06	Peptidase_S9 domain-containing protein
CITRE_003g038630	-0.37869870113089	6.71004990156704e-06	Rhodanese domain-containing protein
CITRE_005g039150	0.501672879103045	6.71004990156704e-06	Thioredoxin-like_fold domain-containing protein
CITRE_003g010280	-0.364615626988101	6.76076666918414e-06	conserved hypothetical protein
CITRE_007g020270	0.594284374081915	6.78828984384725e-06	conserved hypothetical protein
CITRE_008g000490	0.560972183678477	6.79469320420743e-06	Pentatricopeptide repeat-containing protein At2g17140
CITRE_001g000270	-0.308792936595697	6.81704843291099e-06	Myb-like domain-containing protein
CITRE_005g000230	-0.31313470077741	6.81704843291099e-06	FAD-binding FR-type domain-containing protein
CITRE_002g032470	0.315703803989695	6.82347408392575e-06	Obg-like ATPase 1
CITRE_004g000570	0.255175336226342	6.83562797100297e-06	Serine/threonine-protein phosphatase
CITRE_003g013020	2.01052360004281	6.96193903288269e-06	putative UDP-glycosyltransferase 83A1
CITRE_007g013300	0.80613834419384	6.96356506995895e-06	ABC transporter G family member 36
CITRE_004g022480	0.924046375388781	6.97300336393181e-06	Gluconokinase
CITRE_005g002020	-0.520328489643747	7.04222523098413e-06	Pentatricopeptide repeat-containing protein At1g10270
CITRE_006g001350	-0.449907046499934	7.04222523098413e-06	X8 domain-containing protein
CITRE_003g014120	0.706881506653823	7.04826105035562e-06	putative Cytosolic sulfotransferase 1
CITRE_004g024170	-0.343604345304103	7.05230141833235e-06	POTRA domain-containing protein
CITRE_004g014420	0.537991792327965	7.11585192332429e-06	PPM-type phosphatase domain-containing protein
CITRE_003g008700	0.542982027278782	7.13051838768781e-06	G-type lectin S-receptor-like serine/threonine-protein kinase LECRK3
CITRE_008g006460	-0.797930305468115	7.13500291710416e-06	AB hydrolase-1 domain-containing protein
CITRE_006g025300	0.543138072460639	7.20550960505418e-06	putative protein PLASTID MOVEMENT IMPAIRED 2
CITRE_004g032560	-0.586632915366112	7.22706326955911e-06	conserved hypothetical protein
CITRE_004g030980	0.665355718576737	7.30537536108696e-06	Glycosyltransferase family 92 protein
CITRE_006g008550	0.3509140512204	7.30537536108696e-06	PWWP domain-containing protein
CITRE_006g016530	-0.351603167446555	7.30537536108696e-06	putative Mediator of RNA polymerase II transcription subunit 33A
CITRE_005g012840	0.263066055836092	7.33122606789279e-06	putative CBFD_NFYB_HMF domain-containing protein
CITRE_005g030650	-0.427769731989675	7.38543179478245e-06	BTB domain-containing protein
CITRE_009g032240	-1.02044844245363	7.39226193488254e-06	Zinc transporter 1
CITRE_003g000860	0.460070728459234	7.42877279440413e-06	HpcH_HpaI domain-containing protein
CITRE_006g004960	0.515307100080546	7.42877279440413e-06	putative Nicotinate N-methyltransferase 1
CITRE_007g002590	0.383348442860224	7.43073518222101e-06	Protein SHI RELATED SEQUENCE 1
CITRE_009g028230	0.448037506088094	7.46206681057563e-06	Carboxylesterase 1
CITRE_002g025440	0.888814613513083	7.58297540879271e-06	Aldo_ket_red domain-containing protein
CITRE_003g004590	0.312402039670811	7.6346742624079e-06	RING-type domain-containing protein
CITRE_005g021200	0.612968223428131	7.65208278477416e-06	conserved hypothetical protein
CITRE_001g031280	0.213183163521019	7.65612347639538e-06	conserved hypothetical protein
CITRE_003g057760	-0.382952443985727	7.65612347639538e-06	conserved hypothetical protein
CITRE_009g001240	0.437801668171122	7.65612347639538e-06	putative FCA isoform 3
CITRE_001g021670	-0.624239439769153	7.6591892023116e-06	putative DNA polymerase I A%2C chloroplastic/mitochondrial
CITRE_003g058650	0.697810651184636	7.66619991670423e-06	conserved hypothetical protein
CITRE_005g007610	-1.66523065491501	7.67415794632439e-06	conserved hypothetical protein
CITRE_003g006200	0.44087484815325	7.68055131926384e-06	Protein JOKA2
CITRE_005g020630	-0.340089944060423	7.6943703144699e-06	Protein HASTY 1
CITRE_007g011850	-0.533831422678821	7.75544995077413e-06	NB-ARC domain-containing protein
CITRE_003g027530	0.24520371868741	7.79123443830415e-06	Nascent polypeptide-associated complex subunit beta
CITRE_006g010310	-0.246227148822973	7.80636876541327e-06	Arginine biosynthesis bifunctional protein ArgJ%2C chloroplastic
CITRE_006g022040	-0.247326032982734	7.80636876541327e-06	Threonine dehydratase
CITRE_003g029570	0.35067208428419	7.81670442547368e-06	N-acetyltransferase domain-containing protein
CITRE_004g017190	-0.270880927785817	7.82237408646218e-06	Exostosin domain-containing protein
CITRE_006g002310	1.11609064867067	7.82237408646218e-06	DYW_deaminase domain-containing protein
CITRE_001g011440	-0.31659232807443	7.82755455550219e-06	Histone acetyltransferase
CITRE_009g025140	0.680189498409453	7.82755455550219e-06	Hypothetical protein
CITRE_007g005780	-0.600507083946294	7.8518222062818e-06	Exonuclease domain-containing protein
CITRE_008g002110	-0.432617405527337	7.8518222062818e-06	Proteasome subunit alpha type
CITRE_002g039410	1.20149394949307	7.87839375235502e-06	(S)-2-hydroxy-acid oxidase
CITRE_003g051360	-0.622652718933403	7.95616577419794e-06	PHD-type domain-containing protein
CITRE_007g012700	-0.426673257419899	8.01613963381059e-06	conserved hypothetical protein
CITRE_005g032560	1.98162399300565	8.0715922110879e-06	putative Abscisic acid 8'-hydroxylase 3
CITRE_001g016970	0.248091066419988	8.10250485988539e-06	Protein kinase domain-containing protein
CITRE_008g009570	0.280014637958317	8.25882136884042e-06	J domain-containing protein
CITRE_008g016930	0.215557291349539	8.42425617905588e-06	DEAD-box ATP-dependent RNA helicase 21
CITRE_009g032180	-0.441587136158894	8.42425617905588e-06	Phosphoglycerate kinase%2C cytosolic
CITRE_002g035820	-0.385673370608526	8.45109593789647e-06	Fe2OG dioxygenase domain-containing protein
CITRE_007g021440	-0.269080978477737	8.48929998122049e-06	ATPase_AAA_core domain-containing protein
CITRE_009g000230	-0.321807585755772	8.5111207348135e-06	G_PROTEIN_RECEP_F2_4 domain-containing protein
CITRE_008g002530	0.402070455309248	8.55616897439731e-06	RCK N-terminal domain-containing protein
CITRE_009g004500	0.520380476640647	8.55616897439731e-06	conserved hypothetical protein
CITRE_007g002100	-0.522435585448086	8.56582179413867e-06	Transcription initiation factor TFIID subunit 14b
CITRE_046g000130	-0.392132440485312	8.56907892883758e-06	conserved hypothetical protein
CITRE_005g033360	0.662517067719537	8.7001421503606e-06	IPPc domain-containing protein
CITRE_002g029400	-0.461275083273602	8.75925653803005e-06	Arp2/3 complex 34 kDa subunit
CITRE_007g013540	-0.25664763250512	8.78630119316037e-06	RECA_2 domain-containing protein
CITRE_009g027950	0.985400170564524	8.85116796803026e-06	putative Pentatricopeptide repeat-containing protein At5g66520
CITRE_008g003740	0.531969045184662	8.90386893874531e-06	putative Cysteine-rich and transmembrane domain-containing protein WIH2
CITRE_003g053880	0.708441152483792	8.90511280782427e-06	Hydrolase_4 domain-containing protein
CITRE_003g023710	0.336207074945096	8.92365488642482e-06	Phytolongin Phyl2.2
CITRE_086g000100	0.250831156401483	9.03644233619526e-06	conserved hypothetical protein
CITRE_007g024480	-0.694698518779431	9.05647579636744e-06	F-box/LRR-repeat protein 3
CITRE_002g028040	1.10675342750655	9.08660894423897e-06	Hypothetical protein
CITRE_003g012280	1.22497059700728	9.1700618401278e-06	NAC domain-containing protein
CITRE_004g012110	-0.700591542141376	9.17131063634277e-06	eRF1_1 domain-containing protein
CITRE_008g023490	-0.54341847814106	9.1717782314025e-06	40S ribosomal protein S25-3
CITRE_007g013080	0.28939609416037	9.22010414185352e-06	conserved hypothetical protein
CITRE_005g033460	0.420480254133039	9.27224163893411e-06	conserved hypothetical protein
CITRE_008g002560	-0.404384548008367	9.27828918345557e-06	MFS domain-containing protein
CITRE_003g028850	-0.603599982370025	9.31109817769604e-06	putative UPF0426 protein At1g28150%2C chloroplastic
CITRE_006g003180	0.318274088114282	9.4566997164731e-06	conserved hypothetical protein
CITRE_002g002040	-0.322620568319201	9.5481384061491e-06	Zinc finger CCCH domain-containing protein 14
CITRE_009g002590	0.669118470865441	9.5481384061491e-06	AP2/ERF domain-containing protein
CITRE_119g000120	-0.289176496120209	9.60955180524955e-06	Glycerol kinase
CITRE_002g021470	0.463798255471937	9.7537639246338e-06	conserved hypothetical protein
CITRE_007g024470	0.612914268249516	9.7676695652042e-06	putative WRKY transcription factor WRKY24
CITRE_003g055040	-0.241269774990096	9.88501696472675e-06	Vacuolar protein sorting-associated protein 51
CITRE_003g062100	0.379760346107031	9.91281718159092e-06	Chaperone protein dnaJ A6
CITRE_004g003680	-0.24367430713063	9.94803857381542e-06	tRNA-binding domain-containing protein
CITRE_008g004430	0.212959684457719	1.00485657587049e-05	TIP41-like protein
CITRE_003g027940	0.28999775667569	1.00886588034627e-05	RING-type E3 ubiquitin transferase
CITRE_003g044760	0.933205643897332	1.01247271297074e-05	Bet_v_1 domain-containing protein
CITRE_001g026660	-1.57475780729438	1.02344535041576e-05	Oligopeptide transporter 1
CITRE_006g001250	-0.418313765909262	1.0267761440825e-05	NB-ARC domain-containing protein
CITRE_009g004190	-0.453926783477446	1.02755140954589e-05	Acyl carrier protein
CITRE_002g033420	1.97418722677724	1.02806443225186e-05	putative protein DETOXIFICATION 40
CITRE_003g057400	0.418314334804493	1.02868901785471e-05	Auxin-responsive protein SAUR32
CITRE_004g000090	0.611546151368811	1.03043084198129e-05	Radical SAM core domain-containing protein
CITRE_015g000110	0.820100323883793	1.04550413229001e-05	N-acetyltransferase domain-containing protein
CITRE_001g026590	0.414378192028469	1.04993546769792e-05	CRAL-TRIO domain-containing protein
CITRE_002g033360	-0.557374919481688	1.05073767393769e-05	Hypothetical protein
CITRE_006g013130	-0.442758805927382	1.05122673365879e-05	Sulfoquinovosyl transferase SQD2
CITRE_009g009370	2.44900416206308	1.0540915518779e-05	conserved hypothetical protein
CITRE_003g057170	0.427112833371635	1.06091233117511e-05	Pentatricopeptide repeat-containing protein At1g05600
CITRE_001g028830	-0.321172928429297	1.06383231974319e-05	Conserved oligomeric Golgi complex subunit 3
CITRE_005g038980	-0.915289640017182	1.07773354066315e-05	GDSL esterase/lipase EXL3
CITRE_003g061050	-0.347114262161477	1.07970860039186e-05	PPR_long domain-containing protein
CITRE_007g017920	0.873058963349146	1.08123956761938e-05	conserved hypothetical protein
CITRE_005g030700	2.01236567582137	1.08625152610324e-05	conserved hypothetical protein
CITRE_005g024980	0.392340408536134	1.08803842475638e-05	Usp domain-containing protein
CITRE_005g002350	-0.290100257970098	1.12080862500084e-05	FTCD_N domain-containing protein
CITRE_008g021100	0.264818737238393	1.12080862500084e-05	putative prefoldin subunit 4
CITRE_002g026320	0.241438971561647	1.12600155130727e-05	Vac14_Fig4_bd domain-containing protein
CITRE_005g025580	0.72905523310679	1.13278138321857e-05	putative pentatricopeptide repeat-containing protein At1g56570
CITRE_009g018750	-0.248382572630441	1.14161099958098e-05	Mitochondrial fission 1 protein
CITRE_004g025740	1.04560516849999	1.14431853108446e-05	DYW_deaminase domain-containing protein
CITRE_006g028170	0.645433414993241	1.15606984894046e-05	putative Inositol hexakisphosphate and diphosphoinositol-pentakisphosphate kinase VIP2
CITRE_001g006330	1.05600975319313	1.16164376663369e-05	putative beta-1%2C3-galactosyltransferase 12
CITRE_007g009060	0.304897709679237	1.18418841006108e-05	Mediator of RNA polymerase II transcription subunit 18
CITRE_006g008830	-0.361341987864581	1.18592129096332e-05	conserved hypothetical protein
CITRE_007g032520	-0.589578846412124	1.20039806304293e-05	DNA-directed RNA polymerase subunit beta
CITRE_004g001080	-0.338095033921108	1.20277917523918e-05	putative Acid phosphatase 1
CITRE_006g023430	0.379891297276833	1.20362527434464e-05	conserved hypothetical protein
CITRE_003g049240	0.318280667001845	1.20397628159798e-05	Heterogeneous nuclear ribonucleoprotein 1
CITRE_001g029120	-0.888188036528636	1.20410411109699e-05	3-ketoacyl-CoA synthase
CITRE_039g000450	-0.358020673593427	1.2096350959742e-05	Histone H3.3
CITRE_006g015330	-0.758687344982251	1.21671999799132e-05	conserved hypothetical protein
CITRE_003g036390	-0.340919055200246	1.22238305047284e-05	4-hydroxy-tetrahydrodipicolinate reductase 1%2C chloroplastic
CITRE_009g028440	0.892281507954296	1.2273655238111e-05	LysM domain-containing protein
CITRE_048g000240	-0.309775616488782	1.2283086211235e-05	Trafficking protein particle complex II-specific subunit 130
CITRE_002g038200	-0.494690267347516	1.23361486739254e-05	Subtilisin-like protease SBT5.6
CITRE_008g002690	-0.482592512962549	1.23630252287363e-05	SWIM-type domain-containing protein
CITRE_003g015400	0.330934792159169	1.24475592091637e-05	Actin-related protein 4
CITRE_004g016670	0.450518666687031	1.24533691267116e-05	SAM domain-containing protein
CITRE_009g008320	-0.342375523157002	1.24726890708768e-05	hypothetical protein
CITRE_006g024020	0.280383321763315	1.24907961213153e-05	putative RRM domain-containing protein
CITRE_001g002240	0.399209969861197	1.25180495938244e-05	conserved hypothetical protein
CITRE_001g000210	-0.615710453685279	1.25511093746796e-05	DNA topoisomerase
CITRE_008g020900	-1.09023780303093	1.25514433320823e-05	SHSP domain-containing protein
CITRE_006g014870	-1.26764700106109	1.25836507793043e-05	Protein kinase domain-containing protein
CITRE_006g018280	-0.328830550300769	1.25879343449781e-05	PAP_fibrillin domain-containing protein
CITRE_013g000810	0.236132077125727	1.26212573397507e-05	putative disease resistance protein At4g27220
CITRE_003g047120	0.49427217218505	1.26567804037773e-05	Cysteine dioxygenase
CITRE_003g010680	-0.328224844536483	1.28180632342827e-05	ATP-dependent Clp protease proteolytic subunit
CITRE_004g026330	-1.10582454823341	1.28730888888004e-05	Fructokinase-like 2%2C chloroplastic
CITRE_006g026470	0.81814583437248	1.29275247328691e-05	Pentatricopeptide repeat-containing protein At5g38730
CITRE_004g021540	0.366131567960143	1.29921862188293e-05	conserved hypothetical protein
CITRE_002g006200	-0.433376817337534	1.30401182074927e-05	conserved hypothetical protein
CITRE_004g028510	0.483214679445242	1.30706679170231e-05	putative Regulator of G-protein signaling 1
[truncated: 2,050 more rows]

## Sheet: CL ROOTS INTERACTION GENES
Gene	log2FoldChange	padj	annotation
CITRE_001g000280	0.977946863851299	2.42991967737507e-05	Gamma-glutamylcyclotransferase
CITRE_001g000360	1.36875151932877	3.00434070351124e-06	conserved hypothetical protein
CITRE_001g002510	1.19418063170103	0.000794632025499493	Heparanase-like protein 3
CITRE_001g002770	-0.816631899056448	0.000996273715700238	conserved hypothetical protein
CITRE_001g003350	0.466476417874838	0.000997661856093836	putative Abhydrolase_2 domain-containing protein
CITRE_001g003600	2.26410777459362	5.15308778332133e-08	conserved hypothetical protein
CITRE_001g003780	3.07147245515982	1.58112211224085e-09	FAD_binding_3 domain-containing protein
CITRE_001g003790	3.08717596851563	9.11475775985315e-09	conserved hypothetical protein
CITRE_001g004280	-0.716164122532612	0.00211726837193895	conserved hypothetical protein
CITRE_001g006660	-2.33615918602474	0.00100598735518419	conserved hypothetical protein
CITRE_001g007650	-2.53870639383593	0.000316696302591406	Protein NRT1/ PTR FAMILY 6.2
CITRE_001g007960	-2.08707141652138	0.00269954369305062	conserved hypothetical protein
CITRE_001g007970	-1.84491393840426	6.60802402120253e-05	conserved hypothetical protein
CITRE_001g008580	3.77623307746441	1.75889262909664e-24	STAS domain-containing protein
CITRE_001g009650	0.469892917878307	0.000154478925664466	CRC domain-containing protein
CITRE_001g011250	0.466313838996029	0.000380442658839248	IAA-amino acid hydrolase ILR1-like 4
CITRE_001g011430	0.540477133106188	0.000616323505349801	Malonyl-CoA:anthocyanidin 5-O-glucoside-6''-O-malonyltransferase
CITRE_001g012300	1.25007753061741	6.32629218970204e-06	Geraniol 8-hydroxylase
CITRE_001g015800	-1.95311241896906	0.000557515940642092	Protein IQ-DOMAIN 10
CITRE_001g017080	1.21867556681905	1.6640363703271e-13	Metallothionein-like protein type 3
CITRE_001g017770	-1.24064325449298	0.000275076584294657	conserved hypothetical protein
CITRE_001g017790	-1.11803999615336	0.00131223056614466	putative COP1-interacting protein 7
CITRE_001g019980	-0.731604299907915	0.0023503298117143	conserved hypothetical protein
CITRE_001g020040	-1.01163989314305	0.00105109303718857	Alpha-copaene synthase
CITRE_001g021000	-0.476543374868631	0.002024258069468	Ubiquitin-like domain-containing protein
CITRE_001g023560	0.547619492011005	0.00178401067347595	AAA domain-containing protein
CITRE_001g023630	0.88268450596628	1.57752041621755e-07	putative 1-acyl-sn-glycerol-3-phosphate acyltransferase
CITRE_001g023640	0.945425278452424	5.90900058809801e-09	putative 1-acyl-sn-glycerol-3-phosphate acyltransferase
CITRE_001g023700	1.30045028895288	0.000314845631815486	LRRNT_2 domain-containing protein
CITRE_001g025120	2.69775021579456	0.000125232039315462	conserved hypothetical protein
CITRE_001g026840	-0.598798369565971	0.00112829397605513	RING-type domain-containing protein
CITRE_001g026990	-1.602706042898	0.000744207111148468	hypothetical protein
CITRE_001g027580	0.655874226381086	9.12611298947307e-05	putative amino acid permease 7
CITRE_001g027810	0.917456834364019	0.000396113211759126	AAA domain-containing protein
CITRE_001g028030	0.65484402322839	0.00147253837373058	Cysteine protease Cp
CITRE_001g028170	0.808864104681405	7.29140336406503e-05	Str_synth domain-containing protein
CITRE_001g028850	-1.0841180730038	0.000253459742273996	Pectinesterase
CITRE_001g029100	-0.62281856992418	0.000460266201997411	conserved hypothetical protein
CITRE_001g029200	-0.85267838231585	1.13072282282094e-09	conserved hypothetical protein
CITRE_001g029270	0.462329008107333	0.00149619221276718	AB hydrolase-1 domain-containing protein
CITRE_001g030070	-2.48251772602842	0.00130257741883564	Eukaryotic initiation factor 4A-9
CITRE_001g030510	-0.801627486670335	0.00138333390855489	Heparanase-like protein 3
CITRE_001g031310	-0.435865857631187	0.00196866403990094	putative Galacturonokinase
CITRE_001g031350	1.51418510722021	1.59799661475882e-14	ABC transporter domain-containing protein
CITRE_001g031540	2.18306034773434	1.6250769029942e-08	conserved hypothetical protein
CITRE_001g031830	0.431034997357335	0.000110224818969685	Rab-GAP TBC domain-containing protein
CITRE_001g032120	1.76213312855409	2.40249988029123e-05	Peroxidase
CITRE_001g033160	1.49032946333236	2.6306533919163e-05	Glutamate receptor
CITRE_001g034270	-1.56553148366788	0.000179844391409023	Cellulose synthase
CITRE_001g034900	-2.02726011916925	0.00027247337169085	conserved hypothetical protein
CITRE_001g034920	-0.87474803417584	0.00195687882727804	Temperature-induced lipocalin
CITRE_002g001890	1.33813834414947	0.00163638728301813	Peroxidase
CITRE_002g002570	-2.21390455639683	0.00138731256207559	Lipoxygenase
CITRE_002g002690	-2.98522184753791	0.000142347295543169	Lipoxygenase
CITRE_002g004180	0.63406001985621	2.7593217736029e-19	Protein DETOXIFICATION
CITRE_002g004300	0.716057985357615	2.11084779349266e-09	Assimilatory sulfite reductase (ferredoxin)
CITRE_002g004660	1.14232481153477	5.85613800958463e-05	ABC transporter G family member 15
CITRE_002g004740	0.488149112552891	0.000578320060856262	conserved hypothetical protein
CITRE_002g007480	1.08414679511224	1.57752041621755e-07	putative Potassium transporter 8
CITRE_002g007490	0.804092141903133	0.000665668165898809	putative Potassium transporter 8
CITRE_002g008420	2.00542420023276	0.000376011299020354	MFS domain-containing protein
CITRE_002g010050	0.770598920038726	1.0488249514298e-06	C2H2-type domain-containing protein
CITRE_002g010330	-1.0286687046641	0.00177619791854318	Rac-like GTP-binding protein RAC2
CITRE_002g010900	-1.37282512022157	0.002676068735815	ALOG domain-containing protein
CITRE_002g013420	0.549459725633174	0.00185561518890898	Peroxidase
CITRE_002g013730	0.633067018822636	6.04314375058565e-08	F-box/kelch-repeat protein At3g27150
CITRE_002g013900	-1.06898317015939	0.00269221636165626	Phytocyanin domain-containing protein
CITRE_002g014830	0.677440710510653	0.00103947692792234	Cystinosin
CITRE_002g017500	-0.945177757269603	0.000962115981512556	conserved hypothetical protein
CITRE_002g018750	-1.55341842310691	0.000146400454531989	Xyloglucan endotransglucosylase/hydrolase
CITRE_002g018980	-0.750615357654527	0.000228084292074908	Beta-amylase
CITRE_002g019730	1.11341441505925	5.75533502933653e-12	Protein DETOXIFICATION
CITRE_002g020450	1.13904234932076	0.000531565219611648	Pyrophosphate--fructose 6-phosphate 1-phosphotransferase subunit beta
CITRE_002g020780	4.10670038709081	0.000340849036668403	Alpha/beta hydrolase-1
CITRE_002g021080	-1.57202696558158	3.06805253409882e-05	Glycine-rich protein
CITRE_002g021480	-1.4346539681765	0.000137255464524113	Cytochrome b561 and DOMON domain-containing protein
CITRE_002g021570	0.565014581786431	0.00177619791854318	Scarecrow-like transcription factor PAT1
CITRE_002g023000	-2.56371070063102	0.00176532286201502	DUF2431 domain-containing protein
CITRE_002g023050	-1.05283878788581	0.00110946643492253	Subtilisin-like protease SBT5.3
CITRE_002g023830	1.08988621289469	0.000303072296376952	putative UDP-glycosyltransferase 74F2
CITRE_002g023960	0.961568863754351	0.000191471324470966	putative Mogroside IE synthase
CITRE_002g024760	-2.55670153843812	9.07738933058801e-06	conserved hypothetical protein
CITRE_002g025050	-0.963849595611134	1.30674930668946e-05	Receptor-like serine/threonine-protein kinase
CITRE_002g026730	-1.93296028943368	0.00185561518890898	Endoglucanase
CITRE_002g026760	-1.13733706588254	2.15775283326189e-05	Pectinesterase
CITRE_002g027360	0.962356403641581	2.44045291133857e-08	Multicopper oxidase LPR1
CITRE_002g028070	-1.85150263476387	0.000634160254399847	putative Zinc finger CCCH domain-containing protein 15
CITRE_002g028320	-2.19688264315217	8.06178762110359e-07	AAI domain-containing protein
CITRE_002g030010	1.29862542870171	0.000890282827364573	Zinc transporter 8
CITRE_002g030420	0.580128412568291	2.8316940644056e-05	conserved hypothetical protein
CITRE_002g032580	0.610045718340452	0.000179206110958674	Ferredoxin--NADP reductase%2C chloroplastic
CITRE_002g032810	0.491328729538909	0.000489252616763298	ABC-type xenobiotic transporter
CITRE_002g032920	-0.653038679282169	0.000541115892714294	conserved hypothetical protein
CITRE_002g032970	-0.517303169613623	0.000569043711841371	Auxin response factor
CITRE_002g033010	-1.23886627310128	1.95645050633657e-09	CSC1-like protein ERD4
CITRE_002g033540	0.701309871344735	0.00162673964902255	putative Taxadiene 5-alpha hydroxylase
CITRE_002g033730	-3.71900577691273	0.000496229970543587	Beta-glucosidase 47
CITRE_002g034440	-0.86102561292501	0.00154981804809324	conserved hypothetical protein
CITRE_002g034460	0.573077704369549	0.00160153654165757	BHLH domain-containing protein
CITRE_002g034900	-1.18787917400831	0.00128962719526343	SPRY domain-containing protein
CITRE_002g034950	0.532335689164004	1.63629097517543e-05	Calmodulin-binding protein 60 B
CITRE_002g035910	0.955719670802367	0.000236241300388989	UBC core domain-containing protein
CITRE_002g037190	1.62487654155583	8.14370490721688e-05	putative protein trichome birefringence-like 38
CITRE_002g037430	-1.31407357773223	0.000314879715669869	conserved hypothetical protein
CITRE_002g037690	-1.51104562538719	0.00129215061714732	Cellulose synthase
CITRE_002g039490	0.440813026808376	0.000574535403026444	conserved hypothetical protein
CITRE_002g039510	-1.10672118647632	3.32480788817704e-12	Calcium-dependent protein kinase 21
CITRE_002g039700	0.872268184419755	8.30622155733848e-10	Thioredoxin domain-containing protein
CITRE_002g040030	-0.691236179196097	6.3940645370313e-05	Calcium permeable stress-gated cation channel 1
CITRE_002g040400	0.452954685659296	0.00117465124391258	Short-chain dehydrogenase/reductase SDRA
CITRE_003g001580	-0.356824271142085	0.00113358074625713	UBR-type domain-containing protein
CITRE_003g001830	-2.24611754959888	0.00107505502164329	conserved hypothetical protein
CITRE_003g002180	-1.29312490758216	0.000771252389116404	hypothetical protein
CITRE_003g002240	0.432018575987226	0.000841581270763031	Na_H_Exchanger domain-containing protein
CITRE_003g002280	-1.92841196549623	0.00122586061568093	Dirigent protein
CITRE_003g002750	0.591100300038384	0.000303072296376952	Protein kinase domain-containing protein
CITRE_003g003100	0.349061250593301	0.00139521478349752	PA domain-containing protein
CITRE_003g003260	0.529214734661582	0.00127677227524952	5-amino-6-(5-phospho-D-ribitylamino)uracil phosphatase%2C chloroplastic
CITRE_003g003270	0.616122392632237	4.3010159368694e-07	Glutamate--cysteine ligase%2C chloroplastic
CITRE_003g003450	0.501485778917765	0.000536644169775107	Copper-transporting ATPase HMA5
CITRE_003g003660	-1.05387526715782	4.74152705498873e-05	TCP domain-containing protein
CITRE_003g004640	-1.29209682287732	0.000489252616763298	Response regulatory domain-containing protein
CITRE_003g004800	-2.23374371502873	0.00033000696017226	conserved hypothetical protein
CITRE_003g005550	1.54892191167329	1.7736043704137e-05	putative Anthranilate phosphoribosyltransferase%2C chloroplastic
CITRE_003g006470	0.920402200468989	0.000829199461403898	Phenylacetaldehyde oxime monooxygenase CYP71AN24
CITRE_003g007550	-1.71562148523893	2.67785657299279e-05	Protein kinase domain-containing protein
CITRE_003g008260	0.714370893907193	0.000184566334948143	AA_permease_C domain-containing protein
CITRE_003g008630	1.16814919528734	3.32522222138427e-06	Ubiquitin carboxyl-terminal hydrolase
CITRE_003g009350	0.794122652833314	0.000111895667233823	putative aquaporin TIP2-2
CITRE_003g009800	0.553250817192525	0.000419468472914613	Protein NRT1/ PTR FAMILY 6.3
CITRE_003g010400	0.484579899762598	0.00102621658284653	Amine oxidase
CITRE_003g010520	0.264819769061466	0.00033000696017226	conserved hypothetical protein
CITRE_003g010770	-2.68124797548683	0.0012583665446128	conserved hypothetical protein
CITRE_003g011550	-0.805082659352353	0.00223161359797059	putative transcriptional regulator SLK2
CITRE_003g012250	0.639206754209902	0.0015651507572245	hypothetical protein
CITRE_003g012990	-0.592148398752482	2.25394592774437e-05	Diacylglycerol kinase
CITRE_003g013800	0.700349927173687	4.51579740920421e-09	ABC transporter B family member 25
CITRE_003g013920	-1.45935580054067	0.000355955684708481	COBRA-like protein
CITRE_003g016570	-1.65511592142959	5.5130715135968e-06	AAI domain-containing protein
CITRE_003g016620	1.38467303676511	8.05467351496183e-08	conserved hypothetical protein
CITRE_003g017930	-0.367323316698585	0.00157444896067549	Uroporphyrinogen decarboxylase
CITRE_003g018250	0.920445316682587	3.35607072431425e-05	PGG domain-containing protein
CITRE_003g018350	0.594054300048622	0.0019619459944954	putative protein phosphatase 2C 73
CITRE_003g018390	1.63710393526451	0.00225489240951362	conserved hypothetical protein
CITRE_003g019470	-2.14560841171934	5.93524991686516e-16	Inhibitor of trypsin and hageman factor
CITRE_003g019560	-0.763276336287195	0.000410457883611215	Gamma-glutamyl hydrolase 2
CITRE_003g021190	0.566442518611849	0.000535137402076819	Persulfide dioxygenase ETHE1%2C mitochondrial
CITRE_003g025300	-1.41074385672743	0.000257253735736092	Growth-regulating factor
CITRE_003g025520	-0.718093594895563	0.000459220187825183	LEA_2 domain-containing protein
CITRE_003g026420	1.11570744502302	3.05477827926178e-10	conserved hypothetical protein
CITRE_003g026630	-1.06027119095618	0.000794632025499493	C2H2-type domain-containing protein
CITRE_003g027010	-1.54905234146564	0.000212360602367022	VARLMGL domain-containing protein
CITRE_003g027700	0.438314742155135	9.83063559824377e-05	Dehydrogenase/reductase SDR family member FEY
CITRE_003g027950	0.961083713164942	1.02361528435694e-05	WAT1-related protein
CITRE_003g028680	-2.50707630958281	0.0014185267465178	putative 21 kDa seed protein
CITRE_003g030150	0.654366745975754	8.14370490721688e-05	12-oxophytodienoate reductase 2
CITRE_003g030390	1.68000061709586	0.000703205834002294	Anthranilate N-methyltransferase
CITRE_003g030460	1.79793055904634	0.000559430302158219	Anthranilate N-methyltransferase
CITRE_003g030480	1.63800591183742	0.00085311451583615	putative Caffeic acid 3-O-methyltransferase 1
CITRE_003g030800	-1.7721541104111	2.34979801827099e-05	Hypothetical protein
CITRE_003g032780	1.04696551724874	0.000376540291610456	putative Disease resistance protein Roq1
CITRE_003g034610	-0.520150958556812	0.000506229608662728	RRM domain-containing protein
CITRE_003g036720	0.861582411291545	8.48204106431794e-05	RPW8 domain-containing protein
CITRE_003g038530	0.493567953371111	0.00195197549973719	putative (+)-neomenthol dehydrogenase
CITRE_003g039600	1.97782840921597	0.00122586061568093	Hypothetical protein
CITRE_003g044210	0.82642426719534	2.46830634841369e-05	putative Anthranilate N-methyltransferase
CITRE_003g046040	1.03412161873383	2.48001944907814e-05	Expansin
CITRE_003g046310	0.945825058944348	1.0768395696387e-05	Myb_CC_LHEQLE domain-containing protein
CITRE_003g046800	0.637325389523765	0.00176532286201502	conserved hypothetical protein
CITRE_003g047390	-0.694041719932517	0.000231929089176691	conserved hypothetical protein
CITRE_003g049060	-1.21286413059573	0.000717174360708973	conserved hypothetical protein
CITRE_003g049170	-1.46482072951446	0.000598553860756374	Cellulose synthase
CITRE_003g050090	1.89445362668844	5.29578088705362e-05	LOB domain-containing protein
CITRE_003g050900	-1.52629784051075	7.93409659288203e-05	C2H2-type domain-containing protein
CITRE_003g051320	0.797141275142557	7.29140336406503e-05	FLZ-type domain-containing protein
CITRE_003g051380	-1.5697876252137	0.00268729866925169	conserved hypothetical protein
CITRE_003g052260	-1.82704860688366	0.00154198597398048	Hexosyltransferase
CITRE_003g052550	0.536564700003187	0.00162339254156914	Abhydrolase_3 domain-containing protein
CITRE_003g052840	-0.596260860217765	5.5130715135968e-06	Protease Do-like 2%2C chloroplastic
CITRE_003g053440	0.682207280335569	0.000340849036668403	Rapid alkalinization factor
CITRE_003g053660	0.693159942417048	1.22282226252027e-06	RING-type E3 ubiquitin transferase
CITRE_003g053680	0.766995622025625	2.09238227937831e-05	putative Beta-glucosidase 11
CITRE_003g054170	1.03658978250827	4.8742121332016e-08	RING-type domain-containing protein
CITRE_003g055900	0.648241193974487	0.00222602825115749	conserved hypothetical protein
CITRE_003g056650	-1.13755462123	0.00195687882727804	S5A_REDUCTASE domain-containing protein
CITRE_003g056710	-2.8502971686979	0.00229087644574661	WAT1-related protein
CITRE_003g057320	0.936266672921876	3.91316494516075e-06	conserved hypothetical protein
CITRE_003g057440	1.72781226550192	2.81314387201719e-08	Cytochrome P450 78A9
CITRE_003g057460	0.497460238897018	0.00209474508335828	Cytochrome b5 heme-binding domain-containing protein
CITRE_003g058050	-1.68716986891227	0.000129288913320244	putative Cytochrome b561 and DOMON domain-containing protein At3g61750
CITRE_003g059230	-1.04546485060849	0.00010688890609878	FAD-binding FR-type domain-containing protein
CITRE_003g059950	-0.870070777832961	8.12752448881463e-07	Remorin
CITRE_003g061020	0.443924967765927	0.000334946030168874	AT-hook motif nuclear-localized protein
CITRE_003g061610	0.464922958304249	3.99704242893743e-05	Scarecrow-like protein 6
CITRE_004g000440	-2.8937675399759	5.49231778844795e-07	conserved hypothetical protein
CITRE_004g001120	-1.36300138415281	0.00188488526547072	Laccase
CITRE_004g001810	0.389032536667623	2.65065881227709e-06	Peptidyl-prolyl cis-trans isomerase
CITRE_004g002910	0.654508851015605	0.00179127188684336	Amino acid transporter AVT6C
CITRE_004g003500	0.594663738518154	0.000510101741019558	putative Expansin-A8
CITRE_004g003520	-1.64397236170207	1.12637368710438e-06	RING-type domain-containing protein
CITRE_004g004640	0.511135562203363	1.69028985523568e-09	conserved hypothetical protein
CITRE_004g004770	-1.38136543208417	0.00113871588271681	RRM domain-containing protein
CITRE_004g005180	0.885117016953459	9.35797327327484e-06	Two-component response regulator
CITRE_004g005560	0.701313845076306	2.92495340903803e-06	STAS domain-containing protein
CITRE_004g007760	-0.862811175495698	0.00191426652600719	Auxin response factor
CITRE_004g011680	-1.57353262065161	0.000314879715669869	PMR5N domain-containing protein
CITRE_004g014810	-0.529118561708796	0.00152226800067513	Methyltransferase
CITRE_004g015090	0.616445703752625	0.00195687882727804	putative NAC domain-containing protein
CITRE_004g015590	0.544564483295486	0.00112984121678817	conserved hypothetical protein
CITRE_004g016150	1.41097383428233	0.000543022691800546	conserved hypothetical protein
CITRE_004g017530	-0.698997271486932	0.00191426652600719	putative Toll-Interleukin-Resistance TIR domain family protein
CITRE_004g017540	0.34321163772481	0.000618422413886274	putative Metacaspase-1
CITRE_004g017590	1.06093133724558	0.00109622998415896	putative Glutamate dehydrogenase 2
CITRE_004g017820	2.70314017159229	1.30242258267421e-06	LRRNT_2 domain-containing protein
CITRE_004g019650	-1.73319334440063	0.00225489240951362	Protein NRT1/ PTR FAMILY 4.2
CITRE_004g020240	0.546653729299045	0.000943126648904023	Protein DETOXIFICATION
CITRE_004g020350	0.678396204281873	0.00223208109081888	Protein DETOXIFICATION
CITRE_004g021060	0.674127940272339	0.00023081429186397	Glutathione transferase
CITRE_004g021070	0.955971387470664	0.00130718980162931	Glutathione transferase
CITRE_004g021240	-0.552653199328861	0.000989162834667828	Non-specific phospholipase C3
CITRE_004g021810	0.521362783778797	5.51153011227205e-06	Gamma-glutamylcyclotransferase family protein
CITRE_004g022360	0.556635610997028	0.00045596965104293	NB-ARC domain-containing protein
CITRE_004g022370	0.698471738091882	0.00223161359797059	DUF4220 domain-containing protein
CITRE_004g022390	-1.49179502387103	5.90168731571417e-07	Carotenoid cleavage dioxygenase 4a
CITRE_004g024920	-0.889450292185068	1.27738434456999e-05	BHLH domain-containing protein
CITRE_004g025180	-4.99654577737766	4.7562015331584e-10	conserved hypothetical protein
CITRE_004g025400	-0.610580739060154	0.000504368849754275	conserved hypothetical protein
CITRE_004g025450	0.413511366184183	0.000163919626821406	S-adenosylmethionine decarboxylase proenzyme
CITRE_004g025590	-0.674590978592919	3.36695925146265e-08	Protein PHYLLO%2C chloroplastic
CITRE_004g025880	-1.94198764497393	8.93092572221542e-06	conserved hypothetical protein
CITRE_004g026920	0.398569826875329	0.0015651507572245	Glucose-6-phosphate 1-dehydrogenase
CITRE_004g027200	0.398096759290033	0.000445181292503099	Histidine kinase
CITRE_004g027440	-2.22697256411868	4.07852669155691e-09	Cytochrome P450 78A4
CITRE_004g027500	-1.73947302097121	0.000144467668271527	65-kDa microtubule-associated protein 8
CITRE_004g028380	0.706838410428773	0.000132536670353936	putative Tryptamine 5-hydroxylase
CITRE_004g028420	0.490925378839028	1.59690889248817e-08	Response regulatory domain-containing protein
CITRE_004g028610	0.421601591676915	2.45887039566858e-06	conserved hypothetical protein
CITRE_004g028850	0.78425236817712	0.000599918049242898	Cellulase domain-containing protein
CITRE_004g029230	-0.770336734894191	0.000275076584294657	conserved hypothetical protein
CITRE_004g030350	0.239617246687131	0.000794632025499493	conserved hypothetical protein
CITRE_004g030800	-1.28605236150782	0.000385651069775237	conserved hypothetical protein
CITRE_004g031660	0.374521487023984	0.00150040358772852	Ubiquitin-conjugating enzyme E2 2
CITRE_004g031790	-0.899411006637202	0.000270833736639343	Homeobox domain-containing protein
CITRE_004g031920	-1.25735559295331	0.000310710677285451	TCP domain-containing protein
CITRE_004g032310	0.228117018569937	0.000221673980324919	conserved hypothetical protein
CITRE_004g033280	0.783283264551982	0.00204616412244827	conserved hypothetical protein
CITRE_004g033460	-1.34854143479471	7.86840153202189e-06	Carboxypeptidase
CITRE_004g034400	0.6020506438094	0.000464033364291644	conserved hypothetical protein
CITRE_004g034500	-1.06801337556706	0.00140803263557507	conserved hypothetical protein
CITRE_004g034510	1.08845561694842	9.07738933058801e-06	Protein DETOXIFICATION
CITRE_004g034760	0.58231031487127	7.81939560700071e-05	putative Peptidyl-prolyl cis-trans isomerase FKBP42
CITRE_004g034940	0.755491021828711	3.85476604731759e-05	TP_methylase domain-containing protein
CITRE_004g035370	-2.28009723995254	0.00057462876466047	conserved hypothetical protein
CITRE_005g001120	-3.86434620287569	1.96228288591673e-05	Hypothetical protein
CITRE_005g001150	-0.578826565318655	3.2763591361351e-06	Auxin response factor
CITRE_005g001190	-4.84122393329737	1.37168186396295e-08	Hypothetical protein
CITRE_005g001470	-0.821529810382803	5.06984525545e-07	Auxin response factor
CITRE_005g001480	-0.772240365601089	4.83252502406475e-07	putative Mitogen-activated protein kinase kinase kinase 1
CITRE_005g002040	-1.51076042662225	4.54128990632243e-08	putative DNA binding protein
CITRE_005g002140	-0.829518044922534	3.01313714149848e-05	conserved hypothetical protein
CITRE_005g002340	-0.566998765935567	0.00120623820068084	Non-lysosomal glucosylceramidase
CITRE_005g004360	-1.73242629481648	0.000275076584294657	conserved hypothetical protein
CITRE_005g004450	0.798901850078226	5.51153011227205e-06	UDP-glucose 4-epimerase
CITRE_005g004710	-1.95850177605788	0.00065799735273195	hypothetical protein
CITRE_005g004740	-1.58107551367888	0.00258195434631111	conserved hypothetical protein
CITRE_005g005010	1.58531595341229	0.00165440522093993	putative L-type lectin-domain containing receptor kinase IX.1
CITRE_005g005240	0.884809452557821	1.12528870843146e-05	Demethylepipodophyllotoxin synthase
CITRE_005g006010	-1.88597553467352	0.000376011299020354	Protein kinase domain-containing protein
CITRE_005g006020	-2.687279814222	2.46830634841369e-05	putative Leucine-rich repeat receptor-like serine/threonine-protein kinase BAM2
CITRE_005g006460	-3.01005183561895	0.000425418151420391	conserved hypothetical protein
CITRE_005g007080	1.18256438153012	3.01705270054434e-07	conserved hypothetical protein
CITRE_005g007090	0.725390040803274	3.19541988718525e-05	F-box domain-containing protein
CITRE_005g007140	1.10428378313212	0.00227151093742225	Hypothetical protein
CITRE_005g007150	0.926731991021655	0.00210690311545668	conserved hypothetical protein
CITRE_005g007160	0.912873172944038	0.000650941893451495	hypothetical protein
CITRE_005g007280	1.18999070905378	0.000190915245550297	Geranylgeranyl pyrophosphate synthase%2C chloroplastic
CITRE_005g007340	1.3197751373167	2.15775283326189e-05	putative Geranylgeranyl pyrophosphate synthase%2C chloroplastic
CITRE_005g009490	-1.39219506546142	0.000134224688553774	conserved hypothetical protein
CITRE_005g011030	-1.7808580608289	3.46355756222629e-06	conserved hypothetical protein
CITRE_005g011050	-1.77880052368347	3.38111841752833e-06	conserved hypothetical protein
CITRE_005g012640	1.34742616611503	3.14959193166233e-19	Abhydrolase_3 domain-containing protein
CITRE_005g013470	1.0815178697618	1.85883477271316e-06	MFS domain-containing protein
CITRE_005g015170	0.636126787719698	3.329878415334e-05	PGG domain-containing protein
CITRE_005g015500	0.584107588270329	0.000282965115560532	Demethylepipodophyllotoxin synthase
CITRE_005g016630	1.23884957442292	0.000253459742273996	Ubiquinol oxidase
CITRE_005g017890	1.09017771250083	0.00210247764119965	Pectin acetylesterase
CITRE_005g017910	1.16837748361516	0.00136592814564287	Pectin acetylesterase
CITRE_005g018390	-2.02856563139829	0.00010143812468218	Auxin-responsive protein
CITRE_005g019330	0.816363052644693	1.77069330920826e-05	UDP-glycosyltransferase 76B1
CITRE_005g020520	0.982672218379291	3.36695925146265e-08	3-oxo-Delta(4%2C5)-steroid 5-beta-reductase
CITRE_005g020610	0.6157228441585	0.000962115981512556	3-oxo-Delta(4%2C5)-steroid 5-beta-reductase
CITRE_005g021180	0.624730753551488	0.00148548106143883	Shikimate_dh_N domain-containing protein
CITRE_005g021490	0.908609386926156	0.000700979390446974	NB-ARC domain-containing protein
CITRE_005g022340	1.03695827784054	3.01313714149848e-05	Epimerase domain-containing protein
CITRE_005g024160	0.902802688103391	0.00185136181885775	HIG1 domain-containing protein
CITRE_005g025160	0.357914152433962	0.00116686569511059	conserved hypothetical protein
CITRE_005g025170	1.10557909009718	0.00124901920530036	Nicotianamine synthase
CITRE_005g025660	-2.27195684672134	1.18349875378768e-05	Galactinol synthase 2
CITRE_005g026170	1.18626933503814	0.000376011299020354	Zinc finger protein ZAT10
CITRE_005g026770	-1.83601847758354	0.00206333494966336	putative Homeotic protein knotted-1
CITRE_005g026780	-1.87687451200764	0.000464033364291644	putative Homeobox protein knotted-1-like 2
CITRE_005g026830	-8.25835541031883	2.22047404605011e-05	Hypothetical protein
CITRE_005g026920	0.766266821013512	0.000125020551104226	Aa_trans domain-containing protein
CITRE_005g027360	0.461120763553806	0.00171824963230623	K-box domain-containing protein
CITRE_005g027440	-1.16941253689074	3.99704242893743e-05	Rhamnogalacturonan endolyase
CITRE_005g027700	0.525887301286369	0.00081004043780867	conserved hypothetical protein
CITRE_005g028680	0.985337635616906	0.0011448588709288	Protein EXORDIUM-like 2
CITRE_005g028720	0.89907318378132	7.29140336406503e-05	Glycosyltransferase
CITRE_005g029110	1.51303113376694	0.00127677227524952	Thioredoxin domain-containing protein
CITRE_005g029630	0.655579961960555	0.000242972722823893	Transcription factor TGA7
CITRE_005g029880	0.494765749125185	6.21799922396516e-06	conserved hypothetical protein
CITRE_005g029900	1.37542428545881	0.000249443023193968	Nitrate reductase
CITRE_005g030370	0.747379214783704	1.77071072514792e-05	WAT1-related protein
CITRE_005g030700	0.760555266057758	6.35262265709584e-06	conserved hypothetical protein
CITRE_005g030720	0.61121010724357	0.000173225701770415	putative IAA-amino acid hydrolase ILR1-like 6
CITRE_005g030740	-1.78109060406746	0.00157532721840464	Response regulatory domain-containing protein
CITRE_005g031740	0.565005544760132	0.00127114818848092	ACT domain-containing protein ACR3
CITRE_005g032350	-1.1670090743042	3.06427019316228e-05	Protein kinase domain-containing protein
CITRE_005g032390	1.21728469945331	0.000518383793100207	conserved hypothetical protein
CITRE_005g033920	-0.540118364937724	2.74067909252525e-06	Calcium-dependent protein kinase 11
CITRE_005g034180	0.660907114156198	0.00228184136591805	Protein DETOXIFICATION
CITRE_005g035070	-1.12038972867303	0.000432341023635249	Homeobox domain-containing protein
CITRE_005g035420	-0.980960792918594	0.0017073992795799	Alpha-amylase
CITRE_005g035930	-1.29425930378244	0.000895680851296655	conserved hypothetical protein
CITRE_005g036480	-1.3083070956838	0.00253518018563977	Hexosyltransferase
CITRE_005g036620	-1.01460123694931	0.00064232391177126	conserved hypothetical protein
CITRE_005g036670	-0.737752834095313	0.00164875868523766	PPPDE domain-containing protein
CITRE_005g037450	-0.939995334347341	0.000123753090334524	conserved hypothetical protein
CITRE_005g037730	1.33225512520529	0.000329604038566356	Cytokinin dehydrogenase
CITRE_005g037770	-1.27089335448866	0.000303072296376952	Beta-galactosidase
CITRE_005g038510	-1.04744149820142	0.00150040358772852	WEB family protein At1g75720
CITRE_005g038570	-1.95207497178335	0.000727738757785266	Snakin-2
CITRE_005g038810	0.634073229447283	0.00104426341493137	Protein kinase domain-containing protein
CITRE_005g039600	-0.427458952271076	0.00113358074625713	Dehydrin ERD10
CITRE_005g040620	2.18331441731007	0.000168617437465614	Protein PIN-LIKES 1
CITRE_006g001380	-1.63793733568438	2.69051286273588e-05	Protein kinase domain-containing protein
CITRE_006g003450	1.00121151772959	0.000162397538033377	conserved hypothetical protein
CITRE_006g005130	-3.76560562108453	0.000850140542278092	Phospholipase A1
CITRE_006g007090	0.579460972607106	0.000154035815344107	Protein kinase domain-containing protein
CITRE_006g007500	0.451159166253188	0.000616794478773806	CASP-like protein 5A1
CITRE_006g007980	-0.771269307642977	0.000319696756679351	Peroxidase
CITRE_006g008680	-1.5532130077329	3.35607072431425e-05	conserved hypothetical protein
CITRE_006g008980	1.16721217252137	0.000526103039723943	putative Glutathione S-transferase L3
CITRE_006g009070	-2.28193902876498	0.00155271795164854	RING-type domain-containing protein
CITRE_006g009180	1.21133760986774	3.67848326296557e-12	Protein ALUMINUM SENSITIVE 3
CITRE_006g010080	1.25541526051081	3.03093449582903e-12	Na_H_Exchanger domain-containing protein
CITRE_006g010380	-1.51786089741089	0.00173025956160571	RING-type domain-containing protein
CITRE_006g010980	-1.73458084973604	0.00167762287145978	Laccase
CITRE_006g011360	0.712798929939593	5.69677187672128e-09	Tropinone reductase
CITRE_006g011410	1.02252176104942	0.00038546269312939	putative Tropinone reductase
CITRE_006g011580	0.839748997297742	7.26495691151375e-05	conserved hypothetical protein
CITRE_006g011720	0.48874349918456	0.00222826168419866	NADPH-dependent aldo-keto reductase%2C chloroplastic
CITRE_006g012280	1.76682817650909	2.36285084394503e-08	AAI domain-containing protein
CITRE_006g012290	1.68611165040866	1.18629373953131e-10	AAI domain-containing protein
CITRE_006g012380	-1.44016666767282	0.000994820631041704	SHSP domain-containing protein
CITRE_006g012520	0.738039426351288	0.00177884694220366	Laccase
CITRE_006g013850	0.473278612883471	0.000378669752558527	GDSL esterase/lipase CPRD49
CITRE_006g013900	0.742217664110716	0.00121929083394185	Pyridoxal 5'-phosphate synthase subunit PDX1.3
CITRE_006g015160	0.573653046368127	0.000318754987155708	conserved hypothetical protein
CITRE_006g015330	0.783914809272716	0.00196748148913916	conserved hypothetical protein
CITRE_006g015490	0.648181236938156	0.00148858776919906	Non-specific serine/threonine protein kinase
CITRE_006g015850	0.249923574478148	0.000142347295543169	B3 domain-containing transcription repressor VAL2
CITRE_006g015960	0.853700230604264	2.02797936745674e-25	conserved hypothetical protein
CITRE_006g017200	-0.372723783769754	0.000242972722823893	Glycosyltransferase
CITRE_006g018640	0.799442990569419	4.32997487477347e-09	ZT_dimer domain-containing protein
CITRE_006g019270	1.36460152916203	3.17221388630337e-06	Abhydrolase_3 domain-containing protein
CITRE_006g019290	1.07716887697686	0.000897224615559651	Abhydrolase_3 domain-containing protein
CITRE_006g021160	-1.51426012805508	0.00275806917180031	Germin-like protein
CITRE_006g021350	1.88251556868271	0.000110224818969685	putative F-box protein At2g27310
CITRE_006g021690	0.65741253965645	0.000431028461442317	Apple domain-containing protein
CITRE_006g022140	1.44780344667588	4.49587586335347e-07	Sulfite exporter TauE/SafE family protein 4
CITRE_006g023240	0.76185082669037	2.64539938072226e-13	WAT1-related protein
CITRE_006g023930	-1.75086998735257	0.00149022813904837	Gibberellin-regulated protein 5
CITRE_006g024310	0.449814827297358	0.00218342826888148	putative Geranylgeranyl pyrophosphate synthase%2C chloroplastic
CITRE_006g024720	-3.33108773760272	0.00220107908145193	Beta-glucosidase 44
CITRE_006g025130	2.06285974658381	0.00162977923371974	conserved hypothetical protein
CITRE_006g025340	-0.929798201010304	0.00176295419906158	AAI domain-containing protein
CITRE_006g025380	2.42543721982021	2.66218609762383e-05	putative glutamine amidotransferase GAT1_2.1
CITRE_006g025840	-1.06675058357916	0.00200199681251278	Cytokinin hydroxylase
CITRE_006g027850	1.45818377196434	8.63828242129509e-16	ABC transporter B family member 15
CITRE_006g027860	0.977340617291917	0.00084348943114545	ABC transporter B family member 15
CITRE_006g028600	0.786369263001746	0.0026392973146772	Cysteine dioxygenase
CITRE_006g028810	2.29602690702456	1.3460878971558e-05	conserved hypothetical protein
CITRE_006g028860	-1.56606797203482	8.31673390632856e-05	conserved hypothetical protein
CITRE_006g029060	-2.18624934350605	0.00151680691975776	ZF-HD dimerization-type domain-containing protein
CITRE_006g029710	-0.565436716413992	0.00175452023089494	conserved hypothetical protein
CITRE_006g029730	-1.38928421276666	0.00255445199552021	Cyclic nucleotide-binding domain-containing protein
CITRE_007g000680	-1.71038961113858	0.000414541967151309	Protein DETOXIFICATION
CITRE_007g001590	1.25330939244525	4.8817323371951e-06	Oligopeptide transporter 7
CITRE_007g002290	-1.39712321390461	0.00077535280375403	NAC domain-containing protein
CITRE_007g002360	0.41274607858333	0.000396363160030425	putative serine protease EDA2
CITRE_007g002630	0.852320571613787	8.06178762110359e-07	Protein WALLS ARE THIN 1
CITRE_007g003050	-0.978537456529663	0.000160856852285846	Mannan endo-1%2C4-beta-mannosidase
CITRE_007g003170	0.590356797129877	0.00129777834577513	putative Phosphopantetheine adenylyltransferase
CITRE_007g003220	-0.545553221171801	2.69051286273588e-05	Tubby-like F-box protein
CITRE_007g003510	0.522922168733983	0.00157178626716158	SCARECROW-LIKE protein 7
CITRE_007g003910	1.40612875974036	4.8817323371951e-06	Homeobox domain-containing protein
CITRE_007g003970	0.735244824855094	0.000137231808533108	Glycosyltransferase
CITRE_007g004020	1.08592704194351	1.27506634866373e-06	GGPS
CITRE_007g004650	-3.54352465203074	3.84610332986467e-05	AB hydrolase-1 domain-containing protein
CITRE_007g004690	-3.47293968179231	0.000145408452783415	AB hydrolase-1 domain-containing protein
CITRE_007g005080	-1.31925279821938	0.000253843858405412	Cyclin-dependent kinase inhibitor
CITRE_007g005440	-0.782298145505907	3.01705270054434e-07	BHLH domain-containing protein
CITRE_007g005470	1.30798709314644	2.22047404605011e-05	F-box domain-containing protein
CITRE_007g006410	-0.772912980756796	0.00117028930482322	BTB/POZ domain-containing protein SR1IP1
CITRE_007g006560	1.34345549412751	0.00201893326647777	N-acetyltransferase domain-containing protein
CITRE_007g006790	-1.34663581525747	0.00170561125068183	conserved hypothetical protein
CITRE_007g007040	-0.836282809342542	0.000726848953734862	Phytosulfokine
CITRE_007g007080	-1.84493659905415	0.000748652517899773	conserved hypothetical protein
CITRE_007g008080	0.49305681758559	0.000544163831825267	UDP-glycosyltransferase 91A1
CITRE_007g008300	0.804834786908513	3.00017257160781e-10	putative MADS-box protein JOINTLESS
CITRE_007g008310	0.546590889758221	0.000748652517899773	MADS-box domain-containing protein
CITRE_007g008620	-1.27686562480441	1.30674930668946e-05	putative protein DETOXIFICATION 27
CITRE_007g008650	0.949459369116068	2.57859240885418e-06	Protein DETOXIFICATION
CITRE_007g008850	0.610851269964236	0.000456958667240363	conserved hypothetical protein
CITRE_007g009690	-1.51914787539394	0.000286864679396932	Peptidase A1 domain-containing protein
CITRE_007g009890	0.247803832901875	0.000715191061990582	ESCRT-related protein CHMP1B
CITRE_007g010260	-2.53709885391663	0.000373435372847486	ABC-type xenobiotic transporter
CITRE_007g011400	-2.64031749269031	3.05477827926178e-10	PGG domain-containing protein
CITRE_007g011720	-0.763675829892312	4.91093419286704e-06	VWFA domain-containing protein
CITRE_007g011920	-2.13095466392827	0.0026323304200123	Hypothetical protein
CITRE_007g012150	-1.62125259067525	0.000727738757785266	conserved hypothetical protein
CITRE_007g013150	-0.865671860124157	0.00171243346240002	Auxin-responsive protein
CITRE_007g013170	-0.876890482827782	0.00143870483170294	LysM domain receptor-like kinase 3
CITRE_007g013180	0.802654406471345	3.49384059306353e-09	TauD domain-containing protein
CITRE_007g013360	-0.691872718324255	0.000664172576778603	Homeobox-leucine zipper protein ATHB-15
CITRE_007g013730	-0.544208290544337	0.000334946030168874	Auxin-responsive protein
CITRE_007g015020	3.24827370866524	0.00204297446435291	putative Thionin-like protein 2
CITRE_007g015570	2.3203033281533	0.00051273791424758	Protein kinase domain-containing protein
CITRE_007g016000	0.402027204248183	0.00135812782879813	Pleiotropic drug resistance protein 1
CITRE_007g016210	0.406172944407717	0.00011254197450049	AB hydrolase-1 domain-containing protein
CITRE_007g017010	0.790344857706824	3.11633305612606e-05	VOC domain-containing protein
CITRE_007g017670	-2.46316815060687	0.00100753408225745	Peroxidase
CITRE_007g020330	1.30091276656544	0.000999442664547987	Aquaporin NIP6-1
CITRE_007g020340	1.5633677627673	0.000211223618339275	conserved hypothetical protein
CITRE_007g020460	0.736255184060748	9.67829813653149e-05	Metal transporter Nramp6
CITRE_007g021100	0.444929246456806	0.00181932291064502	putative protein HEADING DATE REPRESSOR 1
CITRE_007g022000	-0.629013130394697	0.00212645803471504	Protein kinase domain-containing protein
CITRE_007g022090	0.895614604825678	4.30941054920351e-05	Coumarin 8-geranyltransferase 1b%2C chloroplastic
CITRE_007g023170	2.06624728720271	5.72381578956852e-06	Hypothetical protein
CITRE_007g023520	-1.52784706420525	0.000153134171036936	Terpene cyclase/mutase family member
CITRE_007g024480	1.14197317209367	6.65197306750336e-09	F-box/LRR-repeat protein 3
CITRE_007g026140	1.93927972380092	0.000207975283508998	Aa_trans domain-containing protein
CITRE_007g029050	-3.28783577104493	0.00258195434631111	putative E3 ubiquitin-protein ligase ATL76
CITRE_007g029060	-1.58843635948746	0.002024258069468	RING-type E3 ubiquitin transferase
CITRE_007g029070	-2.23468809948129	0.00243518532548113	RING-type E3 ubiquitin transferase
CITRE_007g029120	-1.34259883913179	0.000698387307510701	RING-type E3 ubiquitin transferase
CITRE_007g029280	0.652429616996841	1.2430271490419e-06	FAD_binding_3 domain-containing protein
CITRE_007g030320	-0.266113520710556	0.000543949288234148	RNA cytidine acetyltransferase
CITRE_007g032280	1.04665216709093	8.14370490721688e-05	conserved hypothetical protein
CITRE_007g032360	0.569832129470054	0.000250884098460542	conserved hypothetical protein
CITRE_008g000700	0.817635732970361	5.2504523203025e-05	O-fucosyltransferase family protein
CITRE_008g001030	0.338553599146669	0.000561445225196634	conserved hypothetical protein
CITRE_008g001350	0.381003288933414	2.77524912259802e-06	Heterodimeric geranylgeranyl pyrophosphate synthase small subunit%2C chloroplastic
CITRE_008g001870	0.71811085210164	0.00142417307455328	Glycerate dehydrogenase
CITRE_008g002000	0.8136590653171	1.77071072514792e-05	Protein kinase domain-containing protein
CITRE_008g002010	0.960438194675759	1.02600176639028e-06	Ubiquitin-conjugating enzyme E2 10
CITRE_008g002020	0.506047260495968	0.00201820761332601	Rac-like GTP-binding protein ARAC3
CITRE_008g002620	0.294684049995728	0.00155028218216984	SNARE-interacting protein KEULE
CITRE_008g002630	0.504587228061761	2.34979801827099e-05	conserved hypothetical protein
CITRE_008g003000	1.97343298795352	0.000703205834002294	Squalene monooxygenase
CITRE_008g003340	0.948105047510924	0.000774996401789336	conserved hypothetical protein
CITRE_008g003770	-1.32221576192243	8.85465264901053e-05	LIM domain-containing protein WLIM1
CITRE_008g004010	0.993674274018843	0.000231929089176691	putative LOB domain-containing protein 38
CITRE_008g004340	-1.28731484295323	0.000186383790731629	Indole-3-acetic acid-amido synthetase GH3.3
CITRE_008g004380	0.988712460485493	0.000711797812096632	Indole-3-acetic acid-amido synthetase GH3.3
CITRE_008g005140	0.771948540974101	7.0749620414943e-07	Glycosyltransferase
CITRE_008g005260	0.553632487112689	0.000665207835016503	putative Wax ester synthase/diacylglycerol acyltransferase 11
CITRE_008g005580	0.797706655781281	1.7182476018326e-06	Ferredoxin--nitrite reductase%2C chloroplastic
CITRE_008g006000	3.00330917522808	3.62720785008997e-07	putative carboxylesterase 12
CITRE_008g006160	0.578713757735219	0.00211726837193895	putative carboxylesterase 5
CITRE_008g006820	1.93220093063396	1.20385256001533e-11	Fe2OG dioxygenase domain-containing protein
CITRE_008g007070	0.726259200871768	2.04387850189741e-06	conserved hypothetical protein
CITRE_008g007680	-1.57274983597499	4.8817323371951e-06	Cytochrome c biogenesis protein CCS1%2C chloroplastic
CITRE_008g008090	-2.75948975021619	6.93238917878085e-14	conserved hypothetical protein
CITRE_008g008290	-1.76343711475463	1.45145264696804e-05	conserved hypothetical protein
CITRE_008g009860	0.363497181887168	0.00191075676413612	Cysteine protease RD19A
CITRE_008g010330	-0.698699595023346	0.000727738757785266	Kinesin-like protein
CITRE_008g011760	1.7578386963932	1.71609368112482e-07	putative Proline-rich protein 4
CITRE_008g013300	-0.862806375149309	2.20626491718944e-13	putative Extra-large guanine nucleotide-binding protein 1
CITRE_008g014770	-1.15684769021781	0.000257253735736092	Protein EXORDIUM-like 2
CITRE_008g015030	0.662831676797624	2.20626491718944e-13	Glycosyltransferase
CITRE_008g019060	0.407376771440873	0.000695209118252635	HTH myb-type domain-containing protein
CITRE_008g019330	1.29173840897504	1.05160626560023e-06	putative Receptor kinase-like protein Xa21
CITRE_008g019340	0.952353184929807	6.02841008677308e-05	putative Leucine-rich repeat receptor protein kinase EMS1
CITRE_008g019440	-1.64712725831465	0.00253518018563977	ALOG domain-containing protein
CITRE_008g019860	0.512997340466428	0.000303785974417112	Ethylene receptor
CITRE_008g021260	-0.57374727912414	0.000387727799182564	Indole-3-acetaldehyde oxidase
CITRE_008g021980	0.975867409269306	1.37168186396295e-08	putative protein FAF-like%2C chloroplastic
CITRE_008g022460	-1.56448481228564	0.00276918834322638	LEA_2 domain-containing protein
CITRE_008g023230	0.370817840718786	0.00194257228064811	Capsanthin/capsorubin synthase%2C chromoplastic
CITRE_008g023670	0.70996296433953	0.000962115981512556	putative Ferredoxin-3%2C chloroplastic
CITRE_008g023690	1.93403430173815	4.98829104321211e-05	conserved hypothetical protein
CITRE_008g023900	1.09865175357243	4.76231777098308e-08	Beta-1%2C6-galactosyltransferase GALT29A
CITRE_008g024610	0.903653412574162	3.51948409118946e-07	conserved hypothetical protein
CITRE_008g026220	0.936718807999225	1.01192585102621e-05	Nodulin-like domain-containing protein
CITRE_008g026230	-0.616199572811903	0.00241704901634924	Exostosin domain-containing protein
CITRE_008g026470	-0.97290266687131	4.49667540486549e-07	Heavy metal-associated isoprenylated plant protein 3
CITRE_008g026550	-0.481932857575224	0.000340849036668403	ABC transporter domain-containing protein
CITRE_008g026600	-2.80482671130854	0.000173225701770415	MFS domain-containing protein
CITRE_008g026610	-2.67780161862061	3.01705270054434e-07	MFS domain-containing protein
CITRE_008g026800	-1.57766788836015	0.000310710677285451	conserved hypothetical protein
CITRE_008g027060	0.321332638430254	0.00165440522093993	putative protein-tyrosine sulfotransferase
CITRE_008g027280	-1.61927442164043	0.00038965510210194	PGG domain-containing protein
CITRE_008g027450	0.484740545611714	1.37637507905156e-06	F-box/kelch-repeat protein At5g60570
CITRE_008g027480	0.853632714994635	0.000310777012630175	putative pyridoxal 5'-phosphate synthase subunit PDX2
CITRE_008g027570	-2.11476470626323	5.05277549417055e-05	FAS1 domain-containing protein
CITRE_008g028570	-2.20099319150205	2.34979801827099e-05	Phototropin-1
CITRE_008g028930	0.810222447524413	3.83841550502394e-05	Exocyst subunit Exo70 family protein
CITRE_008g029090	-0.676895297182035	0.000710658993427656	Protein SOSEKI 5
CITRE_008g029420	1.39317622205214	7.10905633084662e-19	conserved hypothetical protein
CITRE_008g029700	-0.704831651014358	0.000315268881109154	RING-type domain-containing protein
CITRE_008g029720	-0.932043736605489	0.000425418151420391	conserved hypothetical protein
CITRE_008g029810	0.518982022973436	4.10647727675651e-05	conserved hypothetical protein
CITRE_008g029940	0.470959502600338	0.000897224615559651	Serine/threonine-protein kinase PCRK1
CITRE_008g030070	0.97147415355143	1.12382238032269e-16	putative Scarecrow-like protein 14
CITRE_008g030980	-0.827168346770375	0.000425418151420391	Copper transport protein
CITRE_008g032780	-2.096747217908	0.000502853809279839	Terpene cyclase/mutase family member
CITRE_009g000160	0.375539643796657	0.00100788704655533	putative Diacylglycerol O-acyltransferase 3
CITRE_009g000920	-1.3514132524794	0.000505946896992692	conserved hypothetical protein
CITRE_009g000940	0.360566625001781	1.92435392402155e-05	Beta-glucosidase-like SFR2%2C chloroplastic
CITRE_009g001120	-0.806412273875711	0.00132204883543706	Cas1_AcylT domain-containing protein
CITRE_009g001200	-1.0556996981631	0.00150040358772852	conserved hypothetical protein
CITRE_009g001380	-3.416258137226	2.00505608935001e-05	Galactinol--sucrose galactosyltransferase
CITRE_009g001680	0.846300222596092	3.51948409118946e-07	conserved hypothetical protein
CITRE_009g001870	-1.63633345351064	0.000815826041065111	Glyco_hydro_19_cat domain-containing protein
CITRE_009g001880	0.784298957102503	2.41562029522646e-09	Acetate--CoA ligase CCL3
CITRE_009g002700	-2.86389636520068	0.00222826168419866	conserved hypothetical protein
CITRE_009g002730	-2.06884733544295	0.0026860175750088	conserved hypothetical protein
CITRE_009g002800	-4.54050800341856	0.00534632904038453	conserved hypothetical protein
CITRE_009g002810	-2.79316834341281	1.01925279373752e-05	conserved hypothetical protein
CITRE_009g003510	1.27144221226009	6.74626734326434e-06	Flowering-promoting factor 1-like protein 3
CITRE_009g005110	1.15527742602636	0.00029982106869325	conserved hypothetical protein
CITRE_009g007210	0.434827599493086	1.49507153241407e-06	1%2C2-dihydroxy-3-keto-5-methylthiopentene dioxygenase
CITRE_009g007330	-0.861308339956672	0.00224826739251348	Protein argonaute 10
CITRE_009g007760	0.641463835856914	6.44390618679086e-06	Acylaminoacyl-peptidase
CITRE_009g007910	0.625779153994632	4.32997487477347e-09	Magnesium transporter
CITRE_009g008970	0.76426167174832	0.000344317964361356	Ethylene receptor
CITRE_009g010440	0.902238859999329	9.34458050934257e-08	Phosphate transporter PHO1
CITRE_009g010950	-1.26723492326803	0.000173462007559694	Arp2/3 complex 34 kDa subunit
CITRE_009g011650	-2.87642302443855	1.76091998134562e-10	(R%2CS)-reticuline 7-O-methyltransferase
CITRE_009g012340	0.944976521151558	0.000510845230985568	GST C-terminal domain-containing protein
CITRE_009g013830	0.492800451942397	0.0015042239412855	Purple acid phosphatase
CITRE_009g014470	1.15342883886014	1.94265397741876e-06	Protein SULFUR DEFICIENCY-INDUCED 2
CITRE_009g015030	0.4618839623022	0.00209474508335828	F-box domain-containing protein
CITRE_009g015180	-1.33206754793103	1.63304982074184e-05	conserved hypothetical protein
CITRE_009g017090	-0.580969628159543	4.13990451289807e-06	conserved hypothetical protein
CITRE_009g017240	0.628959870890595	0.000316696302591406	Selenium-binding protein 2
CITRE_009g018510	0.529256776481611	0.000289546331640922	Glutamine amidotransferase type-2 domain-containing protein
CITRE_009g018770	1.43477049255921	1.0488249514298e-06	Methyltransf_11 domain-containing protein
CITRE_009g018920	2.17088171550039	6.22143478926748e-05	putative Methyltransf_11 domain-containing protein
CITRE_009g019330	0.450903504211809	7.81939560700071e-05	putative calcium-binding protein CML36
CITRE_009g023730	-0.476206733096735	0.000140598274429942	Calcium-dependent protein kinase 32
CITRE_009g023970	0.298833727649203	0.000421818561226317	C3H1-type domain-containing protein
CITRE_009g023980	1.53670831789698	3.32480788817704e-12	Protein DETOXIFICATION
CITRE_009g024260	-2.11548344054867	0.000139655854446374	conserved hypothetical protein
CITRE_009g025820	0.637166520472664	0.000432341023635249	U-box domain-containing protein 35
CITRE_009g025850	0.461146301504638	6.87090076912058e-05	putative Uncharacterized Rho GTPase-activating protein At5g61530
CITRE_009g025900	0.647571413691537	9.67741872581029e-05	Hexose carrier protein HEX6
CITRE_009g026030	1.04983565650012	0.00222602825115749	MFS domain-containing protein
CITRE_009g026230	-1.22965948033414	0.000758545773303798	Protein kinase domain-containing protein
CITRE_009g026340	1.9255154591448	0.00268729866925169	Protein kinase domain-containing protein
CITRE_009g026410	1.01565853284522	0.000181837027919979	conserved hypothetical protein
CITRE_009g029230	-1.61804313060152	0.00128962719526343	HMA domain-containing protein
CITRE_009g029300	0.669181210747364	1.43630801186057e-09	Oxalate--CoA ligase
CITRE_009g029330	0.611637120498137	0.000430569491445201	putative DExH-box ATP-dependent RNA helicase DExH12
CITRE_009g030280	1.20562652666437	0.000282883402352266	conserved hypothetical protein
CITRE_009g030330	0.464040670575918	0.00109565877933437	Protein SAR DEFICIENT 4
CITRE_009g030600	0.793761925155581	1.97511471873801e-05	S-type anion channel SLAH3
CITRE_009g030680	0.679949104047216	0.000340849036668403	C2 domain-containing protein
CITRE_009g031190	0.90203383114522	0.00126833753938286	putative Cyclic nucleotide-gated ion channel 1
CITRE_009g032210	0.743736618797384	3.99704242893743e-05	Ent-kaurene synthase TSP4%2C chloroplastic
CITRE_009g032240	1.02138488555573	8.28082926923553e-10	Zinc transporter 1
CITRE_009g032560	-1.37686158960241	0.000737450377096639	conserved hypothetical protein
CITRE_012g000280	1.9723543184824	1.48211998249059e-05	hypothetical protein
CITRE_013g000550	1.07799299090798	3.98457744543585e-06	Epimerase domain-containing protein
CITRE_014g000180	-2.00156896262643	0.00127181350354262	hypothetical protein
CITRE_021g000220	0.511704602657387	0.000672115094844679	NB-ARC domain-containing disease resistance protein
CITRE_021g000320	-2.0578891998583	0.000266145867778971	conserved hypothetical protein
CITRE_024g000380	-1.94730433390381	5.50515332362489e-05	putative receptor-like protein kinase At2g42960
CITRE_025g000260	0.561647471897675	8.5706344831047e-05	conserved hypothetical protein
CITRE_032g000140	-2.01798745435267	0.000212450541037068	NB-ARC domain-containing disease resistance protein
CITRE_032g000190	-1.29419441039016	0.000727738757785266	conserved hypothetical protein
CITRE_056g000130	0.851154925219461	8.85628956270986e-06	Shikimate_dh_N domain-containing protein
CITRE_080g000080	-1.0745712134445	0.000836456231100662	Rac-like GTP-binding protein RAC2
CITRE_138g000020	2.11156155410551	0.000168881127920574	putative Copper/zinc superoxide dismutase
CITRE_143g000120	0.836791268186081	8.63667434949714e-05	Metallothionein-like protein type 3
CITRE_198g000030	-1.66754525097183	0.000895680851296655	putative UPF0481 protein At3g47200

## Sheet: CL ROOTS PLOIDY GENES
Gene	log2FoldChange	padj	annotation
CITRE_003g045640	4.29735581874992	0	conserved hypothetical protein
CITRE_003g045600	4.35121469587376	9.21901240934561e-158	conserved hypothetical protein
CITRE_003g045590	3.95262718067894	2.2081509046298e-131	conserved hypothetical protein
CITRE_003g045580	3.36269052405222	1.80809699035546e-74	conserved hypothetical protein
CITRE_003g011190	-3.72434835955995	1.09126219178325e-71	Agamous-like MADS-box protein AGL19
CITRE_003g045620	1.60879038780098	1.51268493439241e-70	conserved hypothetical protein
CITRE_004g010210	3.33101414417871	1.79259593624764e-68	putative Transposase
CITRE_004g015270	-2.14991315401552	5.3183923389619e-55	Expansin-like B1
CITRE_009g024520	-3.67180031087506	3.28525511566177e-48	3%2C9-dihydroxypterocarpan 6A-monooxygenase
CITRE_005g027780	-4.36736885182929	2.3243588514262e-43	MADS-box protein JOINTLESS
CITRE_005g021470	-11.2139751993539	3.60202533314879e-39	conserved hypothetical protein
CITRE_008g027990	3.94870139111712	1.96615460491766e-34	Hypothetical protein
CITRE_005g024740	-4.43272832029861	2.56947513041016e-30	GUB_WAK_bind domain-containing protein
CITRE_006g027060	-1.53917276763333	3.24092490225228e-27	Agamous-like MADS-box protein FUL-L
CITRE_007g007610	0.79077933480329	5.69469340018176e-26	Phosphoenolpyruvate carboxykinase (ATP)
CITRE_009g022710	2.4429829886616	4.18256165261418e-24	Protein kinase domain-containing protein
CITRE_009g022680	-0.78999104276805	1.95413744687792e-23	conserved hypothetical protein
CITRE_007g015880	-2.58210567588272	3.21903504134432e-23	Fe2OG dioxygenase domain-containing protein
CITRE_005g021120	8.62900732777038	2.44197697577325e-22	Hypothetical protein
CITRE_001g035360	-0.858478597152975	1.56186636019884e-21	putative Homeobox protein knotted-1-like LET12
CITRE_001g010270	1.03631872315002	1.85523288186727e-21	conserved hypothetical protein
CITRE_009g030300	0.968185132510389	2.9863070017321e-21	putative DUF21 domain-containing protein At5g52790
CITRE_007g021880	1.10853336964734	6.94731929786995e-21	Vacuolar cation/proton exchanger
CITRE_001g003680	2.05266466345867	8.10106420563408e-21	FAD_binding_3 domain-containing protein
CITRE_007g015970	-2.12849945553608	8.10106420563408e-21	Fe2OG dioxygenase domain-containing protein
CITRE_004g030700	2.92059004775897	3.60938700311176e-20	putative UDP-glycosyltransferase 74B1
CITRE_003g045660	1.59540206354376	1.06118078530659e-17	conserved hypothetical protein
CITRE_001g001960	0.913982105827101	1.84090344146112e-17	Brassinosteroid-related acyltransferase 1
CITRE_011g001120	-1.58050250838116	4.16532197832255e-17	putative disease resistance protein RGA3
CITRE_011g001130	-1.08546767423921	1.68144667586849e-16	putative NB-ARC domain-containing protein
CITRE_003g045570	0.722796359495255	4.41012253824466e-16	conserved hypothetical protein
CITRE_003g032000	0.874146338239076	9.76653826613772e-16	TIR domain-containing protein
CITRE_005g002790	3.25930403843372	3.692506152614e-15	Hypothetical protein
CITRE_002g026970	-1.05848478608864	1.66382224726623e-14	Bet_v_1 domain-containing protein
CITRE_007g016050	0.848386301509666	2.24392580497903e-14	Pleiotropic drug resistance protein 1
CITRE_003g045650	1.6318304480594	3.22218364673829e-14	conserved hypothetical protein
CITRE_002g036960	-0.382729484771747	3.95454867116478e-14	Protein IQ-DOMAIN 9
CITRE_003g032550	1.53165982509076	6.7460050681305e-14	putative Disease resistance-like protein DSC1
CITRE_003g040460	0.893266150202615	1.1211482404004e-13	TIR domain-containing protein
CITRE_042g000180	1.42933209564485	1.22469259858629e-13	NB-ARC domain-containing protein
CITRE_003g050740	6.83080888359871	1.52966017562194e-13	Hypothetical protein
CITRE_006g006140	-0.876610872903961	1.85537065284669e-13	ULP_PROTEASE domain-containing protein
CITRE_007g002590	1.30910111610099	1.85537065284669e-13	Protein SHI RELATED SEQUENCE 1
CITRE_009g030310	1.06004595640732	2.28163398231886e-13	putative DUF21 domain-containing protein At5g52790
CITRE_006g021410	-1.76454731042408	3.58721150099824e-13	Cytochrome P450 94C1
CITRE_003g032560	1.61729157416099	3.6647078386932e-13	putative TMV resistance protein N
CITRE_005g020270	-1.11508958837468	6.40887883921647e-13	conserved hypothetical protein
CITRE_008g026590	-3.25409797563044	7.07586366057302e-13	MFS domain-containing protein
CITRE_006g002530	1.95614757491479	1.04874730758949e-12	putative AP2-like ethylene-responsive transcription factor BBM1
CITRE_005g004390	-1.08862363133395	1.88879572855242e-12	FAD-binding PCMH-type domain-containing protein
CITRE_006g021400	-1.51588777292395	1.88879572855242e-12	Cytochrome P450 94C1
CITRE_007g015890	-2.46837142697518	4.58821605801261e-12	Fe2OG dioxygenase domain-containing protein
CITRE_007g031670	-1.39189018851128	6.16695597963093e-12	putative Cytochrome P450 71AU50
CITRE_003g040450	0.972017428462214	6.42365108678907e-12	putative TIR domain-containing protein
CITRE_003g051750	2.06889491278011	6.71268290614015e-12	conserved hypothetical protein
CITRE_002g003140	-1.29575847108787	7.46455766827724e-12	putative Flavonoid 3'-monooxygenase
CITRE_003g032440	1.52070518079028	7.46455766827724e-12	conserved hypothetical protein
CITRE_003g049410	1.1445768239436	1.45486738911176e-11	Glutathione gamma-glutamylcysteinyltransferase
CITRE_003g035060	-1.29310633635042	2.77360691522405e-11	C-JID domain-containing protein
CITRE_004g010320	-0.819252386143703	2.89631807585615e-11	conserved hypothetical protein
CITRE_003g032480	1.59389433001904	2.95943682725878e-11	putative TMV resistance protein N
CITRE_003g045460	0.94110066247403	3.14724264965257e-11	conserved hypothetical protein
CITRE_009g022670	-0.821928579779695	3.14724264965257e-11	NB-ARC domain-containing disease resistance protein
CITRE_004g024480	-2.60003389807476	3.57753160137111e-11	Protein NRT1/ PTR FAMILY 3.1
CITRE_003g060660	-4.84561353298159	4.40431207187172e-11	SOC1-like protein 1
CITRE_009g023700	1.46378115642341	5.01383678403553e-11	Polygalacturonase
CITRE_008g004850	0.857013725184319	7.83039280762513e-11	Protein kinase domain-containing protein
CITRE_003g035050	-1.77895582259581	7.94440446277902e-11	putative Disease resistance protein RPV1
CITRE_004g003700	1.28202441987068	1.56792452642367e-10	conserved hypothetical protein
CITRE_004g011900	-1.47902542451396	1.62807057511288e-10	Str_synth domain-containing protein
CITRE_005g004400	-0.972158658762226	1.64561683892711e-10	FAD-binding PCMH-type domain-containing protein
CITRE_003g031320	-0.640413787320202	2.11772291409929e-10	Protein DETOXIFICATION 14
CITRE_015g000040	0.424069187905762	2.34374288254442e-10	ADP-ribosyl cyclase/cyclic ADP-ribose hydrolase
CITRE_002g033450	1.38553071322196	2.37465997049444e-10	conserved hypothetical protein
CITRE_007g027910	0.777692846983205	2.72579794632463e-10	putative Stemmadenine O-acetyltransferase
CITRE_002g014760	-0.855667249494019	4.20881547980575e-10	SHSP domain-containing protein
CITRE_003g032510	1.95168952905325	4.46272586711869e-10	putative TIR domain-containing protein
CITRE_003g046860	0.69871521683001	5.65065855523086e-10	Protein QUIRKY
CITRE_009g001320	-0.871801931817251	5.72623853732353e-10	conserved hypothetical protein
CITRE_004g022600	0.452662988740035	7.60634502808952e-10	conserved hypothetical protein
CITRE_014g000300	1.83808601085597	8.18703375044618e-10	conserved hypothetical protein
CITRE_003g007900	-0.43911023879507	1.27956615055542e-09	FLZ-type domain-containing protein
CITRE_003g030330	-2.15580928744471	1.62288325367481e-09	putative Caffeic acid 3-O-methyltransferase
CITRE_009g031360	0.578803018355358	1.668982682874e-09	Cyclic nucleotide-binding domain-containing protein
CITRE_008g006310	-2.14344760528603	1.78386682171950e-09	Phytocyanin domain-containing protein
CITRE_005g029010	1.6073138119842	1.82110547133744e-09	Protein kinase domain-containing protein
CITRE_010g001270	-1.1891245827676	2.08056301421836e-09	NB-ARC domain-containing protein
CITRE_007g000620	2.2992971482647	2.11249753903569e-09	Hypothetical protein
CITRE_007g030730	-0.56617710207103	2.60784586215963e-09	Caffeic acid 3-O-methyltransferase
CITRE_005g014090	2.17358545528568	2.72900012018339e-09	F-box domain-containing protein
CITRE_002g005250	0.89331932552872	3.63828493855918e-09	Protein kinase domain-containing protein
CITRE_001g000950	-0.923702636037216	3.85071558334962e-09	Sarcosine oxidase
CITRE_003g011230	-1.46671174498378	3.93608509044545e-09	Protein kinase domain-containing protein
CITRE_006g009540	-0.297547245650101	4.57598554909323e-09	Pectate lyase
CITRE_002g039350	-0.54371020661698	8.9217465152828e-09	conserved hypothetical protein
CITRE_006g019800	0.455773045441687	9.41606723530243e-09	Protein kinase domain-containing protein
CITRE_001g026000	-0.67174633054811	1.05210583255869e-08	conserved hypothetical protein
CITRE_001g031910	-0.848990337109451	1.11433298350048e-08	conserved hypothetical protein
CITRE_008g006280	-2.30064184352647	1.11433298350048e-08	Phytocyanin domain-containing protein
CITRE_007g027190	-1.27557227630656	1.1782034425482e-08	NAC domain-containing protein
CITRE_009g014720	1.10369358653474	1.1782034425482e-08	conserved hypothetical protein
CITRE_005g038950	0.972824501274398	1.31269659744473e-08	GDSL esterase/lipase EXL3
CITRE_003g030980	-1.3102771713511	1.39299337966425e-08	hypothetical protein
CITRE_007g030710	-0.618495078146215	1.39299337966425e-08	Caffeic acid 3-O-methyltransferase
CITRE_008g002240	-1.19780762066427	1.42804321477022e-08	Nodulin-like domain-containing protein
CITRE_005g015800	0.926915566136334	1.59078881850324e-08	putative ULP_PROTEASE domain-containing protein
CITRE_002g008550	0.632307699156876	1.62445098168078e-08	LOB domain-containing protein
CITRE_003g038160	0.454194711486619	1.97221163289709e-08	BTB/POZ and TAZ domain-containing protein 3
CITRE_003g042240	-0.44632494293527	2.03899013470792e-08	putative RING-type domain-containing protein
CITRE_005g037970	-1.43907844964275	2.63383972470362e-08	Agamous-like MADS-box protein AP3
CITRE_007g020970	-2.69111012563132	3.11166441716039e-08	Heat shock protein 70 family
CITRE_005g037680	-0.436667376503226	3.13474865995265e-08	Homeobox domain-containing protein
CITRE_006g000510	0.44581022873581	3.47665013005541e-08	putative protein NRT1/ PTR FAMILY 4.3
CITRE_005g018150	-1.37257524830308	4.13173756301619e-08	Fe2OG dioxygenase domain-containing protein
CITRE_002g029580	-0.561212973136911	4.3306793839002e-08	Protein kinase domain-containing protein
CITRE_003g007090	1.33133125815556	4.3769715292025e-08	Adenine/guanine permease AZG2
CITRE_015g000140	0.79080936025499	5.35912280933467e-08	putative phosphoinositide phosphatase SAC9
CITRE_007g027920	0.662511747078322	5.59352481223742e-08	putative (13S%2C14R)-1%2C13-dihydroxy-N-methylcanadine 13-O-acetyltransferase AT1
CITRE_009g000110	-0.46797987631767	5.60907374100487e-08	conserved hypothetical protein
CITRE_006g011550	0.505903515115738	7.2966811877848e-08	BHLH domain-containing protein
CITRE_031g000020	-3.63876086457014	7.2966811877848e-08	LRRNT_2 domain-containing protein
CITRE_004g023100	0.890105519124308	7.67942202999871e-08	conserved hypothetical protein
CITRE_001g016640	0.793112261900596	8.29286615119719e-08	bHLH-MYC_N domain-containing protein
CITRE_007g032660	0.864162692586914	8.62219554679184e-08	HMA domain-containing protein
CITRE_004g025750	-0.397710061840105	9.35561987942124e-08	conserved hypothetical protein
CITRE_008g006960	0.675048850338645	9.37047607749368e-08	conserved hypothetical protein
CITRE_009g021150	-1.02719936242814	9.5420778423319e-08	putative Receptor-like protein EIX1
CITRE_001g030130	-0.667820367180365	1.00723315539491e-07	putative UDP-N-acetylglucosamine transporter UGNT1
CITRE_008g015150	1.21478629459329	1.00723315539491e-07	Glycosyltransferase
CITRE_001g031180	-0.992495136488375	1.12006146076387e-07	FLZ-type domain-containing protein
CITRE_014g000290	1.72008928546789	1.12006146076387e-07	conserved hypothetical protein
CITRE_007g011450	0.621986286695811	1.25658613152156e-07	conserved hypothetical protein
CITRE_004g015970	0.920552865752852	1.3020028751295e-07	DUF4408 domain-containing protein
CITRE_009g020960	-1.40682163247587	1.31666692667129e-07	LRRNT_2 domain-containing protein
CITRE_002g033880	0.989062236607052	1.39533170896766e-07	NTF2 domain-containing protein
CITRE_009g014930	0.707267105198173	1.42547126852267e-07	conserved hypothetical protein
CITRE_005g029100	-0.631359809279064	1.4465152448667e-07	VQ domain-containing protein
CITRE_003g009190	-1.47615621643403	1.65630232261447e-07	Hypothetical protein
CITRE_004g001380	0.642516680081854	1.75368004092525e-07	putative aquaporin PIP1-4
CITRE_007g027430	0.534934765208919	1.94119419548068e-07	conserved hypothetical protein
CITRE_007g014230	0.366045681715917	2.57217827944512e-07	Mitochondrial arginine transporter BAC2
CITRE_004g000870	-0.616391807936701	2.80945541781209e-07	ATPase_AAA_core domain-containing protein
CITRE_003g052780	1.03890629952878	2.93201198918272e-07	Short-chain dehydrogenase reductase 2a
CITRE_009g031480	-1.59398821357128	3.15964785163564e-07	Cyclic nucleotide-binding domain-containing protein
CITRE_007g029100	-0.905401966696764	3.46869537274339e-07	RING-type E3 ubiquitin transferase
CITRE_008g005390	0.381044576520327	3.58984007940366e-07	Protein kinase domain-containing protein
CITRE_002g026990	-1.20004357021428	3.62060270445666e-07	Bet_v_1 domain-containing protein
CITRE_009g009580	-0.895363558187069	3.97719882556923e-07	Glutathione transferase
CITRE_001g007060	-0.35955829512428	4.21073732209758e-07	conserved hypothetical protein
CITRE_003g032520	1.32023938377068	4.23548963803301e-07	conserved hypothetical protein
CITRE_003g033830	0.658612049784997	4.34040780949185e-07	ADP-ribosyl cyclase/cyclic ADP-ribose hydrolase
CITRE_024g000300	1.45800364196156	4.52532296298466e-07	Protein kinase domain-containing protein
CITRE_005g017100	0.569330782425628	4.68981188753501e-07	Polyamine transporter RMV1
CITRE_008g027770	-0.311614560484321	4.71506524235731e-07	conserved hypothetical protein
CITRE_002g028110	-0.473874440097546	4.86771865964854e-07	Amino-acid permease BAT1
CITRE_002g003220	-0.449274733740137	4.93540264190246e-07	conserved hypothetical protein
CITRE_004g032210	-0.508037670992321	5.35357841645797e-07	GMC_OxRdtase_N domain-containing protein
CITRE_005g024010	-1.14595766160201	5.35357841645797e-07	conserved hypothetical protein
CITRE_008g003710	0.79681973702599	6.00057262861054e-07	Protein NRT1/ PTR FAMILY 1.2
CITRE_001g019410	-1.07662392514923	6.04311601193194e-07	putative G-type lectin S-receptor-like serine/threonine-protein kinase SD1-1
CITRE_005g013270	-1.1860008412845	6.92005295861502e-07	putative Receptor-like protein 54
CITRE_007g024720	-2.75745316255469	7.15460458235677e-07	Cationic peroxidase 1
CITRE_002g009150	-0.604018025121115	7.37887568954178e-07	conserved hypothetical protein
CITRE_002g031150	-3.21364863222928	7.50717309572972e-07	Fe(2+) transport protein 1
CITRE_003g020560	-0.33313569088631	7.83618140428275e-07	Fe2OG dioxygenase domain-containing protein
CITRE_007g003020	0.790063679820183	7.90708338216703e-07	conserved hypothetical protein
CITRE_008g008270	1.12340391435555	8.03824257208469e-07	putative Organ-specific protein S2
CITRE_064g000110	1.94903833826521	8.04343017732805e-07	Peroxidase
CITRE_009g020940	-1.26235391357126	8.25877129065262e-07	putative Receptor-like protein EIX1
CITRE_003g005240	-0.289964099717888	8.53451093757995e-07	TPR_MalT domain-containing protein
CITRE_003g037470	-1.0170218338885	8.53776976833882e-07	2-alkenal reductase (NADP(+)-dependent)
CITRE_009g020510	-1.28698894174786	9.03966439845854e-07	Hypothetical protein
CITRE_005g035830	4.47941035058305	9.06924769954547e-07	conserved hypothetical protein
CITRE_002g026070	0.968829044943982	9.49364682998632e-07	Vacuolar iron transporter 1
CITRE_004g032340	-0.649264289200976	9.7494879880705e-07	Casparian strip membrane protein 3
CITRE_005g012690	-0.754747958248422	1.05736958421674e-06	WAT1-related protein
CITRE_004g003370	-0.747004106258126	1.06298890242842e-06	Cytochrome P450 82A3
CITRE_009g018540	-0.795966115053492	1.10213466099613e-06	BHLH domain-containing protein
CITRE_031g000340	0.867668626645964	1.16946024282668e-06	putative Glucose-6-phosphate 1-dehydrogenase
CITRE_002g000630	-1.8735398210934	1.20701418436797e-06	putative Protochlorophyllide-dependent translocon component 52%2C chloroplastic
CITRE_009g012260	-1.74177770508115	1.21866074887544e-06	putative glutathione S-transferase
CITRE_007g033390	-0.634554321716288	1.24194478632665e-06	C2 domain-containing protein
CITRE_031g000350	0.465763412725099	1.44402175267767e-06	Glucose-6-phosphate 1-dehydrogenase%2C chloroplastic
CITRE_005g027160	-2.09393669226692	1.75930521944253e-06	conserved hypothetical protein
CITRE_003g055690	-0.20870400726714	2.06057997143807e-06	ADP-ribosylation factor 2
CITRE_004g011880	-0.355929728832389	2.14423231913976e-06	conserved hypothetical protein
CITRE_004g017930	-1.05762046188525	2.25008695096428e-06	3%2C9-dihydroxypterocarpan 6A-monooxygenase
CITRE_003g043360	0.91454605653115	2.31876969102599e-06	Beta-amyrin 28-monooxygenase
CITRE_007g006580	0.439573580054172	2.31876969102599e-06	BTB/POZ domain-containing protein NPY2
CITRE_009g031300	0.533246389763282	2.53706983231473e-06	Trehalose 6-phosphate phosphatase
CITRE_006g026000	-0.861209407109829	2.5678331963594e-06	Rhomboid domain-containing protein
CITRE_005g020430	-1.62155784438671	2.57316571080605e-06	putative Cysteine-rich receptor-like protein kinase 10
CITRE_008g018480	1.84698043246439	2.62888608101534e-06	Peroxidase
CITRE_008g032900	0.64906980036811	2.6407665162391e-06	conserved hypothetical protein
CITRE_009g032530	-0.274256926649607	2.74326803972324e-06	Succinate-semialdehyde dehydrogenase
CITRE_005g006400	-0.851291234363735	2.87070487184381e-06	putative Disease resistance protein Roq1
CITRE_005g018920	0.995882027241597	2.92514742604317e-06	Perakine reductase
CITRE_007g014870	0.600024646010156	3.00995887085996e-06	conserved hypothetical protein
CITRE_001g018700	-0.863993044998692	3.16155429472095e-06	conserved hypothetical protein
CITRE_005g002420	0.721753287919192	3.16155429472095e-06	Hypothetical protein
CITRE_003g009360	0.773195982335157	3.23270483303536e-06	conserved hypothetical protein
CITRE_008g007430	-0.363743199719938	3.38063248036943e-06	RING-type E3 ubiquitin transferase
CITRE_003g045420	1.18502439894228	3.48119160279694e-06	conserved hypothetical protein
CITRE_005g008230	0.729851728866148	3.48119160279694e-06	Loganic acid O-methyltransferase
CITRE_008g005600	-1.48546956538137	3.53921454711782e-06	ABA 8'-hydroxylase
CITRE_004g000350	-0.624210468501924	3.58585774279105e-06	Glycosyltransferase
CITRE_001g001100	1.20233604833898	3.83046569643888e-06	Glutamate receptor 2.7
CITRE_009g017360	-0.486712129424765	3.83046569643888e-06	Glycosyltransferase
CITRE_001g030240	-0.179852413132042	4.30476106521267e-06	ENTH domain-containing protein
CITRE_003g026150	-0.869133691264221	4.42802098172937e-06	UNC93-like protein 2
CITRE_007g004110	1.30234209915252	4.56797034556726e-06	Hypothetical protein
CITRE_003g030530	-0.6598343509523	4.63964037298682e-06	putative Caffeic acid 3-O-methyltransferase
CITRE_008g025690	-0.569956925371345	4.74864570772062e-06	putative serine protease EDA2
CITRE_008g008920	0.787312653547286	4.75990483595782e-06	NmrA domain-containing protein
CITRE_006g011540	0.471668179445376	4.86283377259663e-06	conserved hypothetical protein
CITRE_004g030420	-0.540012800100251	4.94641887627839e-06	WAT1-related protein
CITRE_002g021940	1.39481516548481	5.08902802900711e-06	putative Transcriptional regulator STERILE APETALA
CITRE_006g011310	-1.49207443933183	5.130948442258e-06	Tropinone reductase
CITRE_005g005200	0.434532549297181	5.1700834910639e-06	putative Histone H2B.3
CITRE_007g008730	0.796392331727834	5.2711146043594e-06	Cellulase domain-containing protein
CITRE_009g026500	0.834744545492336	5.2711146043594e-06	putative Structural maintenance of chromosomes protein 2-1
CITRE_003g044280	-0.59662362423822	5.41027924726104e-06	Anthranilate N-methyltransferase
CITRE_005g014000	-1.00068246068823	5.46435199189567e-06	putative 3-oxo-Delta(4%2C5)-steroid 5-beta-reductase
CITRE_006g026770	-1.29768511981972	5.46435199189567e-06	conserved hypothetical protein
CITRE_009g001930	-0.608937657920095	5.53839352041674e-06	Acetate--CoA ligase CCL3
CITRE_003g016030	-1.42559799944275	5.56802457349364e-06	BHLH domain-containing protein
CITRE_059g000200	1.05495044875514	5.56802457349364e-06	Phenylacetaldehyde oxime monooxygenase CYP71AN24
CITRE_004g018590	-0.53848773273598	5.61712008548157e-06	NAC domain-containing protein
CITRE_002g036790	-0.484290964291691	5.67759213113873e-06	AP2/ERF domain-containing protein
CITRE_007g005000	2.4372515631204	5.98177816588513e-06	conserved hypothetical protein
CITRE_001g011200	-1.58009826758117	6.34777158556718e-06	R2R3-MYB transcription factor 68
CITRE_003g028350	-0.547510688119955	6.79719083125539e-06	Hypothetical protein
CITRE_008g032260	1.77881010143698	6.9213598650514e-06	conserved hypothetical protein
CITRE_007g014890	0.721906011753343	6.98652504628475e-06	putative Coatomer subunit beta'-2
CITRE_008g021490	0.489176206292119	6.98652504628475e-06	Abhydrolase_3 domain-containing protein
CITRE_008g029080	-0.44759679465524	7.19148415540429e-06	conserved hypothetical protein
CITRE_006g009290	-0.589999241455394	7.47705447428366e-06	Very-long-chain aldehyde decarbonylase CER1
CITRE_007g008450	0.717138266240854	7.5086481175636e-06	Mitochondrial uncoupling protein 5
CITRE_002g030470	0.403834681853981	8.04918130125565e-06	PGG domain-containing protein
CITRE_005g015000	1.60368946136951	8.55383196036106e-06	conserved hypothetical protein
CITRE_001g014880	0.305845753988984	8.65821248868818e-06	Protein kinase domain-containing protein
CITRE_004g008500	-0.677309586577105	8.76721118124816e-06	GDSL esterase/lipase At2g30310
CITRE_003g045780	-1.01796112641596	8.77226521006604e-06	NAC domain-containing protein
CITRE_008g025550	-0.790431553600897	8.8001005624016e-06	conserved hypothetical protein
CITRE_008g004870	0.759136814789515	9.0158147057229e-06	putative LRR receptor-like serine/threonine-protein kinase At4g37250
CITRE_004g001360	-1.81676563009778	9.42768288513578e-06	7-methylxanthine methyltransferase 1
CITRE_015g000340	0.730503016567425	1.01063431316723e-05	ADP-ribosyl cyclase/cyclic ADP-ribose hydrolase
CITRE_003g022340	-0.316996581439295	1.0489597901383e-05	NAC domain-containing protein
CITRE_008g009190	0.813523626859691	1.0489597901383e-05	AAA domain-containing protein
CITRE_001g032370	0.544589937434767	1.07896994910639e-05	AP2-like ethylene-responsive transcription factor AIL5
CITRE_007g008820	-0.309204106366508	1.11632848325542e-05	Homeobox domain-containing protein
CITRE_001g032950	-0.389111029930975	1.15052185912125e-05	Bifunctional dethiobiotin synthetase/7%2C8-diamino-pelargonic acid aminotransferase%2C mitochondrial
CITRE_007g028070	0.655731156361923	1.19515929980086e-05	putative Stemmadenine O-acetyltransferase
CITRE_003g011020	-1.51326631577157	1.24262441359839e-05	BHLH domain-containing protein
CITRE_006g008660	-1.22601380728033	1.2647921689086e-05	L-ascorbate peroxidase
CITRE_007g016170	-0.309298250654895	1.26770744756058e-05	Hydrolase_4 domain-containing protein
CITRE_008g022890	0.943748762332094	1.28762749317065e-05	conserved hypothetical protein
CITRE_003g043840	-0.632236153789403	1.29816181338926e-05	UDP-glycosyltransferase 76B1
CITRE_008g020090	-0.949803216031387	1.29816181338926e-05	putative LRR receptor-like serine/threonine-protein kinase At1g53430
CITRE_001g033170	1.14631118795028	1.30047437974795e-05	Glutamate receptor
CITRE_004g001720	-0.441662495084878	1.30047437974795e-05	HMG box domain-containing protein
CITRE_001g018320	-0.260586362038741	1.30939000690073e-05	Arf-GAP domain-containing protein
CITRE_001g015790	-0.580237059680868	1.36114110583698e-05	TCP domain-containing protein
CITRE_003g026260	-1.26479760822931	1.36114110583698e-05	hypothetical protein
CITRE_005g008240	0.660797930139382	1.36114110583698e-05	S-adenosyl-L-methionine-dependent methyltransferase superfamily protein
CITRE_009g020920	-0.843219024737074	1.39642711661802e-05	putative Receptor-like protein EIX2
CITRE_002g005950	0.642623295778036	1.4306584808074e-05	putative protein LATERAL ROOT PRIMORDIUM 1
CITRE_005g008210	0.854704710609488	1.43133608950063e-05	Loganic acid O-methyltransferase
CITRE_005g030930	-0.283227496161183	1.43133608950063e-05	DNA-(apurinic or apyrimidinic site) lyase
CITRE_005g018950	-0.376860777880843	1.43293441677313e-05	Aldo_ket_red domain-containing protein
CITRE_008g003660	0.594207464120597	1.43293441677313e-05	putative protein NRT1/ PTR FAMILY 1.2
CITRE_003g048420	1.32447868841102	1.44862948177625e-05	Protein kinase domain-containing protein
CITRE_001g005400	-0.851505364099032	1.48368402456251e-05	Auxin-responsive protein
CITRE_004g029610	-0.924745825690724	1.52643361310225e-05	MFS domain-containing protein
CITRE_064g000190	2.02089645797096	1.52643361310225e-05	Peroxidase
CITRE_001g008760	-0.254938322355121	1.57518540611529e-05	Aldedh domain-containing protein
CITRE_007g006900	0.397075732924197	1.73444173225035e-05	Protein SHORT-ROOT
CITRE_008g016820	0.882523981040412	1.84794199784452e-05	EXPERA domain-containing protein
CITRE_003g057670	1.08421600221864	1.86386226972871e-05	Aluminum-activated malate transporter 10
CITRE_003g021000	-1.18729069332862	1.92833549588191e-05	putative Cytochrome P450 CYP72A219
CITRE_005g006590	0.787453876060484	1.95646109591574e-05	putative Disease resistance-like protein DSC1
CITRE_009g032340	-0.310393720816943	1.97839062352797e-05	putative Defective in cullin neddylation protein
CITRE_009g014970	0.531089672366633	2.07401898004881e-05	F-box domain-containing protein
CITRE_007g012910	2.1186408652437	2.0826610635243e-05	Protein kinase domain-containing protein
CITRE_003g032400	0.609406347475227	2.08555449868491e-05	putative ADP-ribosyl cyclase/cyclic ADP-ribose hydrolase
CITRE_009g023090	-1.21100016001878	2.08555449868491e-05	Protein kinase domain-containing protein
CITRE_009g011750	-0.920887444579665	2.08831229390355e-05	conserved hypothetical protein
CITRE_003g061240	-0.877278608222583	2.11275712241055e-05	conserved hypothetical protein
CITRE_008g007650	1.04398671023706	2.11275712241055e-05	conserved hypothetical protein
CITRE_003g043000	-0.956571496023461	2.1267915368599e-05	conserved hypothetical protein
CITRE_002g015290	0.677459491774371	2.24567281701472e-05	Aminotran_1_2 domain-containing protein
CITRE_002g007750	-0.384748397284946	2.25404390835887e-05	Formate dehydrogenase%2C mitochondrial
CITRE_004g003330	-0.773886295947522	2.25404390835887e-05	conserved hypothetical protein
CITRE_004g025480	0.366220717986641	2.45750667449313e-05	CYTH domain-containing protein
CITRE_005g031390	-0.681860130437635	2.45750667449313e-05	putative calcium-binding protein CML44
CITRE_004g014380	0.521621475181706	2.46306318804723e-05	NAC domain-containing protein
CITRE_002g032240	1.40542942130677	2.4889581340413e-05	FAD-binding PCMH-type domain-containing protein
CITRE_005g034980	0.823335164524643	2.51410373292278e-05	Protein kinase domain-containing protein
CITRE_002g000080	-0.193184788778189	2.56255917594239e-05	conserved hypothetical protein
CITRE_003g009010	0.385853396033495	2.56255917594239e-05	conserved hypothetical protein
CITRE_009g000690	0.182315249321237	2.56255917594239e-05	YTH domain-containing protein
CITRE_002g037410	-0.464638989773807	2.56405116957785e-05	ALOG domain-containing protein
CITRE_008g025760	-0.561959030209168	2.58724509984697e-05	putative serine protease EDA2
CITRE_007g019380	1.19737828740944	2.6380683319936e-05	conserved hypothetical protein
CITRE_009g021130	-0.962053588273917	2.7777367171966e-05	putative Receptor-like protein EIX1
CITRE_009g029830	0.860999724275243	2.9178335610541e-05	Coumarin 8-geranyltransferase 1b%2C chloroplastic
CITRE_002g026680	-0.466428288962637	2.91895824327504e-05	Bet_v_1 domain-containing protein
CITRE_003g023300	-0.810608348549898	2.91895824327504e-05	putative Thiamine thiazole synthase%2C chloroplastic
CITRE_003g054220	1.08577749698249	2.94601922221462e-05	putative pectinesterase/pectinesterase inhibitor 7
CITRE_006g022880	0.398036633553074	2.96663171291989e-05	RING-type domain-containing protein
CITRE_011g000510	-0.781248708735331	3.01108545720381e-05	putative NB-ARC domain-containing protein
CITRE_008g006300	-2.03864708583546	3.04882807257086e-05	Phytocyanin domain-containing protein
CITRE_005g035350	-0.226142229573883	3.06785404191681e-05	conserved hypothetical protein
CITRE_001g002860	-0.590541907068756	3.1900347110368e-05	conserved hypothetical protein
CITRE_004g020670	0.19727049034182	3.1900347110368e-05	MLO-like protein 1
CITRE_009g021160	-0.936498996235095	3.30458869982911e-05	putative Receptor-like protein EIX2
CITRE_003g022280	-0.697091544908722	3.31269184218472e-05	conserved hypothetical protein
CITRE_003g034570	-0.795125960420475	3.40832502903831e-05	Protein NRT1/ PTR FAMILY 4.4
CITRE_007g006690	-0.448309328628874	3.48138369099606e-05	conserved hypothetical protein
CITRE_006g013110	0.347643322840885	3.63995649009896e-05	Transcription factor DIVARICATA
CITRE_003g012830	0.375232931615896	3.64203351767012e-05	Heparanase-like protein 1
CITRE_007g025850	-0.290606765709933	3.71278011281519e-05	Filament-like plant protein 3
CITRE_005g002100	-0.712026672148674	3.90169367778011e-05	putative glutamyl endopeptidase%2C chloroplastic
CITRE_001g034350	0.420446572444675	3.969364433528e-05	Shikimate O-hydroxycinnamoyltransferase
CITRE_008g007660	0.797274104581671	3.969364433528e-05	4-hydroxy-3-methylbut-2-enyl diphosphate reductase%2C chloroplastic
CITRE_015g000120	0.774644601494052	3.969364433528e-05	putative phosphoinositide phosphatase SAC9
CITRE_002g022510	-0.618604176433957	4.01435160790363e-05	Nuclear factor Y%2C subunit B3
CITRE_001g005980	0.353165193379896	4.08945262737085e-05	Hypothetical protein
CITRE_001g026480	-0.301705511135062	4.12786308519207e-05	Cellulose synthase-like protein E1
CITRE_006g027010	-0.525769777273057	4.12786308519207e-05	conserved hypothetical protein
CITRE_002g037530	-0.607748016983265	4.18503455953352e-05	Non-specific serine/threonine protein kinase
CITRE_008g001530	1.19184892549213	4.36497298265067e-05	putative protein ALTERED PHOSPHATE STARVATION RESPONSE 1
CITRE_007g028410	-0.38075520276574	4.44641231186261e-05	conserved hypothetical protein
CITRE_096g000050	-0.375652617658006	4.65383122080803e-05	NB-ARC domain-containing disease resistance protein
CITRE_003g055110	0.424895019838153	4.68271354687782e-05	conserved hypothetical protein
CITRE_007g004250	-0.398319107346377	4.68271354687782e-05	Homeobox domain-containing protein
CITRE_005g034090	0.59849627089582	4.69598797272979e-05	FHA domain-containing protein
CITRE_005g019160	0.66208065922251	4.75514772732956e-05	Hydroxycinnamoyl-CoA shikimate/quinate hydroxycinnamoyl transferase
CITRE_006g024800	0.852864262538096	4.76087663556941e-05	RING-type E3 ubiquitin transferase
CITRE_058g000040	-0.532864806004532	4.91377207658052e-05	Glutathione transferase
CITRE_004g027660	-0.557912108846445	5.01932761879072e-05	conserved hypothetical protein
CITRE_006g024880	0.82561181012042	5.15240734179101e-05	conserved hypothetical protein
CITRE_002g034140	0.395562057656433	5.15368964572232e-05	Cysteine-rich receptor-like protein kinase 10
CITRE_003g025010	-0.423586733098276	5.16917471036376e-05	conserved hypothetical protein
CITRE_020g000080	-0.216560648884916	5.19896261864487e-05	putative protein kinase domain-containing protein
CITRE_007g005250	-0.41378726747123	5.24305208582537e-05	conserved hypothetical protein
CITRE_009g032870	1.30669226826527	5.43790516719603e-05	NAC domain-containing protein
CITRE_005g030580	0.396798754525214	5.52506259195984e-05	Filament-like plant protein
CITRE_009g020370	-0.663238478026509	5.82056266103386e-05	DUF4005 domain-containing protein
CITRE_003g002430	0.460464040192547	5.85437971905877e-05	putative membrane-associated kinase regulator 2
CITRE_009g020850	-1.05548086427549	6.24291455637358e-05	putative Receptor-like protein EIX1
CITRE_003g036730	-0.471597304168101	6.36032964576781e-05	La-related protein 6B
CITRE_007g030510	-0.681393093636387	6.36032964576781e-05	conserved hypothetical protein
CITRE_005g024990	-0.637512103661039	6.51066629544159e-05	putative Histidine kinase CKI1
CITRE_002g026130	-0.961009976469899	6.52186106865024e-05	putative Loganic acid O-methyltransferase
CITRE_006g008990	-0.43357413253959	6.52186106865024e-05	Glutathione S-transferase L3
CITRE_009g021250	-1.02391758702486	6.52186106865024e-05	putative Receptor-like protein EIX1
CITRE_006g028030	-0.537865807278344	6.60589580913928e-05	putative Thaumatin-like protein
CITRE_002g005280	1.44073263003988	6.72163690565239e-05	Protein kinase domain-containing protein
CITRE_003g043910	-0.620629770695846	6.72761843287414e-05	UDP-glycosyltransferase 76B1
CITRE_004g030900	-1.10678753680933	6.72761843287414e-05	Germin-like protein
CITRE_007g005900	-0.476628187817973	6.72761843287414e-05	DAO domain-containing protein
CITRE_009g019570	-0.527428621812762	6.80733142277502e-05	conserved hypothetical protein
CITRE_007g009080	-0.518316725252096	6.80772549616578e-05	Glycosyltransferase
CITRE_001g031650	0.501320641412684	6.84250930208078e-05	BHLH domain-containing protein
CITRE_003g022310	-0.434198930738216	6.94062043983695e-05	Photosystem II 10 kDa polypeptide%2C chloroplastic
CITRE_008g003620	-0.792044271179243	6.94062043983695e-05	conserved hypothetical protein
CITRE_008g001580	-0.18996203446824	7.05222412654324e-05	V-type proton ATPase subunit B 1
CITRE_008g029030	0.887120262153778	7.07519385653096e-05	conserved hypothetical protein
CITRE_001g010000	0.159844382179287	7.16489405788241e-05	Protein-serine/threonine phosphatase
CITRE_005g024980	-0.474340413888591	7.31458065646045e-05	Usp domain-containing protein
CITRE_002g010030	-0.288392370033125	7.45490909490636e-05	conserved hypothetical protein
CITRE_008g032410	-0.227020909609536	7.48333271883193e-05	NAD-dependent epimerase/dehydratase
CITRE_005g012520	-0.287497306796429	7.67209804596143e-05	Switch 2
CITRE_003g012280	-0.552006718945986	7.69550679442671e-05	NAC domain-containing protein
CITRE_001g014840	0.384570832214535	7.69636465334507e-05	putative G-type lectin S-receptor-like serine/threonine-protein kinase At4g27290
CITRE_003g010910	-0.440215532413023	7.93185454765809e-05	Geraniol 8-hydroxylase
CITRE_002g011110	0.926049553020159	8.072073498664e-05	Peroxidase
CITRE_006g023400	-0.511399219270153	8.072073498664e-05	putative PsbP domain-containing protein 6%2C chloroplastic
CITRE_005g035390	-0.907837868149936	8.13786170523202e-05	ABA 8'-hydroxylase
CITRE_006g013790	1.9307334737997	8.29646558426819e-05	conserved hypothetical protein
CITRE_003g040100	0.545602362987862	8.31889527651083e-05	putative protein kinase domain-containing protein
CITRE_003g045680	1.32539558925198	8.32109863201966e-05	conserved hypothetical protein
CITRE_004g022650	0.903905602790979	8.35703996447716e-05	Telomerase reverse transcriptase
CITRE_006g013450	0.642345136212637	8.35703996447716e-05	Protein kinase domain-containing protein
CITRE_003g032430	0.407900314467236	8.39487245202513e-05	putative F-box protein GID2
CITRE_003g031730	0.744350374901461	8.40442563346674e-05	Fe2OG dioxygenase domain-containing protein
CITRE_009g014300	1.21928630838135	8.40442563346674e-05	Protein kinase domain-containing protein
CITRE_005g030090	0.398857796353792	8.41837797121628e-05	putative O-fucosyltransferase 11
CITRE_003g056410	-0.919315977100366	8.51054605698128e-05	Germin-like protein
CITRE_008g014120	-0.441595266555437	8.68324128668881e-05	J domain-containing protein
CITRE_003g006360	-0.465528706450273	8.72939472919777e-05	High-affinity nitrate transporter
CITRE_010g002050	-0.206246332755015	8.76184407682897e-05	Cyclin-dependent kinase F-4
CITRE_007g033210	-0.309400771614429	8.81035442703207e-05	PLAT domain-containing protein
CITRE_003g023580	-0.34715475578157	8.82731513524002e-05	RING-type E3 ubiquitin transferase
CITRE_004g002070	0.482252052107434	8.82731513524002e-05	Protein-serine/threonine phosphatase
CITRE_005g038270	-0.342184453186739	9.09656479997813e-05	conserved hypothetical protein
CITRE_003g050080	1.14375816080977	9.16251578454818e-05	LOB domain-containing protein
CITRE_006g021830	-1.65186722601696	9.26283641340253e-05	conserved hypothetical protein
CITRE_005g002050	-1.29431998933937	9.27988046614207e-05	putative DNA binding protein
CITRE_006g001010	-1.18835983593167	9.3002632184957e-05	Protein kinase domain-containing protein
CITRE_007g003130	0.445298232920898	9.3002632184957e-05	putative Replication factor C subunit 3
CITRE_007g011510	-0.556287525818733	9.31825216091577e-05	Potassium transporter
CITRE_003g005700	-0.396635427800903	9.35079148197885e-05	conserved hypothetical protein
CITRE_002g033920	-2.39853496526667	9.38762042647032e-05	Thiamine thiazole synthase%2C chloroplastic
CITRE_004g021370	-0.44486166308378	9.39603750313771e-05	Cytochrome P450 89A2
CITRE_004g024420	0.462262931452836	9.39603750313771e-05	conserved hypothetical protein
CITRE_007g009680	-0.731356318406951	9.39603750313771e-05	putative Auxin-responsive protein SAUR32
CITRE_007g020900	-0.482547305999861	9.39603750313771e-05	conserved hypothetical protein
CITRE_007g012650	0.74456489988758	9.49869424415649e-05	conserved hypothetical protein
CITRE_006g026780	-0.537100244631941	9.55678788426984e-05	putative ABC transporter G family member 14
CITRE_004g002710	-0.544768465715775	9.82907541987554e-05	Laccase
CITRE_004g015760	-0.419807107647683	9.85422324026686e-05	putative Uncharacterized mitochondrial protein AtMg00310
CITRE_003g020990	-1.17002778444976	0.000100338810540478	putative Cytochrome P450 72A68
CITRE_002g039920	0.583336110893712	0.000100746075711242	Aspartic proteinase
CITRE_002g002770	1.39312098146111	0.000102155198746007	conserved hypothetical protein
CITRE_003g021900	-1.19057224015236	0.000102155198746007	CASP-like protein
CITRE_008g026640	0.382065617667992	0.000102155198746007	P-loop NTPase domain-containing protein LPA1
CITRE_008g028450	0.997711719034389	0.000102344554863363	conserved hypothetical protein
CITRE_001g008420	-0.333371828957137	0.000104335255904534	Nudix hydrolase domain-containing protein
CITRE_004g001710	-0.718072206585002	0.000106987583175006	Chlorophyll a-b binding protein%2C chloroplastic
CITRE_006g020860	-0.184824487436448	0.000110178430226845	conserved hypothetical protein
CITRE_007g004630	-0.410308656774981	0.000110178430226845	AB hydrolase-1 domain-containing protein
CITRE_009g002910	0.509095162989936	0.000110178430226845	conserved hypothetical protein
CITRE_009g021140	-1.37650773559964	0.000112638407913635	putative LRRNT_2 domain-containing protein
CITRE_031g000460	-0.700960028588517	0.000113736406099297	Nuclear factor Y%2C subunit B3
CITRE_002g027390	-0.791450335734503	0.00011438949104232	HMA domain-containing protein
CITRE_002g001550	2.11088292775491	0.000116309378869871	Peroxidase
CITRE_009g020950	-1.20149199357326	0.000117261001086314	putative LRRNT_2 domain-containing protein
CITRE_007g019390	-2.20051085376623	0.000120231179624584	Protein kinase domain-containing protein
CITRE_002g020600	-1.1795009186775	0.000121447176640864	Fe2OG dioxygenase domain-containing protein
CITRE_005g031180	-0.772198001015838	0.000129188286579206	Fe2OG dioxygenase domain-containing protein
CITRE_004g017840	-1.53564206343144	0.000129433979228697	3%2C9-dihydroxypterocarpan 6A-monooxygenase
CITRE_003g032820	0.949374314526186	0.000130342904652723	putative Disease resistance protein Roq1
CITRE_009g000070	1.34497243915685	0.000130565657535038	conserved hypothetical protein
CITRE_004g032290	0.227757983547533	0.000130988625494379	RING-type domain-containing protein
CITRE_005g037270	-0.242068994721025	0.000131155998082881	Tubby-like F-box protein
CITRE_002g032900	0.730250273501744	0.000131469193774839	Protein kinase domain-containing protein
CITRE_002g033180	0.587102114895953	0.000131469193774839	conserved hypothetical protein
CITRE_007g002350	1.7116666646557	0.000131709137946805	conserved hypothetical protein
CITRE_006g018470	0.746318204989398	0.000131756759697062	Peroxidase
CITRE_007g014140	0.136639801144868	0.000134680637528673	conserved hypothetical protein
CITRE_006g022300	1.02056374627948	0.000135206268726037	conserved hypothetical protein
CITRE_007g020870	-0.16849357146567	0.000135206268726037	Protein-serine/threonine phosphatase
CITRE_002g005320	1.23406989601089	0.000136446694390838	putative protein kinase domain-containing protein
CITRE_014g000710	0.258027950545418	0.000136893169444937	putative disease resistance protein At3g14460
CITRE_003g033850	0.487121316931747	0.000137684892097262	putative CobW C-terminal domain-containing protein
CITRE_005g031150	-0.541914288208104	0.000143345000056146	putative Amino-acid permease BAT1
CITRE_004g018950	-0.894219791310698	0.000146920854353492	Coumarin 8-geranyltransferase 1b%2C chloroplastic
CITRE_005g017340	-0.590042024344228	0.000146920854353492	conserved hypothetical protein
CITRE_009g006680	-0.299263578161883	0.000146920854353492	Protein CDC73
CITRE_005g022600	1.04279473370809	0.000147060830761986	conserved hypothetical protein
CITRE_008g023270	-0.216011634181472	0.000148988691914695	Vesicle-associated membrane protein 714
CITRE_003g024240	-0.799454403038584	0.000150453719564205	conserved hypothetical protein
CITRE_003g000950	-1.21827274951919	0.000152172300574389	Aluminum-activated malate transporter 10
CITRE_003g009300	-0.290806820131017	0.000153741123023827	Formyl_trans_N domain-containing protein
CITRE_008g003680	0.694376576492242	0.000154450163216214	conserved hypothetical protein
CITRE_005g030250	0.685853059844772	0.000157431051773711	Protein NODULATION SIGNALING PATHWAY 2
CITRE_008g018390	2.25654362457612	0.000162795314412664	putative Lignin-forming anionic peroxidase
CITRE_008g025990	0.998538929324343	0.000162795314412664	C2H2-type domain-containing protein
CITRE_006g026790	-0.532041506044628	0.000164998297640529	putative ABC transporter G family member 14
CITRE_009g005120	0.503404677034231	0.000164998297640529	DLH domain-containing protein
CITRE_002g023790	-0.269718285129504	0.00016913211384865	putative Ribonuclease 1
CITRE_001g004000	0.382149515161303	0.000170017558658239	Tify domain-containing protein
CITRE_007g029330	0.529546220236602	0.000170017558658239	WAT1-related protein At5g64700
CITRE_002g037630	-0.678267758632797	0.000170127092788105	RING-CH-type domain-containing protein
CITRE_003g032180	0.704674790504989	0.000170127092788105	Hypothetical protein
CITRE_006g012200	-0.511625762017656	0.000170127092788105	Protein NRT1/ PTR FAMILY 5.7
CITRE_008g023850	0.621964001109595	0.000170127092788105	CEN-like protein 2
CITRE_003g000800	0.991245341556035	0.000174620250563155	Metal-nicotianamine transporter YSL1
CITRE_006g003530	-0.368489272320141	0.000174620250563155	Mediator of RNA polymerase II transcription subunit 20
CITRE_007g027610	0.724591072383311	0.000174620250563155	Beta-amyrin 28-monooxygenase
CITRE_008g003540	-0.208457938538072	0.000174620250563155	Magnesium transporter
CITRE_009g006580	-0.65448795442514	0.000174620250563155	conserved hypothetical protein
CITRE_001g010810	-0.940021770532584	0.00017569862246256	Protein kinase domain-containing protein
CITRE_002g030270	1.43557019686174	0.00017569862246256	conserved hypothetical protein
CITRE_003g049940	-0.797071144079433	0.000176591924188577	putative protein DOWNY MILDEW RESISTANCE 6
CITRE_005g017330	-0.425299109187336	0.000179515991775667	conserved hypothetical protein
CITRE_003g042100	0.238790860361241	0.000186567912666379	Reticulon-like protein
CITRE_004g000150	-0.270570566585672	0.000187572247265745	putative protein INVOLVED IN DE NOVO 2
CITRE_002g004650	1.3435654162148	0.000193431137717743	putative ABC transporter G family member 15
CITRE_001g028180	0.45609945018204	0.000193582898679226	Proteasome subunit alpha type-6
CITRE_002g034050	0.823711036414525	0.000193850769214208	putative protein NDR1
CITRE_002g040470	0.655844946157274	0.0001965172577105	putative Mitochondrial pyruvate carrier 4
CITRE_003g009250	-0.599106450230383	0.0001965172577105	DNA mismatch repair protein MSH4
CITRE_004g021180	-0.198739362280499	0.0001965172577105	conserved hypothetical protein
CITRE_014g000070	0.905504809995325	0.0001965172577105	CaATP_NAI domain-containing protein
CITRE_001g004730	-0.269623996478831	0.000207784867021812	conserved hypothetical protein
CITRE_001g031900	-0.619112478579725	0.000207784867021812	conserved hypothetical protein
CITRE_006g023940	-0.323718430515539	0.000209557858452957	Senescence-associated protein AAF%2C chlorolplastic
CITRE_007g011910	0.334515720615959	0.000209557858452957	NB-ARC domain-containing protein
CITRE_009g000300	-0.251398023427517	0.000212587382494299	GTP diphosphokinase
CITRE_008g032240	-0.729269074962557	0.000216629746024676	N-acetyltransferase domain-containing protein
CITRE_008g024890	-0.548261603224363	0.000223993852839217	Aa_trans domain-containing protein
CITRE_007g003770	0.272418830917891	0.000225081101145117	Pentatricopeptide repeat-containing protein At4g36680%2C mitochondrial
CITRE_001g034870	0.270478652310062	0.000240449243450767	Calmodulin-binding protein 60 E
CITRE_003g062880	-0.289987119710345	0.000240894226257981	Ras-related protein RABH1b
CITRE_001g004230	0.594635457215363	0.000248163570832453	FLZ-type domain-containing protein
CITRE_005g028200	-0.426156715672686	0.000253858300428605	conserved hypothetical protein
CITRE_003g031150	0.484652867109812	0.000254899337511058	conserved hypothetical protein
CITRE_007g020170	0.447323094107357	0.000266752964081862	Protein kinase domain-containing protein
CITRE_026g000110	-0.533773935922925	0.000269923629708549	ADP-ribosyl cyclase/cyclic ADP-ribose hydrolase
CITRE_006g005030	-0.22978982534087	0.000273434370980403	Ethanolamine-phosphate cytidylyltransferase
CITRE_009g010070	0.336290868922043	0.000275650059577188	putative Polyubiquitin
CITRE_009g022690	-0.763870271573895	0.000275698988692541	Hypothetical protein
CITRE_002g025810	-0.206516341353303	0.00027840557877984	C2H2-type domain-containing protein
CITRE_003g001770	-0.159194241665934	0.000282459518101788	conserved hypothetical protein
CITRE_003g053490	-0.215495906275212	0.000283502310347435	Xyloglucan 6-xylosyltransferase 2
CITRE_005g026350	-0.238152505732694	0.000285631255452878	F-box domain-containing protein
CITRE_003g013970	-0.376719469583367	0.00029360719135759	SBP-type domain-containing protein
CITRE_004g004580	0.262680238408495	0.00029360719135759	Heat shock 70 kDa protein 1
CITRE_004g019230	-0.418772687035718	0.00029360719135759	conserved hypothetical protein
CITRE_002g009120	0.211657636833788	0.000293813696244481	conserved hypothetical protein
CITRE_015g000150	0.822073182602947	0.000293813696244481	TIR domain-containing protein
CITRE_003g011990	0.585969718937828	0.000296894614772133	ZF-HD dimerization-type domain-containing protein
CITRE_010g000700	0.549629854656641	0.000301307069600692	Hypothetical protein
CITRE_003g056220	-0.296499014127087	0.000304239233303391	WRKY domain-containing protein
CITRE_008g008670	-0.318017107307664	0.00031384421628799	BHLH domain-containing protein
CITRE_008g028390	-0.211508095559365	0.000324894808092333	Formin-like protein
CITRE_006g013080	-0.294837321744058	0.000333184671170374	Protein NRT1/ PTR FAMILY 8.1
CITRE_003g005230	-0.216184247979206	0.000348518146037497	Protein kinase domain-containing protein
CITRE_006g020740	1.11391914472154	0.000354068309686886	Protein argonaute MEL1
CITRE_004g003690	-0.89109633552566	0.000354545527834669	Response regulatory domain-containing protein
CITRE_003g058190	0.179765519993227	0.00036203748410131	DEAD-box ATP-dependent RNA helicase 31
CITRE_001g000180	-0.566013833919522	0.000365472597713032	Hypothetical protein
CITRE_005g008080	-0.159677198992411	0.000376342960464634	Membralin-like protein At1g60995
CITRE_009g001360	0.252070704652939	0.000384636211753544	FCP1 domain-containing protein
CITRE_001g001250	0.566441944936224	0.000388701994863862	Hypothetical protein
CITRE_008g021900	-0.139351095868998	0.000464298829959238	Protein IQ-DOMAIN 5
CITRE_008g027890	-1.59815792878275	0.000728532556681399	Patatin

## Sheet: CL ROOTS STRESS GENES
			Gene	log2FoldChange	padj	annotation
			CITRE_002g022910	-2.44233137936059	3.21509467878207e-92	Zinc finger protein CONSTANS-LIKE 9
			CITRE_003g008050	-2.33738311616295	1.66972105445627e-64	Beta-amylase
			CITRE_008g005560	-1.50159551806688	4.27369979880272e-56	putative Cold-regulated protein 27
			CITRE_003g025260	-1.43778630418671	1.30960895057308e-54	Protein kinase domain-containing protein
			CITRE_003g021160	1.83341908797926	5.76795357607779e-54	Cytochrome P450 CYP72A219
			CITRE_003g001820	0.506967913028358	4.00376206614146e-50	AB hydrolase-1 domain-containing protein
			CITRE_006g021540	-0.887850000812264	5.11755494398629e-50	ABC transporter G family member 34
			CITRE_007g017190	1.90637711867432	6.42489925499963e-47	Caffeoyl-CoA O-methyltransferase
			CITRE_006g024750	-1.47878466025949	6.70607041495915e-47	HMA domain-containing protein
			CITRE_004g031000	1.6005414320572	3.82252960068437e-45	Transcription factor MYB1R1
			CITRE_004g028010	-0.810124305699356	2.14591491837334e-43	conserved hypothetical protein
			CITRE_007g004100	1.4155391711758	3.82830310119062e-40	conserved hypothetical protein
			CITRE_002g029500	0.908107850835802	4.31758966772004e-40	conserved hypothetical protein
			CITRE_004g033230	-0.880828886100294	8.23527075998914e-40	putative Zinc finger protein CONSTANS-LIKE 15
			CITRE_005g012400	1.25540687906716	8.23527075998914e-40	putative protein LNK3
			CITRE_003g011790	-1.85873326177318	1.90044218863155e-39	UDP-glucose 4-epimerase
			CITRE_003g058580	1.40111491469584	1.90044218863155e-39	GDSL esterase/lipase At4g01130
			CITRE_008g010320	1.33256829216136	9.42430586208456e-39	B-box zinc finger protein 19
			CITRE_006g009830	1.62483961789501	1.50612823682376e-38	WAT1-related protein
			CITRE_005g034270	-0.487697755608606	2.11277556544416e-38	1-phosphatidylinositol-3-phosphate 5-kinase
			CITRE_002g010570	-2.95542678716031	1.21706483869039e-37	conserved hypothetical protein
			CITRE_003g058160	0.751987923764003	2.5605111184101e-36	conserved hypothetical protein
			CITRE_004g022350	-0.712367287516975	3.42457700821632e-36	conserved hypothetical protein
			CITRE_002g026220	-0.746190774159675	1.13558151382314e-35	Adagio protein 3
			CITRE_002g033740	3.80013349091618	4.83622222510792e-35	TPT domain-containing protein
			CITRE_004g023950	-0.752236904845612	8.91295605179497e-35	TCP domain-containing protein
			CITRE_005g034760	-0.82266750300043	2.51672397027701e-34	Transcription factor MYB44
			CITRE_008g027580	0.569292313305677	1.02278104228202e-33	C2H2-type domain-containing protein
			CITRE_001g029960	0.576597383720498	5.86056744207749e-33	conserved hypothetical protein
			CITRE_002g027440	0.540346012611692	8.69274651228069e-33	EAF domain-containing protein
			CITRE_008g005530	0.952857634110342	8.87132407420907e-33	BZIP domain-containing protein
			CITRE_005g007060	-2.54364547037418	2.31065604737664e-32	putative F-box protein PP2-B10
			CITRE_003g000850	0.401328205932057	3.23735143428671e-32	conserved hypothetical protein
			CITRE_006g022440	1.1626516539908	4.73721157901611e-32	BZIP domain-containing protein
			CITRE_002g040500	1.87725183105841	3.51375028074955e-31	conserved hypothetical protein
			CITRE_007g019810	0.919452421555356	8.71552037739755e-30	DRBM domain-containing protein
			CITRE_003g002600	0.560605214535294	3.51729509466878e-29	G-patch domain-containing protein
			CITRE_002g027480	-1.06028504587685	8.0819501510551e-29	Protein PIN-LIKES 2
			CITRE_001g028350	0.757058777158786	9.00127237343458e-29	FLZ-type domain-containing protein
			CITRE_007g027890	-0.641451651830621	1.92537600693267e-28	Protein kinase domain-containing protein
			CITRE_006g027460	1.39799402800588	2.09332037142227e-28	Aa_trans domain-containing protein
			CITRE_008g031370	1.13327521349884	2.09332037142227e-28	Alpha-1%2C4 glucan phosphorylase
			CITRE_005g031800	-0.990755581374152	2.11677879048889e-28	conserved hypothetical protein
			CITRE_003g040360	-0.784200945443947	3.04822010905977e-28	NB-ARC domain-containing protein
			CITRE_003g060460	1.29430242478123	5.08944496459353e-28	RING-type domain-containing protein
			CITRE_003g052850	1.40850237793344	7.17637900776817e-28	Flavin-containing monooxygenase
			CITRE_003g060720	0.514090494207197	8.75453277224296e-28	Histone deacetylase complex subunit SAP18
			CITRE_008g015660	1.13466596939299	1.09472359142498e-27	conserved hypothetical protein
			CITRE_002g038510	0.873063701324481	1.11757712231042e-27	Cold-regulated 413 inner membrane protein 2%2C chloroplastic
			CITRE_001g005690	-0.866073199956158	1.56166239512263e-27	putative protein EARLY FLOWERING 3
			CITRE_005g033750	0.570340121419363	2.34640658869324e-27	DEAD-box ATP-dependent RNA helicase FANCM
			CITRE_004g030470	2.78192557555666	2.41236311580997e-27	WAT1-related protein At1g70260
			CITRE_008g029830	1.59096211324029	2.60617954391449e-27	Outer envelope pore protein 16%2C chloroplastic
			CITRE_009g015530	-0.260697261404676	5.33931795433646e-27	26S proteasome non-ATPase regulatory subunit 1
			CITRE_002g033090	0.99929277037911	6.63527679537506e-27	conserved hypothetical protein
			CITRE_004g029080	-1.73172037100265	6.63527679537506e-27	Alpha-L-fucosidase 3
			CITRE_002g021730	-1.02167695904606	9.66563379574094e-27	putative Calcium-transporting ATPase 12%2C plasma membrane-type
			CITRE_004g031580	0.903077658755914	1.09125129216213e-26	conserved hypothetical protein
			CITRE_006g015220	-0.975197954345921	2.06800926616558e-26	Protein LURP-one-related 15
			CITRE_005g037890	0.577937557147055	3.19889733548836e-26	conserved hypothetical protein
			CITRE_007g014340	0.436295802024158	3.35403114890188e-26	conserved hypothetical protein
			CITRE_006g019400	0.589652517718527	3.7850838242333e-26	Sucrose-phosphatase
			CITRE_003g053690	1.3935656912581	4.21500427798276e-26	putative Beta-glucosidase 11
			CITRE_004g005880	0.656808754192959	5.09741969215412e-26	putative Chalcone--flavanone isomerase
			CITRE_003g047880	0.520105278174952	1.33039420204817e-25	Small ubiquitin-related modifier
			CITRE_008g024130	0.552920908375657	1.41667463007762e-25	DUF663 domain-containing protein
			CITRE_003g055420	-1.37340541902725	1.44203179775248e-25	Stachyose synthase
			CITRE_007g031060	0.571575149131167	1.84341926003326e-25	ABC transporter F family member 5
			CITRE_005g033790	-0.636534484040123	3.76994877093354e-25	Alkaline/neutral invertase
			CITRE_003g038520	0.561907005819035	1.03837089745164e-24	conserved hypothetical protein
			CITRE_003g001240	1.17378803712324	1.05047839937529e-24	Cellulose synthase-like protein G3
			CITRE_002g007770	0.923865642234251	1.48622152581608e-24	CASP-like protein
			CITRE_004g027120	-0.866886698299521	3.12407071937255e-24	conserved hypothetical protein
			CITRE_007g001530	0.782102490019923	7.02470810803791e-24	Alpha-mannosidase
			CITRE_002g035540	0.358036478576074	8.11886855361507e-24	conserved hypothetical protein
			CITRE_003g004260	-0.863673189308036	9.30610572704071e-24	AAA domain-containing protein
			CITRE_005g040030	-0.980354955152684	1.12864946479979e-23	Bromo domain-containing protein
			CITRE_005g008180	-0.982773386416084	1.41469333028373e-23	putative Coumarin 8-geranyltransferase 1b%2C chloroplastic
			CITRE_002g020610	0.919208465759891	1.43762136137703e-23	Tyrosine-protein phosphatase domain-containing protein
			CITRE_001g022540	-0.590376509915317	2.28531242068945e-23	AAA domain-containing protein
			CITRE_006g029460	1.71553688781705	2.45213802989055e-23	Phosphate transporter PHO1
			CITRE_003g061040	-0.43196612086528	3.5407103832406e-23	SEC7 domain-containing protein
			CITRE_005g033340	-0.900585017686601	1.22136119100233e-22	putative choline kinase 3
			CITRE_006g020610	0.491054526742356	1.30524520773376e-22	Protein ORANGE-LIKE%2C chloroplastic
			CITRE_005g037220	-4.71994256457708	1.49189509620906e-22	Myb-like domain-containing protein
			CITRE_009g007740	0.458868979093359	1.51377278518805e-22	Non-specific serine/threonine protein kinase
			CITRE_001g009120	-1.47192484684592	2.17605950952608e-22	MFS domain-containing protein
			CITRE_001g003860	0.510091832399327	2.73539139058911e-22	Protein-serine/threonine phosphatase
			CITRE_003g003570	-0.73600455646122	4.21345211638087e-22	putative pentatricopeptide repeat-containing protein At1g74580
			CITRE_006g010110	1.17260884027399	5.20993536076395e-22	Na_H_Exchanger domain-containing protein
			CITRE_002g040040	-1.03113808002761	6.48945650629729e-22	putative LysM domain receptor-like kinase 3
			CITRE_001g006440	0.610682179920924	7.51670407824531e-22	Epimerase domain-containing protein
			CITRE_006g006000	1.21115570741963	8.25468753154382e-22	conserved hypothetical protein
			CITRE_002g006510	-1.04862446139661	8.35068899060926e-22	F-box domain-containing protein
			CITRE_002g030820	-0.759538990334142	8.46287331852391e-22	Protein NARROW LEAF 1
			CITRE_001g005700	-0.854333480270848	1.53681459457712e-21	putative protein EARLY FLOWERING 3
			CITRE_008g005380	-1.11598507753122	2.4380777044141e-21	putative PI-PLC X domain-containing protein At5g67130
			CITRE_002g001340	-0.956257686825094	3.6432032551561e-21	conserved hypothetical protein
			CITRE_002g030340	0.496925981137897	3.68630601654932e-21	2%2C4-dienoyl-CoA reductase ((3E)-enoyl-CoA-producing)
			CITRE_008g026110	-1.62656883355142	4.37830442487528e-21	E3 ubiquitin-protein ligase RZFP34
			CITRE_009g005900	0.420487635740826	5.49509998759367e-21	Chloride channel protein
			CITRE_003g011630	1.13505596660056	6.39592815541164e-21	Protein HAPLESS 2
			CITRE_002g015600	1.1555386294672	6.93824484253981e-21	Squamosa promoter-binding protein 2
			CITRE_004g016870	-0.598067733972358	8.63662750081295e-21	Alpha-mannosidase
			CITRE_005g024240	-1.56331460925277	9.37412878177358e-21	Bidirectional sugar transporter SWEET
			CITRE_002g029630	0.509067522657407	1.14638957550363e-20	conserved hypothetical protein
			CITRE_008g032730	-0.748073487935057	1.31126921766142e-20	Exocyst subunit Exo70 family protein
			CITRE_006g023070	-0.367778664231226	1.42771057292568e-20	putative 4-alpha-glucanotransferase DPE2
			CITRE_008g008980	1.77980503052763	1.4624240682286e-20	Glucose-1-phosphate adenylyltransferase
			CITRE_009g021940	1.69977552566679	1.73522701133225e-20	conserved hypothetical protein
			CITRE_003g052230	0.776486588903262	1.85016739270287e-20	Fe2OG dioxygenase domain-containing protein
			CITRE_001g007820	-1.12856670880679	1.99328228299304e-20	conserved hypothetical protein
			CITRE_008g019510	1.41375755348435	2.53547118093938e-20	Phosphoenolpyruvate carboxylase kinase 2
			CITRE_008g018910	-0.512250682983613	2.83889212992364e-20	DEP domain-containing protein
			CITRE_026g000440	0.466478512384384	3.37882210816602e-20	CLP protease regulatory subunit CLPX3%2C mitochondrial
			CITRE_003g046700	-1.09397763364154	4.30234793851743e-20	Tubulin alpha-3 chain
			CITRE_006g020390	-0.752191755812721	5.46337917691322e-20	LETM1 domain-containing protein
			CITRE_003g031220	0.948298410296248	5.91044542973395e-20	AB hydrolase-1 domain-containing protein
			CITRE_006g030170	-0.570818083858931	6.27777435084237e-20	Protein kinase domain-containing protein
			CITRE_006g018380	-1.19595483544722	6.87850764381596e-20	Protein kinase domain-containing protein
			CITRE_002g020310	-0.283980771760252	7.14930115716819e-20	Serine/threonine protein phosphatase 2A regulatory subunit
			CITRE_003g049630	0.325924928329483	7.22881606175661e-20	putative lysine-specific demethylase JMJ16
			CITRE_006g018920	-1.68640450468815	8.68836636378543e-20	F-box domain-containing protein
			CITRE_005g004180	0.29358856678208	1.48505528300272e-19	Heat shock 70 kDa protein 6%2C chloroplastic
			CITRE_001g028320	-0.720078833408294	1.49190028806119e-19	Tify domain-containing protein
			CITRE_004g029070	-1.02025059492679	1.51326046647981e-19	GDSL esterase/lipase At5g14450
			CITRE_006g027700	0.482513253365078	1.51326046647981e-19	SAM domain-containing protein
			CITRE_001g018150	0.355148868112669	1.53678887612394e-19	conserved hypothetical protein
			CITRE_003g047330	-0.951263626162785	1.64938487491699e-19	Choline transporter-like protein
			CITRE_009g010390	0.713167096382949	1.77172028886095e-19	PAP_fibrillin domain-containing protein
			CITRE_001g014220	0.343559935718483	2.21241451759468e-19	Vacuolar protein sorting-associated protein 2
			CITRE_003g023320	-0.604102228010928	2.2393477715019e-19	Elongation factor 2
			CITRE_003g011310	0.604480304320742	2.41096206445843e-19	TCP domain-containing protein
			CITRE_006g005930	0.695256091705257	2.53719107112374e-19	putative protein PTST%2C chloroplastic
			CITRE_008g021780	0.609057303590879	2.62808134259109e-19	Str_synth domain-containing protein
			CITRE_005g033150	-1.3088801801554	3.67362372191946e-19	Peroxidase
			CITRE_007g031500	0.77579045589214	4.56141261864429e-19	Protein kinase domain-containing protein
			CITRE_008g028520	-0.551135293984726	5.32756669182952e-19	Response regulatory domain-containing protein
			CITRE_009g006270	-0.516445710799312	6.47750639597847e-19	PHD-type domain-containing protein
			CITRE_009g019650	-0.344731606996213	7.53224703411982e-19	PAM2 domain-containing protein
			CITRE_003g053810	0.3961998346978	8.34488718991442e-19	Brix domain-containing protein
			CITRE_008g024520	1.02197614642196	9.41294517954667e-19	2-carboxy-D-arabinitol-1-phosphatase
			CITRE_008g031580	-1.39499296901206	9.57052810177747e-19	C2H2-type domain-containing protein
			CITRE_008g021970	0.494534025390786	9.81010941953757e-19	J domain-containing protein
			CITRE_009g022790	-0.94598324488724	1.0008340636694e-18	putative disease resistance protein RGA3
			CITRE_007g009500	0.548923857614162	1.16970240659421e-18	Protein kinase domain-containing protein
			CITRE_008g005570	-0.427016851358255	1.17556503264382e-18	Fucosyltransferase
			CITRE_001g026440	-0.493606965906865	1.18355331422745e-18	Cellulose synthase-like protein E1
			CITRE_009g001330	0.469675273710785	1.18355331422745e-18	DNA replication complex GINS protein SLD5
			CITRE_001g001170	1.16432796856634	1.2505410144234e-18	conserved hypothetical protein
			CITRE_003g057150	1.35655357101711	1.25265589831636e-18	Starch synthase%2C chloroplastic/amyloplastic
			CITRE_001g015930	0.511471714328415	1.54556885760017e-18	PP28 domain-containing protein
			CITRE_002g026520	-0.675867382281727	1.75323694897646e-18	Plasmodesmata-located protein 6
			CITRE_038g000130	1.38825100234672	1.90276031952786e-18	Protein kinase domain-containing protein
			CITRE_003g026460	2.55749968107554	2.32325243790874e-18	Acid phosphatase
			CITRE_002g030350	0.662602799925501	2.75298243305546e-18	putative Peroxisomal 2%2C4-dienoyl-CoA reductase [(3E)-enoyl-CoA-producing]
			CITRE_003g010090	-0.322808755208291	2.82111140253445e-18	Transaldolase
			CITRE_001g002840	-0.857738843069478	2.89774327338262e-18	F-box domain-containing protein
			CITRE_006g017480	0.385382132845583	4.19104369192594e-18	Choline-phosphate cytidylyltransferase
			CITRE_006g006130	0.367170887995236	4.62241506702428e-18	conserved hypothetical protein
			CITRE_006g009940	-0.678466345992813	4.75100457547925e-18	conserved hypothetical protein
			CITRE_004g035180	0.564302537442927	5.30751657288422e-18	conserved hypothetical protein
[truncated: 4,924 more rows]

## Sheet: PO LEAVES INTERACTION GENES
Gene	log2FoldChange	padj	annotation
[truncated: 3,517 more rows]

[truncated: 22 more sheets: PO LEAVES PLOIDY GENES, PO LEAVES STRESS GENES, PO ROOTS INTERACTION GENES, PO ROOTS PLOIDY GENES, PO ROOTS STRESS GENES, Feuil13, GO analysis interaction, CL LEAVES CLUSTERS, Gene CL leaves, CL ROOTS CLUSTERS, Gene CL roots, PO LEAVES CLUSTERS, Gene PO leaves, PO ROOTS CLUSTERS, Gene PO roots, DEGs Stress, DEGs ploidy, DEGs ploidy control conditions, gene of interest, gene of interest ploidy …]
